# Supplementary material for: Chromium-catalyzed stereodivergent E- and Z-selective alkyne hydrogenation controlled by cyclic (alkyl)(amino)carbene ligands
Source: Springer Nature journal article supplement (doi:10.1038/s41467-023-36677-9), 2023-02-22
Supplement: MOESM1 [file 41467_2023_36677_MOESM1_ESM.pdf]

## Supplementary Information

### **Chromium-catalyzed stereodivergent *E*- and *Z*-selective alkyne hydrogenation controlled by cyclic (alkyl)(amino)carbene ligands**

Liang Ling,<sup>1</sup> Chenyang Hu,<sup>2</sup> Linhong Long<sup>3</sup>, Xue Zhang,<sup>1</sup> Lixing Zhao,<sup>1</sup> Liu Leo  
Liu,<sup>2</sup> Hui Chen<sup>3\*</sup>, Meiming Luo<sup>1\*</sup> & Xiaoming Zeng<sup>1\*</sup>

<sup>1</sup>Key Laboratory of Green Chemistry & Technology, Ministry of Education,  
College of Chemistry, Sichuan University, Chengdu 610064, China;

<sup>2</sup>Shenzhen Grubbs Institute and Department of Chemistry, Southern University  
of Science and Technology; Shenzhen 518055, China

<sup>3</sup>Beijing National Laboratory for Molecular Sciences (BNLMS), Key Laboratory  
of Photochemistry, CAS Research/Education Center for Excellence in  
Molecular Sciences, Institute of Chemistry, Chinese Academy of Sciences,  
Beijing 100190, China

## Table of Contents

|                                                                                                                                                                    |     |
|--------------------------------------------------------------------------------------------------------------------------------------------------------------------|-----|
| 1. Supplementary Methods .....                                                                                                                                     | 3   |
| 2. Supplementary Synthesis of Chromium Complex.....                                                                                                                | 4   |
| 3. Supplementary Synthesis of Substrates .....                                                                                                                     | 11  |
| 4. Supplementary Optimizing Reaction Parameters .....                                                                                                              | 13  |
| 5. Supplementary General Procedure of CAAC-Phosphino-Cr-Catalyzed<br><i>Trans</i> -Selective Hydrogenation of Alkynes for the Synthesis of <i>E</i> -Olefins ..... | 17  |
| 6. Supplementary General Procedure of CAAC-Imino-Cr-Catalyzed <i>Cis</i> -Selective<br>Hydrogenation of Alkynes for the Synthesis of <i>Z</i> -Olefins .....       | 36  |
| 7. Supplementary Reaction Profile for Hydrogenation of 2a.....                                                                                                     | 52  |
| 8. Supplementary Mechanistic Experiments.....                                                                                                                      | 56  |
| 9. Supplementary Synthetic Applications in Accessing Functionalized <i>E</i> - and<br><i>Z</i> -olefin Derivatives .....                                           | 69  |
| 10. Supplementary the Single Crystal Data of the Complex of 1a (CCDC:<br>2015820) .....                                                                            | 75  |
| 11. Supplementary DFT Computational Study .....                                                                                                                    | 89  |
| 12. Supplementary <sup>1</sup> H NMR, <sup>13</sup> C NMR and <sup>19</sup> F NMR Spectra .....                                                                    | 93  |
| 13. Supplementary References.....                                                                                                                                  | 169 |

## 1. Supplementary Methods

### General information

All reactions dealing with air- or moisture-sensitive compounds were carried out in a flame-dried and sealed Schlenk tube under atmosphere of nitrogen. Analytical thin-layer chromatography was performed on glass plates coated with silica gel (0.25 mm, 230–400 mesh) containing a fluorescent indicator (Merck), or phosphomolybdic acid hydrate or  $\text{KMnO}_4$  staining solutions and followed by heating. Flash silica gel column chromatography was performed on silica gel 60 N (spherical and neutral, 140–325 mesh). NMR spectra were measured on a Bruker AVANCE III HD spectrometer and reported in parts per million (ppm).  $^1\text{H}$  NMR spectra were recorded at 400 MHz in  $\text{CDCl}_3$  were referenced internally to tetramethylsilane as standard,  $^{13}\text{C}$  NMR spectra were recorded at 100 MHz and referenced to the solvent resonance.  $^{19}\text{F}$  NMR spectra are not calibrated by an internal reference. Chemical shifts are reported in ppm, relative to solvent residual peaks) and coupling constants  $J$  in Hertz (Hz). Signals are described as s = singlet, d = doublet, dd = doublet of doublets, t = triplet, q = quartet and m = multiplet. Melting points were determined with a Hanon Instruments MP300. Analytical gas chromatography (GC) was carried out on an Agilent Technologies 7890B GC-system, equipped with FID detector and a J&W GC column (0.32 mm  $\times$  30 m  $\times$  0.25  $\mu\text{m}$ ). The methods were used by starting with the injection temperature  $T_0$ ; after holding the related temperature for 3 min, the column was heated to temperature  $T_1$  (ramp). (GC Method:  $T_0 = 50\text{ }^\circ\text{C}$ ,  $T_1 = 280\text{ }^\circ\text{C}$ , ramp =  $15\text{ }^\circ\text{C}/\text{min}$ ). GC–MS spectra were recorded on an Agilent Technologies 7890B GC-system with an Agilent 5977B MSD and a HP–5MS column (0.25 mm  $\times$  30 m  $\times$  0.25  $\mu\text{m}$ ). The major signals are quoted in  $m/z$  with the relative intensity in parentheses. The methods were used by starting with the injection temperature  $T_0$ ; after holding this temperature for 3 min, the column was heated to the temperature  $T_1$  (ramp). (GC–MS Method:  $T_0 = 50\text{ }^\circ\text{C}$ ,  $T_1 = 280\text{ }^\circ\text{C}$ , ramp =  $15\text{ }^\circ\text{C}/\text{min}$ ). High resolution mass spectra (HRMS) were recorded on the Exactive Mass Spectrometer

(Thermo Scientific, USA) equipped with ESI ionization source. X-ray photoelectron spectroscopy (XPS) data were collected with a Thermo Fisher ESCALAB Xi<sup>+</sup> spectrometer equipped with monochromatic Al K $\alpha$  radiation. IR spectra were recorded on a PerkinElmer Spectrum Two spectrometer using transmittance method. Electron paramagnetic resonance (EPR) spectroscopic measurements were performed on the Bruker A300 spectrometer. Elemental analysis (EA) spectroscopic measurements were recorded on the Elementar Vario EL cube.

**Material.** Unless otherwise noted, materials were purchased from Tokyo Chemical Industry Co., Aldrich Inc., Alfa Aesar, Adamas-beta<sup>®</sup>, Energy Chemical and other commercial suppliers and used as received. Solvents were dried over CaH<sub>2</sub> (for DCM, CDCl<sub>3</sub> and MeCN) and sodium (for THF, Toluene and hexane) by refluxing for overnight and freshly distilled prior to use. CrCl<sub>3</sub> (99.99% purity) were purchased from Aldrich Inc. and used as received. Cr(acac)<sub>3</sub> (97% purity), CrCl<sub>2</sub> (99% purity) were purchased from Alfa Aesar and used as received. The alkyne precursors were purchased or prepared according to the known procedures. Alkynes **2a** (98% purity), **2ax** (98% purity), **2ay** (98% purity) were purchased for Energy Chemical Inc. The preparation of CAAC-Cr complexes was performed under atmosphere of nitrogen inside a glovebox. Molecular sieve was activated at high temperature under nitrogen atmosphere before utilization. Glassware and stirrer bars were dried in oven for 24 hours prior to use. Liquid reagents, solutions or solvents were added via syringe or cannula through rubber septa. The selectivity of *E*-olefins relative to *Z*-stereomers was determined by GC analysis or <sup>1</sup>H NMR prior to purification.

## 2. Supplementary Synthesis of Chromium Complex

The related iminium salts **14–16** and **1a–1d** were prepared according to the reported methods in literatures.<sup>1–4</sup>

General procedure for EPR experiments.



The resulting THF solutions bellow (**1a–1d**) were partly transferred into a capillary column (20 cm). The sample was then put into a quartz tube and measured at 77k (Frequency = 9.852947 GHz, Power = 19.00 mW, Field Center = 2750.000 G, Width +/- = 4500.000 G, Sweep Time = 122.88 sec, Modulation Frequency = 100.00 kHz, Amplitude 1.00 G, Time Constant 10.24 msec, Phase 0.00 deg. The EPR spectrum were shown in Supplementary Figure S1-4.

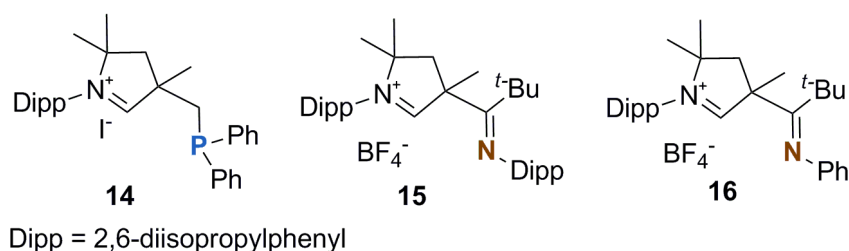

## 2.1 Synthesis of Iminium Salt 14

A dried Schlenk tube was charged with cyclic iminium salt (2.70 g, 5 mmol), diphenylphosphine (1.02 g, 5.5 mmol), *N,N*-diisopropylethylamine (2.58 g, 20 mmol) in THF (10 mL). The mixture was stirred at 100 °C for 48 h. After removal of volatiles under vacuum, K<sub>3</sub>PO<sub>4</sub> (1.27 g, 6 mmol) and MeCN (20 mL) were added and the mixture was stirred at room temperature for 12 h. After removal of solvents under vacuum, the crude product was extracted with CH<sub>2</sub>Cl<sub>2</sub> (30 mL). After removal of the volatiles under vacuum, the resulting yellow solid was washed with THF (60 mL) to afford a white solid powder (1.79g, 60%). <sup>1</sup>H NMR (400 MHz, CDCl<sub>3</sub>): δ 10.77 (s, 1H), 7.62–7.55 (m, 2H), 7.48–7.37 (m, 6H), 7.30–7.15 (m, 5H), 3.13–2.97 (m, 3H), 2.64–2.51 (m, 1H), 2.26 (d, *J* = 14.0 Hz, 1H), 2.13 (d, *J* = 14.0 Hz, 1H), 1.87 (s, 3H), 1.44 (s, 3H), 1.31–1.21 (m, 12H), 1.16 (d, *J* = 6.6 Hz, 3H); <sup>13</sup>C NMR (100 MHz, CDCl<sub>3</sub>): δ 191.5 (d, *J* = 6.3 Hz), 145.1, 144.5, 137.2 (d, *J* = 7.8 Hz), 135.6 (d, *J* = 10.0 Hz), 134.0, 133.8, 132.6, 132.4, 131.9, 130.2, 129.3, 129.3, 128.7, 128.6, 125.4, 125.3, 82.7, 52.9 (d, *J* = 19.0 Hz), 46.5 (d, *J* = 6.5 Hz), 37.5 (d, *J* = 15.4 Hz), 30.0 (d, *J* = 7.3 Hz), 29.9, 29.7, 28.7, 28.6, 27.7, 27.6, 22.2, 21.8; <sup>31</sup>P NMR (162 MHz, CDCl<sub>3</sub>): δ –19.0.

## 2.2 Synthesis of CAAC Iminium Salt 15

In a dried Schlenk tube, *N*-diisopropylphenylpivalimidoyl chloride (2.79 g, 10 mmol), 1-(2,6-diisopropylphenyl)-2,2,4-trimethyl-2,3-dihydro-1*H*-pyrrole (2.71 g, 10 mmol), NaBF<sub>4</sub> (1.21 g, 11 mmol) and MeCN (10 mL) were added under nitrogen atmosphere. After the mixture was stirred at room temperature for 12 h, K<sub>3</sub>PO<sub>4</sub> (1.06 g, 5 mmol) was added and the mixture was stirred for 12 h. The CH<sub>3</sub>CN solution was filtered and the solvent was removed under vacuum. The crude product was extracted with CH<sub>2</sub>Cl<sub>2</sub> (30 mL). After removal of CH<sub>2</sub>Cl<sub>2</sub>, the yellow solid was washed with Et<sub>2</sub>O (100 mL) to afford a white solid powder (4.87g, 81%). <sup>1</sup>H NMR (400 MHz, CDCl<sub>3</sub>): δ = 8.45 (s, 1H), 7.52 (t, *J* = 8.0 Hz, 1H), 7.33 (d, *J* = 7.2 Hz, 1H), 7.28–7.26 (m, 1H), 7.03 (s, 3H), 3.12 (d, *J* = 13.6 Hz, 1H), 2.86–2.74 (m, 5H), 2.22 (s, 3H), 1.68 (s, 3H), 1.56 (s, 3H), 1.35 (d, *J* = 6.8 Hz, 3H), 1.31–1.26 (m, 6H), 1.23–1.18 (m, 18H), 0.97 (d, *J* = 6.8 Hz, 3H), 0.66 (d, *J* = 6.8 Hz, 3H); <sup>13</sup>C NMR (100 MHz, CDCl<sub>3</sub>): δ = 183.5, 182.5, 145.5, 145.4, 143.4, 134.8, 134.5, 131.9, 128.6, 125.7, 125.3, 124.2, 123.2, 122.8, 83.0, 64.4, 49.8, 43.5, 29.7, 29.4, 29.0, 28.7, 28.5, 27.9, 26.5, 26.2, 24.7, 24.6, 23.8, 22.9, 22.4, 22.2, 21.9.

## 2.3 Synthesis of CAAC Iminium Salt 16

In a dried Schlenk tube, *N*-phenylpivalimidoyl chloride (1.95 g, 10 mmol), 1-(2,6-diisopropylphenyl)-2,2,4-trimethyl-2,3-dihydro-1*H*-pyrrole (2.71 g, 10 mmol), NaBF<sub>4</sub> (1.21 g, 11 mmol) and MeCN (10 mL) were added under nitrogen atmosphere. After the mixture was stirred at room temperature for 12 h, K<sub>3</sub>PO<sub>4</sub> (1.06 g, 5 mmol) was added and the mixture was stirred for another 12 h. The CH<sub>3</sub>CN solution was filtered and the solvent was removed under vacuum. The crude product was extracted with CH<sub>2</sub>Cl<sub>2</sub> (30 mL). After removal of CH<sub>2</sub>Cl<sub>2</sub>, the yellow solid was washed with Et<sub>2</sub>O (100 mL) to afford a white solid powder (3.53g, 68%). <sup>1</sup>H NMR (400 MHz, CDCl<sub>3</sub>): δ 8.84 (s, 1H), 7.47 (t, *J* = 7.8 Hz, 1H), 7.32–7.21 (m, 4H), 7.03 (t, *J* = 7.4 Hz, 1H), 6.86 (s, 2H), 3.09 (d, *J* = 14.2 Hz, 1H), 3.00–2.89 (m, 1H), 2.75–2.58 (m, 2H),

2.06 (s, 3H), 1.65 (s, 3H), 1.55 (s, 3H), 1.37 (d,  $J = 6.8$  Hz, 3H), 1.28 (s, 9H), 1.17–1.11 (m, 6H), 0.48 (d,  $J = 6.4$  Hz, 3H);  $^{13}\text{C}$  NMR (100 MHz,  $\text{CDCl}_3$ ):  $\delta$  184.0, 183.2, 148.1, 146.0, 145.3, 131.5, 129.0, 128.7, 125.5, 124.9, 123.5, 117.8, 82.1, 62.7, 46.9, 42.6, 30.4, 29.9, 29.2, 27.7, 27.0, 26.1, 26.0, 23.3, 22.1, 21.8.

## 2.4 Synthesis of CAAC-Cr Complex **1a**

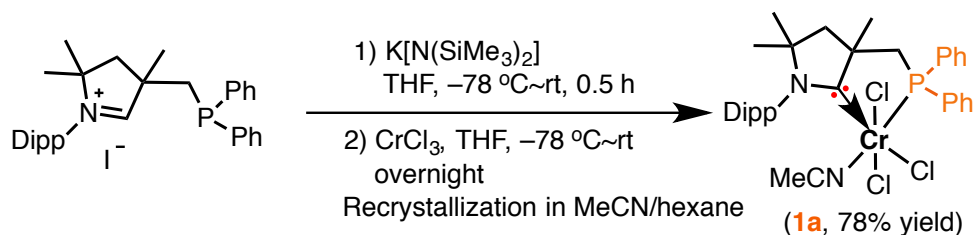

In a dried Schlenk tube, iminium salt **14** (597 mg, 1 mmol) was added under nitrogen atmosphere. After addition of THF (10 mL) by syringe at  $-78\text{ }^\circ\text{C}$ , a solution of KHMDS (1.1 mL, 1.1 mmol, 1 M/L in THF) was added dropwise by syringe and stirred at room temperature for 0.5 h. The solution was transferred to a dry Schlenk tube containing  $\text{CrCl}_3$  (158 mg, 1 mmol) under atmosphere of nitrogen at  $-78\text{ }^\circ\text{C}$  and stirred at room temperature for overnight. After removal of volatiles under vacuum, the solid was then extracted with DCM (20 mL). After removal of DCM, the solid was washed with hexane (30 mL) to afford a dark green powder. Single crystals of **1a** suitable for X-ray crystallography was obtained by recrystallization from hexane to acetonitrile at  $-30\text{ }^\circ\text{C}$  (520 mg, 78%). IR (neat)  $\nu$  3370, 2964, 1616, 1412, 1251, 1033, 856, 606, 558  $\text{cm}^{-1}$ . HRMS (ESI,  $m/z$ ): calcd for  $\text{C}_{32}\text{H}_{40}\text{Cl}_2\text{CrN}_1\text{P}$   $[\text{M}-\text{Cl}-\text{MeCN}]^+$ : 591.1681, found: 591.1675. Elemental analysis (calcd., found for  $\text{C}_{34}\text{H}_{43}\text{Cl}_3\text{CrN}_2\text{P}$ ): C (61.04, 61.03), H (6.48, 6.41), N (4.19, 4.77).

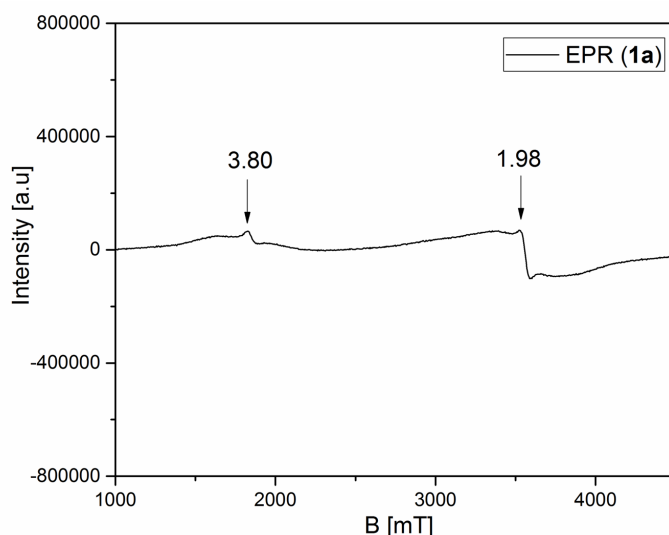

**Supplementary Figure S1. EPR spectrum of 1a in THF (77 K)**

## 2.5 Synthesis of CAAC-Cr Complex **1b**<sup>2</sup>

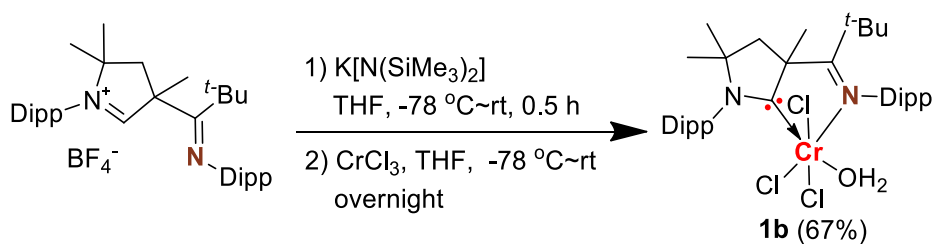

In a dried Schlenk tube, CAAC iminium salt **15** (602 mg, 1 mmol) was added under nitrogen atmosphere. After addition of THF (10 mL) by syringe at  $-78\text{ }^{\circ}\text{C}$ , a solution of KHMDS (1.1 mL, 1.1 mmol, 1 M/L in THF) was added dropwise by syringe and stirred at room temperature for 0.5 h. The solution was transferred to a dry Schlenk tube containing  $\text{CrCl}_3$  (158 mg, 1 mmol) at  $-78\text{ }^{\circ}\text{C}$  under atmosphere of nitrogen and stirred overnight at room temperature. After removal of volatiles under vacuum, the solid was extracted with DCM (20 mL). After removal of DCM, the solid was washed with hexane (30 mL) to afford a celadon powder (462 mg, 67%). IR (neat)  $\nu$  3740, 3418, 3152, 2969, 2876, 1636, 1466, 1406, 1034, 805, 526  $\text{cm}^{-1}$ . Elemental analysis calcd (calcd., found for  $\text{C}_{36}\text{H}_{56}\text{Cl}_3\text{CrN}_2\text{O}$ ): C (62.56, 62.25), H (8.17, 8.20), N (4.05, 4.03).

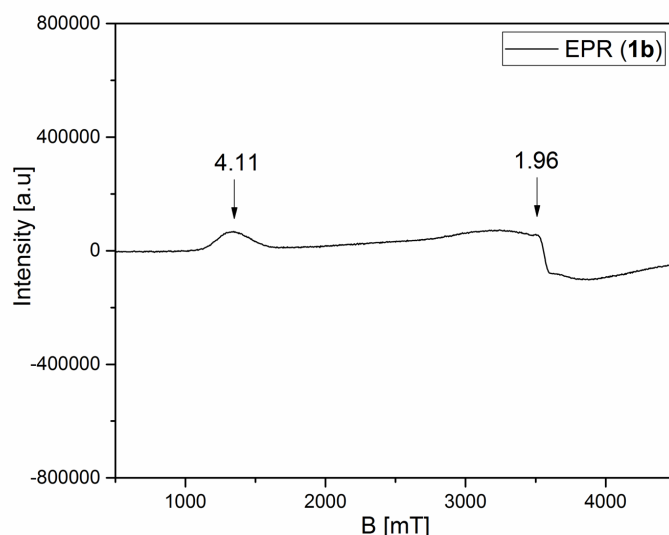

**Supplementary Figure S2. EPR spectrum of 1b in THF (77 K)**

## 2.6 Synthesis of CAAC-Cr Complex 1c

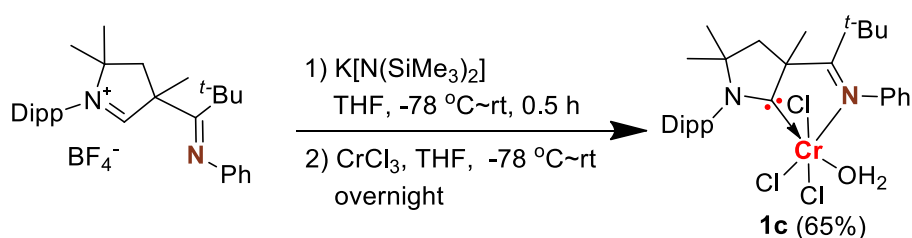

In a dried Schlenk tube, CAAC iminium salts **16** (518 mg, 1 mmol) was added under nitrogen atmosphere. After addition of THF (10 mL) by syringe at  $-78\text{ }^{\circ}\text{C}$ , a solution of KHMDS (1.1 mL, 1.1 mmol, 1 M/L in THF) was added dropwise by syringe and stirred at room temperature for 0.5 h. The solution was transferred to a dry Schlenk tube containing  $\text{CrCl}_3$  (158 mg, 1 mmol) at  $-78\text{ }^{\circ}\text{C}$  under atmosphere of nitrogen and stirred overnight at room temperature. After removal of volatiles under vacuum, the solid was extracted with DCM (20 mL). After removal of DCM, the solid was washed with hexane (30 mL) to afford a green powder (393 mg, 65%). IR (neat)  $\nu$  3737, 3627, 3072, 2965, 2873, 1606, 1469, 1304, 805, 529  $\text{cm}^{-1}$ . HRMS (ESI,  $m/z$ ) calcd for  $\text{C}_{30}\text{H}_{42}\text{CrN}_2\text{Na} [\text{M}-3\text{Cl}-\text{H}_2\text{O}+\text{Na}]^+$ : 505.2645, found: 505.2659. Elemental analysis (calcd., found for  $\text{C}_{30}\text{H}_{44}\text{Cl}_3\text{CrN}_2\text{O}$ ): C (59.36, 59.05), H (7.31, 7.51), N (4.61, 4.28).

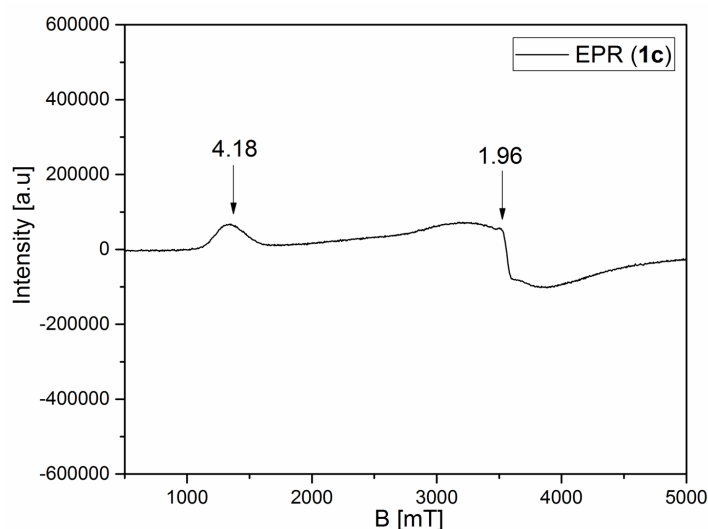

**Supplementary Figure S3. EPR spectrum for 1c in THF (77 K)**

## 2.4 Synthesis of Cr Complex **1d**<sup>3</sup>

In a dried Schlenk tube, 4,4'-Di-tert-butyl-2,2'-bipyridine (268 mg, 1 mmol) and  $\text{CrCl}_3 \cdot (\text{THF})_3$  (373 mg, 1 mmol) were added under nitrogen atmosphere. After addition of MeCN (3 mL) and sonicated for 1 min. After removal of volatiles under vacuum, the solid was then extracted with hot THF (50 mL). The resultant cloudy solution was filtered through Celite and concentrated down to half its volume. Single crystals of **1d** suitable for X-ray crystallography was obtained by recrystallization from pentane to THF. The supernatant was discarded, and the crystals were washed with pentane and dried under reduced pressure to give the Cr complex **1d** (230 mg, 52%). IR (neat)  $\nu$  3757, 3373, 3054, 2973, 2928, 1621, 1468, 1383, 743, 695, 519  $\text{cm}^{-1}$ . Elemental analysis (calcd., found for  $\text{C}_{18}\text{H}_{26}\text{Cl}_3\text{CrN}_2\text{O}$ ): C (48.61, 49.26), H (5.89, 5.76), N (6.30, 6.27).

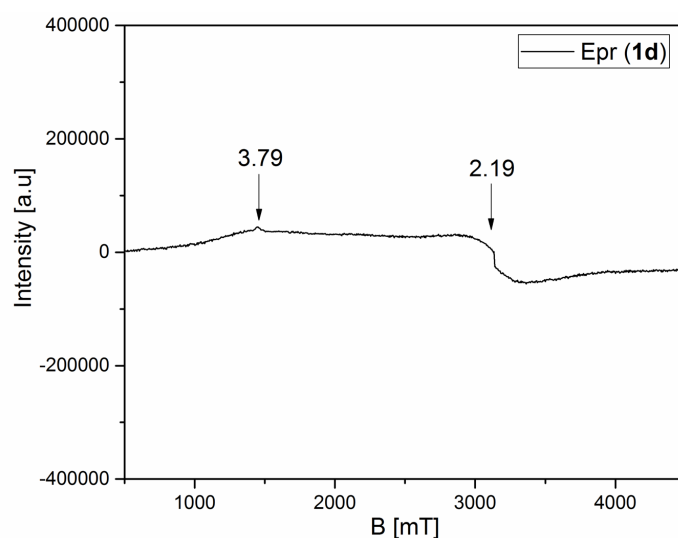

**Supplementary Figure S4. EPR spectrum for 1d in THF (77 K)**

### 3. Supplementary Synthesis of Substrates

#### Method A<sup>5</sup>

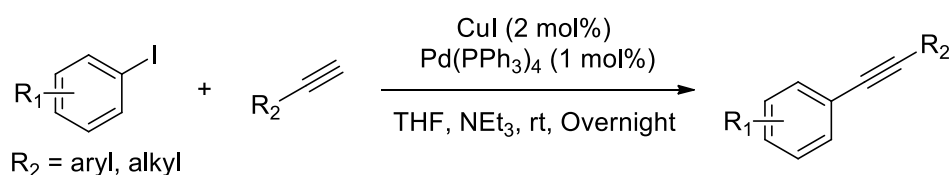

**2b-2x, 2aj-2aw 2az** and **8** were synthesized according to Method A. A mixture of iodobenzene (5 mmol), terminal alkyne (6 mmol), CuI (20 mg, 2 mol %) and Pd(PPh<sub>3</sub>)<sub>4</sub> (58 mg, 1 mol %) was added to an over dried tube under atmosphere of nitrogen. THF (5 mL) and NEt<sub>3</sub> (5 mL) was then added by syringe. The mixture was stirred at room temperature for 12 h. The reaction mixture was diluted with ethyl acetate, and washed with saturated solution of sodium chloride. The organic layer was separated, dried and concentrated under vacuum. The crude product was purified by column chromatography on silica gel to afford the related alkynes.

### Method B<sup>6</sup>

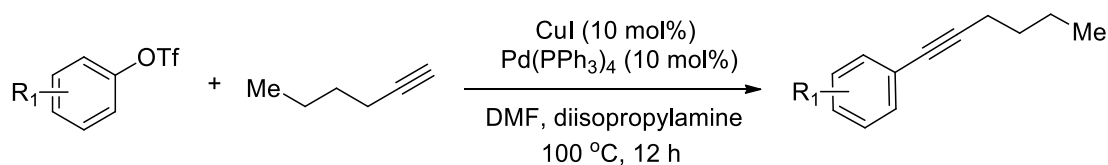

**10** and **12** were synthesized according to Method B. To an over dried 25 mL two-necked flask, aryl triflyl (2 mmol), 1-hexyne (197 mg), CuI (38 mg, 10 mol %), Pd(PPh<sub>3</sub>)<sub>4</sub> (230 mg, 10 mol %), diisopropylamine (607 mg, 3 equiv) and DMF (24 mL) were added under argon atmosphere. The mixture was stirred at 100 °C for 12 h. The reaction mixture was diluted with ethyl acetate, and washed with saturated solution of sodium chloride. The organic layer was separated, dried and concentrated under vacuum. The crude product was purified by column chromatography on silica gel to give the desired alkynes.

### Method C<sup>7</sup>

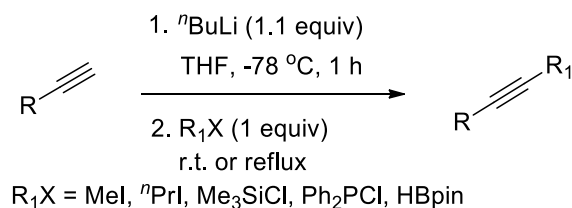

To an over dried 100 mL two-necked flask, alkynes (10 mmol) and THF (30 mL) were added under argon atmosphere. After the addition of <sup>n</sup>BuLi (11 mmol, 2.5 M in hexane) by syringe at -78 °C, the mixture was stirred for 1 h. Subsequently R<sub>1</sub>X was added and stirred at -78 °C for another 1 h, the mixture was warmed to room temperature or reflux for 12 h. The reaction was then quenched with HCl<sub>aq</sub> (3 M), diluted with ethyl acetate and washed with saturated solution of sodium chloride. The organic layer was dried by anhydrous Na<sub>2</sub>SO<sub>4</sub> and concentrated under vacuum. The crude product was purified by column chromatography on silica gel to give the desired alkynes. Alkynes of **2y–2ah** and **2ba–2ac** were prepared according to this procedure.



## 4. Supplementary Optimizing Reaction Parameters

**Supplementary Table S1. Studying the Effect of Chromium Complexes on the *Trans*-Selective Alkyne Hydrogenation for Synthesis of *E*-olefin<sup>a</sup>**

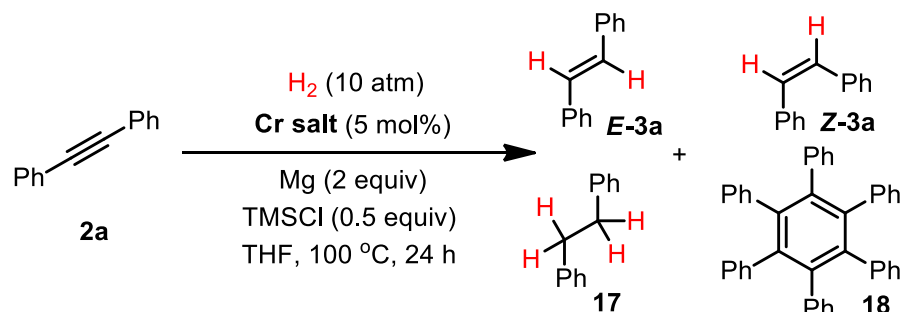

| Entry | [Cr]                       | Yield<br>( <i>E</i> -3a+ <i>Z</i> -3a) | Selectivity<br>( <i>E/Z</i> ) <sup>b</sup> | Yield<br>( <b>17</b> ) | Yield<br>( <b>18</b> ) |
|-------|----------------------------|----------------------------------------|--------------------------------------------|------------------------|------------------------|
| 1     | <b>1a</b>                  | 88%                                    | 99:1                                       | 8%                     | nd                     |
| 2     | <b>1b</b>                  | 61%                                    | 1:99                                       | nd                     | 10%                    |
| 3     | <b>1c</b>                  | 6%                                     | 13:87                                      | nd                     | nd                     |
| 4     | <b>1d</b>                  | 60%                                    | 87:13                                      | nd                     | 13%                    |
| 5     | $\text{CrCl}_3$            | 75%                                    | 64:36                                      | nd                     | nd                     |
| 6     | $\text{Cr}(\text{acac})_3$ | 74%                                    | 90:10                                      | nd                     | nd                     |
| 7     | –                          | nd                                     | –                                          | nd                     | nd                     |

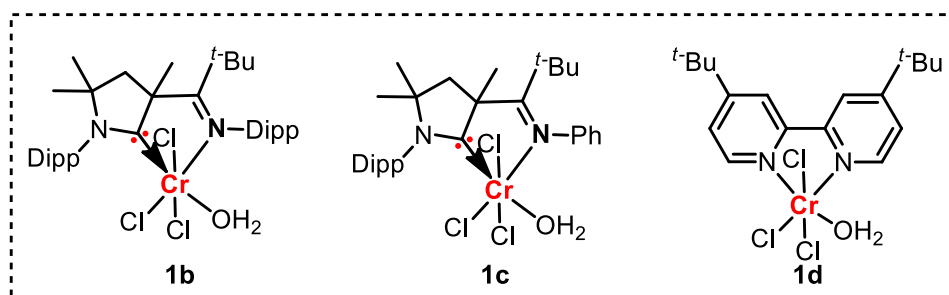

<sup>a</sup>Reaction conditions: Cr complex (5 mol %), **2a** (0.2 mmol), Mg (2 equiv), TMSCl (0.5 equiv), THF (2 mL),  $\text{H}_2$  (10 atm), 100 °C, 24 h. GC yields were determined by using mesitylene as an internal standard. <sup>b</sup>The selectivity (*E/Z*) was determined by GC analysis prior to purification.

**Supplementary Table S2. Studying the Effect of the Amounts of Mg, TMSCl and Temperature on the *Trans*-Selective Alkyne Hydrogenation for Synthesis of *E*-olefin<sup>a</sup>**

Reaction scheme: Diphenylacetylene (**2a**) reacts with  $\text{H}_2$  (10 atm), **1a** (5 mol%), Mg, TMSCl in THF at temperature  $t$  °C for 24 h to produce *E*-3a, *Z*-3a, and **17**.

| Entry           | Mg (equiv) | TMSCl (equiv) | Temperature (°C) | Yield ( <i>E</i> -3a+ <i>Z</i> -3a) | Selectivity ( <i>E/Z</i> ) <sup>b</sup> | Yield ( <b>17</b> ) |
|-----------------|------------|---------------|------------------|-------------------------------------|-----------------------------------------|---------------------|
| 1               | 2.5        | 1             | 90               | 76%                                 | 99:1                                    | 15%                 |
| 2               | 2.5        | none          | 90               | nd                                  | —                                       | nd                  |
| 3               | 2.5        | 0.2           | 90               | 54%                                 | 99:1                                    | nd                  |
| 4               | 2.5        | 0.5           | 90               | 75%                                 | 99:1                                    | nd                  |
| 5               | 2.5        | 0.5           | 100              | 88%                                 | 99:1                                    | 13%                 |
| 6               | none       | 0.5           | 100              | nd                                  | —                                       | nd                  |
| 7               | 0.2        | 0.5           | 100              | trace                               | 77:23                                   | nd                  |
| 8               | 0.5        | 0.5           | 100              | 57%                                 | 87:13                                   | nd                  |
| 9               | 1          | 0.5           | 100              | 72%                                 | 90:10                                   | nd                  |
| 10              | 1.5        | 0.5           | 100              | 82%                                 | 79:21                                   | nd                  |
| 11              | 2          | 0.5           | 100              | 89% (85%) <sup>c</sup>              | 99:1                                    | 8%                  |
| 12 <sup>d</sup> | 2          | 0.5           | 100              | nd                                  | -                                       | nd                  |
| 13 <sup>e</sup> | 2          | 0.5           | 100              | nd                                  | -                                       | nd                  |

<sup>a</sup>Reaction conditions: **1a** (5 mol %), **2a** (0.2 mmol), Mg (x equiv), TMSCl (x equiv), THF (2 mL),  $\text{H}_2$  (10 atm),  $T$  °C, 24 h. GC yields were determined by using mesitylene as internal standard. <sup>b</sup>The selectivity (*Z/E*) was determined by GC analysis prior to purification. <sup>c</sup>Isolated yield in parenthesis. <sup>d</sup>Manganese powder was used instead of magnesium. <sup>e</sup>Zinc powder was used instead of magnesium.

**Supplementary Table S3. Studying the Effect of Chromium Complexes on the *Cis*-Selective Alkyne Hydrogenation for Synthesis of *Z*-olefin<sup>a</sup>**

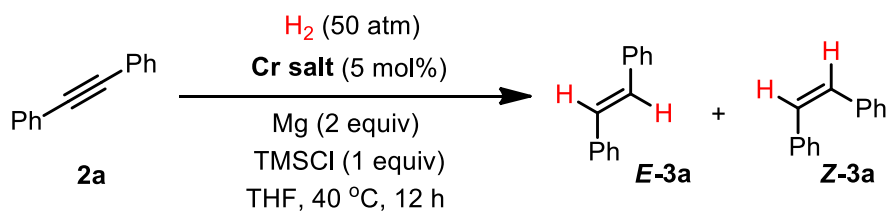

| Entry | [Cr]                       | Yield<br>( <b>Z-3a</b> + <b>E-3a</b> ) | Selectivity<br>( <i>Z/E</i> ) <sup>b</sup> | Recovery<br>( <b>2a</b> ) |
|-------|----------------------------|----------------------------------------|--------------------------------------------|---------------------------|
| 1     | <b>1a</b>                  | 25%                                    | 79:21                                      | 56%                       |
| 2     | <b>1b</b>                  | 67%                                    | 87:13                                      | 24%                       |
| 3     | <b>1c</b>                  | 53%                                    | 68:32                                      | 39%                       |
| 4     | <b>1d</b>                  | 35%                                    | 72:28                                      | 46%                       |
| 5     | $\text{CrCl}_3$            | 34%                                    | 77:23                                      | 59%                       |
| 6     | $\text{Cr}(\text{acac})_3$ | trace                                  | 23:77                                      | 98%                       |
| 7     | –                          | nd                                     | –                                          | 99%                       |

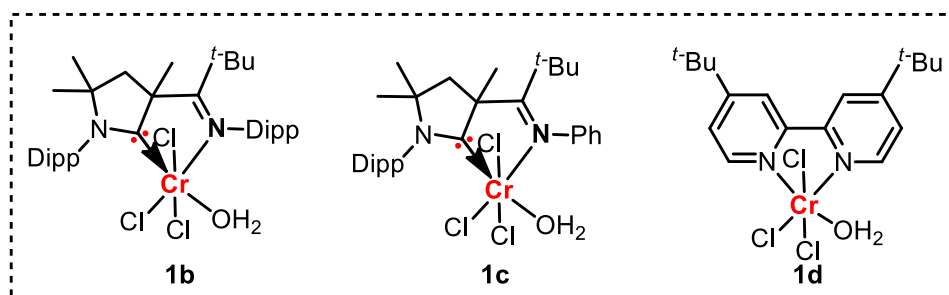

<sup>a</sup>Reaction conditions: Cr complex (5 mol %), **2a** (0.2 mmol), Mg (2 equiv), TMSCl (1 equiv), THF (2 mL),  $\text{H}_2$  (50 atm), 40 °C, 12 h. GC yields were determined by using mesitylene as internal standard. <sup>b</sup>The selectivity (*Z/E*) was determined by GC analysis prior to purification.

**Supplementary Table S4. Studying the Effect of the Amounts of Mg, TMSCl and Additive on the *Cis*-Selective Alkyne Hydrogenation for Synthesis of *Z*-olefin<sup>a</sup>**

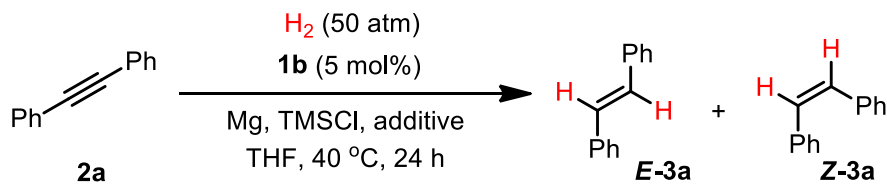

| Entry           | Mg (equiv) | TMSCl (equiv) | Additive (mg)          | Yield (Z-3a+E-3a)      | Recovery (2a) | Selectivity (Z/E) <sup>b</sup> |
|-----------------|------------|---------------|------------------------|------------------------|---------------|--------------------------------|
| 1               | 2.5        | 1             | 4 Å MS (150)           | 90%                    | nd            | 89:11                          |
| 2               | 2.5        | 1             | SiO <sub>2</sub> (150) | 84%                    | 9%            | 84:16                          |
| 3               | 2          | 1             | 4 Å MS (150)           | 89%                    | nd            | 89:11                          |
| 4               | 1.5        | 1             | 4 Å MS (150)           | 87%                    | 5%            | 87:13                          |
| 5               | 1          | 1             | 4 Å MS (150)           | 80%                    | 16%           | 92:8                           |
| 6               | 0.5        | 1             | 4 Å MS (150)           | 61%                    | 37%           | 93:7                           |
| 7               | 0.2        | 1             | 4 Å MS (150)           | trace                  | 97%           | 35:65                          |
| 8               | none       | 1             | 4 Å MS (150)           | nd                     | 99%           | —                              |
| 9               | 2          | none          | 4 Å MS (150)           | nd                     | 99%           | —                              |
| 10              | 2          | 0.5           | 4 Å MS (150)           | 30%                    | 66%           | 92:8                           |
| 11              | 2          | 1.5           | 4 Å MS (150)           | 67%                    | nd            | 88:12                          |
| 12              | 2          | 1             | 4 Å MS (25)            | 88% (86%) <sup>e</sup> | nd            | 93:7                           |
| 13              | 2          | 1             | 4 Å MS (50)            | 87%                    | nd            | 90:10                          |
| 14 <sup>c</sup> | 2          | 1             | 4 Å MS (50)            | 90%                    | nd            | 89:11                          |
| 15 <sup>d</sup> | 2          | 1             | 4 Å MS (25)            | 90%                    | nd            | 70:30                          |
| 16 <sup>f</sup> | 2          | 1             | 4 Å MS (25)            | nd                     | 97%           | -                              |
| 17 <sup>g</sup> | 2          | 1             | 4 Å MS (25)            | nd                     | 96%           | -                              |

<sup>a</sup>Reaction conditions: **1b** (5 mol %), **2a** (0.2 mmol), Mg (X equiv), TMSCl (X equiv), Additive (X mg), THF (2 mL), H<sub>2</sub> (50 atm), 40 °C, 24 h. GC yields were determined by using mesitylene as an internal standard. <sup>b</sup>The selectivity (Z/E) was determined by GC analysis prior to purification. <sup>c</sup>60 °C. <sup>d</sup>**1c** (5 mol%). <sup>e</sup>Isolated yield in parenthesis. <sup>f</sup>Manganese powder was used instead of magnesium. <sup>g</sup>Zinc powder was used instead of magnesium.

## 5. Supplementary General Procedure of CAAC-Phosphino-Cr-Catalyzed *Trans*-Selective Hydrogenation of Alkynes for the Synthesis of *E*-Olefins

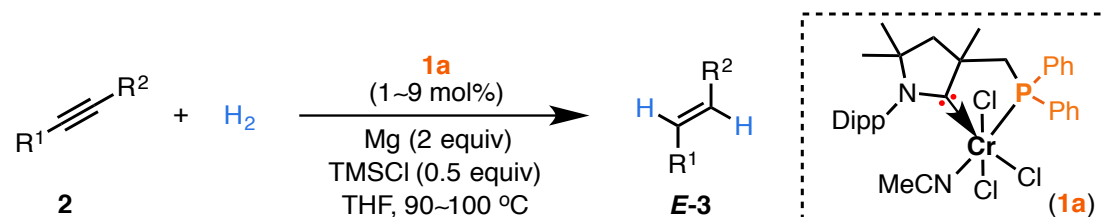

In a Schlenk tube were placed alkyne **2** (0.2 mmol), **1a** (1~9 mol %), Mg (10 mg), TMSCl (13  $\mu$ L) and THF (2 mL) under atmosphere of nitrogen. The tube was quickly moved to a high-pressure autoclave, and stirred under atmosphere of H<sub>2</sub> (10 atm) at 90~100 °C for 24 h. After quenching with HCl<sub>aq</sub> (2 mL, 1 M), the crude product was extracted with ethyl acetate (3  $\times$  4 mL). The combined organic phases were dried over anhydrous Na<sub>2</sub>SO<sub>4</sub> and concentrated under vacuum. The stereoselectivity of *E*-olefin relative to *Z*-stereomer was determined by GC analysis or <sup>1</sup>H NMR prior to purification. The crude product was purified by silica gel chromatography to afford the related olefin compound.

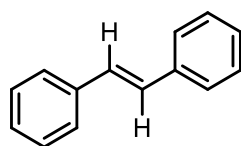

### (*E*)-1,2-diphenylethene (**E-3a**)

The general procedure was applied to **1a** (6 mg, 0.01 mmol, 5 mol %), 1,2-diphenylethyne **2a** (36 mg, 0.2 mmol), Mg (10 mg), TMSCl (13  $\mu$ L) and THF (2 mL). The reaction mixture was stirred under H<sub>2</sub> (10 atm) at 100 °C for 24 h. Then the resulting crude product was purified by column chromatography on silica gel with (PE:EA = 100:1) to afford the title compound as a white solid (31 mg, 85% yield, *E*:*Z* > 99:1). <sup>1</sup>H NMR (400 MHz, CDCl<sub>3</sub>):  $\delta$  7.54–7.47 (m, 4H), 7.39–7.30 (m, 4H), 7.28–7.22 (m, 2H), 7.10 (s, 2H); <sup>13</sup>C NMR (100 MHz, CDCl<sub>3</sub>):  $\delta$  137.5, 128.8, 128.8, 127.8, 126.7. Spectroscopic data are in accordance with those described in the literature.<sup>5</sup>

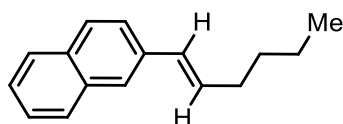

**(*E*)-2-(hex-1-en-1-yl)naphthalene (*E*-3b)**

The general procedure was applied to **1a** (1 mg, 0.002 mmol, 1 mol %), 2-(hex-1-yn-1-yl)naphthalene **2b** (42 mg, 0.2 mmol), Mg (10 mg), TMSCl (13  $\mu$ L) and THF (2 mL). The reaction mixture was stirred under H<sub>2</sub> (10 atm) at 90 °C for 24 h. Then the resulting crude product was purified by column chromatography on silica gel with (PE:EA = 100:1) to afford the title compound as a colorless oil (37 mg, 88% yield, *E*:*Z* = 99:1). <sup>1</sup>H NMR (400 MHz, CDCl<sub>3</sub>):  $\delta$  7.81–7.73 (m, 3H), 7.68 (s, 1H), 7.61–7.55 (m, 1H), 7.47–7.37 (m, 2H), 6.55 (d, *J* = 15.6 Hz, 1H), 6.37 (dt, *J* = 15.6, 6.8 Hz, 1H), 2.32–2.23 (m, 2H), 1.55–1.46 (m, 2H), 1.46–1.36 (m, 2H), 0.96 (t, *J* = 7.2 Hz, 3H). <sup>13</sup>C NMR (100 MHz, CDCl<sub>3</sub>):  $\delta$  135.6, 133.9, 132.8, 131.9, 13.0, 128.2, 128.0, 127.8, 126.2, 125.5, 125.4, 123.7, 33.0, 31.7, 22.5, 14.1. Spectroscopic data are in accordance with those described in the literature.<sup>8</sup>

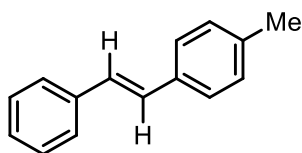

**(*E*)-1-methyl-4-styrylbenzene (*E*-3c)**

The general procedure was applied to **1a** (4 mg, 0.006 mmol, 3 mol %), 1-methyl-4-(phenylethynyl)benzene **2c** (38 mg, 0.2 mmol), Mg (10 mg), TMSCl (13  $\mu$ L) and THF (2 mL). The reaction mixture was stirred under H<sub>2</sub> (10 atm) at 90 °C for 24 h. Then the resulting crude product was purified by column chromatography on silica gel with (PE:EA = 100:1) to afford the title compound as a white solid (28 mg, 73% yield, *E*:*Z* > 99:1). <sup>1</sup>H NMR (400 MHz, CDCl<sub>3</sub>):  $\delta$  7.52–7.47 (m, 2H), 7.41 (d, *J* = 8.0 Hz, 2H), 7.37–7.31 (m, 2H), 7.26–7.21 (m, 1H), 7.16 (d, *J* = 8.0 Hz, 2H), 7.10 (d, *J* = 16.4 Hz, 1H), 7.04 (d, *J* = 16.4 Hz, 1H), 2.35 (s, 3H). <sup>13</sup>C NMR (100 MHz, CDCl<sub>3</sub>):  $\delta$  137.7, 134.7, 129.5, 128.8, 128.8, 127.8, 127.5, 126.6, 126.5, 21.4.

Spectroscopic data are in accordance with those described in the literature.<sup>5</sup>

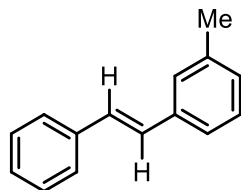

**(*E*)-1-methyl-3-styrylbenzene (*E*-3d)**

The general procedure was applied to **1a** (3 mg, 0.005 mmol, 2.5 mol %), 1-methyl-3-(phenylethynyl)benzene **2d** (38 mg, 0.2 mmol), Mg (10 mg), TMSCl (13  $\mu$ L) and THF (2 mL). The reaction mixture was stirred under H<sub>2</sub> (10 atm) at 90 °C for 24 h. Then the resulting crude product was purified by column chromatography on silica gel with (PE:EA = 100:1) to afford the title compound as a white solid (29 mg, 75% yield, *E*:*Z* = 97:3). <sup>1</sup>H NMR (400 MHz, CDCl<sub>3</sub>):  $\delta$  7.55–7.47 (m, 2H), 7.39–7.30 (m, 4H), 7.28–7.21 (m, 2H), 7.14–7.0 (m, 2H), 2.38 (s, 3H); <sup>13</sup>C NMR (100 MHz, CDCl<sub>3</sub>):  $\delta$  138.4, 137.6, 137.4, 128.9, 128.8, 128.7, 128.6, 128.6, 127.7, 127.4, 126.6, 123.9, 21.6. Spectroscopic data are in accordance with those described in the literature.<sup>5</sup>

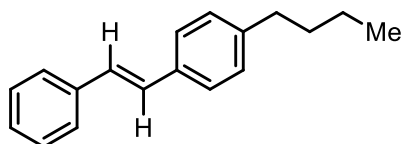

**(*E*)-1-butyl-4-styrylbenzene (*E*-3e)**

The general procedure was applied to **1a** (4 mg, 0.006 mmol, 3 mol %), 1-butyl-4-(phenylethynyl)benzene **2e** (47 mg, 0.2 mmol), Mg (10 mg), TMSCl (13  $\mu$ L) and THF (2 mL). The reaction mixture was stirred under H<sub>2</sub> (10 atm) at 90 °C for 24 h. Then the resulting crude product was purified by column chromatography on silica gel with (PE:EA = 100:1) to afford the title compound as a white solid (37 mg, 79% yield, *E*:*Z* > 99:1). <sup>1</sup>H NMR (400 MHz, CDCl<sub>3</sub>):  $\delta$  7.50 (d, *J* = 7.4 Hz, 2H), 7.43 (d, *J* = 8.0 Hz, 2H), 7.35 (t, *J* = 7.6 Hz, 2H), 7.27–7.23 (m, 1H), 7.17 (d, *J* = 8.0 Hz, 2H),

7.10 (d,  $J = 16.4$  Hz, 1H), 7.05 (d,  $J = 16.4$  Hz, 1H), 2.61 (t,  $J = 7.6$  Hz, 2H), 1.68–1.56 (m, 2H), 1.41–1.31 (m, 2H), 0.93 (t,  $J = 7.2$  Hz, 3H);  $^{13}\text{C}$  NMR (100 MHz,  $\text{CDCl}_3$ ):  $\delta$  142.8, 137.7, 134.9, 128.9, 128.8, 128.8, 127.9, 127.5, 126.6, 126.5, 35.6, 33.7, 22.5, 14.1. Spectroscopic data are in accordance with those described in the literature.<sup>9</sup>

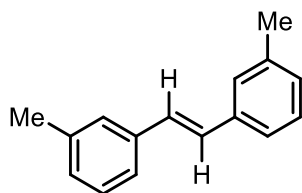

**(*E*)-1,2-di-*m*-tolylethene (*E*-3f)**

The general procedure was applied to **1a** (4 mg, 0.006 mmol, 3 mol %), 1,2-di-*m*-tolylethyne **2f** (41 mg, 0.2 mmol), Mg (10 mg), TMSCl (13  $\mu\text{L}$ ) and THF (2 mL). The reaction mixture was stirred under  $\text{H}_2$  (10 atm) at 90 °C for 24 h. Then the resulting crude product was purified by column chromatography on silica gel with (PE:EA = 100:1) to afford the title compound as a white solid (35 mg, 84% yield, *E*:*Z* > 99:1).  $^1\text{H}$  NMR (400 MHz,  $\text{CDCl}_3$ ):  $\delta$  7.24 (d,  $J = 10.4$  Hz, 4H), 7.20–7.14 (m, 2H), 7.02–6.97 (m, 4H), 2.30 (s, 6H).  $^{13}\text{C}$  NMR (100 MHz,  $\text{CDCl}_3$ ):  $\delta$  138.3, 137.5, 128.7, 128.7, 128.5, 127.3, 123.8, 21.6, 1.2. Spectroscopic data are in accordance with those described in the literature.<sup>10</sup>

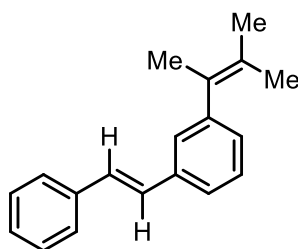

**(*E*)-1-(3-methylbut-2-en-2-yl)-3-styrylbenzene (*E*-3g)**

The general procedure was applied to **1a** (5 mg, 0.008 mmol, 4 mol %), 1-(3-methylbut-2-en-2-yl)-3-(phenyleth-ynyl)benzene **2g** (49 mg, 0.2 mmol), Mg (10



mg), TMSCl (13  $\mu$ L) and THF (2 mL). The reaction mixture was stirred under H<sub>2</sub> (10 atm) at 90 °C for 24 h. Then the resulting crude product was purified by column chromatography on silica gel with (PE:EA = 100:1) to afford the title compound as a white solid (42 mg, 85% yield, *E:Z* = 99:1). mp. = 66–68 °C. <sup>1</sup>H NMR (400 MHz, CDCl<sub>3</sub>):  $\delta$  7.51 (d, *J* = 7.4 Hz, 2H), 7.46 (d, *J* = 8.2 Hz, 2H), 7.35 (t, *J* = 7.6 Hz, 2H), 7.27–7.21 (m, 1H), 7.16–7.07 (m, 4H), 1.97 (s, 3H), 1.82 (s, 3H), 1.63 (s, 3H); <sup>13</sup>C NMR (100 MHz, CDCl<sub>3</sub>):  $\delta$  145.0, 137.7, 135.0, 129.8, 129.0, 128.8, 128.8, 128.1, 127.8, 127.6, 126.6, 126.3, 22.3, 20.8, 20.7. HRMS (ESI, *m/z*): calcd for C<sub>19</sub>H<sub>21</sub> [M+H]<sup>+</sup>: 249.1638, found: 249.1637.

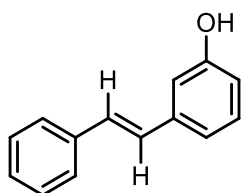

**(*E*)-3-styrylphenol (*E*-3h)**

The general procedure was applied to **1a** (6 mg, 0.01 mmol, 5 mol %), 3-(phenylethynyl)phenol **2h** (39 mg, 0.2 mmol), Mg (10 mg), TMSCl (38  $\mu$ L) and THF (2 mL). The reaction mixture was stirred under H<sub>2</sub> (10 atm) at 100 °C for 24 h. Then the resulting crude product was purified by column chromatography on silica gel with (PE:EA = 100:1) to afford the title compound as a white solid (34 mg, 87% yield, *E:Z* = 90:10). <sup>1</sup>H NMR (400 MHz, CDCl<sub>3</sub>):  $\delta$  7.50 (d, *J* = 7.4 Hz, 2H), 7.35 (t, *J* = 7.6 Hz, 2H), 7.30–7.18 (m, 2H), 7.12–7.03 (m, 3H), 7.01–6.95 (m, 1H), 6.74 (dd, *J* = 8.0, 1.6 Hz, 1H), 4.88 (s, 1H); <sup>13</sup>C NMR (100 MHz, CDCl<sub>3</sub>):  $\delta$  155.9, 139.3, 137.3, 130.0, 129.4, 128.8, 128.4, 127.9, 126.7, 119.6, 114.8, 113.1. Spectroscopic data are in accordance with those described in the literature.<sup>11</sup>

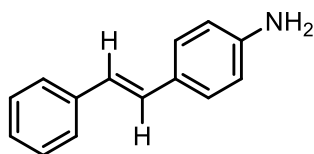

### **(*E*)-4-styrylaniline (*E*-3i)**

The general procedure was applied to **1a** (6 mg, 0.01 mmol, 5 mol %), 4-(phenylethynyl)aniline **2i** (39 mg, 0.2 mmol), Mg (10 mg), TMSCl (13  $\mu$ L) and THF (2 mL). The reaction mixture was stirred under H<sub>2</sub> (10 atm) at 90 °C for 24 h. Then the resulting crude product was purified by column chromatography on silica gel with (PE:EA = 10:1) to afford the title compound as a yellow solid (33 mg, 84% yield, *E*:*Z* = 95:5). <sup>1</sup>H NMR (400 MHz, CDCl<sub>3</sub>):  $\delta$  7.47 (d, *J* = 7.6 Hz, 2H), 7.39–7.28 (m, 4H), 7.20 (t, *J* = 7.4 Hz, 1H), 7.02 (d, *J* = 16.4 Hz, 1H), 6.92 (d, *J* = 16.4 Hz, 1H), 6.67 (d, *J* = 8.4 Hz, 2H), 3.73 (s, 2H); <sup>13</sup>C NMR (100 MHz, CDCl<sub>3</sub>):  $\delta$  146.3, 138.1, 128.8, 128.7, 128.2, 127.9, 127.0, 126.2, 125.3, 115.4. Spectroscopic data are in accordance with those described in the literature.<sup>5</sup>

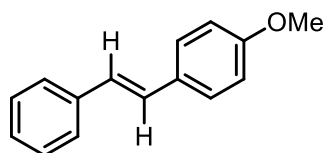

### **(*E*)-1-methoxy-4-styrylbenzene (*E*-3j)**

The general procedure was applied to **1a** (6 mg, 0.01 mmol, 5 mol %), 1-methoxy-4-(phenylethynyl)benzene **2j** (42 mg, 0.2 mmol), Mg (10 mg), TMSCl (13  $\mu$ L) and THF (2 mL). The reaction mixture was stirred under H<sub>2</sub> (10 atm) at 90 °C for 24 h. Then the resulting crude product was purified by column chromatography on silica gel with (PE:EA = 100:1) to afford the title compound as a white solid (36 mg, 90% yield, *E*:*Z* = 97:3). <sup>1</sup>H NMR (400 MHz, CDCl<sub>3</sub>):  $\delta$  7.52–7.41 (m, 4H), 7.38–7.30 (m, 2H), 7.25–7.19 (m, 1H), 7.06 (d, *J* = 16.4 Hz, 1H), 6.97 (d, *J* = 16.4 Hz, 1H), 6.93–6.86 (m, 2H), 3.82 (s, 3H). <sup>13</sup>C NMR (100 MHz, CDCl<sub>3</sub>):  $\delta$  159.5, 137.8, 130.3, 128.8, 128.4, 127.9, 127.4, 126.8, 126.4, 55.5. Spectroscopic data are in accordance with those described in the literature.<sup>5</sup>

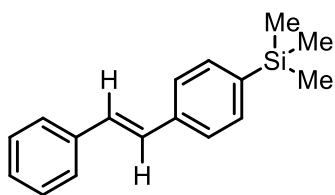

**(*E*)-trimethyl(4-styrylphenyl)silane (*E*-3k)**

The general procedure was applied to **1a** (5 mg, 0.008 mmol, 4 mol %), trimethyl(4-(phenylethynyl)phenyl)silane **2k** (50 mg, 0.2 mmol), Mg (10 mg), TMSCl (13  $\mu$ L) and THF (2 mL). The reaction mixture was stirred under H<sub>2</sub> (10 atm) at 90 °C for 24 h. Then the resulting crude product was purified by column chromatography on silica gel with (PE:EA = 100:1) to afford the title compound as a white solid (40 mg, 80% yield, *E*:*Z* > 99:1). <sup>1</sup>H NMR (400 MHz, CDCl<sub>3</sub>):  $\delta$  7.58–7.44 (m, 6H), 7.36 (t, *J* = 7.6 Hz, 2H), 7.29–7.22 (m, 1H), 7.15 (d, *J* = 16.4 Hz, 1H), 7.10 (d, *J* = 16.4 Hz, 1H), 0.28 (s, 9H). <sup>13</sup>C NMR (100 MHz, CDCl<sub>3</sub>):  $\delta$  141.2, 138.9, 138.5, 134.9, 130.1, 129.8, 128.8, 127.7, 127.0, 0.03. Spectroscopic data are in accordance with those described in the literature.<sup>12</sup>

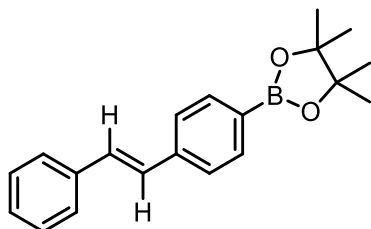

**(*E*)-4,4,5,5-tetramethyl-2-(4-styrylphenyl)-1,3,2-dioxaborolane (*E*-3l)**

The general procedure was applied to **1a** (5 mg, 0.008 mmol, 4 mol %), 4,4,5,5-tetramethyl-2-(4-(phenylethynyl)phenyl)-1,3,2-dioxaborolane **2l** (61 mg, 0.2 mmol), Mg (10 mg), TMSCl (13  $\mu$ L) and THF (2 mL). The reaction mixture was stirred under H<sub>2</sub> (10 atm) at 90 °C for 24 h. Then the resulting crude product was purified by column chromatography on silica gel with (PE:EA = 100:1) to afford the title compound as a white solid (40 mg, 65% yield, *E*:*Z* = 86:14). <sup>1</sup>H NMR (400 MHz, CDCl<sub>3</sub>):  $\delta$  7.80 (d, *J* = 8.0 Hz, 2H), 7.55–7.47 (m, 4H), 7.40–7.33 (m, 2H), 7.28–7.24 (m, 1H), 7.18 (d, *J* = 16.4 Hz, 1H), 7.11 (d, *J* = 16.4 Hz, 1H), 1.35 (s, 12H); <sup>13</sup>C NMR

(100 MHz, CDCl<sub>3</sub>):  $\delta$  140.2, 137.3, 135.3, 129.8, 128.8, 128.8, 127.9, 126.8, 125.9, 83.9, 25.0. Spectroscopic data are in accordance with those described in the literature.<sup>12</sup>

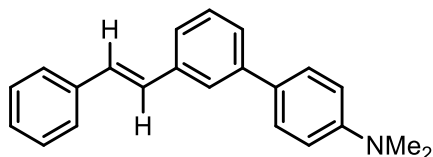

**(*E*)-*N,N*-dimethyl-3'-styryl-[1,1'-biphenyl]-4-amine (*E*-3m)**

The general procedure was applied to **1a** (12 mg, 0.018 mmol, 9 mol %), *N,N*-dimethyl-3'-(phenylethynyl)-[1,1'-biphenyl]-4-amine **2m** (59 mg, 0.2 mmol), Mg (10 mg), TMSCl (13  $\mu$ L) and THF (2 mL). The reaction mixture was stirred under H<sub>2</sub> (10 atm) at 90 °C for 24 h. Then the resulting crude product was purified by column chromatography on silica gel with (PE:EA = 10:1) to afford the title compound as a yellow solid (56 mg, 93% yield, *E:Z* = 96:4). mp. = 56–58 °C. <sup>1</sup>H NMR (400 MHz, CDCl<sub>3</sub>):  $\delta$  7.69 (s, 1H), 7.60–7.49 (m, 4H), 7.48–7.32 (m, 5H), 7.31–7.21 (m, 1H), 7.16 (s, 2H), 6.82 (d, *J* = 8.8 Hz, 2H), 3.00 (s, 6H). <sup>13</sup>C NMR (100 MHz, CDCl<sub>3</sub>):  $\delta$  150.2, 141.8, 137.8, 137.6, 129.2, 129.1, 129.1, 128.8, 127.9, 127.7, 126.7, 125.9, 124.8, 124.3, 40.7. HRMS (ESI, *m/z*): calcd for C<sub>22</sub>H<sub>22</sub>N [M+H]<sup>+</sup>: 300.1747, found: 300.1748.

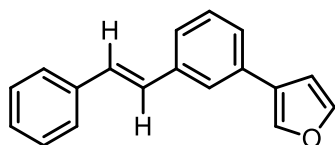

**(*E*)-3-(3-styrylphenyl)furan (*E*-3n)**

The general procedure was applied to **1a** (12 mg, 0.018 mmol, 9 mol %), 3-(3-(phenylethynyl)phenyl)furan **2n** (49 mg, 0.2 mmol), Mg (10 mg), TMSCl (13  $\mu$ L) and THF (2 mL). The reaction mixture was stirred under H<sub>2</sub> (10 atm) at 90 °C for 24 h. Then the resulting crude product was purified by column chromatography on silica gel with (PE:EA = 100:1) to afford the title compound as a white solid (47 mg, 95%

yield, *E*:*Z* = 98:2). mp. = 66–68 °C. <sup>1</sup>H NMR (400 MHz, CDCl<sub>3</sub>): δ 7.76 (s, 1H), 7.60 (s, 1H), 7.55–7.46 (m, 3H), 7.44–7.39 (m, 1H), 7.39–7.32 (m, 4H), 7.26 (t, *J* = 7.4 Hz, 1H), 7.13 (s, 2H), 6.73 (d, *J* = 1.2 Hz, 1H); <sup>13</sup>C NMR (100 MHz, CDCl<sub>3</sub>): δ 143.8, 138.8, 138.0, 137.4, 133.0, 129.3, 129.2, 128.8, 128.6, 127.9, 126.7, 126.5, 125.3, 125.2, 124.2, 109.1. HRMS (ESI, *m/z*): calcd for C<sub>18</sub>H<sub>15</sub>O [M+H]<sup>+</sup>: 247.1117, found: 247.1122.

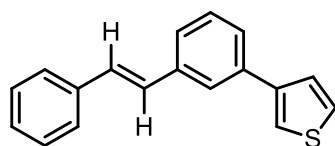

**(*E*)-3-(3-styrylphenyl)thiophene (*E*-3o)**

The general procedure was applied to **1a** (12 mg, 0.018 mmol, 9 mol %), 3-(3-(phenylethynyl)phenyl)thiophene **2o** (52 mg, 0.2 mmol), Mg (10 mg), TMSCl (13  $\mu$ L) and THF (2 mL). The reaction mixture was stirred under H<sub>2</sub> (10 atm) at 90 °C for 24 h. Then the resulting crude product was purified by column chromatography on silica gel with (PE:EA = 100:1) to afford the title compound as a white solid (44 mg, 84% yield, *E*:*Z* = 92:8). mp. = 89–91 °C. <sup>1</sup>H NMR (400 MHz, CDCl<sub>3</sub>): δ 7.72 (s, 1H), 7.56–7.35 (m, 10H), 7.30–7.23 (m, 1H), 7.16 (s, 2H); <sup>13</sup>C NMR (100 MHz, CDCl<sub>3</sub>): δ 142.4, 138.0, 137.4, 136.4, 129.3, 129.2, 128.9, 128.7, 127.9, 126.7, 126.6, 126.4, 126.0, 125.4, 124.9, 120.7. HRMS (ESI, *m/z*): calcd for C<sub>18</sub>H<sub>15</sub>S [M+H]<sup>+</sup>: 263.0889, found: 263.0886.

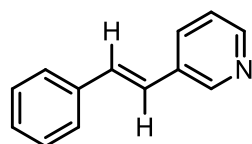

**(*E*)-3-styrylpyridine (*E*-3p)**

The general procedure was applied to **1a** (4 mg, 0.006 mmol, 3 mol %), 3-(phenylethynyl)pyridine **2p** (36 mg, 0.2 mmol), Mg (10 mg), TMSCl (13  $\mu$ L) and THF (2 mL). The reaction mixture was stirred under H<sub>2</sub> (10 atm) at 90 °C for 24 h.

Then the resulting crude product was purified by column chromatography on silica gel with (PE:EA = 4:1) to afford the title compound as a white solid (14 mg, 39% yield, *E:Z* = 94:6). <sup>1</sup>H NMR (400 MHz, CDCl<sub>3</sub>): δ 8.72 (d, *J* = 2.0 Hz, 1H), 8.49 (dd, *J* = 4.8, 1.6 Hz, 1H), 7.83 (dt, *J* = 8.0, 2.0 Hz, 1H), 7.56–7.49 (m, 2H), 7.42–7.35 (m, 2H), 7.32–7.25 (m, 2H), 7.17 (d, *J* = 16.4 Hz, 1H), 7.07 (d, *J* = 16.4 Hz, 1H); <sup>13</sup>C NMR (100 MHz, CDCl<sub>3</sub>): δ 148.7, 136.8, 133.1, 132.8, 131.0, 128.9, 128.4, 126.8, 125.0, 123.7. Spectroscopic data are in accordance with those described in the literature.<sup>13</sup>

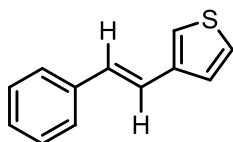

**(*E*)-3-styrylthiophene (*E*-3q)**

The general procedure was applied to **1a** (4 mg, 0.006 mmol, 3 mol %), 3-(phenylethynyl)thiophene **2q** (37 mg, 0.2 mmol), Mg (10 mg), TMSCl (13  $\mu$ L) and THF (2 mL). The reaction mixture was stirred under H<sub>2</sub> (10 atm) at 100 °C for 24 h. Then the resulting crude product was purified by column chromatography on silica gel with (PE:EA = 100:1) to afford the title compound as a white solid (26 mg, 70% yield, *E:Z* = 98:2). <sup>1</sup>H NMR (400 MHz, CDCl<sub>3</sub>): δ 7.47 (d, *J* = 7.4 Hz, 2H), 7.39–7.29 (m, 4H), 7.29–7.21 (m, 2H), 7.12 (d, *J* = 16.4 Hz, 1H), 6.95 (d, *J* = 16.4 Hz, 1H); <sup>13</sup>C NMR (100 MHz, CDCl<sub>3</sub>): δ 140.3, 137.5, 128.8, 127.6, 126.4, 126.3, 125.1, 123.0, 122.5. Spectroscopic data are in accordance with those described in the literature.<sup>14</sup>

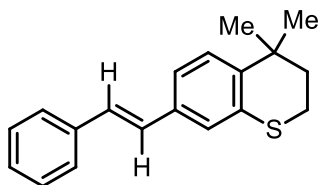

**(*E*)-4,4-dimethyl-6-styrylthiochroman (*E*-3r)**

The general procedure was applied to **1a** (5 mg, 0.008 mmol, 4 mol %),

4,4-dimethyl-6-(phenylethynyl)thiochroman **2r** (56 mg, 0.2 mmol), Mg (10 mg), TMSCl (13  $\mu$ L) and THF (2 mL). The reaction mixture was stirred under H<sub>2</sub> (10 atm) at 100 °C for 24 h. Then the resulting crude product was purified by column chromatography on silica gel with (PE:EA = 100:1) to afford the title compound as a white solid (52 mg, 93% yield, *E:Z* = 94:6). mp. = 73–75 °C. <sup>1</sup>H NMR (400 MHz, CDCl<sub>3</sub>):  $\delta$  7.53–7.47 (m, 2H), 7.45 (d, *J* = 1.8 Hz, 1H), 7.37–7.30 (m, 2H), 7.26–7.20 (m, 2H), 7.07 (d, *J* = 8.2 Hz, 2H), 7.05 (d, *J* = 16.4 Hz, 1H), 7.00 (d, *J* = 16.4 Hz, 1H), 3.11–2.97 (m, 2H), 2.03–1.92 (m, 2H), 1.37 (s, 6H). <sup>13</sup>C NMR (100 MHz, CDCl<sub>3</sub>):  $\delta$  142.2, 137.7, 133.5, 131.6, 128.8, 128.8, 127.5, 127.3, 127.0, 126.5, 125.3, 123.8, 37.8, 33.2, 30.3, 23.3. HRMS (ESI, *m/z*): calcd for C<sub>19</sub>H<sub>21</sub>S [M+H]<sup>+</sup>: 281.1358, found: 281.1359.

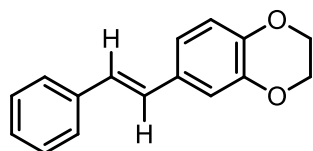

**(*E*)-6-styryl-2,3-dihydrobenzo[*b*][1,4]dioxine (*E*-3s)**

The general procedure was applied to **1a** (9 mg, 0.014 mmol, 7 mol %), 6-(phenylethynyl)-2,3-dihydrobenzo-*b*[1,4]dioxine **2s** (47 mg, 0.2 mmol), Mg (10 mg), TMSCl (13  $\mu$ L) and THF (2 mL). The reaction mixture was stirred under H<sub>2</sub> (10 atm) at 90 °C for 24 h. Then the resulting crude product was purified by column chromatography on silica gel with (PE:EA = 100:1) to afford the title compound as a white solid (40 mg, 83% yield, *E:Z* = 98:2). <sup>1</sup>H NMR (400 MHz, CDCl<sub>3</sub>):  $\delta$  7.47 (d, *J* = 7.6 Hz, 2H), 7.33 (t, *J* = 7.6 Hz, 2H), 7.26–7.19 (m, 1H), 7.05–6.90 (m, 4H), 6.84 (d, *J* = 8.4 Hz, 1H), 4.26 (s, 4H); <sup>13</sup>C NMR (100 MHz, CDCl<sub>3</sub>):  $\delta$  143.8, 143.5, 137.6, 131.3, 128.8, 128.2, 127.4, 127.3, 126.5, 120.2, 117.6, 115.1, 64.6, 64.5. Spectroscopic data are in accordance with those described in the literature.<sup>15</sup>

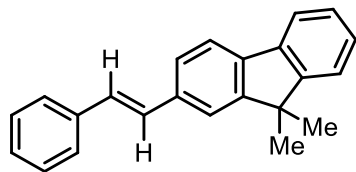

**(*E*)-9,9-dimethyl-2-styryl-9*H*-fluorene (*E*-3t)**

The general procedure was applied to **1a** (8 mg, 0.012 mmol, 6 mol %), 9,9-dimethyl-2-(phenylethynyl)-9*H*-fluorene **2t** (59 mg, 0.2 mmol), Mg (10 mg), TMSCl (13  $\mu$ L) and THF (2 mL). The reaction mixture was stirred under H<sub>2</sub> (10 atm) at 90 °C for 24 h. Then the resulting crude product was purified by column chromatography on silica gel with (PE:EA = 100:1) to afford the title compound as a white solid (52 mg, 87% yield, *E*:*Z* = 92:8). mp. = 98–110 °C. <sup>1</sup>H NMR (400 MHz, CDCl<sub>3</sub>):  $\delta$  7.75–7.65 (m, 2H), 7.63–7.50 (m, 3H), 7.50–7.40 (m, 2H), 7.40–7.10 (m, 7H), 1.51 (d, *J* = 4.2 Hz, 6H). <sup>13</sup>C NMR (100 MHz, CDCl<sub>3</sub>):  $\delta$  154.3, 154.1, 139.1, 139.0, 137.7, 136.7, 129.3, 128.8, 128.3, 127.6, 127.4, 127.2, 126.6, 126.1, 122.7, 120.6, 120.4, 120.2, 46.9, 27.4. HRMS (ESI, *m/z*): calcd for C<sub>23</sub>H<sub>21</sub> [M+H]<sup>+</sup>: 297.1638, found: 297.1641.

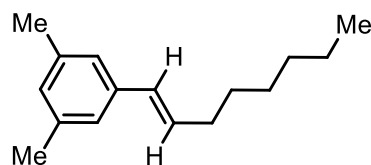

**(*E*)-1,3-dimethyl-5-(oct-1-en-1-yl)benzene (*E*-3u)**

The general procedure was applied to **1a** (3 mg, 0.004 mmol, 2 mol %), 1,3-dimethyl-5-(oct-1-yn-1-yl)benzene **2u** (43 mg, 0.2 mmol), Mg (10 mg), TMSCl (13  $\mu$ L) and THF (2 mL). The reaction mixture was stirred under H<sub>2</sub> (10 atm) at 90 °C for 24 h. Then the resulting crude product was purified by column chromatography on silica gel with (PE:EA = 100:1) to afford the title compound as a colorless oil (37 mg, 85% yield, *E*:*Z* = 99:1). <sup>1</sup>H NMR (400 MHz, CDCl<sub>3</sub>):  $\delta$  6.97 (s, 2H), 6.84 (s, 1H), 6.32 (d, *J* = 15.6 Hz, 1H), 6.20 (dt, *J* = 15.6, 6.8 Hz, 1H), 2.30 (s, 6H), 2.24–2.16 (m, 2H), 1.49–1.42 (m, 2H), 1.36–1.27 (m, 6H), 0.90 (t, *J* = 6.8 Hz, 3H). <sup>13</sup>C NMR (100



MHz, CDCl<sub>3</sub>):  $\delta$  138.0, 131.0, 129.9, 128.6, 124.0, 33.2, 31.9, 29.6, 29.1, 22.8, 21.4, 14.3. Spectroscopic data are in accordance with those described in the literature.<sup>16</sup>

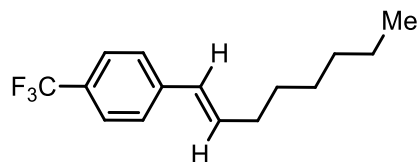

**(*E*)-1-(oct-1-en-1-yl)-4-(trifluoromethyl)benzene (*E*-3v)**

The general procedure was applied to **1a** (3 mg, 0.004 mmol, 2 mol %), 1-(oct-1-yn-1-yl)-4-(trifluoromethyl)benzene **2v** (51 mg, 0.2 mmol), Mg (10 mg), TMSCl (13  $\mu$ L) and THF (2 mL). The reaction mixture was stirred under H<sub>2</sub> (10 atm) at 90 °C for 24 h. Then the resulting crude product was purified by column chromatography on silica gel with (PE:EA = 100:1) to afford the title compound as a colorless oil (46 mg, 89% yield, *E*:*Z* > 99:1). <sup>1</sup>H NMR (400 MHz, CDCl<sub>3</sub>):  $\delta$  7.55 (d, *J* = 8.0 Hz, 2H), 7.43 (d, *J* = 8.0 Hz, 2H), 6.42 (d, *J* = 16.0 Hz, 1H), 6.35 (dt, *J* = 15.8, 6.4 Hz, 1H), 2.25 (dd, *J* = 14.0, 7.0 Hz, 2H), 1.55–1.44 (m, 2H), 1.43–1.30 (m, 6H), 0.92 (t, *J* = 6.8 Hz, 3H); <sup>13</sup>C NMR (100 MHz, CDCl<sub>3</sub>):  $\delta$  141.6 (q, *J* = 1.1 Hz), 134.3, 128.8 (q, *J* = 32.0 Hz), 128.7, 126.2, 125.6 (q, *J* = 3.8 Hz), 124.5 (q, *J* = 270.0 Hz), 33.3, 31.9, 29.3, 29.1, 22.8, 14.2; <sup>19</sup>F NMR (376 MHz, CDCl<sub>3</sub>):  $\delta$  -62.40. Spectroscopic data are in accordance with those described in the literature.<sup>15</sup>

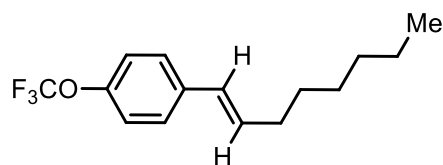

**(*E*)-1-(oct-1-en-1-yl)-4-(trifluoromethoxy)benzene (*E*-3w)**

The general procedure was applied to **1a** (3 mg, 0.004 mmol, 2 mol %), 1-(oct-1-yn-1-yl)-4-(trifluoromethoxy)benzene **2w** (54 mg, 0.2 mmol), Mg (10 mg), TMSCl (13  $\mu$ L) and THF (2 mL). The reaction mixture was stirred under H<sub>2</sub> (10 atm) at 90 °C for 24 h. Then the resulting crude product was purified by column chromatography on silica gel with (PE:EA = 100:1) to afford the title compound as a

colorless oil (50 mg, 92% yield, *E:Z* > 99:1). <sup>1</sup>H NMR (400 MHz, CDCl<sub>3</sub>): δ 7.38–7.31 (m, 2H), 7.14 (d, *J* = 8.0 Hz, 2H), 6.36 (d, *J* = 15.6 Hz, 2H), 6.21 (dt, *J* = 15.6, 6.8 Hz, 1H), 2.27–2.17 (m, 2H), 1.52–1.43 (m, 2H), 1.39–1.27 (m, 6H), 0.91 (t, *J* = 7.2 Hz, 3H); <sup>13</sup>C NMR (100 MHz, CDCl<sub>3</sub>): δ 148.1 (q, *J* = 1.9 Hz), 136.9, 132.6, 128.5, 127.2, 121.2, 120.68 (q, *J* = 255.0 Hz), 33.2, 31.9, 29.4, 29.1, 22.8, 14.2; <sup>19</sup>F NMR (376 MHz, CDCl<sub>3</sub>): δ -57.9. HRMS (ESI, *m/z*): calcd for C<sub>15</sub>H<sub>20</sub>F<sub>3</sub>O [M+H]<sup>+</sup>: 273.1461, found: 273.1458.

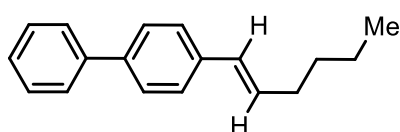

**(*E*)-4-(hex-1-en-1-yl)-1,1'-biphenyl (*E*-3x)**

The general procedure was applied to **1a** (3 mg, 0.004 mmol, 2 mol %), 4-(hex-1-yn-1-yl)-1,1'-biphenyl **2x** (47 mg, 0.2 mmol), Mg (10 mg), TMSCl (13  $\mu$ L) and THF (2 mL). The reaction mixture was stirred under H<sub>2</sub> (10 atm) at 90 °C for 24 h. Then the resulting crude product was purified by column chromatography on silica gel with (PE:EA = 100:1) to afford the title compound as a colorless oil (43 mg, 92% yield, *E:Z* > 99:1). <sup>1</sup>H NMR (400 MHz, CDCl<sub>3</sub>): δ 7.64–7.58 (m, 2H), 7.57–7.52 (m, 2H), 7.47–7.40 (m, 4H), 7.37–7.31 (m, 1H), 6.43 (d, *J* = 15.8 Hz, 1H), 6.29 (dt, *J* = 15.8, 6.8 Hz, 1H), 2.30–2.18 (m, 2H), 1.52–1.35 (m, 4H), 0.95 (t, *J* = 7.2 Hz, 3H). <sup>13</sup>C NMR (100 MHz, CDCl<sub>3</sub>): δ 141.0, 139.7, 137.2, 131.6, 129.4, 128.9, 127.3, 127.3, 127.0, 126.4, 32.9, 31.7, 22.4, 14.1. Spectroscopic data are in accordance with those described in the literature.<sup>17</sup>

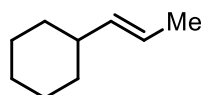

**(*E*)-prop-1-en-1-ylcyclohexane (*E*-3y)**

The general procedure was applied to **1a** (18 mg, 0.028 mmol, 7 mol %), pent-1-yn-1-ylcyclohexane **2y** (49 mg, 0.4 mmol), Mg (19 mg), TMSCl (25  $\mu$ L) and

THF (4 mL). The reaction mixture was stirred under H<sub>2</sub> (5 atm) at 80 °C for 36 h. The high volatility of the compound precluded isolation. The yield was determined by GC using <sup>n</sup>Tridecane as internal standard (71% yield, *E*:*Z* = 90:10). GC–MS (EI) calculated for C<sub>9</sub>H<sub>16</sub> (M) 124.1, found 124.0. <sup>1</sup>H NMR (400 MHz, CDCl<sub>3</sub>) δ 5.45–5.37 (m, 1H, C<sub>olefin</sub>H); <sup>13</sup>C NMR (100 MHz, CDCl<sub>3</sub>) δ 137.9 (C<sub>olefin</sub>), 122.1 (C<sub>olefin</sub>). The related NMR data are in accordance with the reported literature.<sup>17</sup>

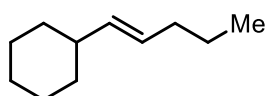

**(*E*)-pent-1-en-1-ylcyclohexane (*E*-3z)**

The general procedure was applied to **1a** (20 mg, 0.032 mmol, 8 mol %), pent-1-yn-1-ylcyclohexane **2z** (61 mg, 0.4 mmol), Mg (19 mg), 4,4'-di-*tert*-butyl-2,2'-bipyridine (4 mg, 0.016 mmol, 4 mol %), TMSCl (25  $\mu$ L) and THF (4 mL). The reaction mixture was stirred under H<sub>2</sub> (10 atm) at 100 °C for 24 h. Then the resulting crude product was purified by column chromatography on silica gel with PE to afford the title compound as a colorless oil (46 mg, 75% yield, *E*:*Z* = 90:10). <sup>1</sup>H NMR (400 MHz, CDCl<sub>3</sub>) δ 5.38–5.33 (m, 2H), 2.07–1.86 (m, 3H), 1.74–1.63 (m, 4H), 1.30–1.14 (m, 8H), 0.91–0.85 (m, 3H); <sup>13</sup>C NMR (100 MHz, CDCl<sub>3</sub>) δ 136.8, 127.6, 40.9, 34.9, 33.5, 31.8, 26.3, 22.8, 14.3. HRMS (ESI, *m/z*): calcd for C<sub>11</sub>H<sub>20</sub>Na [M+Na]<sup>+</sup>: 175.1457, found: 175.1478.

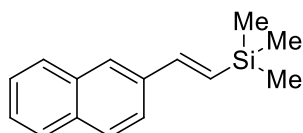

**(*E*)-trimethyl(2-(naphthalen-2-yl)vinyl)silane (*E*-3aa)**

The general procedure was applied to **1a** (4 mg, 0.006 mmol, 3 mol %), trimethyl(naphthalen-2-ylethynyl)silane **2aa** (45 mg, 0.2 mmol), Mg (10 mg), TMSCl (13  $\mu$ L) and THF (2 mL). The reaction mixture was stirred under H<sub>2</sub> (10 atm) at 100 °C for 24 h. Then the resulting crude product was purified by column chromatography

on silica gel with (PE:EA = 100:1) to afford the title compound as a colorless liquid (31 mg, 85% yield, *E:Z* > 99:1). <sup>1</sup>H NMR (400 MHz, CDCl<sub>3</sub>) δ 7.84–7.78 (m, 4H), 7.70 (dd, *J* = 8.4, 1.6 Hz, 1H), 7.50–7.42 (m, 2H), 7.07 (d, *J* = 19.2 Hz, 1H), 6.63 (d, *J* = 19.2 Hz, 1H), 0.22 (s, 9H); <sup>13</sup>C NMR (100 MHz, CDCl<sub>3</sub>) δ 143.8, 136.0, 133.8, 133.4, 130.2, 128.3, 128.3, 127.8, 126.7, 126.3, 126.1, 123.5, -1.0. Spectroscopic data are in accordance with those described in the literature.<sup>18</sup>

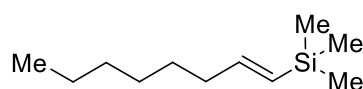

**(*E*)-trimethyl(oct-1-en-1-yl)silane (*E*-3ab)**

The general procedure was applied to **1a** (13 mg, 0.02 mmol, 5 mol %), trimethyl(oct-1-yn-1-yl)silane **2ab** (72 mg, 0.4 mmol), Mg (19 mg), TMSCl (25  $\mu$ L) and THF (2 mL). The reaction mixture was stirred under H<sub>2</sub> (6 atm) at 80 °C for 4 h, then heated up to 100 °C for 20 h. Then the resulting crude product was purified by column chromatography on silica gel with PE to afford the title compound as a colorless liquid (58 mg, 78% yield, *E:Z* = 96:4). <sup>1</sup>H NMR (400 MHz, CDCl<sub>3</sub>) δ 6.02 (dt, *J* = 18.4, 6.2 Hz, 1H), 5.61 (d, *J* = 18.4 Hz, 1H), 2.13–2.05 (m, 2H), 1.28 (t, *J* = 9.6 Hz, 8H), 0.88 (t, *J* = 6.8 Hz, 3H), 0.04 (s, 9H); <sup>13</sup>C NMR (100 MHz, CDCl<sub>3</sub>) δ 147.6, 129.6, 36.9, 31.9, 29.0, 28.8, 22.8, 14.2, -1.0. HRMS (ESI, *m/z*): calcd for C<sub>11</sub>H<sub>24</sub>SiNa [M+Na]<sup>+</sup>: 207.1539, found: 207.1558.

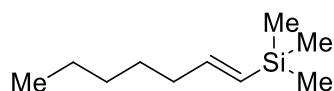

**(*E*)-hept-1-en-1-yltrimethylsilane (*E*-3ac)**

The general procedure was applied to **1a** (13 mg, 0.02 mmol, 5 mol %), trimethyl(oct-1-yn-1-yl)silane **2ac** (67 mg, 0.4 mmol), Mg (19 mg), TMSCl (25  $\mu$ L) and THF (2 mL). The reaction mixture was stirred under H<sub>2</sub> (6 atm) at 80 °C for 4 h, then heated up to 100 °C for 20 h. Then the resulting crude product was purified by

column chromatography on silica gel with pentane to afford the title compound as a colorless liquid (50 mg, 74% yield, *E:Z* = 92:8). <sup>1</sup>H NMR (400 MHz, CDCl<sub>3</sub>) δ 6.03 (dt, *J* = 18.4, 6.2 Hz, 1H), 5.61 (dt, *J* = 18.4, 1.5 Hz, 1H), 2.14–2.04 (m, 2H), 1.27–1.24 (m, 6H), 0.91–0.87 (t, *J* = 6.8 Hz, 3H), 0.04 (s, 9H); <sup>13</sup>C NMR (100 MHz, CDCl<sub>3</sub>) δ 147.6, 129.6, 36.9, 31.6, 28.6, 22.7, 14.2, -1.0. HRMS (ESI, *m/z*): calcd for C<sub>10</sub>H<sub>23</sub>Si [M+H]<sup>+</sup>: 171.1564, found: 171.1568.

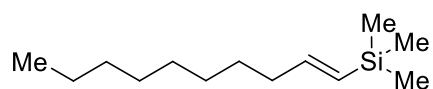

**(*E*)-dec-1-en-1-yltrimethylsilane (*E*-3ad)**

The general procedure was applied to **1a** (13 mg, 0.02 mmol, 5 mol %), trimethyl(oct-1-yn-1-yl)silane **2ad** (84 mg, 0.4 mmol), Mg (19 mg), TMSCl (25  $\mu$ L) and THF (2 mL). The reaction mixture was stirred under H<sub>2</sub> (6 atm) at 80 °C for 4 h, then heated up to 100 °C for 20 h. Then the resulting crude product was purified by column chromatography on silica gel with PE to afford the title compound as a colorless liquid (68 mg, 81% yield, *E:Z* = 93:7). <sup>1</sup>H NMR (400 MHz, CDCl<sub>3</sub>) δ 6.03 (dt, *J* = 18.4, 6.2 Hz, 1H), 5.61 (d, *J* = 18.4 Hz, 1H), 2.09 (dt, *J* = 7.4, 3.6 Hz, 2H), 1.28–1.26 (m, 12H), 0.88 (t, *J* = 6.4 Hz, 3H), 0.04 (s, 9H); <sup>13</sup>C NMR (100 MHz, CDCl<sub>3</sub>) δ 147.6, 129.6, 36.9, 32.1, 29.9, 29.5, 29.4, 28.9, 22.9, 14.3, -1.0. HRMS (ESI, *m/z*): calcd for C<sub>13</sub>H<sub>28</sub>SiNa [M+Na]<sup>+</sup>: 235.1852, found: 235.1875.

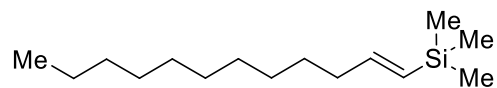

**(*E*)-dodec-1-en-1-yltrimethylsilane (*E*-3ae)**

The general procedure was applied to **1a** (13 mg, 0.02 mmol, 5 mol %), trimethyl(oct-1-yn-1-yl)silane **2ae** (96 mg, 0.4 mmol), Mg (19 mg), TMSCl (25  $\mu$ L) and THF (2 mL). The reaction mixture was stirred under H<sub>2</sub> (6 atm) at 80 °C for 4 h, then heated up to 100 °C for 20 h. Then the resulting crude product was purified by

column chromatography on silica gel with PE to afford the title compound as a colorless liquid (80 mg, 83% yield, *E:Z* = 95:5). <sup>1</sup>H NMR (400 MHz, CDCl<sub>3</sub>) δ 6.03 (dt, *J* = 18.4, 6.2 Hz, 1H), 5.62 (dt, *J* = 18.4, 1.4 Hz, 1H), 2.16–2.05 (m, 2H), 1.32–1.25(m, 16H), 0.89 (t, *J* = 6.8 Hz, 3H), 0.05 (s, 9H); <sup>13</sup>C NMR (100 MHz, CDCl<sub>3</sub>) δ 147.6, 129.6, 37.0, 32.1, 29.8, 29.8, 29.7, 29.6, 29.4, 28.9, 22.9, 14.3, -1.0. HRMS (ESI, *m/z*): calcd for C<sub>15</sub>H<sub>33</sub>Si [M+H]<sup>+</sup>: 241.2346, found: 241.2347.

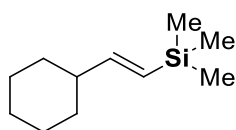

**(*E*)-(2-cyclohexylvinyl)trimethylsilane (*E*-3af)**

The general procedure was applied to **1a** (18 mg, 0.028 mmol, 7 mol %), trimethyl(oct-1-yn-1-yl)silane **2af** (72 mg, 0.4 mmol), Mg (19 mg), TMSCl (25  $\mu$ L) and THF (2 mL). The reaction mixture was stirred under H<sub>2</sub> (6 atm) at 80 °C for 4 h, then heated up to 100 °C for 20 h. Then the resulting crude product was purified by column chromatography on silica gel with PE to afford the title compound as a colorless liquid (64 mg, 89% yield, *E:Z* = 97:3). <sup>1</sup>H NMR (400 MHz, CDCl<sub>3</sub>) δ 5.97 (dd, *J* = 18.8, 1.4 Hz, 1H), 5.56 (dd, *J* = 18.8, 1.4 Hz, 1H), 2.00–1.88 (m, 1H), 1.77–1.69 (m, 4H), 1.68–1.60 (m, 1H), 1.30–1.27 (m, 1H), 1.23–1.02 (m, 4H), 0.04 (s, 9H); <sup>13</sup>C NMR (100 MHz, CDCl<sub>3</sub>) δ 153.0, 126.3, 44.0, 32.6, 26.5, 26.3, -1.0. HRMS (ESI, *m/z*): calcd for C<sub>11</sub>H<sub>22</sub>SiNa [M+Na]<sup>+</sup>: 205.1383, found: 205.1355.

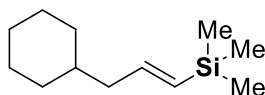

**(*E*)-(3-cyclohexylprop-1-en-1-yl)trimethylsilane (*E*-3ag)**

The general procedure was applied to **1a** (18 mg, 0.028 mmol, 7 mol %), trimethyl(oct-1-yn-1-yl)silane **2ag** (78 mg, 0.4 mmol), Mg (19 mg), TMSCl (25  $\mu$ L) and THF (2 mL). The reaction mixture was stirred under H<sub>2</sub> (6 atm) at 80 °C for 4 h, then heated up to 100 °C for 20 h. Then the resulting crude product was purified by

column chromatography on silica gel with PE to afford the title compound as a colorless liquid (64 mg, 82% yield, *E:Z* = 96:4). <sup>1</sup>H NMR (400 MHz, CDCl<sub>3</sub>) δ 5.99 (ddd, *J* = 18.4, 8.6, 4.8 Hz, 1H), 5.59 (dt, *J* = 18.4, 1.3 Hz, 1H), 2.00 (td, *J* = 6.8, 1.2 Hz, 2H), 1.72–1.67 (m, 4H), 1.29–1.11 (m, 5H), 0.93–0.83 (m, 2H), 0.05 (s, 9H); <sup>13</sup>C NMR (100 MHz, CDCl<sub>3</sub>) δ 146.1, 131.1, 45.2, 37.7, 33.3, 26.8, 26.6, -0.9. HRMS (ESI, *m/z*): calcd for C<sub>12</sub>H<sub>24</sub>SiK [M+K]<sup>+</sup>: 235.1279, found: 235.1280.

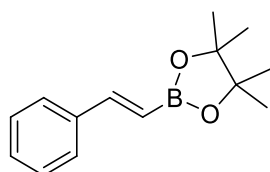

**(*E*)-4,4,5,5-tetramethyl-2-styryl-1,3,2-dioxaborolane (*E*-3ah)**

The general procedure was applied to **1a** (4 mg, 0.006 mmol, 3 mol %), 4,4,5,5-tetramethyl-2-(phenylethynyl)-1,3,2-dioxaborolane **2ah** (46 mg, 0.2 mmol), Mg (10 mg), TMSCl (13  $\mu$ L) and THF (2 mL). The reaction mixture was stirred under H<sub>2</sub> (10 atm) at 100 °C for 24 h. Then the resulting crude product was purified by column chromatography on silica gel with (PE:EA = 50:1) to afford the title compound as a colorless liquid (36 mg, 78% yield, *E:Z* = 97:3). <sup>1</sup>H NMR (400 MHz, CDCl<sub>3</sub>) δ 7.54–7.50 (m, 2H), 7.45 (d, *J* = 18.4 Hz, 1H), 7.39–7.30 (m, 3H), 6.22 (d, *J* = 18.4 Hz, 1H), 1.35 (s, 12H); <sup>13</sup>C NMR (100 MHz, CDCl<sub>3</sub>) δ 149.6, 137.5, 129.0, 128.6, 127.1, 83.4, 24.9; <sup>11</sup>B NMR (128 MHz, CDCl<sub>3</sub>) δ 30.7. Spectroscopic data are in accordance with those described in the literature.<sup>19</sup>

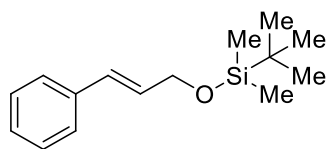

***tert*-butyl(cinnamyloxy)dimethylsilane (*E*-3ai)**

The general procedure was applied to **1a** (4 mg, 0.006 mmol, 3 mol %), *tert*-butyldimethyl((3-phenylprop-2-yn-1-yl)oxy)silane **2ai** (49 mg, 0.2 mmol), Mg (10 mg), TMSCl (13  $\mu$ L) and THF (2 mL). The reaction mixture was stirred under H<sub>2</sub>

(10 atm) at 100 °C for 24 h. Then the resulting crude product was purified by column chromatography on silica gel with (PE:EA = 50:1) to afford the title compound as a colorless liquid (40 mg, 78% yield, *E*:*Z* = 99:1). <sup>1</sup>H NMR (400 MHz, CDCl<sub>3</sub>) δ 7.43 (d, *J* = 7.4 Hz, 2H), 7.36 (t, *J* = 7.6 Hz, 2H), 7.27 (t, *J* = 7.2 Hz, 1H), 6.65 (d, *J* = 15.8 Hz, 1H), 6.34 (dt, *J* = 15.8, 5.0 Hz, 1H), 4.41 (dd, *J* = 5.0, 1.6 Hz, 2H), 1.01 (s, 9H), 0.17 (s, 6H); <sup>13</sup>C NMR (100 MHz, CDCl<sub>3</sub>) δ 137.3, 129.6, 129.3, 128.6, 127.4, 126.5, 64.0, 26.1, 18.6, -5.0. Spectroscopic data are in accordance with those described in the literature.<sup>20</sup>

## 6. Supplementary General Procedure of CAAC-Imino-Cr-Catalyzed *Cis*-Selective Hydrogenation of Alkynes for the Synthesis of *Z*-Olefins

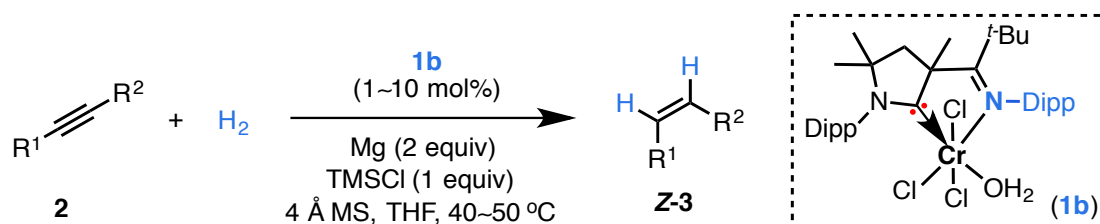

In a Schlenk tube were placed **1b** (1~10 mol %), alkyne **2** (0.2 mmol), Mg (10 mg), 4 Å MS (25 mg), TMSCl (25  $\mu$ L) and THF (2 mL) under atmosphere of nitrogen. The tube was quickly moved to a high-pressure autoclave, and stirred under atmosphere of H<sub>2</sub> (40~50 atm) at 40~50 °C for 24 h. After quenching with HCl<sub>aq</sub> (2 mL, 1 M), the crude product was extracted with ethyl acetate (3  $\times$  4 mL). The combined organic phases were dried over anhydrous Na<sub>2</sub>SO<sub>4</sub> and concentrated under vacuum. The stereoselectivity of the *Z*-olefin relative to *E*-stereomer was determined by GC analysis or <sup>1</sup>H NMR prior to purification. The crude product was purified by silica gel chromatography to afford the desired olefin compound.



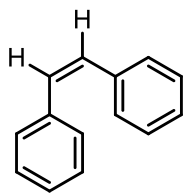

**(Z)-1,2-diphenylethene (Z-3a)**

The general procedure was applied to **1b** (7 mg, 0.01 mmol, 5 mol %), 1,2-diphenylethyne **2a** (36 mg, 0.2 mmol), Mg (10 mg), TMSCl (25  $\mu$ L), 4 Å MS (25 mg) and THF (2 mL). The reaction mixture was stirred under H<sub>2</sub> (50 atm) at 40 °C for 24 h. Then the resulting crude product was purified by column chromatography on silica gel with PE to afford the title compound as a colorless oil (31 mg, 86% yield, *Z/E* = 93:7). <sup>1</sup>H NMR (400 MHz, CDCl<sub>3</sub>):  $\delta$  7.19 (m, 10H), 6.58 (s, 2H); <sup>13</sup>C NMR (100 MHz, CDCl<sub>3</sub>):  $\delta$  137.4, 130.4, 129.0, 128.3, 127.2. Spectroscopic data are in accordance with those described in the literature.<sup>5</sup>

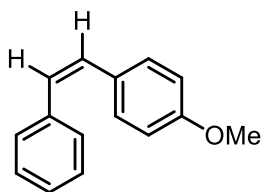

**(Z)-1-methoxy-4-styrylbenzene (Z-3j)**

The general procedure was applied to **1b** (7 mg, 0.01 mmol, 5 mol %), 1-methoxy-4-(phenylethynyl)benzene **2j** (42 mg, 0.2 mmol), Mg (10 mg), TMSCl (25  $\mu$ L), 4 Å MS (25 mg) and THF (2 mL). The reaction mixture was stirred under H<sub>2</sub> (40 atm) at 40 °C for 24 h. Then the resulting crude product was purified by column chromatography on silica gel with (PE:EA = 100:1) to afford the title compound as a colorless oil (39 mg, 92% yield, *Z/E* = 96:4). <sup>1</sup>H NMR (400 MHz, CDCl<sub>3</sub>):  $\delta$  7.29–7.15 (m, 7H), 6.79–6.70 (m, 2H), 6.54 (d, *J* = 12.0 Hz, 2H), 6.50 (d, *J* = 12.4 Hz, 2H), 3.78 (s, 3H); <sup>13</sup>C NMR (100 MHz, CDCl<sub>3</sub>):  $\delta$  158.8, 137.8, 130.3, 129.9, 129.8, 129.0, 128.9, 128.4, 127.0, 113.7, 55.3. Spectroscopic data are in accordance with those described in the literature.<sup>5</sup>

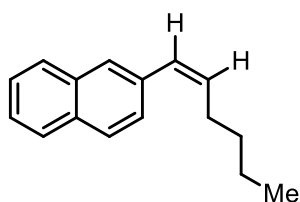

**(Z)-2-(hex-1-en-1-yl)naphthalene (Z-3b)**

The general procedure was applied to **1b** (6 mg, 0.008 mmol, 4 mol %), 2-(hex-1-yn-1-yl)naphthalene **2b** (42 mg, 0.2 mmol), Mg (10 mg), TMSCl (25  $\mu$ L), 4 Å MS (25 mg) and THF (2 mL). The reaction mixture was stirred under H<sub>2</sub> (50 atm) at 40 °C for 24 h. Then the resulting crude product was purified by column chromatography on silica gel with (PE:EA = 100:1) to afford the title compound as a colorless oil (38 mg, 90% yield, *Z/E* = 98:2). <sup>1</sup>H NMR (400 MHz, CDCl<sub>3</sub>):  $\delta$  7.85–7.75 (m, 3H), 7.72 (s, 1H), 7.51–7.38 (m, 3H), 6.56 (d, *J* = 11.6 Hz, 1H), 5.76 (dt, *J* = 11.6, 7.2 Hz, 1H), 2.5–2.32 (m, 2H), 1.53–1.33 (m, 4H), 0.91 (t, *J* = 7.2 Hz, 3H); <sup>13</sup>C NMR (100 MHz, CDCl<sub>3</sub>):  $\delta$  135.5, 133.9, 133.5, 132.3, 128.9, 128.1, 127.7, 127.7, 127.5, 127.4, 126.1, 125.8, 32.3, 28.6, 22.6, 14.1. HRMS (ESI, *m/z*): calcd for C<sub>16</sub>H<sub>19</sub> [M+H]<sup>+</sup>: 211.1481, found: 211.1480.

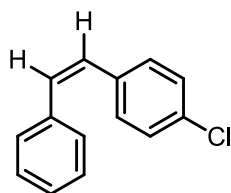

**(Z)-1-chloro-4-styrylbenzene (Z-3aj)**

The general procedure was applied to **1b** (11 mg, 0.016 mmol, 8 mol %), 1-chloro-4-(phenylethynyl)benzene **2aj** (42 mg, 0.2 mmol), Mg (10 mg), TMSCl (25  $\mu$ L), 4 Å MS (25 mg) and THF (2 mL). The reaction mixture was stirred under H<sub>2</sub> (50 atm) at 40 °C for 24 h. Then the resulting crude product was purified by column chromatography on silica gel with (PE:EA = 100:1) to afford the title compound as a colorless oil (37 mg, 86% yield, *Z/E* = 97:3). <sup>1</sup>H NMR (400 MHz, CDCl<sub>3</sub>):  $\delta$  7.27–7.11 (m, 9H), 6.62 (dd, *J* = 12.4, 1.2 Hz, 1H), 6.52 (d, *J* = 12.4 Hz, 1H); <sup>13</sup>C

NMR (100 MHz, CDCl<sub>3</sub>):  $\delta$  137.0, 135.8, 132.9, 131.1, 130.4, 129.1, 128.9, 128.5, 128.5, 127.5. Spectroscopic data are in accordance with those described in the literature.<sup>5</sup>

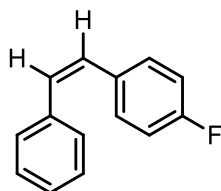

**(Z)-1-fluoro-4-styrylbenzene (Z-3ak)**

The general procedure was applied to **1b** (14 mg, 0.02 mmol, 10 mol %), 1-fluoro-4-(phenylethynyl)benzene **2ak** (39 mg, 0.2 mmol), Mg (10 mg), TMSCl (25  $\mu$ L), 4 Å MS (25 mg) and THF (2 mL). The reaction mixture was stirred under H<sub>2</sub> (50 atm) at 40 °C for 24 h. Then the resulting crude product was purified by column chromatography on silica gel with (PE:EA = 100:1) to afford the title compound as a colorless oil (33 mg, 83% yield, *Z/E* = 91:9). <sup>1</sup>H NMR (400 MHz, CDCl<sub>3</sub>):  $\delta$  7.31–7.13 (m, 7H), 6.97–6.82 (m, 2H), 6.59 (d, *J* = 12.0 Hz, 1H), 6.53 (d, *J* = 12.0 Hz, 1H); <sup>13</sup>C NMR (100 MHz, CDCl<sub>3</sub>):  $\delta$  162.0 (d, *J* = 245.1 Hz), 137.2, 133.3 (d, *J* = 3.3 Hz), 130.7 (d, *J* = 7.8 Hz), 130.4, 129.2, 129.0, 128.4, 127.3, 115.3 (d, *J* = 21.3 Hz); <sup>19</sup>F NMR (376 MHz, CDCl<sub>3</sub>):  $\delta$  –114.6. Spectroscopic data are in accordance with those described in the literature.<sup>5</sup>

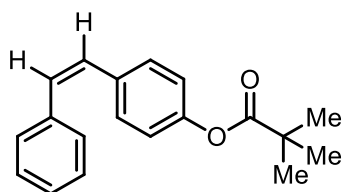

**(Z)-4-styrylphenyl pivalate (Z-3al)**

The general procedure was applied to **1b** (14 mg, 0.02 mmol, 10 mol %), 4-(phenylethynyl)phenyl pivalate **2al** (56 mg, 0.2 mmol), Mg (10 mg), TMSCl (25  $\mu$ L), 4 Å MS (25 mg) and THF (2 mL). The reaction mixture was stirred under H<sub>2</sub> (50 atm) at 40 °C for 24 h. Then the resulting crude product was purified by column

chromatography on silica gel with (PE:EA = 50:1) to afford the title compound as a colorless oil (52 mg, 92% yield, *Z/E* = 97:3). <sup>1</sup>H NMR (400 MHz, CDCl<sub>3</sub>): δ 7.28-7.13 (m, 7H), 6.94-6.85 (m, 2H), 6.60 (d, *J* = 12.4 Hz, 1H), 6.55 (d, *J* = 12.4 Hz, 1H), 1.34 (s, 9H); <sup>13</sup>C NMR (100 MHz, CDCl<sub>3</sub>): δ 177.2, 150.1, 137.2, 134.7, 130.5, 123.0, 129.4, 129.0, 128.4, 127.3, 121.4, 39.2, 27.3. Spectroscopic data are in accordance with those described in the literature.<sup>21</sup>

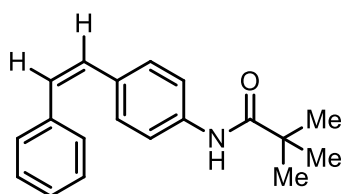

**(*Z*)-N-(4-styrylphenyl)pivalamide (*Z*-3am)**

The general procedure was applied to **1b** (14 mg, 0.02 mmol, 10 mol %), *N*-(4-(phenylethynyl)phenyl)pivalamide **2am** (55 mg, 0.2 mmol), Mg (10 mg), TMSCl (25  $\mu$ L), 4 Å MS (25 mg) and THF (2 mL). The reaction mixture was stirred under H<sub>2</sub> (50 atm) at 40 °C for 24 h. Then the resulting crude product was purified by column chromatography on silica gel with (PE:EA = 10:1) to afford the title compound as a yellow oil (49 mg, 87% yield, *Z/E* = 99:1). <sup>1</sup>H NMR (400 MHz, CDCl<sub>3</sub>): δ 7.41–7.36 (m, 2H), 7.29 (s, 1H), 7.27–7.17 (m, 7H), 6.56 (d, *J* = 12.4 Hz, 1H), 6.53 (d, *J* = 12.4 Hz, 1H), 1.30 (s, 9H); <sup>13</sup>C NMR (100 MHz, CDCl<sub>3</sub>): δ 176.6, 137.4, 137.0, 133.3, 129.9, 129.7, 129.7, 129.0, 128.4, 127.2, 119.7, 39.8, 27.8. HRMS (ESI, *m/z*): calcd for C<sub>19</sub>H<sub>22</sub>NO [*M*+H]<sup>+</sup>: 280.1696, found: 280.1689.

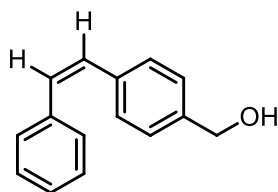

**(*Z*)-(4-styrylphenyl)methanol (*Z*-3an)**

The general procedure was applied to **1b** (7 mg, 0.01 mmol, 5 mol %), (4-(phenylethynyl)phenyl)methanol **2an** (42 mg, 0.2 mmol), Mg (10 mg), TMSCl (25

$\mu\text{L}$ ), 4 Å MS (25 mg) and THF (2 mL). The reaction mixture was stirred under  $\text{H}_2$  (60 atm) at 50 °C for 24 h. Then the resulting crude product was purified by column chromatography on silica gel with (PE:EA = 5:1) to afford the title compound as a colorless oil (30 mg, 72% yield,  $Z/E = 99:1$ ).  $^1\text{H}$  NMR (400 MHz,  $\text{CDCl}_3$ ):  $\delta$  7.21 (m, 9H), 6.60 (d,  $J = 12.4$  Hz, 1H), 6.57 (d,  $J = 12.4$  Hz, 1H), 4.63 (s, 2H), 1.80 (s, 1H);  $^{13}\text{C}$  NMR (100 MHz,  $\text{CDCl}_3$ ):  $\delta$  139.8, 137.3, 136.8, 130.5, 126.0, 129.2, 129.0, 128.4, 127.3, 127.0, 65.2. Spectroscopic data are in accordance with those described in the literature.<sup>22</sup>

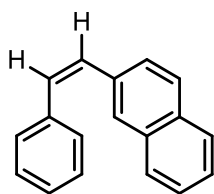

#### (*Z*)-2-styrylnaphthalene (**Z-3ao**)

The general procedure was applied to **1b** (7 mg, 0.01 mmol, 5 mol %), 2-(phenylethynyl)naphthalene **2ao** (46 mg, 0.2 mmol), Mg (10 mg), TMSCl (25  $\mu\text{L}$ ), 4 Å MS (25 mg) and THF (2 mL). The reaction mixture was stirred under  $\text{H}_2$  (50 atm) at 40 °C for 24 h. Then the resulting crude product was purified by column chromatography on silica gel with PE to afford the title compound as a colorless oil (35 mg, 75% yield,  $Z/E > 99:1$ ).  $^1\text{H}$  NMR (400 MHz,  $\text{CDCl}_3$ ):  $\delta$  7.83–7.69 (m, 3H), 7.65 (d,  $J = 8.4$  Hz, 1H), 7.47–7.40 (m, 2H), 7.35 (dd,  $J = 8.4, 1.6$  Hz, 1H), 7.31–7.27 (m, 2H), 7.25–7.18 (m, 3H), 6.77 (d,  $J = 12.4$ , 1H), 6.69 (d,  $J = 12.4$ , 1H);  $^{13}\text{C}$  NMR (100 MHz,  $\text{CDCl}_3$ ):  $\delta$  137.4, 135.0, 133.6, 132.7, 130.8, 130.3, 129.1, 128.4, 128.1, 128.1, 127.8, 127.6, 127.4, 127.1, 126.1, 126.0. Spectroscopic data are in accordance with those described in the literature.<sup>8</sup>

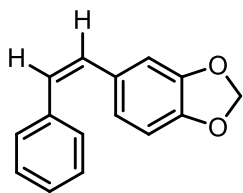

### (Z)-5-styrylbenzo[d][1,3]dioxole (Z-3ap)

The general procedure was applied to **1b** (8.3 mg, 0.012 mmol, 6 mol %), 5-(phenylethynyl)benzo[d][1,3]dioxole **2ap** (44 mg, 0.2 mmol), Mg (10 mg), TMSCl (25  $\mu$ L), 4 Å MS (25 mg) and THF (2 mL). The reaction mixture was stirred under H<sub>2</sub> (50 atm) at 40 °C for 24 h. Then the resulting crude product was purified by column chromatography on silica gel with PE to afford the title compound as a colorless oil (39 mg, 88% yield, *Z/E* = 94:6). <sup>1</sup>H NMR (400 MHz, CDCl<sub>3</sub>):  $\delta$  7.32–7.14 (m, 5H), 6.78–6.65 (m, 3H), 6.52 (d, *J* = 12.0 Hz, 1H), 6.48(d, *J* = 12.4 Hz, 1H), 5.90 (s, 2H); <sup>13</sup>C NMR (100 MHz, CDCl<sub>3</sub>):  $\delta$  147.5, 146.8, 137.4, 131.3, 129.9, 129.4, 129.0, 128.4, 127.2, 123.1, 109.1, 108.3, 101.0. Spectroscopic data are in accordance with those described in the literature.<sup>23</sup>

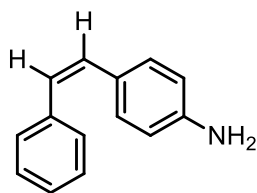

### (Z)-4-styrylaniline (Z-3i)

The general procedure was applied to **1b** (7 mg, 0.01 mmol, 5 mol %), 4-(phenylethynyl)aniline **2i** (39 mg, 0.2 mmol), Mg (10 mg), TMSCl (25  $\mu$ L), 4 Å MS (25 mg) and THF (2 mL). The reaction mixture was stirred under H<sub>2</sub> (50 atm) at 40 °C for 24 h. Then the resulting crude product was purified by column chromatography on silica gel with (PE:EA = 10:1) to afford the title compound as a yellow oil (34 mg, 86% yield, *Z/E* = 96:4). <sup>1</sup>H NMR (400 MHz, CDCl<sub>3</sub>):  $\delta$  7.48 (d, *J* = 7.2 Hz, 2H), 7.34 (t, *J* = 8.0 Hz, 4H), 7.21 (t, *J* = 7.4 Hz, 1H), 7.08–6.87 (m, 2H), 6.68 (d, *J* = 8.4 Hz, 2H), 3.74 (s, 2H); <sup>13</sup>C NMR (100 MHz, CDCl<sub>3</sub>):  $\delta$  146.3, 138.1, 128.8, 128.7, 128.2, 127.9, 127.0, 126.2, 125.3, 115.4. Spectroscopic data are in accordance with those described in the literature.<sup>5</sup>

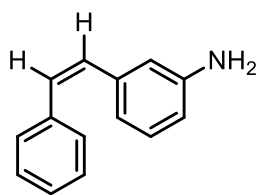

### (Z)-3-styrylaniline (**Z-3aq**)

The general procedure was applied to **1b** (7 mg, 0.01 mmol, 5 mol %), 3-(phenylethynyl)aniline **2aq** (39 mg, 0.2 mmol), Mg (10 mg), TMSCl (25  $\mu$ L), 4 Å MS (25 mg) and THF (2 mL). The reaction mixture was stirred under H<sub>2</sub> (50 atm) at 40 °C for 24 h. Then the resulting crude product was purified by column chromatography on silica gel with (PE:EA = 10:1) to afford the title compound as a yellow oil (34 mg, 88% yield, *Z/E* > 99:1). <sup>1</sup>H NMR (400 MHz, CDCl<sub>3</sub>):  $\delta$  7.31–7.13 (m, 5H), 7.02 (t, *J* = 8.0 Hz, 1H), 6.65 (d, *J* = 7.6 Hz, 1H), 6.60–6.55 (m, 1H), 6.55–6.48 (m, 3H), 3.53 (s, 3H); <sup>13</sup>C NMR (100 MHz, CDCl<sub>3</sub>):  $\delta$  146.3, 138.5, 137.5, 130.6, 130.2, 129.3, 129.1, 128.3, 127.2, 119.6, 115.5, 114.2. HRMS (ESI, *m/z*): calcd for C<sub>14</sub>H<sub>14</sub>N [M+H]<sup>+</sup>: 196.1121, found: 196.1120.

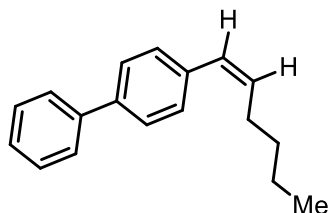

### (Z)-4-(hex-1-en-1-yl)-1,1'-biphenyl (**Z-3x**)

The general procedure was applied to **1b** (6 mg, 0.008 mmol, 4 mol %), 4-(hex-1-yn-1-yl)-1,1'-biphenyl **2x** (47 mg, 0.2 mmol), Mg (10 mg), TMSCl (25  $\mu$ L), 4 Å MS (25 mg) and THF (2 mL). The reaction mixture was stirred under H<sub>2</sub> (50 atm) at 40 °C for 24 h. Then the resulting crude product was purified by column chromatography on silica gel with (PE:EA = 100:1) to afford the title compound as a colorless oil (46 mg, 97% yield, *Z/E* = 92:8). <sup>1</sup>H NMR (400 MHz, CDCl<sub>3</sub>):  $\delta$  7.65–7.55 (m, 4H), 7.48–7.41 (m, 2H), 7.39–7.31 (m, 3H), 6.44 (d, *J* = 11.6 Hz, 1H), 5.71 (dt, *J* = 11.6, 7.2 Hz, 1H), 2.39 (qd, *J* = 7.4, 1.6 Hz, 2H), 1.52–1.33 (m, 4H), 0.92

(t,  $J = 7.2$  Hz, 3H);  $^{13}\text{C}$  NMR (100 MHz,  $\text{CDCl}_3$ ):  $\delta$  141.0, 139.3, 139.1, 137.0, 136.4, 133.7, 129.3, 128.9, 128.4, 127.3, 127.1, 127.0, 32.3, 28.7, 22.6, 14.1. Spectroscopic data are in accordance with those described in the literature.<sup>24</sup>

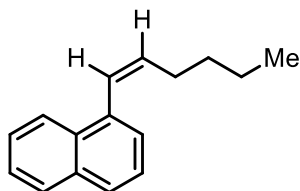

**(Z)-1-(hex-1-en-1-yl)naphthalene (Z-3ar)**

The general procedure was applied to **1b** (6 mg, 0.008 mmol, 4 mol %), 1-(hex-1-yn-1-yl)naphthalene **2ar** (42 mg, 0.2 mmol), Mg (10 mg),  $\text{TMSCl}$  (25  $\mu\text{L}$ ), 4 Å MS (25 mg) and THF (2 mL). The reaction mixture was stirred under  $\text{H}_2$  (50 atma) at 40 °C for 24 h. Then the resulting crude product was purified by column chromatography on silica gel with (PE:EA = 100:1) to afford the title compound as a colorless oil (37 mg, 89% yield,  $Z/E = 96:4$ ).  $^1\text{H}$  NMR (400 MHz,  $\text{CDCl}_3$ ):  $\delta$  8.07–7.98 (m, 1H), 7.90–7.83 (m, 1H), 7.78 (d,  $J = 8.2$  Hz, 1H), 7.54–7.43 (m, 3H), 7.36 (d,  $J = 7.2$  Hz, 1H), 6.88 (d,  $J = 11.2$  Hz, 1H), 5.96 (dt,  $J = 11.6, 7.2$  Hz, 1H), 2.18 (qd,  $J = 7.4, 1.6$  Hz, 2H), 1.45–1.36 (m, 2H), 1.35–1.24 (m, 2H), 0.84 (t,  $J = 7.2$  Hz, 3H);  $^{13}\text{C}$  NMR (100 MHz,  $\text{CDCl}_3$ ):  $\delta$  135.1, 134.8, 133.7, 132.1, 128.4, 127.2, 126.9, 126.5, 125.9, 125.8, 125.4, 125.2, 32.1, 28.6, 22.5, 14.1. Spectroscopic data are in accordance with those described in the literature.<sup>25</sup>

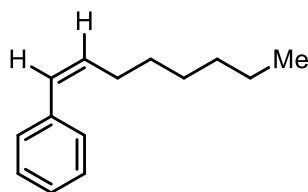

**(Z)-oct-1-en-1-ylbenzene (Z-3as)**

The general procedure was applied to **1b** (1 mg, 0.002 mmol, 1 mol %), oct-1-yn-1-ylbenzene **2as** (37 mg, 0.2 mmol), Mg (10 mg),  $\text{TMSCl}$  (25  $\mu\text{L}$ ), 4 Å MS (25 mg) and THF (2 mL). The reaction mixture was stirred under  $\text{H}_2$  (40 atm) at 40 °C



for 24 h. Then the resulting crude product was purified by column chromatography on silica gel with (PE:EA = 100:1) to afford the title compound as a colorless oil (35 mg, 92% yield, *Z/E* = 90:10). <sup>1</sup>H NMR (400 MHz, CDCl<sub>3</sub>): δ 7.34–7.24 (m, 4H), 7.22–7.16 (m, 1H), 6.40 (d, *J* = 11.6 Hz, 1H), 5.66 (dt, *J* = 11.6, 7.2 Hz, 1H), 2.32 (qd, *J* = 7.4, 1.6 Hz, 2H), 1.48–1.40 (m, 2H), 1.33–1.24 (m, 6H), 0.87 (t, *J* = 7.2 Hz, 3H). <sup>13</sup>C NMR (100 MHz, CDCl<sub>3</sub>): δ 138.0, 133.4, 128.9, 128.8, 128.2, 126.5, 31.9, 30.1, 29.2, 28.8, 22.8, 14.2. Spectroscopic data are in accordance with those described in the literature.<sup>26</sup>

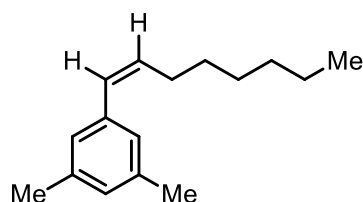

**(*Z*)-1,3-dimethyl-5-(oct-1-en-1-yl)benzene (*Z*-3u)**

The general procedure was applied to **1b** (3 mg, 0.004 mmol, 2 mol %), 1,3-dimethyl-5-(oct-1-yn-1-yl)benzene **2u** (43 mg, 0.2 mmol), Mg (10 mg), TMSCl (25  $\mu$ L), 4 Å MS (25 mg) and THF (2 mL). The reaction mixture was stirred under H<sub>2</sub> (40 atm) at 40 °C for 24 h. Then the resulting crude product was purified by column chromatography on silica gel with (PE:EA = 100:1) to afford the title compound as a colorless oil (44 mg, 99% yield, *Z/E* = 90:10). <sup>1</sup>H NMR (400 MHz, CDCl<sub>3</sub>): δ 6.91 (s, 2H), 6.87 (s, 1H), 6.35 (d, *J* = 11.6 Hz, 1H), 5.63 (dt, *J* = 11.6, 7.2 Hz, 1H), 2.37–2.30 (m, 8H), 1.50–1.41 (m, 2H), 1.37–1.26 (m, 6H), 0.89 (t, *J* = 6.8 Hz, 3H). <sup>13</sup>C NMR (100 MHz, CDCl<sub>3</sub>): δ 137.9, 137.6, 133.1, 128.9, 128.2, 126.7, 31.9, 30.1, 29.2, 28.9, 22.8, 21.5, 14.2. HRMS (ESI, *m/z*): calcd for C<sub>16</sub>H<sub>25</sub> [M+H]<sup>+</sup>: 217.1951, found: 217.1953.

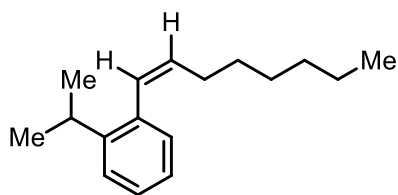

**(Z)-1-isopropyl-2-(oct-1-en-1-yl)benzene (Z-3at)**

The general procedure was applied to **1b** (6 mg, 0.008 mmol, 4 mol %), 1-isopropyl-2-(oct-1-yn-1-yl)benzene **2at** (46 mg, 0.2 mmol), Mg (10 mg), TMSCl (25  $\mu$ L), 4 Å MS (25 mg) and THF (2 mL). The reaction mixture was stirred under H<sub>2</sub> (40 atm) at 40 °C for 24 h. Then the resulting crude product was purified by column chromatography on silica gel with (PE:EA = 100:1) to afford the title compound as a colorless oil (44 mg, 95% yield, *Z/E* > 99:1). <sup>1</sup>H NMR (400 MHz, CDCl<sub>3</sub>):  $\delta$  7.29–7.26(m, 1H), 7.24–7.18 (m, 1H), 7.16–7.08 (m, 2H), 6.53 (d, *J* = 11.6 Hz, 1H), 5.82–5.60 (m, 1H), 3.21–3.06 (m, 1H), 2.18–1.96 (m, 2H), 1.41–1.33 (m, 2H), 1.27–1.22 (m, 6H), 1.20 (s, 3H), 1.18 (s, 3H), 0.85 (t, *J* = 7.2 Hz, 3H); <sup>13</sup>C NMR (100 MHz, CDCl<sub>3</sub>):  $\delta$  146.9, 136.0, 133.4, 129.7, 128.0, 127.2, 125.2, 124.8, 31.9, 29.9, 29.9, 29.1, 28.5, 23.4, 22.8, 14.2. HRMS (ESI, *m/z*): calcd for C<sub>17</sub>H<sub>27</sub> [M+H]<sup>+</sup>: 231.2107, found: 231.2111.

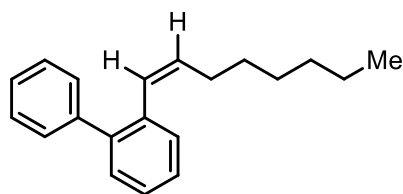**(Z)-2-(oct-1-en-1-yl)-1,1'-biphenyl (Z-3au)**

The general procedure was applied to **1b** (6 mg, 0.008 mmol, 4 mol %), 2-(oct-1-yn-1-yl)-1,1'-biphenyl **2au** (52 mg, 0.2 mmol), Mg (10 mg), TMSCl (25  $\mu$ L), 4 Å MS (25 mg) and THF (2 mL). The reaction mixture was stirred under H<sub>2</sub> (50 atm) at 40 °C for 24 h. Then the resulting crude product was purified by column chromatography on silica gel with (PE:EA = 100:1) to afford the title compound as a colorless oil (45 mg, 85% yield, *Z/E* = 98:2). <sup>1</sup>H NMR (400 MHz, CDCl<sub>3</sub>):  $\delta$  7.40–7.35 (m, 5H), 7.35–7.29 (m, 4H), 6.29–6.21 (m, 1H), 5.65–5.54 (m, 1H), 2.25 (qd, *J* = 7.4, 1.6 Hz, 2H), 1.44–1.36 (m, 2H), 1.34–1.25 (m, 7H), 0.89 (t, *J* = 7.0 Hz, 3H); <sup>13</sup>C NMR (100 MHz, CDCl<sub>3</sub>):  $\delta$  141.5, 141.3, 135.9, 133.0, 129.9, 129.9, 128.8, 128.0, 127.0, 126.9, 31.9, 29.9, 29.3, 28.7, 22.8, 14.2. HRMS (ESI, *m/z*): calcd for

C<sub>20</sub>H<sub>25</sub> [M+H]<sup>+</sup>: 265.1951, found: 265.1955.

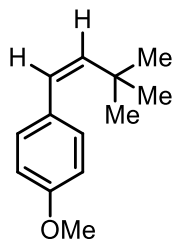

**(Z)-1-(3,3-dimethylbut-1-en-1-yl)-4-methoxybenzene (Z-3av)**

The general procedure was applied to **1b** (8 mg, 0.012 mmol, 6 mol %), 1-(3,3-dimethylbut-1-yn-1-yl)-4-methoxybenzene **2av** (38 mg, 0.2 mmol), Mg (10 mg), TMSCl (25  $\mu$ L), 4 Å MS (25 mg) and THF (2 mL). The reaction mixture was stirred under H<sub>2</sub> (50 atm) at 40 °C for 24 h. Then the resulting crude product was purified by column chromatography on silica gel with (PE:EA = 100:1) to afford the title compound as a colorless oil (34 mg, 90% yield, *Z/E* = 94:6). <sup>1</sup>H NMR (400 MHz, CDCl<sub>3</sub>):  $\delta$  7.10 (d, *J* = 8.6 Hz, 2H), 6.85–6.79 (m, 2H), 6.35 (d, *J* = 12.4 Hz, 1H), 5.56 (d, *J* = 12.8 Hz, 1H), 3.80 (s, 3H), 0.99 (s, 9H); <sup>13</sup>C NMR (100 MHz, CDCl<sub>3</sub>):  $\delta$  158.2, 142.7, 131.8, 130.2, 126.9, 113.1, 55.3, 34.2, 31.4. HRMS (ESI, *m/z*): calcd for C<sub>13</sub>H<sub>19</sub>O [M+H]<sup>+</sup>: 191.1430, found: 191.1431.

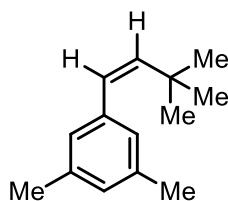

**(Z)-1-(3,3-dimethylbut-1-en-1-yl)-3,5-dimethylbenzene (Z-3aw)**

The general procedure was applied to **1b** (11 mg, 0.016 mmol, 8 mol %), 1-(3,3-dimethylbut-1-yn-1-yl)-3,5-dimethylbenzene **2aw** (37 mg, 0.2 mmol), Mg (10 mg), TMSCl (25  $\mu$ L), 4 Å MS (25 mg) and THF (2 mL). The reaction mixture was stirred under H<sub>2</sub> (50 atm) at 40 °C for 24 h. Then the resulting crude product was purified by column chromatography on silica gel with (PE:EA = 100:1) to afford the title compound as a colorless oil (32 mg, 84% yield, *Z/E* = 86:14). <sup>1</sup>H NMR (400

MHz, CDCl<sub>3</sub>):  $\delta$  6.85 (s, 1H), 6.81 (s, 2H),  $\delta$  6.36 (d,  $J$  = 12.4 Hz, 1H), 5.56 (d,  $J$  = 12.8 Hz, 1H), 2.30 (s, 6H), 1.00 (s, 9H); <sup>13</sup>C NMR (100 MHz, CDCl<sub>3</sub>):  $\delta$  142.34, 139.40, 137.04, 127.84, 127.42, 126.89, 34.32, 31.40, 21.44. HRMS (ESI, m/z): calcd for C<sub>14</sub>H<sub>21</sub> +H]<sup>+</sup>: 189.1638, found: 189.1640.

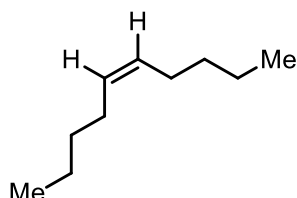

**(Z)-dec-5-ene (Z-3ax)**

The general procedure was applied to **1b** (1 mg, 0.002 mmol, 1 mol %), dec-5-yne **2ax** (28 mg, 0.2 mmol), Mg (10 mg), TMSCl (25  $\mu$ L), 4 Å MS (25 mg) and THF (2 mL). The reaction mixture was stirred under H<sub>2</sub> (40 atm) at 40 °C for 24 h. Then the resulting crude product was purified by column chromatography on silica gel with (PE:EA = 100:1) to afford the title compound as a colorless oil (23 mg, 83% yield,  $Z/E > 99:1$ ). <sup>1</sup>H NMR (400 MHz, CDCl<sub>3</sub>):  $\delta$  5.42–5.28 (m, 2H), 2.08–1.96 (m, 4H), 1.36–1.29 (m, 5H), 0.90 (t,  $J$  = 7.2 Hz, 6H); <sup>13</sup>C NMR (100 MHz, CDCl<sub>3</sub>):  $\delta$  130.0, 32.1, 27.1, 22.5, 14.1. Spectroscopic data are in accordance with those described in the literature.<sup>27</sup>

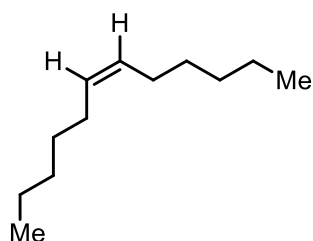

**(Z)-dodec-6-ene (Z-3ay)**

The general procedure was applied to **1b** (1 mg, 0.002 mmol, 1 mol %), dodec-6-yne **2ay** (33 mg, 0.2 mmol), Mg (10 mg), TMSCl (25  $\mu$ L), 4 Å MS (25 mg) and THF (2 mL). The reaction mixture was stirred under H<sub>2</sub> (40 atm) at 40 °C for 24 h. Then the resulting crude product was purified by column chromatography on silica gel with

(PE:EA = 100:1) to afford the title compound as a colorless oil (30 mg, 88% yield, *Z/E* = 99:1). <sup>1</sup>H NMR (400 MHz, CDCl<sub>3</sub>): δ 5.48–5.23 (m, 2H), 2.10–1.91 (m, 4H), 1.38–1.24 (m, 12H), 0.89 (t, *J* = 6.9 Hz, 6H); <sup>13</sup>C NMR (100 MHz, CDCl<sub>3</sub>): δ 130.1, 31.7, 29.6, 27.3, 22.8, 14.2. Spectroscopic data are in accordance with those described in the literature.<sup>12</sup>

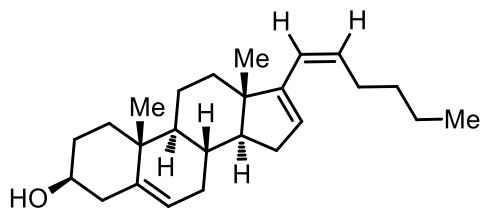

**(3*S*,8*R*,9*S*,10*R*,13*S*,14*S*)-17-((*Z*)-hex-1-en-1-yl)-10,13-dimethyl-2,3,4,7,8,9,10,11,12,13,14,15-dodecahydro-1*H*-cyclopenta[*a*]phenanthren-3-ol (*Z*-3az)**

The general procedure was applied to **1b** (7 mg, 0.01 mmol, 5 mol %), (3*S*,8*R*,9*S*,10*R*,13*S*,14*S*)-17-(hex-1-yn-1-yl)-10,13-dimethyl-2,3,4,7,8,9,10,11,12,13,14,15-dodecahydro-1*H*-cyclopenta[*a*]phenanthren-3-ol **2az** (70 mg, 0.2 mmol), Mg (10 mg), TMSCl (50  $\mu$ L), 4 Å MS (25 mg) and THF (2 mL). The reaction mixture was stirred under H<sub>2</sub> (50 atm) at 40 °C for 24 h. Then the resulting crude product was purified by column chromatography on silica gel with (PE:EA = 10:1) to afford the title compound as a white solid (69 mg, 97% yield, *Z/E* = 99:1). M.p. = 98–110 °C. <sup>1</sup>H NMR (400 MHz, CDCl<sub>3</sub>): δ 5.72 (d, *J* = 11.6 Hz, 1H), 5.65–5.49 (m, 2H), 5.40–5.32 (m, 1H), 3.61–3.45 (m, 1H), 2.33–2.17 (m, 4H), 2.08–1.93 (m, 2H), 1.89–1.81 (m, 2H), 1.76–1.59 (m, 5H), 1.57–1.45 (m, 2H), 1.42–1.25 (m, 7H), 1.15–0.98 (m, 5H), 0.92–0.87 (m, 3H), 0.80 (s, 3H); <sup>13</sup>C NMR (100 MHz, CDCl<sub>3</sub>): δ 151.1, 141.2, 134.3, 126.5, 121.9, 121.7, 71.9, 56.3, 50.9, 47.0, 42.5, 37.3, 36.9, 34.8, 32.2, 32.1, 31.8, 30.7, 29.2, 22.6, 21.0, 19.5, 16.1, 14.1. HRMS (ESI, *m/z*): calcd for C<sub>25</sub>H<sub>39</sub>O [M+H]<sup>+</sup>: 355.2995, found: 355.2986.

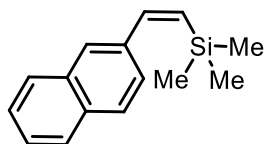

**(Z)-trimethyl(2-(naphthalen-2-yl)vinyl)silane (Z-3ba)**

The general procedure was applied to **1b** (7 mg, 0.01 mmol, 5 mol %), trimethyl(naphthalen-2-ylethynyl)silane **2ba** (45 mg, 0.2 mmol), Mg (10 mg), TMSCl (25  $\mu$ L), 4 Å MS (25 mg) and THF (2 mL). The reaction mixture was stirred under H<sub>2</sub> (50 atm) at 25 °C for 24 h. Then the resulting crude product was purified by column chromatography on silica gel with (PE:EA = 50:1) to afford the title compound as a colorless liquid (39 mg, 86% yield, *Z:E* = 95:5). <sup>1</sup>H NMR (400 MHz, CDCl<sub>3</sub>)  $\delta$  7.90–7.75 (m, 4H), 7.60–7.44 (m, 4H), 6.01–5.95 (m, 1H), 0.15 (d, *J* = 1.2 Hz, 9H); <sup>13</sup>C NMR (100 MHz, CDCl<sub>3</sub>)  $\delta$  146.7, 137.7, 133.5, 133.3, 132.8, 128.1, 127.8, 127.6, 127.2, 126.5, 126.3, 126.0, 0.5. Spectroscopic data are in accordance with those described in the literature.<sup>28</sup>

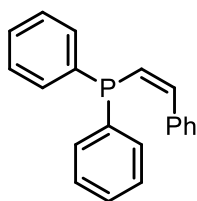

**(Z)-diphenyl(styryl)phosphine (Z-3bb)**

The general procedure was applied to **1b** (7 mg, 0.010 mmol, 5 mol %), diphenyl(phenylethynyl)phosphine **2bb** (57 mg, 0.2 mmol), Mg (10 mg), TMSCl (25  $\mu$ L), 4 Å MS (25 mg) and THF (2 mL). The reaction mixture was stirred under H<sub>2</sub> (50 atm) at r.t. for 24 h. Then the resulting crude product was purified by column chromatography on silica gel with (PE:EA = 50:1) to afford the title compound as a white solid (43 mg, 75% yield, *Z:E* = 95:5). <sup>1</sup>H NMR (400 MHz, CDCl<sub>3</sub>)  $\delta$  7.57–7.45 (m, 6H), 7.41–7.28 (m, 10H), 6.50 (dd, *J* = 12.8, 2.8 Hz, 1H); <sup>13</sup>C NMR (100 MHz, CDCl<sub>3</sub>)  $\delta$  144.2 (d, *J* = 19.1 Hz), 139.4 (d, *J* = 9.5 Hz), 137.0 (d, *J* = 2.3 Hz), 132.8 (d, *J* = 18.8 Hz), 129.7 (d, *J* = 8.3 Hz), 129.6 (d, *J* = 16.0 Hz), 128.7, 128.6, 128.6, 128.2;

$^{31}\text{P}$  NMR (162 MHz,  $\text{CDCl}_3$ )  $\delta$  -24.8. Spectroscopic data are in accordance with those described in the literature.<sup>29</sup>

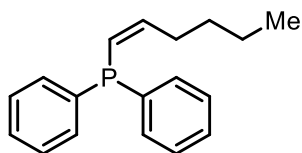

**(Z)-hex-1-en-1-ylidiphenylphosphine (Z-3bc)**

The general procedure was applied to **1b** (3 mg, 0.004 mmol, 2 mol %), hex-1-yn-1-ylidiphenylphosphine **2bc** (53 mg, 0.2 mmol), Mg (10 mg),  $\text{TMSCl}$  (25  $\mu\text{L}$ ), 4 Å MS (25 mg) and THF (2 mL). The reaction mixture was stirred under  $\text{H}_2$  (50 atm) at 40 °C for 24 h. Then the resulting crude product was purified by column chromatography on silica gel with (PE:EA = 50:1) to afford the title compound as a colorless liquid (43 mg, 81% yield,  $Z:E > 99:1$ ).  $^1\text{H}$  NMR (400 MHz,  $\text{CDCl}_3$ )  $\delta$  7.45–7.37 (m, 4H), 7.36–7.27 (m, 6H), 6.44 (ddt,  $J = 23.8, 11.2, 7.2$  Hz, 1H), 6.21–6.14 (m, 1H), 2.46 (td,  $J = 7.2, 1.6$  Hz, 2H), 1.44–1.28 (m, 4H), 0.89 (t,  $J = 7.2$  Hz, 3H);  $^{13}\text{C}$  NMR (100 MHz,  $\text{CDCl}_3$ )  $\delta$  148.2 (d,  $J = 24.4$  Hz), 139.7 (d,  $J = 9.1$  Hz), 132.7 (d,  $J = 18.7$  Hz), 128.5 (d,  $J = 6.5$  Hz), 128.3, 127.8 (d,  $J = 9.0$  Hz), 31.5, 30.94 (d,  $J = 21.1$  Hz), 22.4, 14.1;  $^{31}\text{P}$  NMR (162 MHz,  $\text{CDCl}_3$ )  $\delta$  -31.3. HRMS (ESI,  $m/z$ ): calcd for  $\text{C}_{18}\text{H}_{22}\text{P}$   $[\text{M}+\text{H}]^+$ : 269.1454, found: 269.1446.

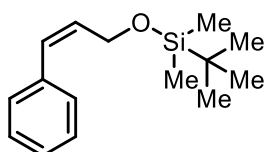

**(Z)-tert-butyl dimethyl((3-phenylallyl)oxy)silane (Z-3bd)**

The general procedure was applied to **1b** (7 mg, 0.01 mmol, 5 mol %), *tert*-butyl dimethyl((3-phenylprop-2-yn-1-yl)oxy)silane **2bd** (49 mg, 0.2 mmol), Mg (10 mg),  $\text{TMSCl}$  (25  $\mu\text{L}$ ), 4 Å MS (25 mg) and THF (2 mL). The reaction mixture was stirred under  $\text{H}_2$  (50 atm) at 40 °C for 24 h. Then the resulting crude product was purified by column chromatography on silica gel with (PE:EA = 50:1) to afford the

title compound as a colorless liquid (38 mg, 76% yield, *Z:E* = 98:2). (Due to the formation of perhydrogenation product, the pure product cannot be separated by column chromatography on silica). <sup>1</sup>H NMR (400 MHz, CDCl<sub>3</sub>) δ 7.38–7.32 (m, 2H), 7.28 (d, *J* = 5.2 Hz, 1H), 7.21 (d, *J* = 7.2 Hz, 2H), 6.52 (d, *J* = 11.8 Hz, 1H), 5.85 (dt, *J* = 11.8, 6.2 Hz, 1H), 4.48 (dd, *J* = 6.2, 1.6 Hz, 2H), 0.92 (s, 9H), 0.08 (s, 6H); <sup>13</sup>C NMR (100 MHz, CDCl<sub>3</sub>) δ 137.0, 132.7, 129.7, 128.9, 128.3, 127.1, 60.5, 26.1, 18.5, -5.0. Spectroscopic data are in accordance with those described in the literature.<sup>30</sup>

## 7. Supplementary Reaction Profile for Hydrogenation of **2a**

### 7. 1 Reaction Profile for *trans*-Hydrogenation of **2a** with Complex **1a**

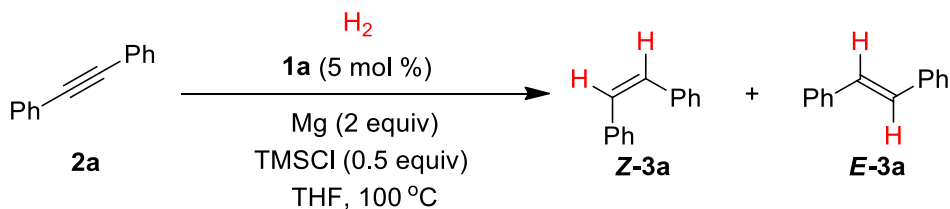

In a high-pressure autoclave was placed a tube containing **1a** (6 mg, 0.01 mmol), **2a** (36 mg, 0.2 mmol), Mg (10 mg), TMSCl (13  $\mu$ L) and THF (2 mL). The reaction mixture was stirred at 100 °C under  $\text{H}_2$  (10 atm). The related yields for **Z-3a** and **E-3a**, and recovery of **2a** were determined by GC analysis using mesitylene as internal standard.



**Supplementary Table S5. Studying Reaction Profile for *trans*-Hydrogenation of 2a with 1a**

| Time (h) | Yield ( <b>Z-3a</b> ) | Yield ( <b>E-3a</b> ) | Recovery ( <b>2a</b> ) |
|----------|-----------------------|-----------------------|------------------------|
| 0.5      | 1.6%                  | 0.4%                  | 98%                    |
| 1        | 8.7%                  | 2.3%                  | 88%                    |
| 2        | 12%                   | 2%                    | 84%                    |
| 4        | 24%                   | 6.8%                  | 68%                    |
| 6        | 38%                   | 11%                   | 49%                    |
| 7        | 36%                   | 34%                   | 26%                    |
| 8        | 36%                   | 57%                   | 5%                     |
| 10       | 33%                   | 65%                   | 0                      |
| 12       | 25%                   | 70%                   | 3%                     |
| 14       | 22%                   | 73%                   | 0                      |
| 16       | 17%                   | 76%                   | 0                      |
| 18       | 15%                   | 82%                   | 0                      |
| 20       | 9%                    | 87%                   | 0                      |
| 22       | 0                     | 91%                   | 0                      |

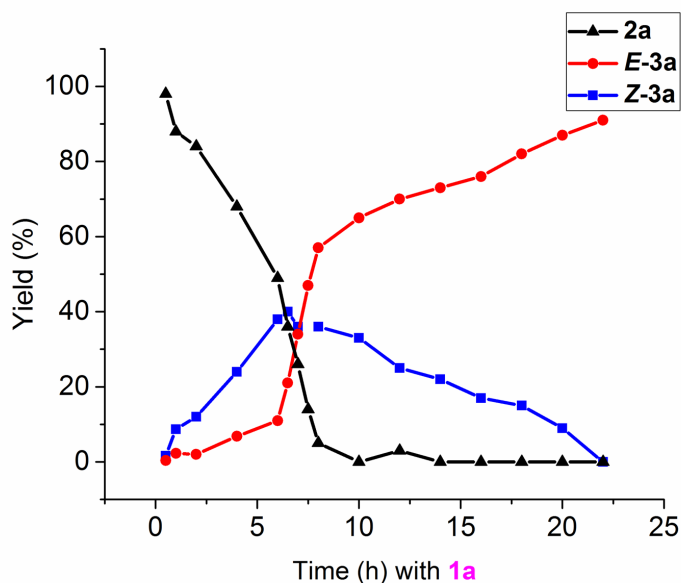

**Supplementary Figure S5. Reaction profile for *trans*-hydrogenation of **2a** with **1a**.**

## 7. 2 Reaction Profile for *cis*-Hydrogenation of **2a** with Complex **1b**

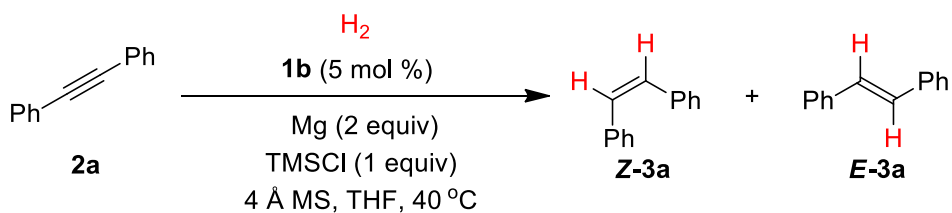

In a high-pressure autoclave was placed a tube containing **1b** (7 mg, 0.01 mmol), **2a** (36 mg, 0.2 mmol), Mg (10 mg), 4 Å MS (25 mg), TMSCl (25  $\mu$ L) and THF (2 mL). The reaction mixture was stirred at 40 °C under H<sub>2</sub> (50 atm). The related yields for **Z-3a** and **E-3a**, and recovery of **2a** were determined by GC analysis using mesitylene as internal standard.

**Supplementary Table S6. Studying Reaction Profile for *cis*-Hydrogenation of 2a with 1b**

| Time (h) | Yield ( <b>Z-3a</b> ) | Yield ( <b>E-3a</b> ) | Recovery ( <b>2a</b> ) |
|----------|-----------------------|-----------------------|------------------------|
| 2        | 3%                    | 0                     | 97%                    |
| 4        | 10%                   | 1%                    | 88%                    |
| 6        | 25%                   | 2%                    | 69%                    |
| 8        | 40%                   | 2%                    | 55%                    |
| 10       | 50%                   | 3%                    | 41%                    |
| 12       | 60%                   | 5%                    | 30%                    |
| 14       | 68%                   | 4%                    | 22%                    |
| 16       | 72%                   | 6%                    | 17%                    |
| 18       | 75%                   | 7%                    | 11%                    |
| 20       | 84%                   | 5%                    | 1%                     |
| 22       | 86%                   | 6%                    | 0                      |

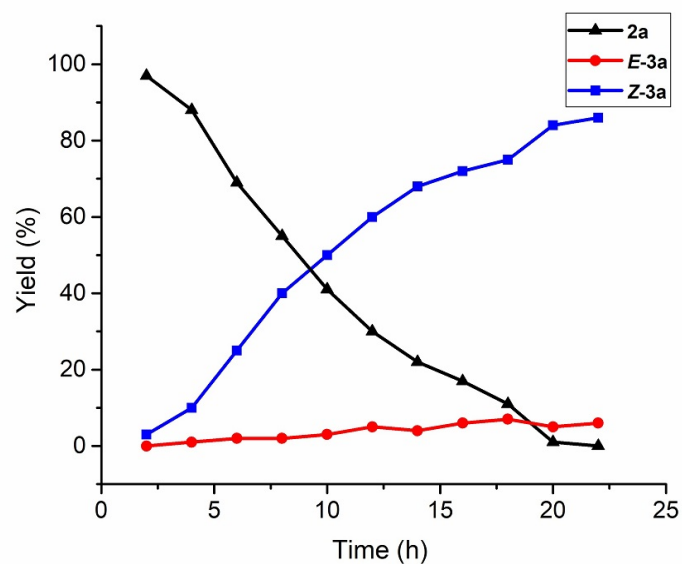

**Supplementary Figure S6. Reaction profile for *cis*-hydrogenation of 2a with 1b.**

## 8. Supplementary Mechanistic Experiments.

### 8.1 *Cis-to-trans* Isomerization with Complex 1a

The hydrogenation was carried out with **1a** (1, 3, 5, 7, 10, 20 mol%), **Z-3a** (36 mg, 0.2 mmol), Mg (10 mg), and TMSCl (13  $\mu$ L) in THF (2 mL). The reaction mixture was stirred at 90 °C under H<sub>2</sub> (10 atm) for 24 h. The related yields for each compounds were determined by GC analysis using mesitylene as internal standard.

**Supplementary Table S7. Studying the Effect of Complex 1a on the Stereoisomerization of Z-3a**

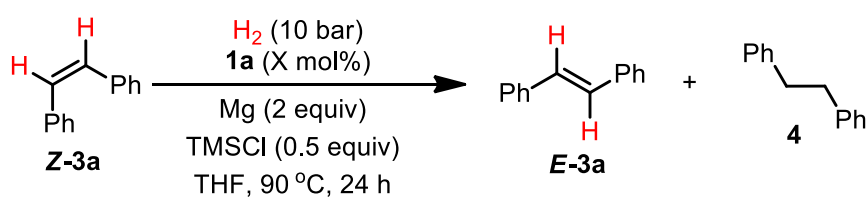

| <b>1a</b> | yield ( <b>E-3a</b> ) | recovery ( <b>Z-3a</b> ) | yield ( <b>4</b> ) |
|-----------|-----------------------|--------------------------|--------------------|
| 1 mol %   | 18%                   | 80%                      | nd                 |
| 3 mol %   | 58%                   | 37%                      | nd                 |
| 5 mol %   | 92%                   | 4%                       | nd                 |
| 7 mol %   | 84%                   | nd                       | 10%                |
| 10 mol %  | 51%                   | nd                       | 46%                |
| 20 mol %  | 12%                   | nd                       | 83%                |

### 8.2 *Cis-to-trans* Isomerization with Complex 1b

The hydrogenation was carried out with **1b** (1, 3, 5, 7, 10, 20 mol%), **Z-3a** (36 mg, 0.2 mmol), Mg (10 mg), and TMSCl (25  $\mu$ L) in THF (2 mL). The reaction mixture was stirred at 40 °C under H<sub>2</sub> (50 atm) for 24 h. The related yields for each compounds were determined by GC analysis using mesitylene as internal standard.

**Supplementary Table S8. Studying the Effect of Complex 1b on the Stereoisomerization of Z-3a**

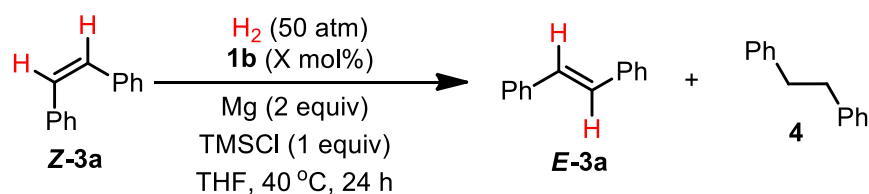

| <b>1b</b> | yield ( <b>E-3a</b> ) | recovery ( <b>Z-3a</b> ) | yield ( <b>4</b> ) |
|-----------|-----------------------|--------------------------|--------------------|
| 1 mol %   | ~2%                   | 97%                      | nd                 |
| 3 mol %   | 7%                    | 91%                      | nd                 |
| 5 mol %   | 11%                   | 85%                      | nd                 |
| 7 mol %   | 14%                   | 79%                      | nd                 |
| 10 mol %  | <2%                   | <2%                      | 74%                |
| 20 mol %  | nd                    | nd                       | 68%                |

**8.3 Preparation and Characterization of the Resting Species IV**

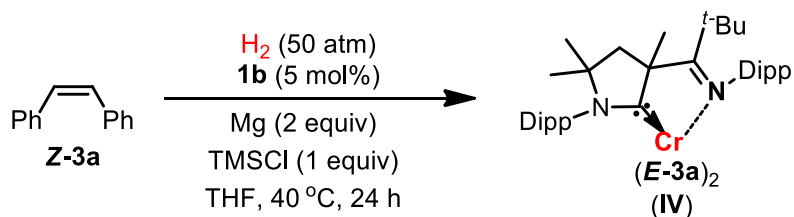

The preparation of the resting species **IV** was carried out with complex **1b** (7 mg, 0.01 mmol, 5 mol %), **Z-3a** (36 mg, 0.2 mmol), Mg (10 mg) and TMSCl (25  $\mu$ L) in THF (2 mL). The reaction mixture was stirred under  $H_2$  (50 atm) at 40 °C for 24 h. After filtration and removal of the volatiles under vacuum, the residue was wash with hexane under atmosphere of nitrogen. The resulting complex was characterized by analysis of  $^1H$  NMR, HRMS and XPS techniques. The formation of resting complex **IV** by ligation of *E*-stereomer with CAAC-imino-Cr in a 2:1 ratio can be considered.  $^1H$  NMR (400 MHz,  $CDCl_3$ ):  $\delta$  7.52 (d,  $J$  = 7.4 Hz, 6H), 7.36 (t,  $J$  = 7.6 Hz, 7H), 7.31–7.28 (m, 3H), 7.23–7.13 (m, 6H), 7.11 (s, 4H,  $C_{olefin}H$ ), 7.09–6.97 (m, 4H), 3.25–3.19 (m, 1H,  $CHMe_2$ ), 3.11–3.06 (m, 1H,  $CHMe_2$ ), 3.01–2.96 (m, 1H,  $CHMe_2$ ), 2.81–2.74 (m, 1H,  $CHMe_2$ ), 2.44 (d,  $J$  = 12.4 Hz, 1H,  $CH_2$ ). HRMS (ESI,  $m/z$ ): calcd

for  $\text{C}_{64}\text{H}_{78}\text{CrN}_2\text{Na}$   $[\text{M}+\text{Na}]^+$ : 949.5462, found: 949.5483.

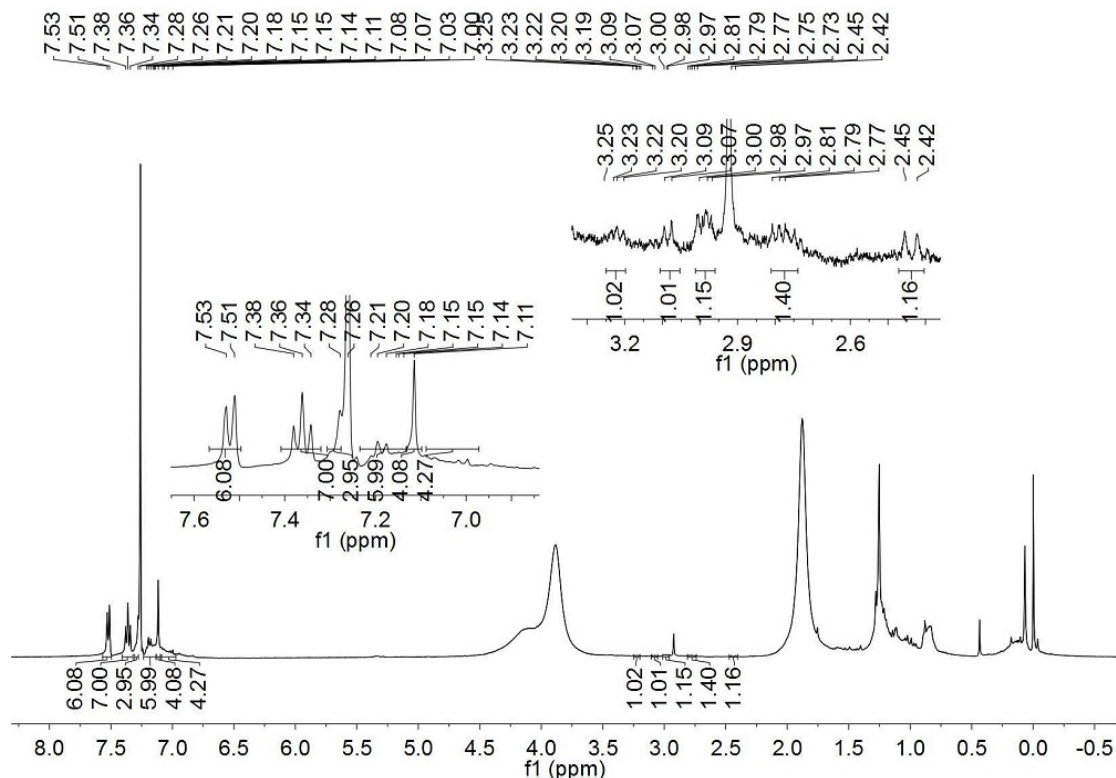

**Supplementary Figure S7.**  $^1\text{H}$  NMR spectrum of the resting species IV (400 MHz,  $\text{CDCl}_3$ ,  $25^\circ\text{C}$ ).

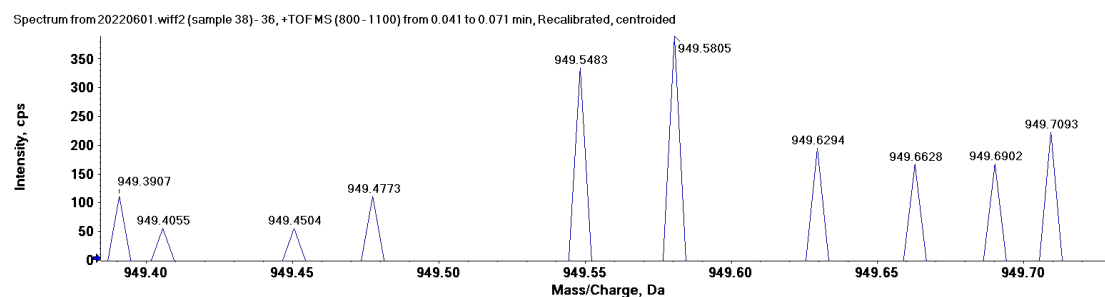

**Supplementary Figure S8.** HMRS analysis ( $\text{ESI}^+$ )

The oxidation state of the Cr species **IV** was analyzed by Cr 2p core-level X-ray photoelectron spectroscopy (XPS), which were fitted with spin-orbital split  $2p_{3/2}$  and  $2p_{1/2}$  components (Figure S8). The related spectrum shows two sets of XPS peaks, with the  $2p_{1/2}$  component appearing at 583.43 eV and the  $2p_{3/2}$  component appearing

at 574.28 eV of the binding energy, respectively. These data are nearly in accordance with that of related binding energies for Cr(0), indicating that the formation of Cr(0) species can be considered.

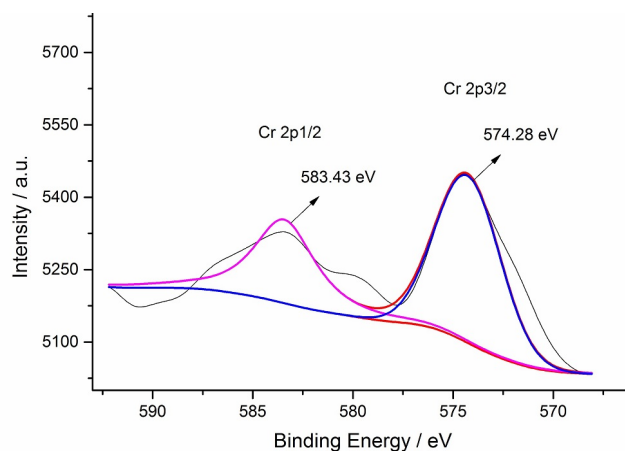

**Supplementary Figure S9. Binding energies of XPS spectra of the resting species IV.**

#### 8.4 The Catalytic Hydrogenation of **2j** with Resting Species **IV**

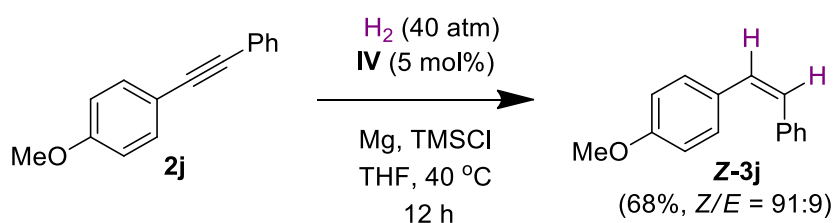

The catalytic activity of the resting species **IV** in the hydrogenation of **2j** was studied. 1-Methoxy-4-(phenylethynyl)benzene **2j** (0.2 mmol, 42 mg) was treated with **IV** (0.01 mmol, 9 mg), Mg (10 mg), TMSCl (25  $\mu\text{L}$ ) under atmosphere of hydrogen (40 atm). The reaction mixture was stirred at 40 °C for 12 h. The formation of Z-selective olefin of **Z-3j** (68% yield, Z/E = 91:9) was observed by GC analysis with mesitylene as internal standard.

## 8.5 Deuterium Experiment for the *cis*-to-*trans* Isomerization

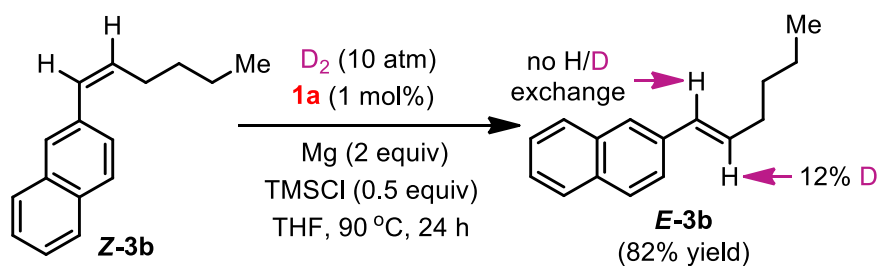

The deuterium experiment of the *cis*-to-*trans* isomerization of **Z-3b** (42 mg, 0.2 mmol) was performed with complex **1a** (1 mg, 0.002 mmol), Mg (10 mg) and TMSCl (13  $\mu$ L) under  $D_2$  (10 atm). The reaction mixture was stirred at 90 °C for 24 h. The resulting crude product was purified by column chromatography on silica gel with (PE:EA = 100:1) to afford **E-3b** in 82% yield. The related  $^1H$  NMR spectrum suggests that no deuterium was incorporated the naphthylated olefinic carbon.

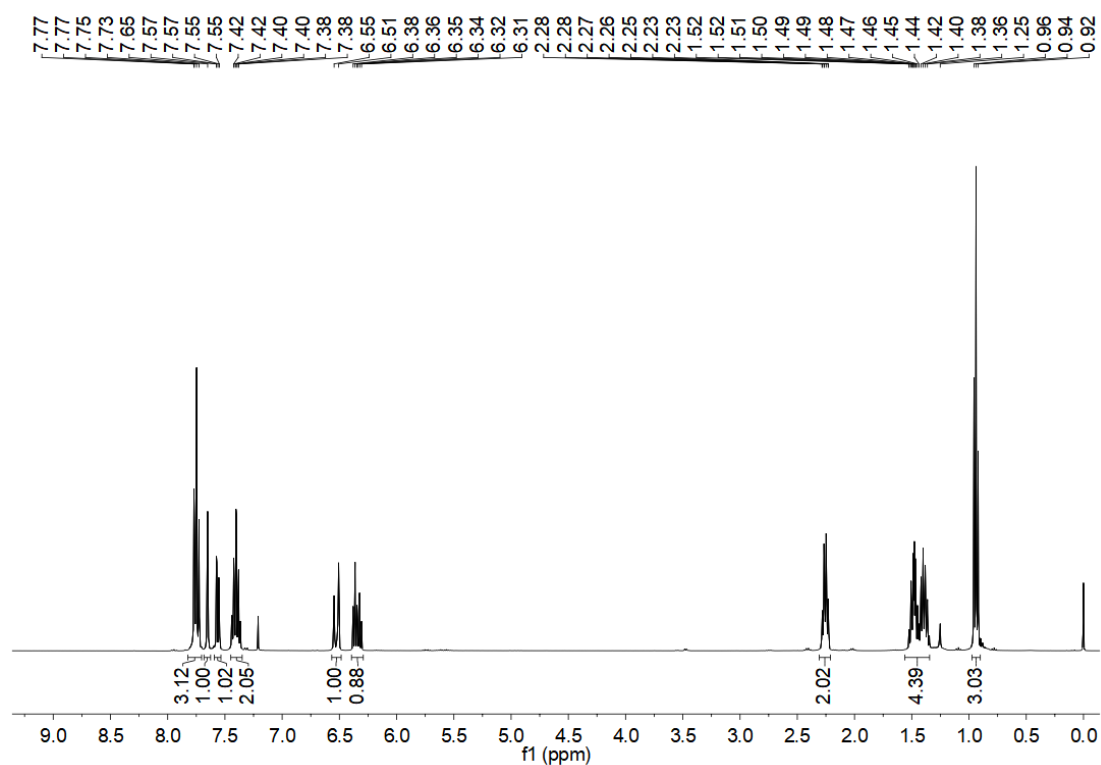

**Supplementary Figure S10.**  $^1H$  NMR spectrum of deuterated compound **E-3b** (400 MHz,  $CDCl_3$ , 25 °C).



## 8.6 The *cis*-to-*trans* Isomerization of Alkene Without Hydrogen.

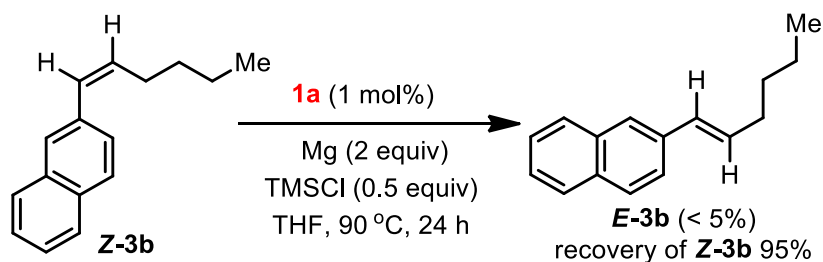

The *cis*-to-*trans* isomerization of **Z-3b** (42 mg, 0.2 mmol) was performed with complex **1a** (1 mg, 0.002 mmol), Mg (10 mg) and TMSCl (13  $\mu$ L). The reaction mixture was stirred at 90 °C for 24 h. The formation of **E-3b** in low yield (<5%) was observed. These results suggest that the metal hydride intermediates may be involved in the reaction.

## 8.7 The Catalytic Hydrogenation of Alkyne Without TMSCl

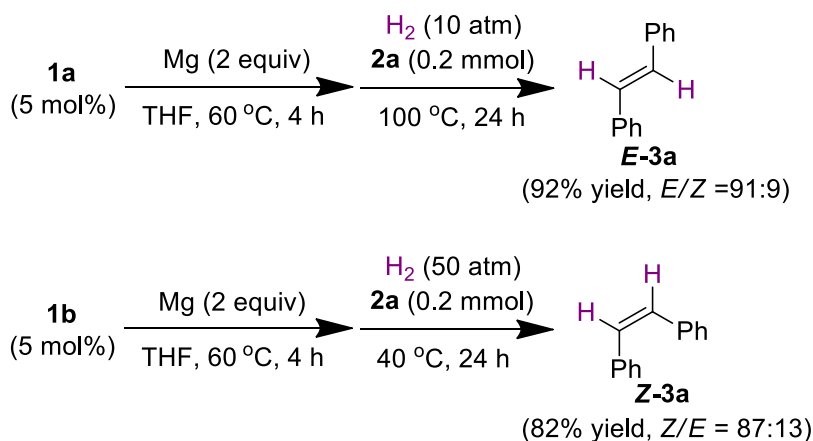

By initially reducing Cr complexes with Mg in forming reactive Cr, we investigated the catalytic hydrogenation of alkynes without the use of TMSCl. In a dried Schlenk tube were placed magnesium (10 mg, 0.4 mmol) and heated to around 400 °C under vacuum for 5 min using a heat gun. After cooling to room temperature, complex **1a** or **1b** (0.01 mmol, 6 or 7 mg) (**1a** and **1b** were prepared and worked up under inert atmosphere) and dry THF (2 mL) was added under atmosphere of nitrogen. After stirring the mixture at 60 °C for 24 h, alkyne **2a** (0.2 mmol, 32 mg) was added and the

mixture was treated with H<sub>2</sub> (1 or 50 atm) at 100 or 40 °C for 24 h. The formation of **E-3a** or **Z-3a** in yield of 92% yield (*E/Z* = 91:9) or 82% yield (*Z/E* = 87:13) was observed, respectively. These results suggest that the *E/Z* selective hydrogenation of alkynes occurs smoothly with reactive Cr species without TMSCl.

### 8.8 The Catalytic Hydrogenation Using the In-Situ Formed Reactive Cr Without Mg

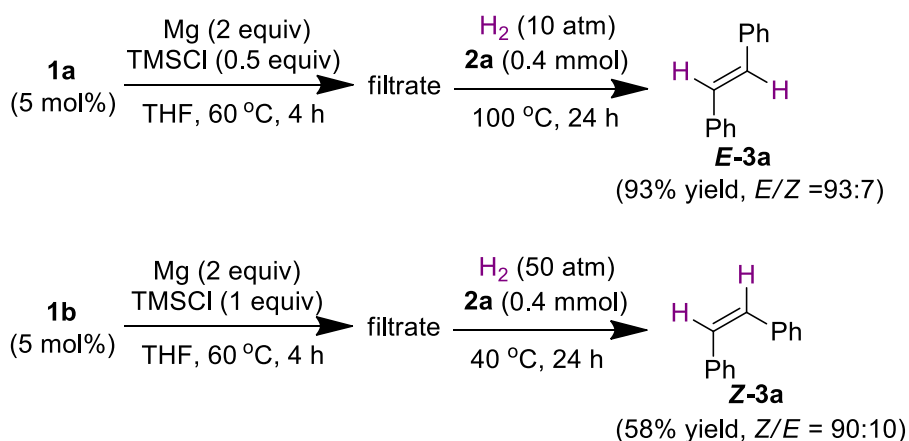

We studied the catalytic hydrogenation of alkynes with the in-situ formed reactive Cr complex without the use of magnesium. In a dried Schlenk tube were placed complex **1a** or **1b** (0.01 mmol, 13 or 14 mg), magnesium (20 mg, 0.8 mmol), TMSCl (25 or 50  $\mu$ L) and dry THF (2 mL) was added under atmosphere of nitrogen. After stirring the mixture at 60 °C for 4 h. The resulting mixture was filtrated under atmosphere of nitrogen, alkyne **2a** (0.4 mmol, 64 mg) was added and the mixture was treated with H<sub>2</sub> (1 or 50 atm) at 100 or 40 °C for 24 h. The formation of **E-3a** or **Z-3a** in yield of 93% yield (*E/Z* = 93:7) or 58% yield (*Z/E* = 90:10) was observed, respectively. These results suggest that the catalytic hydrogenation of alkynes with in-situ formed reactive Cr occurs smoothly without the use of magnesium.

## 8.9 Synthesis of Chromium carbonyl complexes

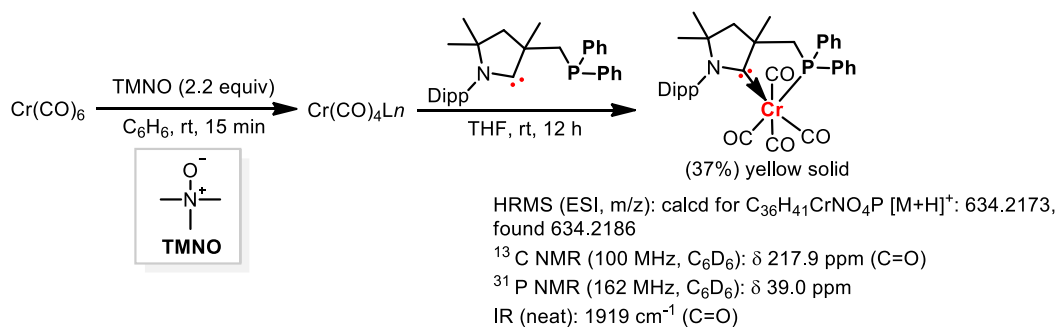

CAAC-phosphino- $\text{Cr(CO)}_4$  was prepared based on the method previously described.<sup>31-33</sup>  $\text{Cr(CO)}_6$  (220 g, 1 mmol) and trimethylamine-*N*-oxide (TMNO) (165 mg, 2.2 mmol) were added to 10 mL of toluene in a dry Schlenk flask and stirred for 15 minutes until the solution turned yellow. The free carbene ((1 mmol, 0.1 M in THF) The free carbene was prepared according to the method for the synthesis of **CAAC-Cr Complex 1a**) solution was transferred to Schlenk tube containing  $\text{Cr(CO)}_4\text{Ln}$  under atmosphere of nitrogen at 0 °C and stirred at room temperature for 12 h. After removal of volatiles under vacuum, the solid was then extracted with DCM (20 mL). After removal of DCM, the solid was washed with hexane (30 mL) to afford a yellow solid (234 mg, 37%). IR (neat)  $\nu$  3434, 2968, 2921, **1919 (C=O)**, 1641, 1462, 1434, 1382, 1117, 804, 667, 652  $\text{cm}^{-1}$ .  $^1\text{H}$  NMR (400 MHz,  $\text{C}_6\text{D}_6$ )  $\delta$  8.25–7.53 (m, 4H), 7.37–7.17 (m, 5H), 7.12–6.80 (m, 4H), 3.86–3.49 (m, 2H), 3.42–2.93 (m, 2H), 2.49 (d,  $J$  = 12.8 Hz, 1H), 1.89 (d,  $J$  = 12.2 Hz, 1H), 1.42–1.32 (m, 3H), 1.32–1.27(m, 3H), 1.26–1.16 (m, 6H), 1.15–1.03 (m, 3H), 0.98–0.79 (m, 6H);  $^{13}\text{C}$  NMR (100 MHz,  $\text{C}_6\text{D}_6$ )  $\delta$  **217.9 (C $\equiv$ O)**;  $^{31}\text{P}$  NMR (162 MHz,  $\text{C}_6\text{D}_6$ )  $\delta$  **39.0**. HRMS (ESI, m/z): calcd for  $\text{C}_{36}\text{H}_{41}\text{CrNO}_4\text{P}$   $[\text{M}+\text{H}]^+$ : 634.2173, found 634.2186.

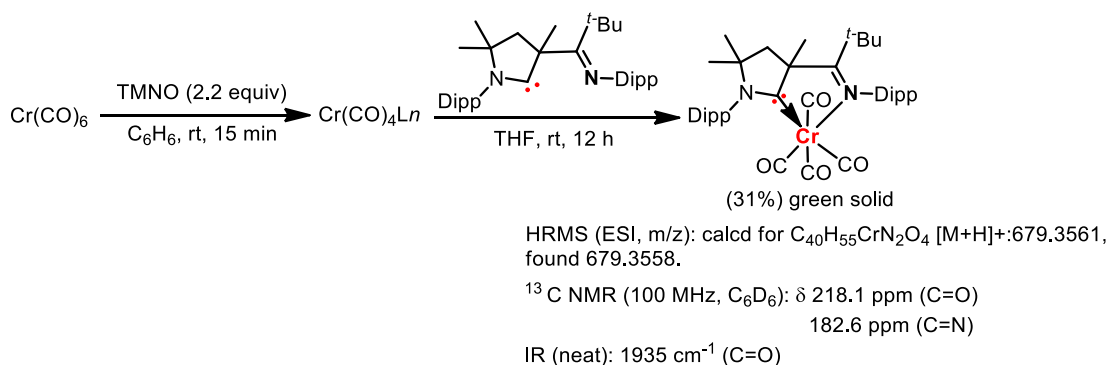

CAAC-imino- $\text{Cr(CO)}_4$  was prepared based on the method previously described.<sup>31-33</sup>  $\text{Cr(CO)}_6$  (220 g, 1 mmol) and trimethylamine-*N*-oxide (TMNO) (165 mg, 2.2 mmol) were added to 10 mL of toluene in a dry Schlenk flask and stirred for 15 minutes until the solution turned yellow. The free carbene ((1 mmol, 0.1 M in THF) The free carbene was prepared according to the method for the synthesis of **CAAC-Cr Complex 1b**) solution was transferred to Schlenk tube containing  $\text{Cr(CO)}_4\text{Ln}$  under atmosphere of nitrogen at 0 °C and stirred at room temperature for 12 h. After removal of volatiles under vacuum, the solid was then extracted with DCM (20 mL). After removal of DCM, the solid was washed with hexane (30 mL) to afford a green solid (210 mg, 31%). IR (neat)  $\nu$  3436, 2966, 2870, **1935 (C=O)**, 1637, 1465, 1384, 1305, 1124, 1084, 1063, 1035, 937, 808, 534, 522  $\text{cm}^{-1}$ . <sup>1</sup>H NMR (400 MHz,  $\text{C}_6\text{D}_6$ )  $\delta$  7.11–6.86 (m, 5H), 6.83–6.69 (s, 1H), 3.16–2.90 (m, 1H), 2.73–2.58 (m, 2H), 2.46–2.33 (m, 1H), 2.17–2.10 (m, 1H), 1.85–1.71 (m, 1H), 1.50–1.36 (m, 6H), 1.35–1.03 (m, 26H), 1.00–0.85 (m, 6H), 0.55 (s, 3H); <sup>13</sup>C NMR (100 MHz,  $\text{C}_6\text{D}_6$ )  $\delta$  **218.1 (C=O)**, **182.6 (C=N)**. HRMS (ESI, m/z): calcd for  $\text{C}_{40}\text{H}_{55}\text{CrN}_2\text{O}_4$  [M+H]<sup>+</sup>: 679.3561, found 679.3558.

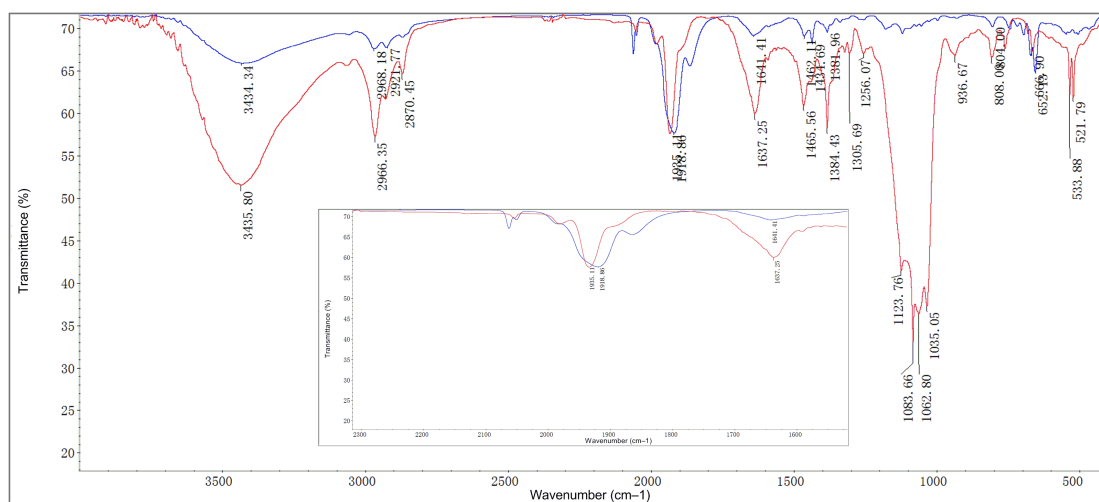

**Supplementary Figure S11. IR spectra of (CAAC-phosphino-Cr(CO)<sub>4</sub>) (blue line) and CAAC-imino-Cr(CO)<sub>4</sub> (red line)**

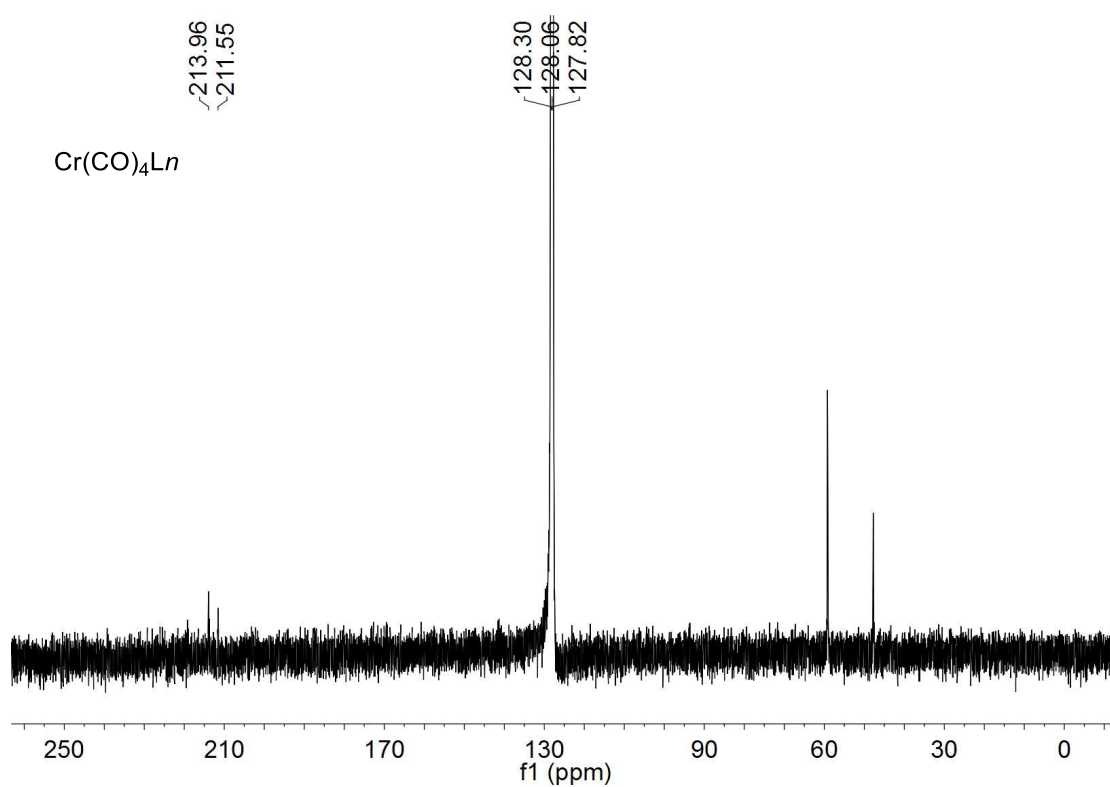

**Supplementary Figure S12. <sup>13</sup>C NMR spectrum for complex of Cr(CO)<sub>4</sub>L<sub>n</sub> (100 MHz, CDCl<sub>3</sub>, 25 °C).**

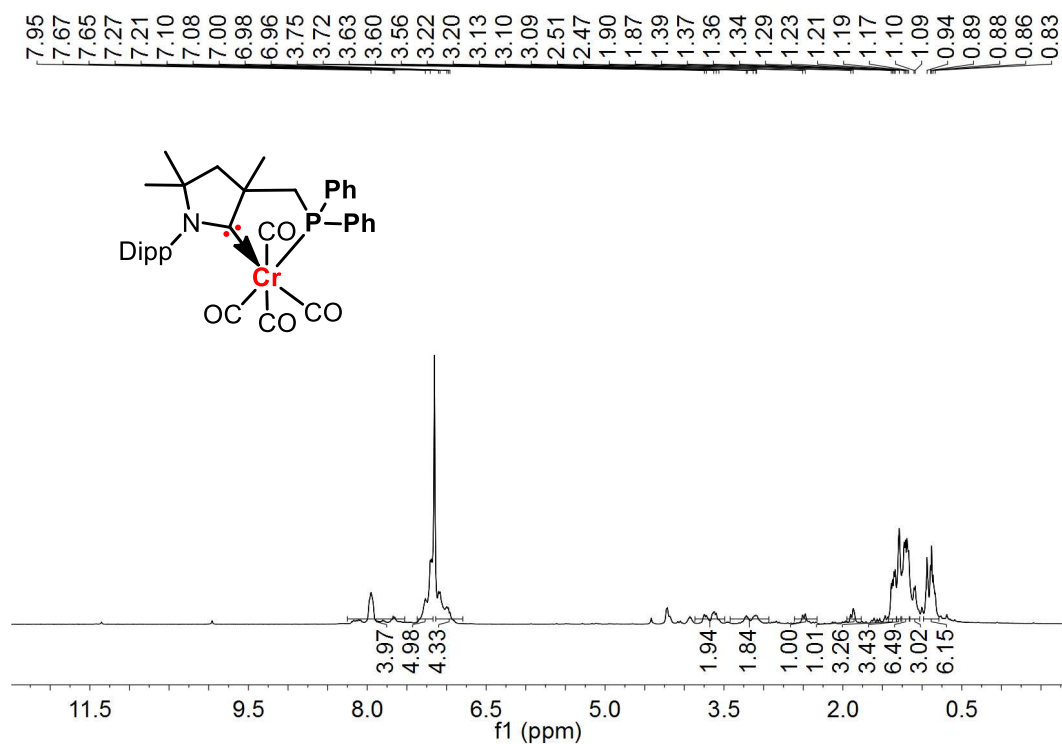

Supplementary Figure S13.  $^1\text{H}$  NMR spectrum for complex of CAAC-phosphino- $\text{Cr}(\text{CO})_4$  (400 MHz,  $\text{CDCl}_3$ , 25 °C).

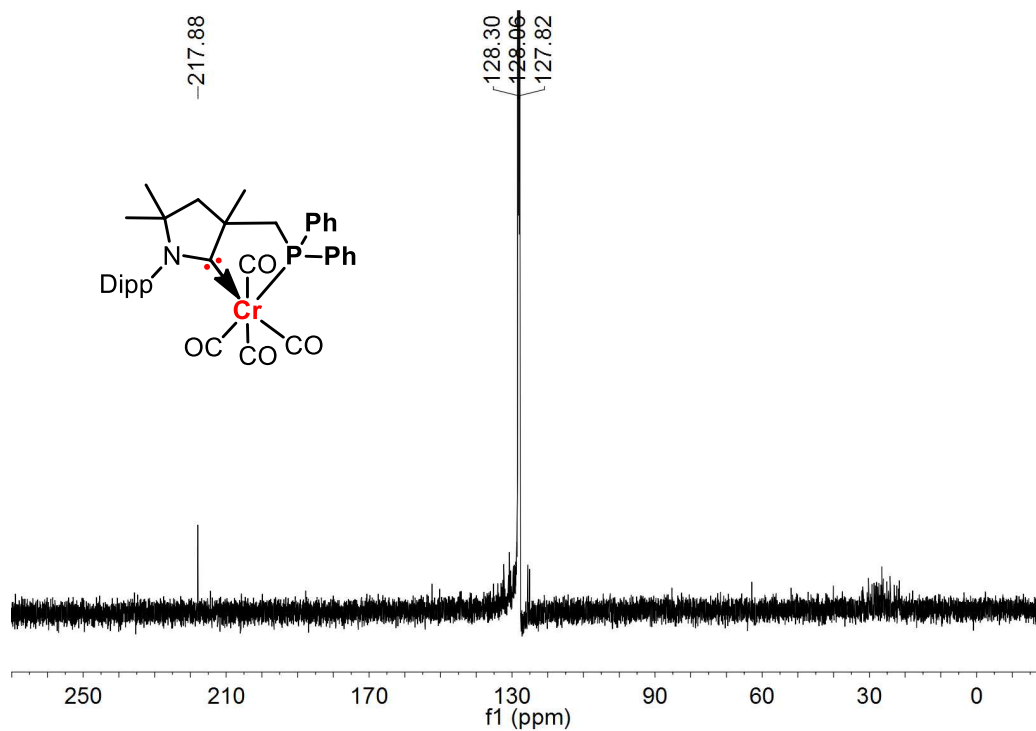

Supplementary Figure S14.  $^{13}\text{C}$  NMR spectrum for complex of CAAC-phosphino- $\text{Cr}(\text{CO})_4$  (100 MHz,  $\text{CDCl}_3$ , 25 °C).

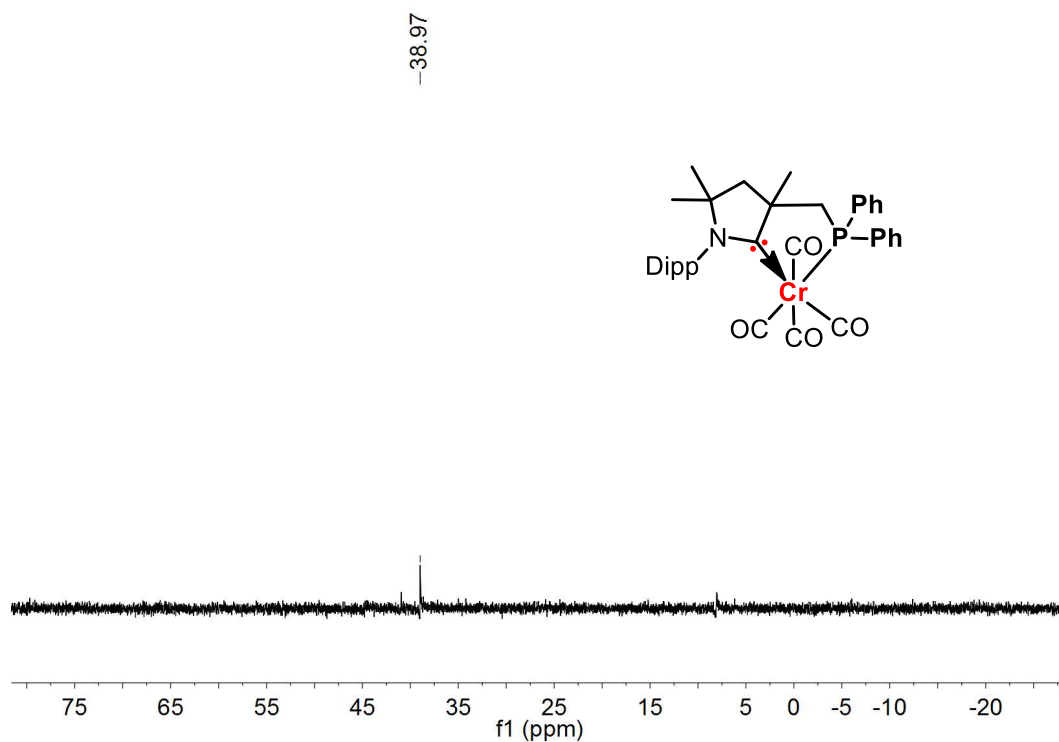

**Supplementary Figure S15.  $^{31}\text{P}$  NMR spectrum for complex of CAAC-phosphino  $-\text{Cr}(\text{CO})_4$  (162 MHz,  $\text{CDCl}_3$ , 25  $^\circ\text{C}$ ).**

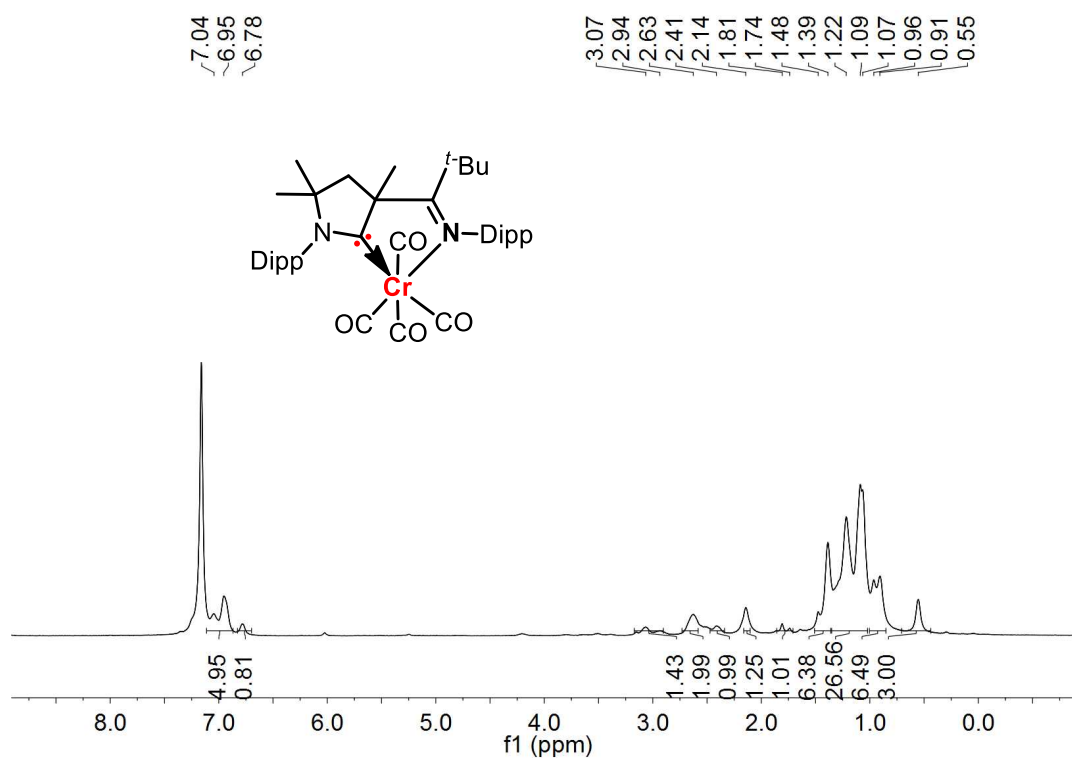

**Supplementary Figure S16.  $^1\text{H}$  NMR spectrum for complex of CAAC-imino  $-\text{Cr}(\text{CO})_4$  (400 MHz,  $\text{CDCl}_3$ , 25  $^\circ\text{C}$ ).**

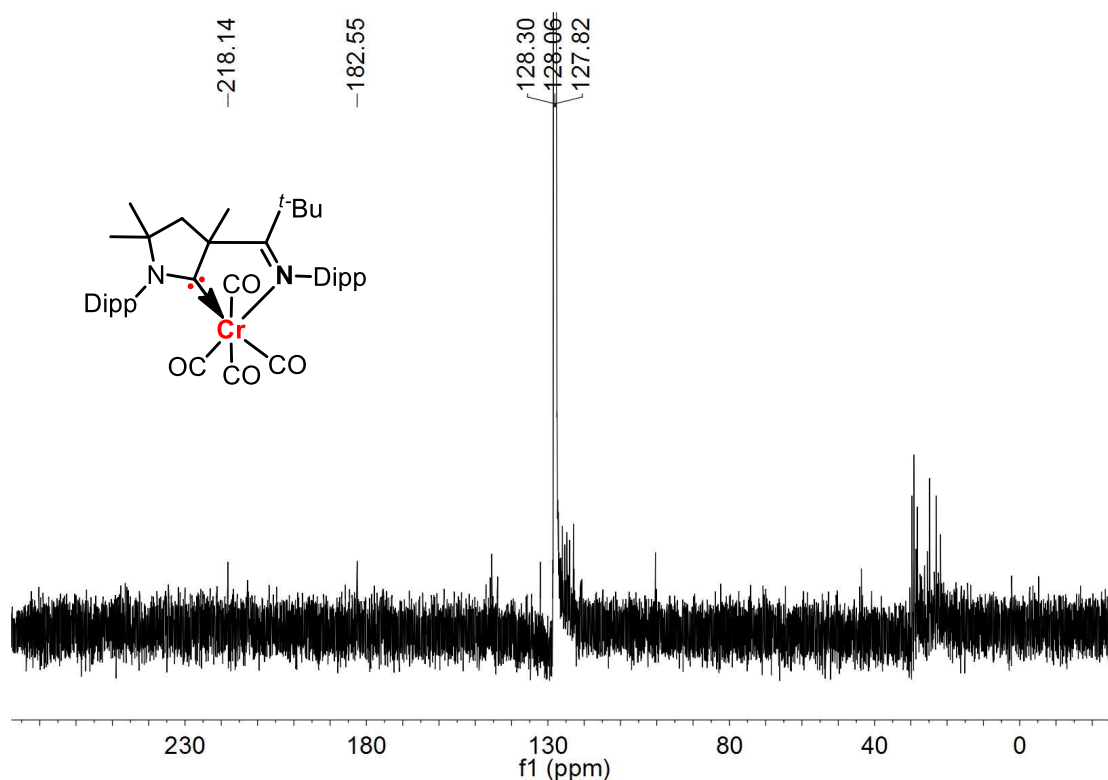

Supplementary Figure S17.  $^{13}\text{C}$  NMR spectrum for complex of CAAC-imino- $\text{Cr}(\text{CO})_4$  (100 MHz,  $\text{CDCl}_3$ , 25  $^\circ\text{C}$ ).

### 8.10 Discussion of the effect of ligands on hydrogenation of alkynes.

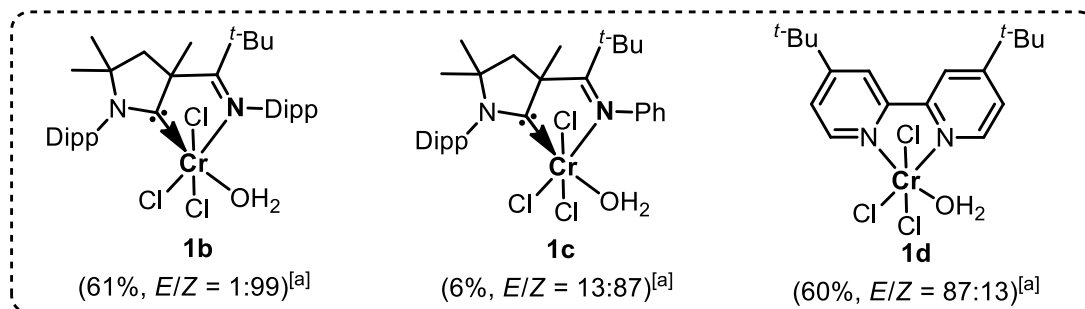

The phosphino-containing complex **1a** shows the ability in promoting the addition of hydrogen to alkyne in a *trans*-selective manner, forming *E*-stilbene (**E-3a**) in up to 99:1 *E/Z* selectivity. By contrast, complex **1b** that contains an imino anchor in CAAC ligand is able to switch the stereoselectivity in alkyne hydrogenation to give 99:1 *Z/E* selectivity. The replacement of 2,6-di-isopropylphenyl substituent of imino in CAAC ligand (**1b**) by phenyl group (**1c**) led to low *Z*-selectivity and conversion in the alkyne



hydrogenation. These differences with these ligands may ascribe to the different steric and electronic effect that are caused by the two imino scaffolds. Hydrogenation of alkyne by using 4,4'-di-*tert*-butylbipyridine as ligand (**1d**) formed *E*-stereomer as major product (see Table S1).

## 9. Supplementary Synthetic Applications in Accessing Functionalized *E*- and *Z*-olefin Derivatives

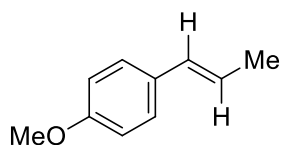

### (*E*)-1-methoxy-4-(prop-1-en-1-yl)benzene (*E*-5)

The general procedure was applied to **1a** (32 mg, 0.05 mmol, 0.5 mol %), 1-methoxy-4-(prop-1-yn-1-yl)benzene **4** (1.46 g, 10 mmol), Mg (48 mg), TMSCl (127  $\mu$ L) and THF (60 mL). The reaction mixture was stirred under H<sub>2</sub> (15 atm) at 100 °C for 48 h. Then the resulting crude product was purified by column chromatography on silica gel with (PE:EA = 100:1) to afford the title compound as a yellow liquid (1.36 g, 92% yield, *E/Z* = 97:3). <sup>1</sup>H NMR (400 MHz, CDCl<sub>3</sub>):  $\delta$  7.25–7.16 (m, 2H), 6.84–6.71 (m, 2H), 6.30 (dd, *J* = 15.8, 1.6 Hz, 1H), 6.11–5.98 (m, 1H), 3.75 (s, 3H), 1.81 (dd, *J* = 6.6, 1.8 Hz, 3H); <sup>13</sup>C NMR (100 MHz, CDCl<sub>3</sub>):  $\delta$  158.7, 131.0, 130.5, 127.0, 123.6, 114.0, 55.4, 18.5. Spectroscopic data are in accordance with those described in the literature.<sup>34</sup>

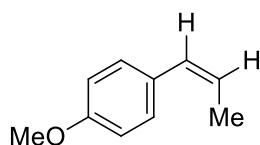

### (*Z*)-1-methoxy-4-(prop-1-en-1-yl)benzene (*Z*-5)

The general procedure was applied to **1b** (35 mg, 0.05 mmol, 0.5 mol %), 1-methoxy-4-(prop-1-yn-1-yl)benzene **4** (1.46 g, 10 mmol), Mg (48 mg), TMSCl (127

$\mu\text{L}$ ), 4 Å MS (1 g) and THF (60 mL). The reaction mixture was stirred under  $\text{H}_2$  (50 atm) at 40 °C for 24 h. Then the resulting crude product was purified by column chromatography on silica gel with (PE:EA = 100:1) to afford the title compound as a colorless oil (1.42 g, 96% yield,  $Z/E$  = 95:5).  $^1\text{H}$  NMR (400 MHz,  $\text{CDCl}_3$ ):  $\delta$  7.30–7.19 (m, 2H), 6.94–6.83 (m, 2H), 6.37 (dt,  $J$  = 12.8, 6.2 Hz, 1H), 5.70 (dq,  $J$  = 11.6, 7.2 Hz, 1H), 3.82 (s, 3H), 1.90 (dd,  $J$  = 7.2, 1.8 Hz, 3H);  $^{13}\text{C}$  NMR (100 MHz,  $\text{CDCl}_3$ ):  $\delta$  158.2, 130.5, 130.1, 129.4, 125.3, 113.7, 55.4, 14.7. Spectroscopic data are in accordance with those described in the literature.<sup>35</sup>

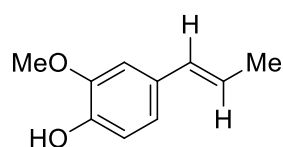

**(*E*)-2-methoxy-4-(prop-1-en-1-yl)phenol (*E*-7)**

The general procedure was applied to **1a** (32 mg, 0.05 mmol, 0.5 mol %), 2-methoxy-4-(prop-1-yn-1-yl)phenol **6** (1.62 g, 10 mmol), Mg (288 mg),  $\text{TMSCl}$  (1.39 mL) and THF (60 mL). The reaction mixture was stirred under  $\text{H}_2$  (15 atm) at 100 °C for 48 h. Then the resulting crude product was purified by column chromatography on silica gel with (PE:EA = 100:1) to afford the title compound as a yellow liquid (1.43 g, 87% yield,  $E/Z$  = 98:2).  $^1\text{H}$  NMR (400 MHz,  $\text{CDCl}_3$ ):  $\delta$  6.87–6.80 (m, 3H), 6.36–6.28 (m, 1H), 6.07 (dq,  $J$  = 15.8, 6.6 Hz, 1H), 5.55 (s, 1H), 3.90 (s, 3H), 1.86 (dd,  $J$  = 6.6, 1.8 Hz, 3H);  $^{13}\text{C}$  NMR (100 MHz,  $\text{CDCl}_3$ ):  $\delta$  146.7, 144.9, 130.9, 130.8, 123.6, 119.5, 114.5, 108.0, 56.0, 18.5. Spectroscopic data are in accordance with those described in the literature.<sup>34</sup>

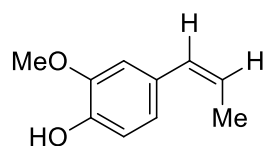

**(*Z*)-2-methoxy-4-(prop-1-en-1-yl)phenol (*Z*-7)**

The general procedure was applied to **1b** (35 mg, 0.05 mmol, 0.5 mol %), 2-methoxy-4-(prop-1-yn-1-yl)phenol **6** (1.62 g, 10 mmol), Mg (288 mg), TMSCl (1.39 mL), 4 Å MS (1 g) and THF (60 mL). The reaction mixture was stirred under H<sub>2</sub> (50 atm) at 40 °C for 24 h. Then the resulting crude product was purified by column chromatography on silica gel with (PE:EA = 10:1) to afford the title compound as a colorless oil (1.38 g, 84% yield, *Z/E* = 94:6). <sup>1</sup>H NMR (400 MHz, CDCl<sub>3</sub>): δ 6.91–6.88 (m, 1H), 6.85–6.80 (m, 2H), 6.41–6.30 (m, 1H), 5.70 (dq, *J* = 11.6, 7.2 Hz, 1H), 5.58 (s, 1H), 3.89 (s, 3H), 1.90 (dd, *J* = 7.2, 1.8 Hz, 3H); <sup>13</sup>C NMR (100 MHz, CDCl<sub>3</sub>): δ 146.3, 144.4, 130.2, 129.8, 125.3, 122.2, 114.2, 111.6, 56.0, 14.8. HRMS (ESI, *m/z*): calcd for C<sub>10</sub>H<sub>13</sub>O<sub>2</sub> [M+H]<sup>+</sup>: 165.0910, found: 165.0905.

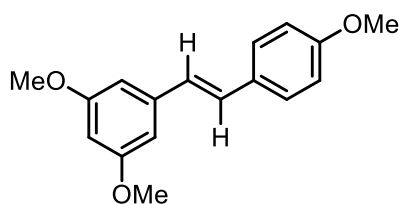

**(*E*)-1,3-dimethoxy-5-((4-methoxystyryl)benzene (*E*-9)**

The general procedure was applied to **1a** (6 mg, 0.01 mmol, 5 mol %), 1,3-dimethoxy-5-((4-methoxyphenyl)ethynyl)benzene **8** (54 mg, 0.2 mmol), Mg (10 mg), TMSCl (13  $\mu$ L) and THF (2 mL). The reaction mixture was stirred under H<sub>2</sub> (10 atm) at 90 °C for 24 h. Then the resulting crude product was purified by column chromatography on silica gel with (PE:EA = 20:1) to afford the title compound as a white solid (52 mg, 93% yield, *E/Z* = 99:1). <sup>1</sup>H NMR (400 MHz, CDCl<sub>3</sub>): δ 7.49–7.42 (d, *J* = 8.7 Hz, 2H), 7.05 (d, *J* = 16.4 Hz, 1H), 6.95–6.87 (m, 3H), 6.67 (d, *J* = 2.2 Hz, 2H), 6.39 (t, *J* = 2.2 Hz, 1H), 3.84 (s, 6H), 3.83 (s, 3H); <sup>13</sup>C NMR (100 MHz, CDCl<sub>3</sub>): δ 161.1, 159.5, 139.8, 130.0, 128.9, 127.9, 126.7, 114.3, 104.5, 99.7, 55.5, 55.4. Spectroscopic data are in accordance with those described in the literature.<sup>36</sup>

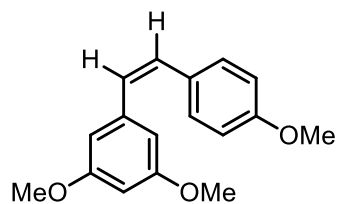

**(Z)-1,3-dimethoxy-5-(4-methoxystyryl)benzene (Z-9)**

The general procedure was applied to **1b** (7 mg, 0.01 mmol, 5 mol %), 1,3-dimethoxy-5-((4-methoxyphenyl)ethynyl)benzene **8** (54 mg, 0.2 mmol), Mg (10 mg), TMSCl (25  $\mu$ L), 4 Å MS (25 mg) and THF (2 mL). The reaction mixture was stirred under H<sub>2</sub> (50 atm) at 40 °C for 24 h. Then the resulting crude product was purified by column chromatography on silica gel with (PE:EA = 20:1) to afford the title compound as a colorless oil (47 mg, 88% yield, *Z/E* = 99:1). <sup>1</sup>H NMR (400 MHz, CDCl<sub>3</sub>):  $\delta$  7.25–7.17 (m, 2H), 6.81–7.75 (m, 2H), 6.53 (d, *J* = 12.4 Hz, 1H), 6.48–6.41 (m, 3H), 6.33 (t, *J* = 2.4 Hz, 1H), 3.78 (s, 3H), 3.67 (s, 6H); <sup>13</sup>C NMR (100 MHz, CDCl<sub>3</sub>):  $\delta$  160.7, 158.9, 139.6, 130.4, 130.3, 129.7, 128.8, 113.7, 106.8, 99.8, 55.4. Spectroscopic data are in accordance with those described in the literature.<sup>36</sup>

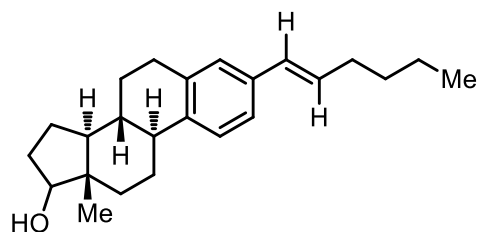

**(8R,9S,13S,14S)-3-((E)-hex-1-en-1-yl)-13-methyl-7,8,9,11,12,13,14,15,16,17-decahydro-6H-cyclopenta[*a*]phenanthren-17-ol (E-11)**

The general procedure was applied to **1a** (6 mg, 0.01 mmol, 5 mol %), (8R,9S,13S,14S)-3-(hex-1-yn-1-yl)-13-methyl-7,8,9,11,12,13,14,15,16,17-decahydro-6H-cyclopenta[*a*]phenanthren-17-ol **10** (67 mg, 0.2 mmol), Mg (10 mg), TMSCl (38  $\mu$ L) and THF (2 mL). The reaction mixture was stirred under H<sub>2</sub> (10 atm) at 100 °C for 24 h. Then the resulting crude product was purified by column chromatography on silica gel with (PE:EA = 10:1) to afford the title compound as a white solid (57 mg,

84% yield, *E/Z* = 95:5). M.p. = 62–64 °C. (Due to the formation of perhydrogenation product, the pure product cannot be separated by column chromatography on silica). <sup>1</sup>H NMR (400 MHz, CDCl<sub>3</sub>): δ 7.22 (t, *J* = 7.0 Hz, 1H), 7.16–6.88 (m, 2H), 6.33 (d, *J* = 15.6 Hz, 1H), 6.17 (dt, *J* = 15.8, 6.8 Hz, 1H), 3.74 (t, *J* = 8.4 Hz, 1H), 2.91–2.79 (m, 2H), 2.38–2.29 (m, 1H), 2.27–2.09 (m, 3H), 1.99–1.85 (m, 2H), 1.75–1.53 (m, 3H), 1.51–1.41 (m, 4H), 1.39–1.26 (m, 6H), 1.24–1.15 (m, 1H), 0.93 (t, *J* = 7.2 Hz, 3H), 0.79 (s, 3H); <sup>13</sup>C NMR (101 MHz, CDCl<sub>3</sub>): δ 139.1, 136.8, 135.5, 130.6, 129.6, 126.6, 125.6, 123.4, 82.0, 50.3, 44.5, 43.4, 38.8, 36.9, 32.9, 31.7, 30.7, 29.7, 27.4, 26.3, 23.3, 22.4, 14.1, 11.2. HRMS (ESI, *m/z*): calcd for C<sub>24</sub>H<sub>35</sub>O [M+H]<sup>+</sup>: 339.2682, found: 339.2679.

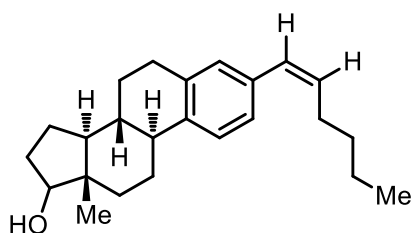

**(8*R*,9*S*,13*S*,14*S*)-3-((*Z*)-hex-1-en-1-yl)-13-methyl-7,8,9,11,12,13,14,15,16,17-decahydro-6*H*-cyclopenta[*a*]phenanthren-17-ol (*Z*-11)**

The general procedure was applied to **1b** (7 mg, 0.01 mmol, 5 mol %), (8*R*,9*S*,13*S*,14*S*)-3-(hex-1-yn-1-yl)-13-methyl-7,8,9,11,12,13,14,15,16,17-decahydro-6*H*-cyclopenta[*a*]phenanthren-17-ol **10** (67 mg, 0.2 mmol), Mg (10 mg), TMSCl (50  $\mu$ L), 4 Å MS (25 mg) and THF (2 mL). The reaction mixture was stirred under H<sub>2</sub> (50 atm) at 40 °C for 24 h. Then the resulting crude product was purified by column chromatography on silica gel with (PE:EA = 10:1) to afford the title compound as a colorless oil (51 mg, 76% yield, *Z/E* = 99:1). <sup>1</sup>H NMR (400 MHz, CDCl<sub>3</sub>): δ 7.25 (d, *J* = 8.0 Hz, 1H), 7.08 (d, *J* = 8.4 Hz, 1H), 6.99 (s, 1H), 6.33 (d, *J* = 11.6 Hz, 1H), 5.61 (dt, *J* = 11.6, 7.2 Hz, 1H), 3.73 (t, *J* = 8.4 Hz, 1H), 2.96–2.74 (m, 2H), 2.38–2.30 (m, 2H), 2.28–2.17 (m, 1H), 2.18–2.07 (m, 1H), 2.00–1.84 (m, 2H), 1.76–1.59 (m, 2H), 1.54–1.16 (m, 12H), 0.91 (t, *J* = 7.2 Hz, 3H), 0.78 (s, 3H); <sup>13</sup>C NMR (100 MHz,

CDCl<sub>3</sub>):  $\delta$  138.7, 136.5, 135.3, 132.8, 129.5, 128.5, 126.2, 125.2, 82.0, 50.3, 44.5, 43.4, 38.8, 36.9, 32.4, 30.7, 29.7, 28.6, 27.4, 26.2, 23.3, 22.6, 14.2, 11.2. HRMS (ESI,  $m/z$ ): calcd for C<sub>24</sub>H<sub>35</sub>O [M+H]<sup>+</sup>: 339.2682, found: 339.2678.

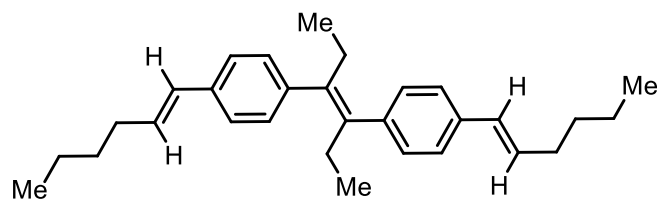

**(*E*)-4,4'-((*E*)-hex-3-ene-3,4-diyl)bis(((*E*)-hex-1-en-1-yl)benzene) (*E*-13)**

The general procedure was applied to **1a** (6 mg, 0.01 mmol, 5 mol %), (*E*)-4,4'-(hex-3-ene-3,4-diyl)bis(hex-1-yn-1-ylbenzene) **12** (79 mg, 0.2 mmol), Mg (10 mg), TMSCl (13  $\mu$ L) and THF (2 mL). The reaction mixture was stirred under H<sub>2</sub> (10 atm) at 100 °C for 24 h. Then the resulting crude product was purified by column chromatography on silica gel with (PE:EA = 100:1) to afford the title compound as a white solid (61 mg, 76% yield, *E/Z* > 99:1). M.p. = 39–41 °C. <sup>1</sup>H NMR (400 MHz, CDCl<sub>3</sub>):  $\delta$  7.36 (d, *J* = 8.0 Hz, 4H), 7.15 (d, *J* = 8.0 Hz, 4H), 6.42 (d, *J* = 16.0 Hz, 2H), 6.27 (dt, *J* = 16.0, 6.8 Hz, 2H), 2.24 (q, *J* = 7.4 Hz, 4H), 2.16 (q, *J* = 7.4 Hz, 4H), 1.53–1.36 (m, 8H), 0.95 (t, *J* = 7.2 Hz, 6H), 0.78 (t, *J* = 7.2 Hz, 6H); <sup>13</sup>C NMR (100 MHz, CDCl<sub>3</sub>):  $\delta$  141.4, 139.2, 136.0, 130.8, 129.7, 129.1, 125.7, 32.9, 31.8, 28.6, 22.4, 14.1, 13.5. HRMS (ESI,  $m/z$ ): calcd for C<sub>30</sub>H<sub>41</sub> [M+H]<sup>+</sup>: 401.3203, found: 401.3239.

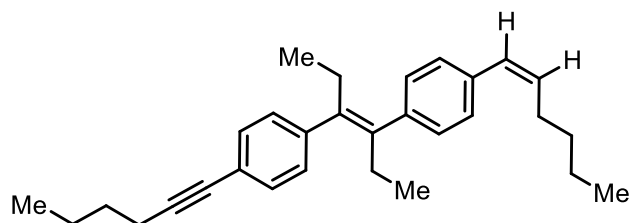

**1-((*Z*)-hex-1-en-1-yl)-4-((*E*)-4-(4-(hex-1-yn-1-yl)phenyl)hex-3-en-3-yl)benzene (*Z*-13)**

The general procedure was applied to **1b** (7 mg, 0.01 mmol, 5 mol %),

(*E*)-4,4'-(hex-3-ene-3,4-diyl)bis(hex-1-yn-1-ylbenzene) **12** (79 mg, 0.2 mmol), Mg (10 mg), TMSCl (25  $\mu$ L), 4 Å MS (25 mg) and THF (2 mL). The reaction mixture was stirred under H<sub>2</sub> (50 atm) at 40 °C for 24 h. Then the resulting crude product was purified by column chromatography on silica gel with (PE:EA = 100:1) to afford the title compound as a yellow oil (35 mg, 44% yield, *Z/E* = 99:1), recovery **12** (32mg, 40%). <sup>1</sup>H NMR (400 MHz, CDCl<sub>3</sub>):  $\delta$  7.44–7.36 (m, 2H), 7.29 (d, *J* = 8.0 Hz, 2H), 7.18–7.09 (m, 4H), 6.40 (d, *J* = 11.6 Hz, 1H), 5.66 (dt, *J* = 11.6, 7.2 Hz, 1H), 2.48–2.33 (m, 4H), 2.20–2.09 (m, 4H), 1.64–1.57 (m, 2H), 1.53–1.43 (m, 4H), 1.41–1.31 (m, 2H), 0.99–0.89 (m, 6H), 0.79–0.71 (m, 6H); <sup>13</sup>C NMR (100 MHz, CDCl<sub>3</sub>):  $\delta$  142.2, 140.8, 139.4, 139.0, 136.0, 133.1, 131.4, 128.8, 128.7, 128.6, 122.0, 90.3, 80.7, 32.4, 31.1, 28.7, 28.6, 28.5, 22.6, 22.2, 19.3, 14.1, 13.8, 13.5, 13.4. HRMS (ESI, *m/z*): calcd for C<sub>30</sub>H<sub>39</sub> [M+H]<sup>+</sup>: 399.3046, found: 399.3047.

#### 10. Supplementary the Single Crystal Data of the Complex of **1a** (CCDC: 2015820)

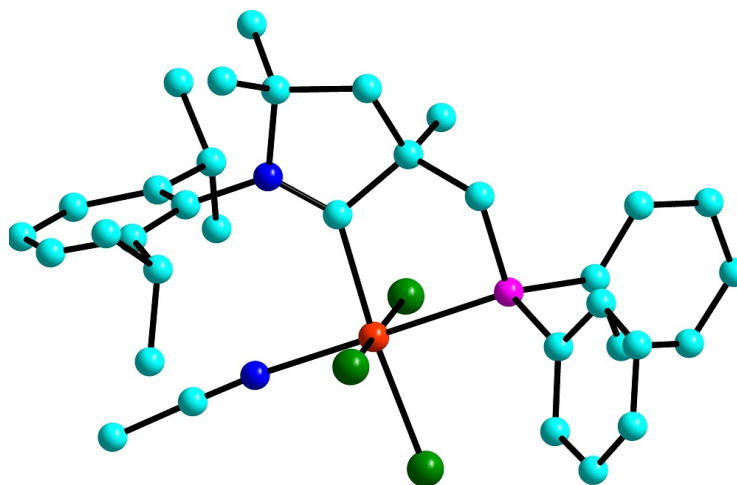

Single crystals of **1a** suitable for X-ray crystallography was obtained by recrystallization from hexane to acetonitrile at –30 °C. The shape of crystals is blue and they stored for a while outside solvent, the solvent molecules in crystals were evaporated resulting in solvent accessible VOID(S) in structures. .

**alert level B**

Author Response: The reflections might be missing because they are shadowed by the beam-stop due to large unit cell dimensions.

**Supplementary Table S9. Crystal Data and Structure Refinement for 1a**

|                                                |                                                                    |
|------------------------------------------------|--------------------------------------------------------------------|
| Identification code                            | 200604_s2_11                                                       |
| Empirical formula                              | C <sub>34</sub> H <sub>43</sub> Cl <sub>3</sub> CrN <sub>2</sub> P |
| Formula weight                                 | 669.02                                                             |
| Temperature/K                                  | 293.15                                                             |
| Crystal system                                 | orthorhombic                                                       |
| Space group                                    | Pbca                                                               |
| a/Å                                            | 14.1900(6)                                                         |
| b/Å                                            | 32.7831(19)                                                        |
| c/Å                                            | 34.2410(10)                                                        |
| $\alpha/^\circ$                                | 90                                                                 |
| $\beta/^\circ$                                 | 90                                                                 |
| $\gamma/^\circ$                                | 90                                                                 |
| Volume/Å <sup>3</sup>                          | 15928.6(12)                                                        |
| Z                                              | 16                                                                 |
| $\rho_{\text{calc}}/\text{cm}^3$               | 1.116                                                              |
| $\mu/\text{mm}^{-1}$                           | 0.551                                                              |
| F(000)                                         | 5616.0                                                             |
| Crystal size/mm <sup>3</sup>                   | 0.35 × 0.3 × 0.05                                                  |
| Radiation                                      | MoK $\alpha$ ( $\lambda$ = 0.71073)                                |
| 2 $\Theta$ range for data collection/ $^\circ$ | 5.862 to 52.746                                                    |
| Index ranges                                   | -17 ≤ h ≤ 16, -27 ≤ k ≤ 40, -42 ≤ l ≤ 41                           |
| Reflections collected                          | 43753                                                              |
| Independent reflections                        | 16201 [ $R_{\text{int}}$ = 0.0327, $R_{\text{sigma}}$ = 0.0505]    |
| Data/restraints/parameters                     | 16201/2/755                                                        |
| Goodness-of-fit on F <sup>2</sup>              | 1.049                                                              |
| Final R indexes [ $I \geq 2\sigma(I)$ ]        | $R_1$ = 0.0807, $wR_2$ = 0.2391                                    |
| Final R indexes [all data]                     | $R_1$ = 0.1303, $wR_2$ = 0.2818                                    |
| Largest diff. peak/hole / e Å <sup>-3</sup>    | 1.15/-0.55                                                         |



**Supplementary Table S10. Fractional Atomic Coordinates ( $\times 10^4$ ) and Equivalent Isotropic Displacement Parameters ( $\text{\AA}^2 \times 10^3$ ) for Complex 1a.  $U_{\text{eq}}$  is defined as 1/3 of the trace of the orthogonalised  $U_{ij}$  tensor.**

| Atom | $x$        | $y$        | $z$        | $U(\text{eq})$ |
|------|------------|------------|------------|----------------|
| Cr1  | 1797.4(5)  | 5215.9(3)  | 3265.3(2)  | 50.9(2)        |
| Cl1  | 2827.1(10) | 5780.8(6)  | 3283.2(4)  | 76.6(5)        |
| Cl2  | 555.4(9)   | 5587.0(4)  | 3514.3(3)  | 60.3(3)        |
| Cl3  | 2941.7(11) | 4834.1(6)  | 2960.2(4)  | 80.1(5)        |
| P1   | 1131.2(9)  | 5439.7(5)  | 2639.3(3)  | 51.4(3)        |
| N1   | 393(3)     | 4466.2(14) | 3435.4(11) | 56.1(10)       |
| N2   | 2244(3)    | 5045.0(15) | 3823.5(11) | 59.0(11)       |
| C1   | 778(3)     | 4734.1(15) | 3204.6(13) | 48.4(11)       |
| C2   | 298(4)     | 4693.7(17) | 2800.7(14) | 59.0(13)       |
| C3   | -609(4)    | 4461(2)    | 2883.0(16) | 74.6(17)       |
| C4   | -443(4)    | 4223.9(19) | 3259.1(16) | 69.1(15)       |
| C5   | 108(3)     | 5109.2(17) | 2609.9(14) | 58.7(13)       |
| C6   | 949(5)     | 4438(2)    | 2533.3(17) | 80.1(18)       |
| C7   | -1303(5)   | 4245(2)    | 3521.8(19) | 90(2)          |
| C8   | -145(6)    | 3773(2)    | 3190(2)    | 95(2)          |
| C9   | 709(4)     | 4353.7(18) | 3825.2(14) | 61.2(14)       |
| C10  | 243(4)     | 4503.3(17) | 4159.3(14) | 58.4(13)       |
| C11  | 494(5)     | 4338(2)    | 4518.2(16) | 71.9(16)       |
| C12  | 1174(5)    | 4042(2)    | 4558.2(18) | 82.1(19)       |
| C13  | 1633(5)    | 3910(2)    | 4240.4(19) | 80.3(18)       |
| C14  | 1427(5)    | 4058.3(19) | 3860.4(18) | 71.6(15)       |
| C15  | -417(4)    | 4863.8(18) | 4166.2(15) | 65.0(14)       |
| C16  | 6(5)       | 5223(2)    | 4385.3(16) | 80.9(18)       |
| C17  | -1363(5)   | 4770(2)    | 4365.2(19) | 90(2)          |
| C18  | 2060(6)    | 3900(2)    | 3528.7(19) | 90(2)          |
| C19  | 3076(5)    | 4030(3)    | 3591(2)    | 113(3)         |
| C20  | 2001(8)    | 3435(3)    | 3488(3)    | 144(4)         |
| C21  | 606(3)     | 5945.0(18) | 2591.2(13) | 55.7(13)       |
| C22  | 988(5)     | 6285(2)    | 2775.4(17) | 77.0(17)       |
| C23  | 575(6)     | 6659(2)    | 2732(2)    | 88(2)          |
| C24  | -236(5)    | 6701(2)    | 2519.5(18) | 81.3(18)       |
| C25  | -607(4)    | 6379(2)    | 2338.1(18) | 75.6(17)       |
| C26  | -205(4)    | 5997(2)    | 2366.5(15) | 64.6(15)       |
| C27  | 1834(3)    | 5414.3(18) | 2198.0(13) | 54.9(13)       |
| C28  | 2659(4)    | 5639.4(19) | 2188.9(14) | 64.5(15)       |

|     |            |            |            |          |
|-----|------------|------------|------------|----------|
| C29 | 3203(4)    | 5660(2)    | 1859.6(16) | 74.9(18) |
| C30 | 2935(4)    | 5459(2)    | 1525.7(16) | 78.7(19) |
| C31 | 2122(5)    | 5223(2)    | 1525.8(16) | 81.8(19) |
| C32 | 1572(4)    | 5198(2)    | 1862.4(14) | 68.1(15) |
| C33 | 2496(4)    | 4982.5(17) | 4128.7(14) | 58.2(13) |
| C34 | 2840(4)    | 4906(2)    | 4524.7(15) | 77.1(18) |
| Cr2 | 6186.7(6)  | 6456.2(2)  | 4672.4(2)  | 48.9(2)  |
| Cl4 | 5925.4(12) | 6180.9(6)  | 5296.9(4)  | 85.5(5)  |
| Cl5 | 5005.4(11) | 6936.8(5)  | 4732.1(5)  | 74.3(4)  |
| Cl6 | 7287.6(10) | 5968.2(5)  | 4521.5(5)  | 78.0(4)  |
| P2  | 4922.0(9)  | 6060.1(4)  | 4364.8(3)  | 50.0(3)  |
| N3  | 6759(3)    | 7022.6(13) | 3950.6(11) | 57.0(11) |
| N4  | 7198(4)    | 6818.2(16) | 4922.9(13) | 64.3(13) |
| C35 | 6317(3)    | 6713.5(15) | 4100.2(12) | 46.9(11) |
| C36 | 5726(4)    | 6520.2(17) | 3778.0(13) | 60.0(14) |
| C37 | 5677(5)    | 6838(2)    | 3462.5(17) | 85(2)    |
| C38 | 6503(5)    | 7120(2)    | 3520.9(16) | 81.8(19) |
| C39 | 4803(4)    | 6349.7(19) | 3913.3(16) | 72.2(16) |
| C40 | 6312(5)    | 6150(2)    | 3622.8(18) | 80.4(18) |
| C41 | 6218(6)    | 7560(2)    | 3465(2)    | 114(3)   |
| C42 | 7347(6)    | 7036(3)    | 3261.3(18) | 111(3)   |
| C43 | 7488(4)    | 7277.2(17) | 4137.2(13) | 59.9(13) |
| C44 | 7250(5)    | 7645.0(18) | 4307.3(16) | 69.9(15) |
| C45 | 7997(6)    | 7890(2)    | 4433(2)    | 91(2)    |
| C46 | 8915(6)    | 7780(3)    | 4391(2)    | 107(3)   |
| C47 | 9136(5)    | 7400(2)    | 4238(2)    | 88(2)    |
| C48 | 8435(4)    | 7143.0(19) | 4115.5(16) | 68.2(15) |
| C49 | 6279(5)    | 7803(2)    | 4395.4(19) | 85.4(19) |
| C50 | 6126(6)    | 7838(2)    | 4846(2)    | 114(3)   |
| C51 | 6068(6)    | 8224(2)    | 4212(3)    | 114(3)   |
| C52 | 8778(4)    | 6727(2)    | 3990.2(19) | 80.3(18) |
| C53 | 9286(5)    | 6503(2)    | 4328(2)    | 102(2)   |
| C54 | 9452(6)    | 6746(3)    | 3639(3)    | 123(3)   |
| C55 | 3720(4)    | 6064.9(16) | 4557.6(16) | 58.7(13) |
| C56 | 3571(4)    | 6065.1(17) | 4953.8(16) | 65.7(14) |
| C57 | 2654(5)    | 6048.3(19) | 5096(2)    | 80.6(18) |
| C58 | 1911(5)    | 6036(2)    | 4842(3)    | 87(2)    |
| C59 | 2062(5)    | 6028(2)    | 4459(2)    | 86(2)    |
| C60 | 2954(4)    | 6043(2)    | 4308.2(19) | 73.8(16) |

|     |          |            |            |          |
|-----|----------|------------|------------|----------|
| C61 | 5076(4)  | 5518.6(16) | 4265.4(14) | 54.7(12) |
| C62 | 5521(4)  | 5282.1(18) | 4540.0(17) | 67.8(14) |
| C63 | 5614(5)  | 4867.4(19) | 4482(2)    | 85.2(19) |
| C64 | 5244(5)  | 4692(2)    | 4151(2)    | 87(2)    |
| C65 | 4814(5)  | 4919(2)    | 3873(2)    | 76.1(17) |
| C66 | 4719(4)  | 5334.7(18) | 3925.9(16) | 63.6(14) |
| C67 | 7667(8)  | 6968(4)    | 5106(3)    | 158(4)   |
| C68 | 8385(12) | 7248(6)    | 5373(5)    | 308(13)  |

**Supplementary Table S11. Anisotropic Displacement Parameters ( $\text{\AA}^2 \times 10^3$ ) for Complex 1a.**  
**The Anisotropic displacement factor exponent takes the form:  $-2\pi^2[h^{2a} + k^{2b} + l^{2c} + 2hka + 2hkb + 2kcl]$ .**

| Atom | U <sub>11</sub> | U <sub>22</sub> | U <sub>33</sub> | U <sub>23</sub> | U <sub>13</sub> | U <sub>12</sub> |
|------|-----------------|-----------------|-----------------|-----------------|-----------------|-----------------|
| Cr1  | 47.5(4)         | 73.5(6)         | 31.7(4)         | 5.6(3)          | -2.3(3)         | -6.3(4)         |
| Cl1  | 70.4(8)         | 105.9(13)       | 53.5(7)         | 15.1(7)         | -13.4(6)        | -33.1(8)        |
| Cl2  | 64.8(7)         | 73.8(9)         | 42.3(6)         | 5.9(6)          | 5.1(5)          | 3.2(7)          |
| Cl3  | 70.0(8)         | 115.5(14)       | 54.9(8)         | 7.8(8)          | 10.4(6)         | 19.9(9)         |
| P1   | 50.3(7)         | 70.8(9)         | 33.1(6)         | 5.8(6)          | -3.2(5)         | -8.8(6)         |
| N1   | 66(3)           | 62(3)           | 40(2)           | 8.3(19)         | -1.7(19)        | -9(2)           |
| N2   | 53(2)           | 82(3)           | 43(2)           | 6(2)            | -4.1(18)        | -3(2)           |
| C1   | 50(2)           | 55(3)           | 41(2)           | -5(2)           | -6(2)           | 10(2)           |
| C2   | 72(3)           | 64(3)           | 42(2)           | 0(2)            | -10(2)          | -11(3)          |
| C3   | 85(4)           | 78(4)           | 61(3)           | 14(3)           | -22(3)          | -28(3)          |
| C4   | 79(4)           | 67(4)           | 61(3)           | 9(3)            | -12(3)          | -23(3)          |
| C5   | 53(3)           | 79(4)           | 44(2)           | 7(2)            | -8(2)           | -12(3)          |
| C6   | 106(5)          | 81(4)           | 54(3)           | -10(3)          | -6(3)           | 14(4)           |
| C7   | 85(4)           | 107(6)          | 76(4)           | 22(4)           | -10(3)          | -37(4)          |
| C8   | 133(6)          | 69(4)           | 84(4)           | -1(4)           | -15(4)          | -21(4)          |
| C9   | 68(3)           | 66(3)           | 50(3)           | 14(2)           | -6(2)           | -12(3)          |
| C10  | 62(3)           | 65(3)           | 47(3)           | 12(2)           | 0(2)            | -6(3)           |
| C11  | 88(4)           | 79(4)           | 48(3)           | 12(3)           | 1(3)            | -15(4)          |
| C12  | 102(5)          | 84(5)           | 60(4)           | 26(3)           | -17(3)          | -8(4)           |
| C13  | 97(5)           | 70(4)           | 74(4)           | 23(3)           | -14(4)          | 10(4)           |
| C14  | 81(4)           | 62(4)           | 71(4)           | 5(3)            | -6(3)           | 9(3)            |
| C15  | 72(3)           | 77(4)           | 47(3)           | 16(3)           | 7(2)            | -1(3)           |
| C16  | 109(5)          | 85(5)           | 48(3)           | 4(3)            | 12(3)           | -12(4)          |
| C17  | 87(4)           | 115(6)          | 70(4)           | 20(4)           | 26(3)           | -7(4)           |
| C18  | 120(6)          | 80(5)           | 70(4)           | 5(3)            | -9(4)           | 23(4)           |
| C19  | 88(5)           | 148(8)          | 102(6)          | 30(5)           | 10(4)           | 45(5)           |

|     |          |           |           |          |          |           |
|-----|----------|-----------|-----------|----------|----------|-----------|
| C20 | 208(11)  | 84(6)     | 140(8)    | -18(6)   | -15(7)   | 51(7)     |
| C21 | 55(3)    | 76(4)     | 36(2)     | 10(2)    | 8(2)     | -5(3)     |
| C22 | 82(4)    | 86(5)     | 63(3)     | 1(3)     | -6(3)    | -11(4)    |
| C23 | 126(6)   | 65(4)     | 74(4)     | -3(3)    | 11(4)    | -10(4)    |
| C24 | 106(5)   | 76(4)     | 62(3)     | 9(3)     | 9(4)     | 14(4)     |
| C25 | 70(4)    | 86(5)     | 71(4)     | 23(3)    | 3(3)     | 0(4)      |
| C26 | 55(3)    | 83(4)     | 56(3)     | 16(3)    | 1(2)     | -7(3)     |
| C27 | 52(3)    | 78(4)     | 34(2)     | 7(2)     | -1(2)    | -2(3)     |
| C28 | 58(3)    | 93(4)     | 42(3)     | 12(3)    | -5(2)    | 1(3)      |
| C29 | 53(3)    | 114(5)    | 57(3)     | 14(3)    | 4(3)     | -1(3)     |
| C30 | 69(4)    | 118(6)    | 48(3)     | 9(3)     | 11(3)    | 18(4)     |
| C31 | 93(4)    | 112(6)    | 40(3)     | -11(3)   | -1(3)    | 13(4)     |
| C32 | 70(3)    | 90(4)     | 44(3)     | 1(3)     | 0(2)     | -6(3)     |
| C33 | 56(3)    | 73(4)     | 46(3)     | 5(2)     | 0(2)     | -3(3)     |
| C34 | 87(4)    | 100(5)    | 44(3)     | 18(3)    | -14(3)   | -7(4)     |
| Cr2 | 60.9(5)  | 49.1(5)   | 36.7(4)   | 1.4(3)   | -5.8(3)  | -2.7(4)   |
| Cl4 | 97.1(11) | 110.1(13) | 49.4(7)   | 26.8(8)  | -14.5(7) | -24.3(10) |
| Cl5 | 82.3(9)  | 58.6(8)   | 81.9(10)  | -11.4(7) | 16.4(8)  | 5.7(7)    |
| Cl6 | 63.5(8)  | 64.2(9)   | 106.3(12) | -3.7(8)  | -9.7(8)  | 6.5(7)    |
| P2  | 58.7(7)  | 48.7(7)   | 42.7(6)   | 2.6(5)   | -5.6(5)  | -2.1(6)   |
| N3  | 77(3)    | 55(3)     | 39(2)     | 4.3(18)  | -6.5(19) | -11(2)    |
| N4  | 77(3)    | 64(3)     | 52(3)     | -6(2)    | -23(2)   | -23(3)    |
| C35 | 58(3)    | 46(3)     | 37(2)     | -4(2)    | 2(2)     | 3(2)      |
| C36 | 74(3)    | 71(4)     | 35(2)     | -1(2)    | -5(2)    | -15(3)    |
| C37 | 111(5)   | 92(5)     | 54(3)     | 18(3)    | -21(3)   | -34(4)    |
| C38 | 113(5)   | 87(5)     | 46(3)     | 20(3)    | -19(3)   | -33(4)    |
| C39 | 86(4)    | 74(4)     | 57(3)     | 14(3)    | -19(3)   | -8(3)     |
| C40 | 92(4)    | 83(5)     | 66(4)     | -19(3)   | 8(3)     | -3(4)     |
| C41 | 155(7)   | 96(6)     | 92(5)     | 54(4)    | -47(5)   | -28(5)    |
| C42 | 146(7)   | 139(7)    | 49(3)     | 13(4)    | -2(4)    | -50(6)    |
| C43 | 83(4)    | 55(3)     | 41(2)     | 7(2)     | -10(2)   | -13(3)    |
| C44 | 93(4)    | 54(3)     | 62(3)     | 3(3)     | -15(3)   | -13(3)    |
| C45 | 126(6)   | 61(4)     | 86(5)     | -12(3)   | -22(4)   | -10(4)    |
| C46 | 109(6)   | 105(6)    | 105(6)    | -2(5)    | -37(5)   | -40(5)    |
| C47 | 88(4)    | 95(5)     | 81(4)     | -9(4)    | -10(3)   | -20(4)    |
| C48 | 83(4)    | 67(4)     | 54(3)     | -2(3)    | -3(3)    | -19(3)    |
| C49 | 115(5)   | 60(4)     | 82(4)     | 2(3)     | -12(4)   | -1(4)     |
| C50 | 154(8)   | 77(5)     | 111(6)    | -25(4)   | 14(5)    | -1(5)     |
| C51 | 137(7)   | 63(4)     | 144(7)    | 16(5)    | -11(6)   | 6(5)      |

|     |         |         |         |         |          |          |
|-----|---------|---------|---------|---------|----------|----------|
| C52 | 75(4)   | 81(4)   | 84(4)   | -11(4)  | 10(3)    | -19(4)   |
| C53 | 82(5)   | 106(6)  | 118(6)  | 18(5)   | 11(4)    | 2(4)     |
| C54 | 101(6)  | 154(9)  | 114(6)  | -28(6)  | 40(5)    | -29(6)   |
| C55 | 57(3)   | 52(3)   | 68(3)   | 1(3)    | -3(2)    | 6(3)     |
| C56 | 77(3)   | 56(3)   | 64(3)   | 5(3)    | 4(3)     | -2(3)    |
| C57 | 82(4)   | 69(4)   | 91(4)   | 1(3)    | 24(4)    | -7(3)    |
| C58 | 64(4)   | 64(4)   | 134(7)  | -8(4)   | 24(4)    | -5(3)    |
| C59 | 61(4)   | 82(5)   | 115(6)  | -11(4)  | -4(4)    | -5(3)    |
| C60 | 65(4)   | 80(4)   | 76(4)   | -5(3)   | -7(3)    | 5(3)     |
| C61 | 61(3)   | 51(3)   | 52(3)   | -5(2)   | 11(2)    | -10(2)   |
| C62 | 78(4)   | 57(3)   | 68(3)   | 6(3)    | -5(3)    | -6(3)    |
| C63 | 103(5)  | 51(4)   | 101(5)  | 12(3)   | 6(4)     | 1(4)     |
| C64 | 103(5)  | 49(4)   | 109(5)  | -16(4)  | 28(4)    | -11(4)   |
| C65 | 83(4)   | 64(4)   | 80(4)   | -22(3)  | 21(3)    | -17(3)   |
| C66 | 57(3)   | 74(4)   | 60(3)   | -14(3)  | 5(2)     | -10(3)   |
| C67 | 155(10) | 154(11) | 165(11) | 39(9)   | 30(9)    | 9(9)     |
| C68 | 243(17) | 320(20) | 360(30) | 110(20) | -182(18) | -158(18) |

**Supplementary Table S12. Bond Lengths for Complex 1a**

| Atom Atom Length/Å |     |            | Atom Atom Length/Å |     |            |
|--------------------|-----|------------|--------------------|-----|------------|
| Cr1                | Cl1 | 2.3599(17) | Cr2                | Cl4 | 2.3505(15) |
| Cr1                | Cl2 | 2.3051(15) | Cr2                | Cl5 | 2.3095(17) |
| Cr1                | Cl3 | 2.3009(17) | Cr2                | Cl6 | 2.2948(17) |
| Cr1                | P1  | 2.4548(13) | Cr2                | P2  | 2.4528(15) |
| Cr1                | N2  | 2.090(4)   | Cr2                | N4  | 2.050(4)   |
| Cr1                | C1  | 2.152(5)   | Cr2                | C35 | 2.141(4)   |
| P1                 | C5  | 1.815(5)   | P2                 | C39 | 1.822(5)   |
| P1                 | C21 | 1.824(6)   | P2                 | C55 | 1.829(5)   |
| P1                 | C27 | 1.812(5)   | P2                 | C61 | 1.821(5)   |
| N1                 | C1  | 1.302(6)   | N3                 | C35 | 1.297(6)   |
| N1                 | C4  | 1.550(7)   | N3                 | C38 | 1.549(6)   |
| N1                 | C9  | 1.456(6)   | N3                 | C43 | 1.475(7)   |
| N2                 | C33 | 1.123(6)   | N4                 | C67 | 1.040(11)  |
| C1                 | C2  | 1.548(6)   | C35                | C36 | 1.524(6)   |
| C2                 | C3  | 1.523(8)   | C36                | C37 | 1.503(8)   |
| C2                 | C5  | 1.535(7)   | C36                | C39 | 1.498(8)   |
| C2                 | C6  | 1.548(8)   | C36                | C40 | 1.564(8)   |
| C3                 | C4  | 1.522(7)   | C37                | C38 | 1.506(9)   |
| C4                 | C7  | 1.518(9)   | C38                | C41 | 1.509(10)  |

|     |     |           |     |     |           |
|-----|-----|-----------|-----|-----|-----------|
| C4  | C8  | 1.556(9)  | C38 | C42 | 1.517(11) |
| C9  | C10 | 1.410(7)  | C43 | C44 | 1.381(8)  |
| C9  | C14 | 1.411(8)  | C43 | C48 | 1.416(8)  |
| C10 | C11 | 1.390(7)  | C44 | C45 | 1.398(9)  |
| C10 | C15 | 1.508(8)  | C44 | C49 | 1.503(9)  |
| C11 | C12 | 1.375(9)  | C45 | C46 | 1.361(11) |
| C12 | C13 | 1.339(9)  | C46 | C47 | 1.387(11) |
| C13 | C14 | 1.419(8)  | C47 | C48 | 1.369(8)  |
| C14 | C18 | 1.537(9)  | C48 | C52 | 1.511(9)  |
| C15 | C16 | 1.519(8)  | C49 | C50 | 1.561(10) |
| C15 | C17 | 1.537(8)  | C49 | C51 | 1.546(9)  |
| C18 | C19 | 1.519(11) | C52 | C53 | 1.547(10) |
| C18 | C20 | 1.536(11) | C52 | C54 | 1.539(9)  |
| C21 | C22 | 1.391(8)  | C55 | C56 | 1.373(7)  |
| C21 | C26 | 1.395(7)  | C55 | C60 | 1.384(8)  |
| C22 | C23 | 1.367(9)  | C56 | C57 | 1.390(8)  |
| C23 | C24 | 1.367(10) | C57 | C58 | 1.366(10) |
| C24 | C25 | 1.332(9)  | C58 | C59 | 1.330(10) |
| C25 | C26 | 1.380(8)  | C59 | C60 | 1.368(9)  |
| C27 | C28 | 1.384(7)  | C61 | C62 | 1.373(8)  |
| C27 | C32 | 1.400(7)  | C61 | C66 | 1.404(7)  |
| C28 | C29 | 1.368(7)  | C62 | C63 | 1.380(8)  |
| C29 | C30 | 1.373(9)  | C63 | C64 | 1.374(10) |
| C30 | C31 | 1.389(9)  | C64 | C65 | 1.355(10) |
| C31 | C32 | 1.394(8)  | C65 | C66 | 1.381(8)  |
| C33 | C34 | 1.463(7)  | C67 | C68 | 1.646(14) |

**Supplementary Table S13. Bond Angles for Complex 1a.**

| Atom | Atom | Atom | Angle/°    | Atom | Atom | Atom | Angle/°    |
|------|------|------|------------|------|------|------|------------|
| Cl1  | Cr1  | P1   | 91.52(5)   | Cl4  | Cr2  | P2   | 94.13(6)   |
| Cl2  | Cr1  | Cl1  | 92.84(6)   | Cl5  | Cr2  | Cl4  | 93.83(7)   |
| Cl2  | Cr1  | P1   | 82.58(5)   | Cl5  | Cr2  | P2   | 82.42(6)   |
| Cl3  | Cr1  | Cl1  | 90.10(7)   | Cl6  | Cr2  | Cl4  | 92.55(7)   |
| Cl3  | Cr1  | Cl2  | 174.05(6)  | Cl6  | Cr2  | Cl5  | 171.71(7)  |
| Cl3  | Cr1  | P1   | 92.18(5)   | Cl6  | Cr2  | P2   | 91.86(6)   |
| N2   | Cr1  | Cl1  | 89.93(13)  | N4   | Cr2  | Cl4  | 87.25(14)  |
| N2   | Cr1  | Cl2  | 92.01(13)  | N4   | Cr2  | Cl5  | 94.37(17)  |
| N2   | Cr1  | Cl3  | 93.17(13)  | N4   | Cr2  | Cl6  | 91.22(17)  |
| N2   | Cr1  | P1   | 174.46(13) | N4   | Cr2  | P2   | 176.58(16) |

|     |     |     |            |     |     |     |            |
|-----|-----|-----|------------|-----|-----|-----|------------|
| N2  | Cr1 | C1  | 95.48(17)  | N4  | Cr2 | C35 | 95.43(19)  |
| C1  | Cr1 | Cl1 | 174.16(13) | C35 | Cr2 | Cl4 | 175.84(14) |
| C1  | Cr1 | Cl2 | 84.78(13)  | C35 | Cr2 | Cl5 | 82.81(13)  |
| C1  | Cr1 | Cl3 | 91.80(13)  | C35 | Cr2 | Cl6 | 90.58(13)  |
| C1  | Cr1 | P1  | 82.89(12)  | C35 | Cr2 | P2  | 83.03(13)  |
| C5  | P1  | Cr1 | 100.26(16) | C39 | P2  | Cr2 | 99.00(19)  |
| C5  | P1  | C21 | 102.2(3)   | C39 | P2  | C55 | 102.4(3)   |
| C21 | P1  | Cr1 | 120.50(16) | C55 | P2  | Cr2 | 121.53(18) |
| C27 | P1  | Cr1 | 120.17(16) | C61 | P2  | Cr2 | 120.57(18) |
| C27 | P1  | C5  | 111.5(2)   | C61 | P2  | C39 | 111.1(3)   |
| C27 | P1  | C21 | 101.0(2)   | C61 | P2  | C55 | 100.8(2)   |
| C1  | N1  | C4  | 115.5(4)   | C35 | N3  | C38 | 115.0(4)   |
| C1  | N1  | C9  | 126.8(4)   | C35 | N3  | C43 | 127.6(4)   |
| C9  | N1  | C4  | 117.6(4)   | C43 | N3  | C38 | 117.3(4)   |
| C33 | N2  | Cr1 | 174.9(5)   | C67 | N4  | Cr2 | 167.2(8)   |
| N1  | C1  | Cr1 | 135.9(3)   | N3  | C35 | Cr2 | 135.3(3)   |
| N1  | C1  | C2  | 107.5(4)   | N3  | C35 | C36 | 107.8(4)   |
| C2  | C1  | Cr1 | 116.4(3)   | C36 | C35 | Cr2 | 116.8(3)   |
| C1  | C2  | C6  | 108.2(4)   | C35 | C36 | C40 | 106.1(4)   |
| C3  | C2  | C1  | 104.5(4)   | C37 | C36 | C35 | 104.9(4)   |
| C3  | C2  | C5  | 112.0(5)   | C37 | C36 | C40 | 108.6(5)   |
| C3  | C2  | C6  | 110.0(5)   | C39 | C36 | C35 | 114.3(4)   |
| C5  | C2  | C1  | 112.4(4)   | C39 | C36 | C37 | 116.2(5)   |
| C5  | C2  | C6  | 109.5(4)   | C39 | C36 | C40 | 106.3(5)   |
| C4  | C3  | C2  | 106.3(4)   | C36 | C37 | C38 | 107.2(5)   |
| N1  | C4  | C8  | 109.8(5)   | C37 | C38 | N3  | 100.4(4)   |
| C3  | C4  | N1  | 100.8(4)   | C37 | C38 | C41 | 111.2(7)   |
| C3  | C4  | C8  | 113.5(5)   | C37 | C38 | C42 | 115.1(6)   |
| C7  | C4  | N1  | 111.2(5)   | C41 | C38 | N3  | 112.4(5)   |
| C7  | C4  | C3  | 110.7(5)   | C41 | C38 | C42 | 108.1(6)   |
| C7  | C4  | C8  | 110.6(5)   | C42 | C38 | N3  | 109.5(6)   |
| C2  | C5  | P1  | 111.5(3)   | C36 | C39 | P2  | 112.1(4)   |
| C10 | C9  | N1  | 120.7(5)   | C44 | C43 | N3  | 120.3(5)   |
| C10 | C9  | C14 | 120.6(5)   | C44 | C43 | C48 | 121.7(5)   |
| C14 | C9  | N1  | 118.4(5)   | C48 | C43 | N3  | 117.9(5)   |
| C9  | C10 | C15 | 125.2(4)   | C43 | C44 | C45 | 116.5(6)   |
| C11 | C10 | C9  | 117.4(5)   | C43 | C44 | C49 | 127.6(6)   |
| C11 | C10 | C15 | 116.9(5)   | C45 | C44 | C49 | 115.8(6)   |
| C12 | C11 | C10 | 122.9(6)   | C46 | C45 | C44 | 122.7(7)   |

|     |     |     |          |     |     |     |           |
|-----|-----|-----|----------|-----|-----|-----|-----------|
| C13 | C12 | C11 | 119.1(6) | C45 | C46 | C47 | 119.7(7)  |
| C12 | C13 | C14 | 122.4(6) | C48 | C47 | C46 | 120.2(7)  |
| C9  | C14 | C13 | 117.5(6) | C43 | C48 | C52 | 126.9(5)  |
| C9  | C14 | C18 | 126.1(5) | C47 | C48 | C43 | 118.9(6)  |
| C13 | C14 | C18 | 116.3(6) | C47 | C48 | C52 | 114.1(6)  |
| C10 | C15 | C16 | 111.7(5) | C44 | C49 | C50 | 110.5(6)  |
| C10 | C15 | C17 | 113.2(5) | C44 | C49 | C51 | 113.8(6)  |
| C16 | C15 | C17 | 106.3(5) | C51 | C49 | C50 | 108.0(6)  |
| C19 | C18 | C14 | 110.8(6) | C48 | C52 | C53 | 111.5(6)  |
| C19 | C18 | C20 | 110.0(7) | C48 | C52 | C54 | 112.6(6)  |
| C20 | C18 | C14 | 111.8(7) | C54 | C52 | C53 | 108.3(6)  |
| C22 | C21 | P1  | 121.9(4) | C56 | C55 | P2  | 120.0(4)  |
| C22 | C21 | C26 | 118.2(6) | C56 | C55 | C60 | 119.2(5)  |
| C26 | C21 | P1  | 119.9(5) | C60 | C55 | P2  | 120.6(4)  |
| C23 | C22 | C21 | 120.2(6) | C55 | C56 | C57 | 119.3(6)  |
| C22 | C23 | C24 | 120.6(7) | C58 | C57 | C56 | 120.1(6)  |
| C25 | C24 | C23 | 120.1(7) | C59 | C58 | C57 | 120.2(6)  |
| C24 | C25 | C26 | 121.5(6) | C58 | C59 | C60 | 121.4(7)  |
| C25 | C26 | C21 | 119.4(6) | C59 | C60 | C55 | 119.7(6)  |
| C28 | C27 | P1  | 117.4(4) | C62 | C61 | P2  | 118.5(4)  |
| C28 | C27 | C32 | 118.4(5) | C62 | C61 | C66 | 119.4(5)  |
| C32 | C27 | P1  | 124.2(4) | C66 | C61 | P2  | 122.0(4)  |
| C29 | C28 | C27 | 121.4(5) | C61 | C62 | C63 | 120.1(6)  |
| C28 | C29 | C30 | 120.4(6) | C64 | C63 | C62 | 119.7(7)  |
| C29 | C30 | C31 | 119.8(5) | C65 | C64 | C63 | 121.4(6)  |
| C30 | C31 | C32 | 119.8(6) | C64 | C65 | C66 | 119.6(6)  |
| C31 | C32 | C27 | 120.1(6) | C65 | C66 | C61 | 119.9(6)  |
| N2  | C33 | C34 | 178.9(7) | N4  | C67 | C68 | 174.2(13) |

**Supplementary Table S14. Torsion Angles for Complex 1a.**

| A   | B  | C   | D   | Angle/°   | A   | B   | C   | D   | Angle/°   |
|-----|----|-----|-----|-----------|-----|-----|-----|-----|-----------|
| Cr1 | P1 | C5  | C2  | -32.8(4)  | Cr2 | P2  | C39 | C36 | 33.5(5)   |
| Cr1 | P1 | C21 | C22 | 38.3(5)   | Cr2 | P2  | C55 | C56 | -39.0(5)  |
| Cr1 | P1 | C21 | C26 | -141.3(3) | Cr2 | P2  | C55 | C60 | 145.0(4)  |
| Cr1 | P1 | C27 | C28 | -60.5(5)  | Cr2 | P2  | C61 | C62 | 40.5(5)   |
| Cr1 | P1 | C27 | C32 | 122.6(4)  | Cr2 | P2  | C61 | C66 | -142.2(4) |
| Cr1 | C1 | C2  | C3  | -158.6(4) | Cr2 | C35 | C36 | C37 | 160.1(4)  |
| Cr1 | C1 | C2  | C5  | -36.9(5)  | Cr2 | C35 | C36 | C39 | 31.7(6)   |
| Cr1 | C1 | C2  | C6  | 84.2(5)   | Cr2 | C35 | C36 | C40 | -85.1(5)  |



|                          |                           |
|--------------------------|---------------------------|
| P1 C21 C22 C23 179.9(5)  | P2 C55 C56 C57 -176.8(5)  |
| P1 C21 C26 C25 178.7(4)  | P2 C55 C60 C59 177.0(5)   |
| P1 C27 C28 C29 -175.8(5) | P2 C61 C62 C63 177.2(5)   |
| P1 C27 C32 C31 174.9(5)  | P2 C61 C66 C65 -176.8(4)  |
| N1 C1 C2 C3 17.7(6)      | N3 C35 C36 C37 -16.6(6)   |
| N1 C1 C2 C5 139.4(5)     | N3 C35 C36 C39 -145.0(5)  |
| N1 C1 C2 C6 -99.5(5)     | N3 C35 C36 C40 98.2(5)    |
| N1 C9 C10 C11 170.9(5)   | N3 C43 C44 C45 -172.1(5)  |
| N1 C9 C10 C15 -17.2(8)   | N3 C43 C44 C49 11.8(9)    |
| N1 C9 C14 C13 -171.2(5)  | N3 C43 C48 C47 171.0(5)   |
| N1 C9 C14 C18 13.1(9)    | N3 C43 C48 C52 -12.8(8)   |
| C1 N1 C4 C3 -10.0(6)     | C35 N3 C38 C37 8.8(7)     |
| C1 N1 C4 C7 -127.4(5)    | C35 N3 C38 C41 127.1(6)   |
| C1 N1 C4 C8 109.9(5)     | C35 N3 C38 C42 -112.7(6)  |
| C1 N1 C9 C10 102.5(6)    | C35 N3 C43 C44 -97.5(7)   |
| C1 N1 C9 C14 -84.1(7)    | C35 N3 C43 C48 86.0(7)    |
| C1 C2 C3 C4 -23.7(6)     | C35 C36 C37 C38 22.1(7)   |
| C1 C2 C5 P1 46.4(5)      | C35 C36 C39 P2 -44.4(6)   |
| C2 C3 C4 N1 20.3(6)      | C36 C37 C38 N3 -18.6(7)   |
| C2 C3 C4 C7 138.0(5)     | C36 C37 C38 C41 -137.7(6) |
| C2 C3 C4 C8 -97.0(6)     | C36 C37 C38 C42 98.9(7)   |
| C3 C2 C5 P1 163.7(4)     | C37 C36 C39 P2 -166.8(4)  |
| C4 N1 C1 Cr1 170.4(4)    | C38 N3 C35 Cr2 -171.1(4)  |
| C4 N1 C1 C2 -4.7(6)      | C38 N3 C35 C36 4.8(6)     |
| C4 N1 C9 C10 -82.3(6)    | C38 N3 C43 C44 84.8(6)    |
| C4 N1 C9 C14 91.1(6)     | C38 N3 C43 C48 -91.6(6)   |
| C5 P1 C21 C22 148.0(4)   | C39 P2 C55 C56 -147.9(5)  |
| C5 P1 C21 C26 -31.5(4)   | C39 P2 C55 C60 36.1(5)    |
| C5 P1 C27 C28 -177.3(4)  | C39 P2 C61 C62 155.6(4)   |
| C5 P1 C27 C32 5.8(6)     | C39 P2 C61 C66 -27.2(5)   |
| C5 C2 C3 C4 -145.7(5)    | C39 C36 C37 C38 149.4(6)  |
| C6 C2 C3 C4 92.2(6)      | C40 C36 C37 C38 -90.9(6)  |
| C6 C2 C5 P1 -73.9(5)     | C40 C36 C39 P2 72.3(5)    |
| C9 N1 C1 Cr1 -14.3(8)    | C43 N3 C35 Cr2 11.2(9)    |
| C9 N1 C1 C2 170.6(5)     | C43 N3 C35 C36 -173.0(5)  |
| C9 N1 C4 C3 174.2(5)     | C43 N3 C38 C37 -173.2(5)  |
| C9 N1 C4 C7 56.9(7)      | C43 N3 C38 C41 -54.9(8)   |
| C9 N1 C4 C8 -65.8(6)     | C43 N3 C38 C42 65.3(7)    |
| C9 C10 C11 C12 0.7(9)    | C43 C44 C45 C46 0.2(10)   |

|                           |                           |
|---------------------------|---------------------------|
| C9 C10 C15 C16 -111.0(6)  | C43 C44 C49 C50 113.9(7)  |
| C9 C10 C15 C17 129.1(6)   | C43 C44 C49 C51 -124.3(7) |
| C9 C14 C18 C19 113.1(7)   | C43 C48 C52 C53 -116.4(6) |
| C9 C14 C18 C20 -123.7(8)  | C43 C48 C52 C54 121.7(7)  |
| C10 C9 C14 C13 2.2(9)     | C44 C43 C48 C47 -5.4(8)   |
| C10 C9 C14 C18 -173.5(6)  | C44 C43 C48 C52 170.8(6)  |
| C10 C11 C12 C13 1.2(10)   | C44 C45 C46 C47 -3.5(12)  |
| C11 C10 C15 C16 61.0(6)   | C45 C44 C49 C50 -62.2(8)  |
| C11 C10 C15 C17 -58.9(7)  | C45 C44 C49 C51 59.5(8)   |
| C11 C12 C13 C14 -1.5(10)  | C45 C46 C47 C48 2.3(11)   |
| C12 C13 C14 C9 -0.2(10)   | C46 C47 C48 C43 2.0(10)   |
| C12 C13 C14 C18 175.9(7)  | C46 C47 C48 C52 -174.7(6) |
| C13 C14 C18 C19 -62.6(8)  | C47 C48 C52 C53 60.0(7)   |
| C13 C14 C18 C20 60.6(9)   | C47 C48 C52 C54 -61.9(8)  |
| C14 C9 C10 C11 -2.4(8)    | C48 C43 C44 C45 4.3(8)    |
| C14 C9 C10 C15 169.5(5)   | C48 C43 C44 C49 -171.9(5) |
| C15 C10 C11 C12 -171.9(6) | C49 C44 C45 C46 176.8(7)  |
| C21 P1 C5 C2 -157.3(4)    | C55 P2 C39 C36 158.7(4)   |
| C21 P1 C27 C28 74.8(5)    | C55 P2 C61 C62 -96.5(5)   |
| C21 P1 C27 C32 -102.1(5)  | C55 P2 C61 C66 80.8(4)    |
| C21 C22 C23 C24 2.4(10)   | C55 C56 C57 C58 -0.7(9)   |
| C22 C21 C26 C25 -0.8(7)   | C56 C55 C60 C59 0.9(9)    |
| C22 C23 C24 C25 -3.0(10)  | C56 C57 C58 C59 2.1(10)   |
| C23 C24 C25 C26 1.7(10)   | C57 C58 C59 C60 -1.9(11)  |
| C24 C25 C26 C21 0.3(9)    | C58 C59 C60 C55 0.4(11)   |
| C26 C21 C22 C23 -0.5(8)   | C60 C55 C56 C57 -0.8(9)   |
| C27 P1 C5 C2 95.5(4)      | C61 P2 C39 C36 -94.3(5)   |
| C27 P1 C21 C22 -96.9(4)   | C61 P2 C55 C56 97.4(5)    |
| C27 P1 C21 C26 83.6(4)    | C61 P2 C55 C60 -78.6(5)   |
| C27 C28 C29 C30 0.7(10)   | C61 C62 C63 C64 -1.2(10)  |
| C28 C27 C32 C31 -2.0(9)   | C62 C61 C66 C65 0.4(8)    |
| C28 C29 C30 C31 -2.1(10)  | C62 C63 C64 C65 2.2(11)   |
| C29 C30 C31 C32 1.3(10)   | C63 C64 C65 C66 -1.9(10)  |
| C30 C31 C32 C27 0.7(10)   | C64 C65 C66 C61 0.6(9)    |
| C32 C27 C28 C29 1.3(9)    | C66 C61 C62 C63 -0.1(9)   |

**Supplementary Table S15. Hydrogen Atom Coordinates ( $\text{\AA}\times 10^4$ ) and Isotropic Displacement Parameters ( $\text{\AA}^2\times 10^3$ ) for Complex 1a.**

| <b>Atom x</b> | <b>y</b> | <b>z</b> | <b>U(eq)</b> |
|---------------|----------|----------|--------------|
| H3A -1133     | 4648     | 2914     | 90           |
| H3B -751      | 4276     | 2670     | 90           |
| H5A -421      | 5239     | 2739     | 70           |
| H5B -60       | 5069     | 2338     | 70           |
| H6A 1499      | 4594     | 2468     | 120          |
| H6B 617       | 4367     | 2299     | 120          |
| H6C 1135      | 4193     | 2667     | 120          |
| H7A -1163     | 4118     | 3768     | 134          |
| H7B -1819     | 4105     | 3400     | 134          |
| H7C -1472     | 4525     | 3564     | 134          |
| H8A 412       | 3766     | 3031     | 143          |
| H8B -645      | 3630     | 3060     | 143          |
| H8C -19       | 3645     | 3437     | 143          |
| H11 188       | 4431     | 4741     | 86           |
| H12 1315      | 3935     | 4803     | 99           |
| H13 2102      | 3715     | 4270     | 96           |
| H15 -541      | 4948     | 3896     | 78           |
| H16A -415     | 5451     | 4371     | 121          |
| H16B 600      | 5295     | 4270     | 121          |
| H16C 102      | 5149     | 4654     | 121          |
| H17A -1661    | 4545     | 4236     | 136          |
| H17B -1764    | 5006     | 4350     | 136          |
| H17C -1256    | 4702     | 4634     | 136          |
| H18 1840      | 4022     | 3284     | 108          |
| H19A 3115     | 4322     | 3589     | 169          |
| H19B 3462     | 3921     | 3386     | 169          |
| H19C 3293     | 3929     | 3839     | 169          |
| H20A 2116     | 3310     | 3737     | 216          |
| H20B 2466     | 3343     | 3304     | 216          |
| H20C 1385     | 3360     | 3397     | 216          |
| H22 1526      | 6258     | 2928     | 92           |
| H23 847       | 6887     | 2848     | 106          |
| H24 -528      | 6954     | 2502     | 98           |
| H25 -1149     | 6413     | 2189     | 91           |
| H26 -472      | 5776     | 2237     | 78           |
| H28 2847      | 5780     | 2412     | 77           |

|            |      |      |     |
|------------|------|------|-----|
| H29 3758   | 5810 | 1862 | 90  |
| H30 3296   | 5480 | 1300 | 94  |
| H31 1945   | 5082 | 1302 | 98  |
| H32 1032   | 5038 | 1864 | 82  |
| H34A 3059  | 4630 | 4544 | 116 |
| H34B 2337  | 4949 | 4708 | 116 |
| H34C 3348  | 5090 | 4582 | 116 |
| H37A 5090  | 6989 | 3481 | 103 |
| H37B 5710  | 6711 | 3207 | 103 |
| H39A 4547  | 6174 | 3712 | 87  |
| H39B 4362  | 6572 | 3954 | 87  |
| H40A 6912  | 6245 | 3530 | 121 |
| H40B 5977  | 6021 | 3413 | 121 |
| H40C 6406  | 5957 | 3830 | 121 |
| H41A 5672  | 7618 | 3621 | 172 |
| H41B 6076  | 7608 | 3195 | 172 |
| H41C 6727  | 7735 | 3544 | 172 |
| H42a 7887  | 7178 | 3361 | 167 |
| H42B 7215  | 7129 | 3001 | 167 |
| H42C 7472  | 6748 | 3257 | 167 |
| H45 7860   | 8140 | 4549 | 109 |
| H46 9393   | 7958 | 4465 | 128 |
| H47 9763   | 7319 | 4218 | 105 |
| H49 5820   | 7607 | 4293 | 102 |
| H50A 6193  | 7574 | 4963 | 171 |
| H50B 5506  | 7942 | 4897 | 171 |
| H50C 6587  | 8021 | 4954 | 171 |
| H51A 6328  | 8435 | 4373 | 172 |
| H51B 5399  | 8261 | 4191 | 172 |
| H51C 6347  | 8238 | 3956 | 172 |
| H52 8228   | 6564 | 3914 | 96  |
| H53A 9891  | 6626 | 4371 | 153 |
| H53B 9367  | 6221 | 4260 | 153 |
| H53C 8915  | 6523 | 4561 | 153 |
| H54A 9157  | 6893 | 3429 | 185 |
| H54B 9599  | 6475 | 3554 | 185 |
| H54C 10022 | 6884 | 3714 | 185 |
| H56 4078   | 6076 | 5125 | 79  |
| H57 2546   | 6045 | 5364 | 97  |

|      |      |      |      |     |
|------|------|------|------|-----|
| H58  | 1298 | 6034 | 4938 | 105 |
| H59  | 1550 | 6011 | 4290 | 103 |
| H60  | 3045 | 6039 | 4039 | 89  |
| H62  | 5761 | 5401 | 4766 | 81  |
| H63  | 5925 | 4708 | 4665 | 102 |
| H64  | 5290 | 4411 | 4118 | 105 |
| H65  | 4584 | 4796 | 3647 | 91  |
| H66  | 4420 | 5492 | 3737 | 76  |
| H68A | 8636 | 7465 | 5216 | 462 |
| H68B | 8892 | 7081 | 5467 | 462 |
| H68C | 8046 | 7361 | 5590 | 462 |

## 11. Supplementary DFT Computational Study

Geometry optimizations were carried out with the Gaussian 16 package with the B3LYP functional augmented with the D3BJ version of Grimme's empirical dispersion correction.<sup>37-42</sup> The def2-SVP basis set was used for all the atoms. Frequency calculations at the same level of theory were performed to identify the number of imaginary frequencies (zero for local minimum and one for transition states) and provide the thermal corrections of Gibbs free energy. Optimized structures are visualized by the CYL-View program.<sup>43</sup> The reduced forms of the pre-catalysts (coordinated with two THF molecules) was used for geometry optimizations.<sup>2</sup> And two THF molecules were omitted when carrying out the topological steric analysis.

The topological steric maps are generated using the web based SambVca 2.1 program developed by Cavallo *et al.* in 2016.<sup>44</sup> Cr was selected as the center of the sphere. Cr-C bond was selected for *z* axis definition, Cr-N/P bond was selected for *xz*-plane definition. Bondi radii scaled by 1.17 was used as atomic radii, and the Sphere radius was 3.5. The distance of the coordination point from the center of the sphere was 0. The mesh spacing for numerical integration was 0.10. All the H-atoms were included in the calculations.

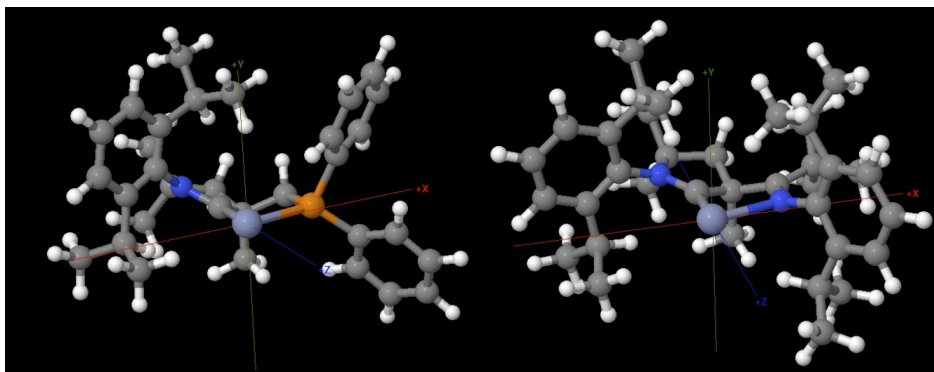

Supplementary Figure S18. Orientation of the steric map of CAAC-Cr(0) from complexes 1a and 1b.

*Steric map of CAAC-phosphino-Cr(0) from 1a*

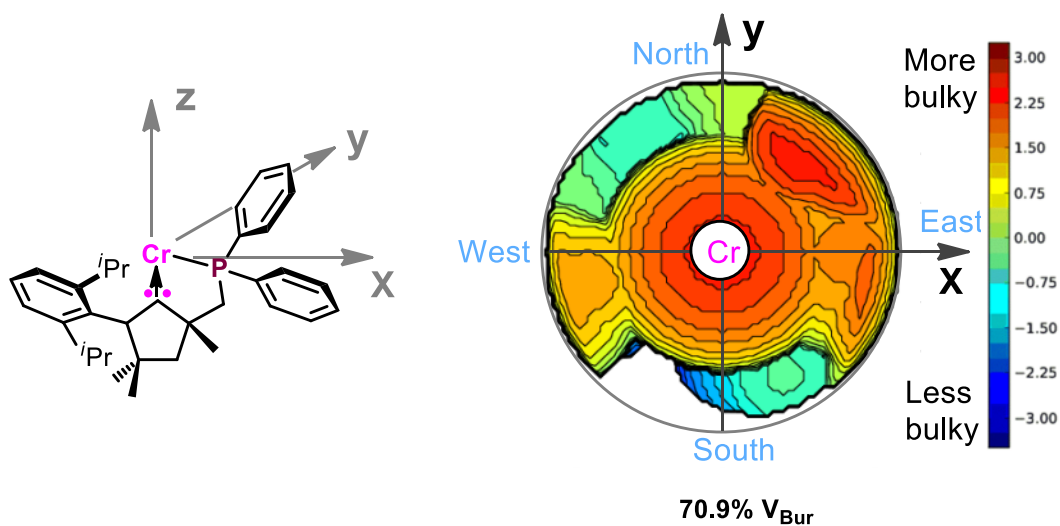

Supplementary Figure S19. Steric map of CAAC-phosphino-Cr(0) from complex 1a. The related complex is oriented according to the scheme on the left; steric map is reported on the right.

Steric map of CAAC-imino-Cr(0) from **1b**

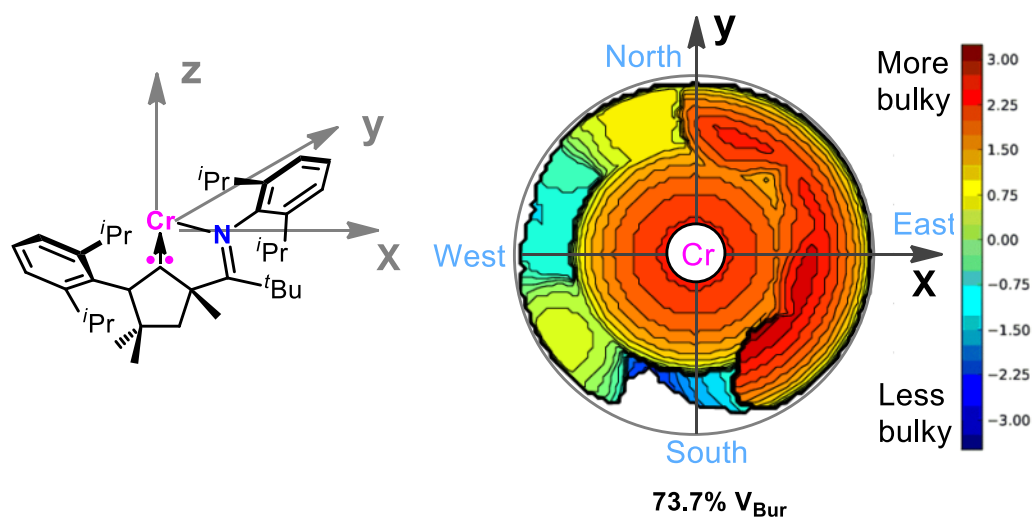

**Supplementary Figure S20.** Steric map of CAAC-imino-Cr(0) from complex **1b**.

The related complex is oriented according to the scheme on the left; steric map is reported on the right.

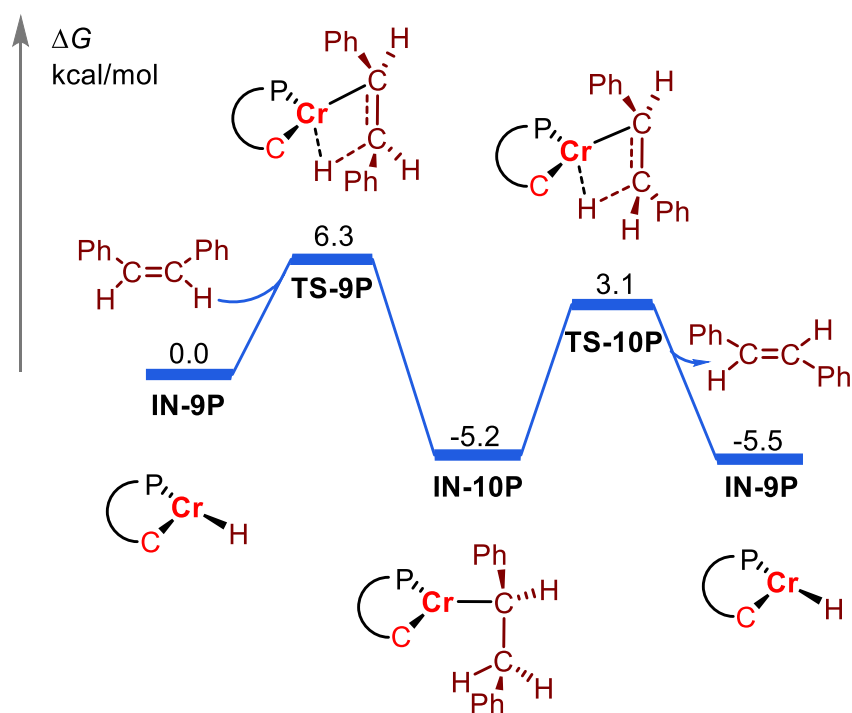

**Supplementary Figure S21.** DFT Calculations for *cis-to-trans* Stereoisomerization with Complex **1a**.

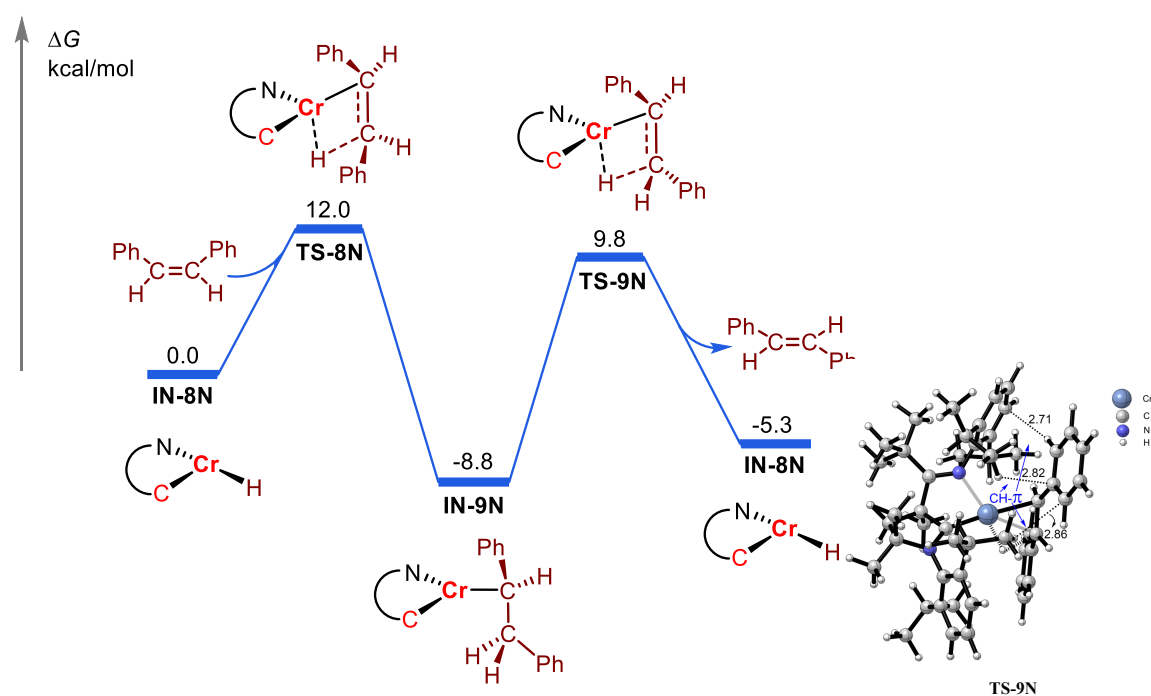

**Supplementary Figure S22. DFT Calculations for *cis*-to-*trans* Stereoisomerization with Complex 1b.**

**Supplementary Table S16. The related parameters for the distance of Cr-C<sub>olefin</sub> bonds and charge population on the chromated C<sub>olefin</sub> in the related intermediates and transition states.**

| Species | Cr-C <sub>olefin</sub> distance (Å) | Charge on chromated C <sub>olefin</sub> |
|---------|-------------------------------------|-----------------------------------------|
| TS-9P   | 2.213                               | -0.1589                                 |
| IN-10P  | 2.139                               | -0.2794                                 |
| TS-10P  | 2.164                               | -0.1312                                 |
| TS-8N   | 2.225                               | -0.1376                                 |
| IN-9N   | 2.176                               | -0.1756                                 |
| TS-9N   | 2.273                               | -0.0942                                 |



## 12. Supplementary $^1\text{H}$ NMR, $^{13}\text{C}$ NMR and $^{19}\text{F}$ NMR Spectra

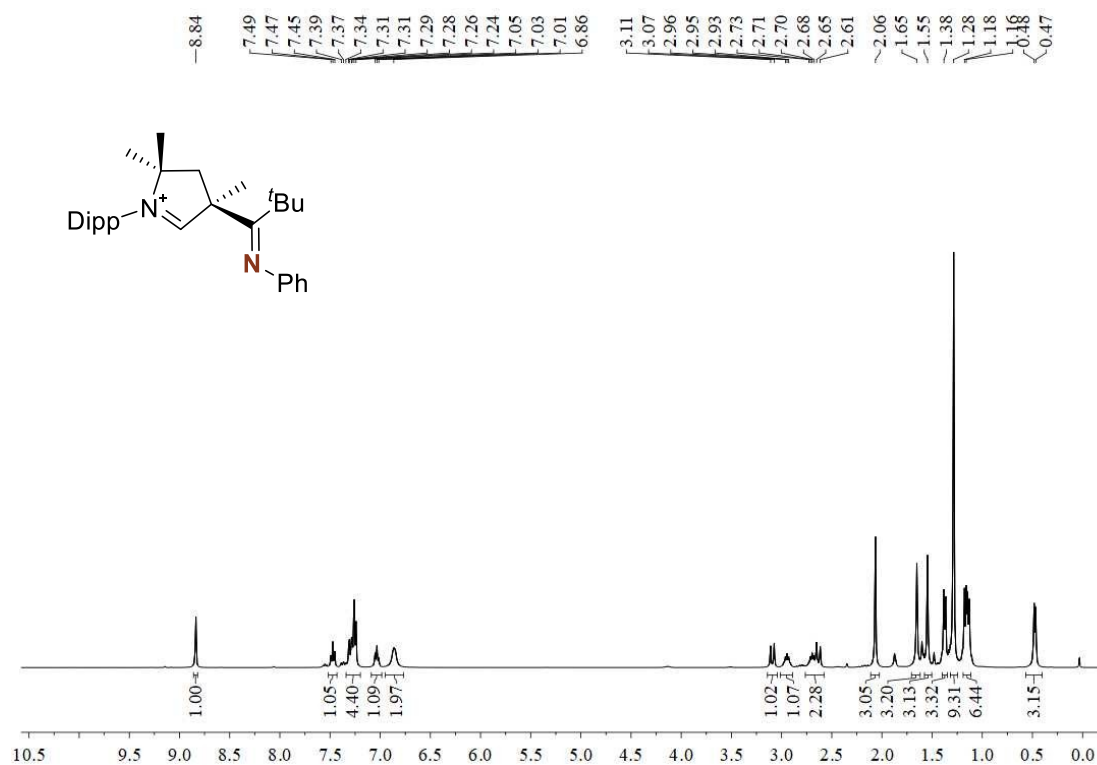

Supplementary Figure S23.  $^1\text{H}$  NMR spectrum for 16 (400 MHz,  $\text{CDCl}_3$ , 25 °C).

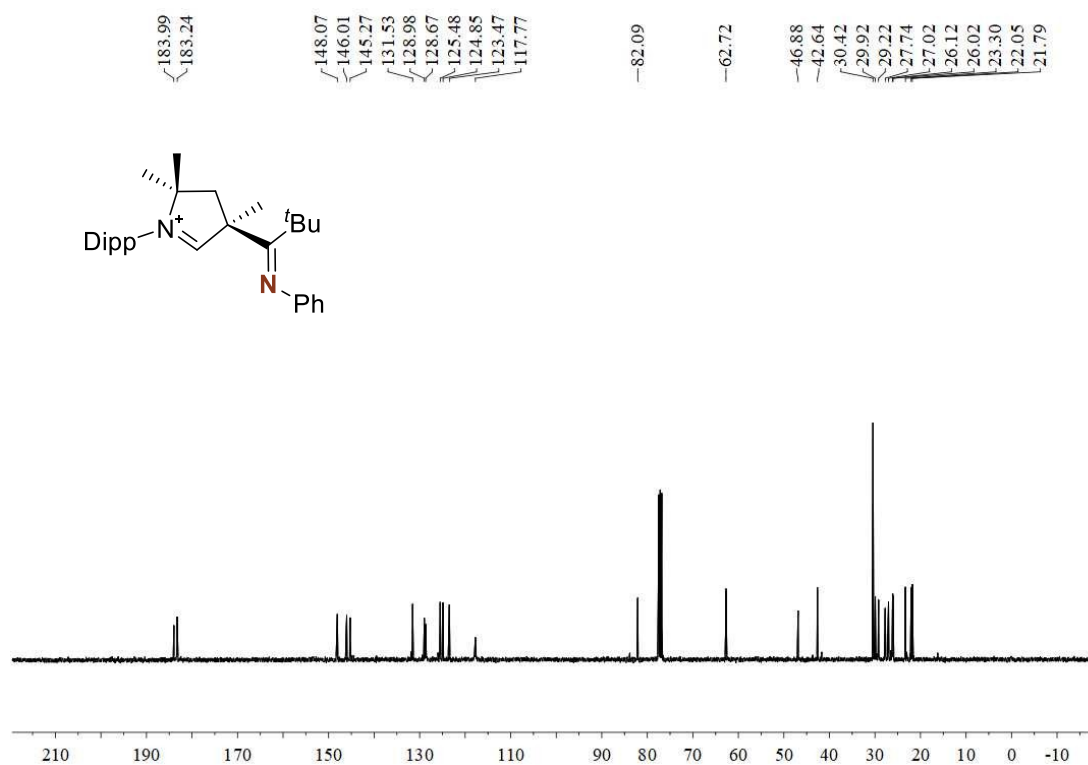

Supplementary Figure S24.  $^{13}\text{C}$  NMR spectrum for 16 (100 MHz,  $\text{CDCl}_3$ , 25 °C).

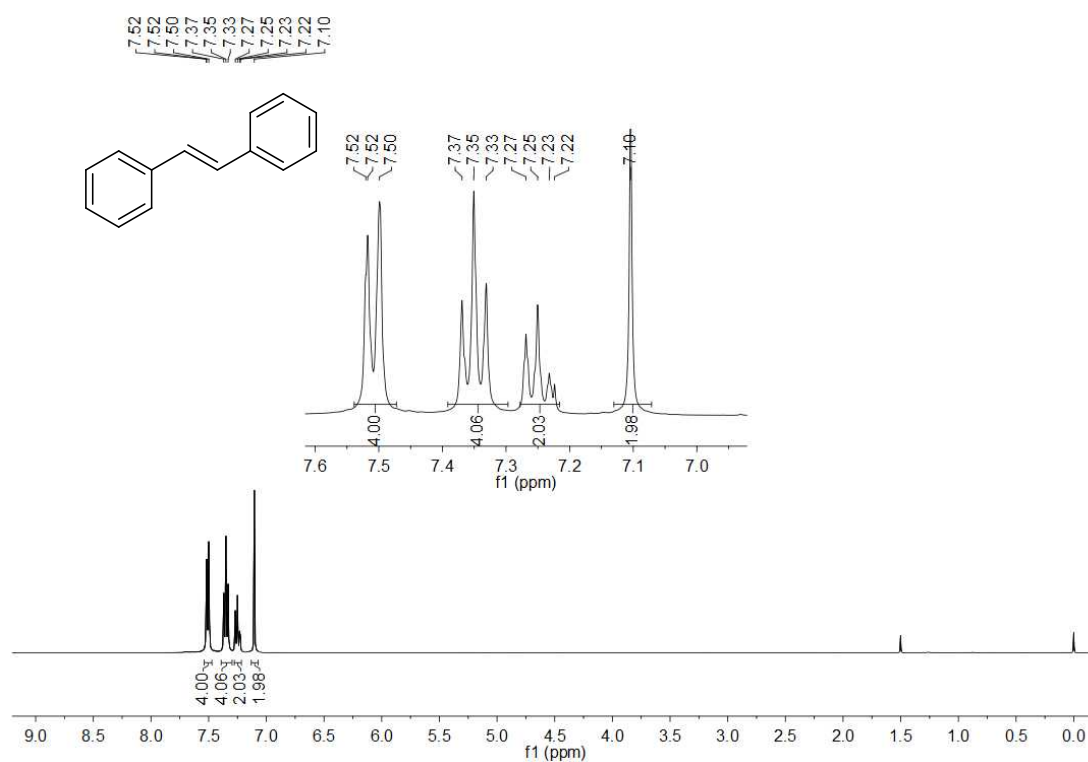

**Supplementary Figure S25.** <sup>1</sup>H NMR spectrum for compound *E*-3a (400 MHz, CDCl<sub>3</sub>, 25 °C).

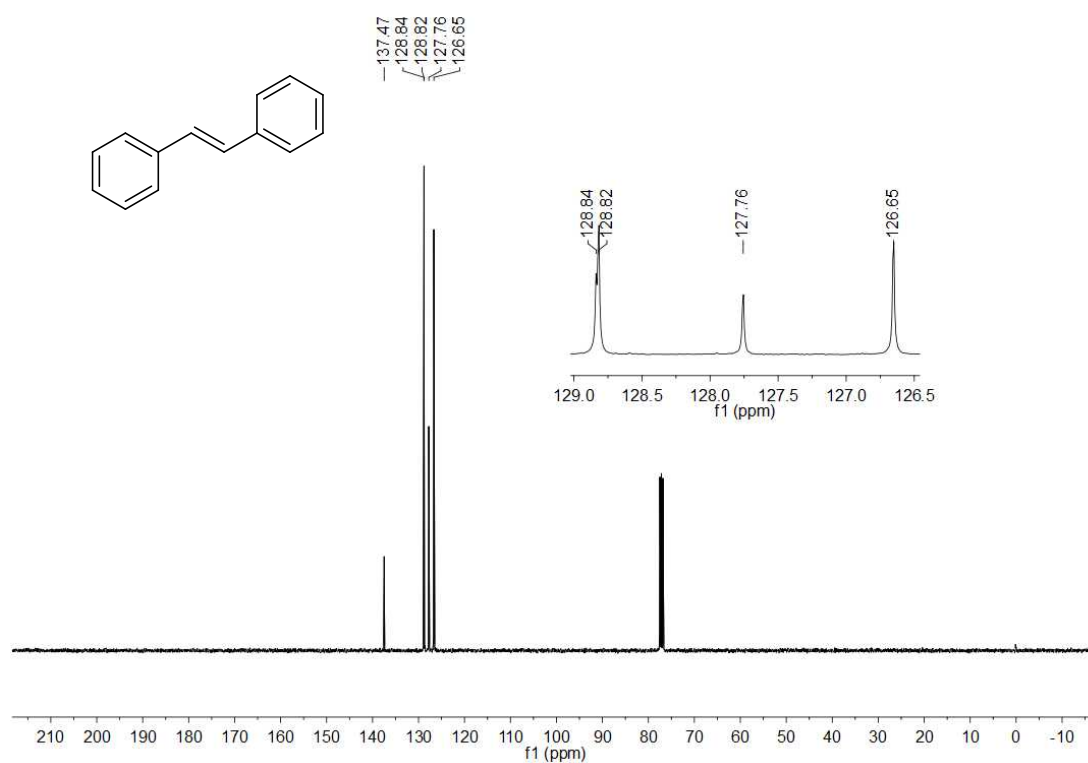

**Supplementary Figure S26.** <sup>13</sup>C NMR spectrum for compound *E*-3a (100 MHz, CDCl<sub>3</sub>, 25 °C).

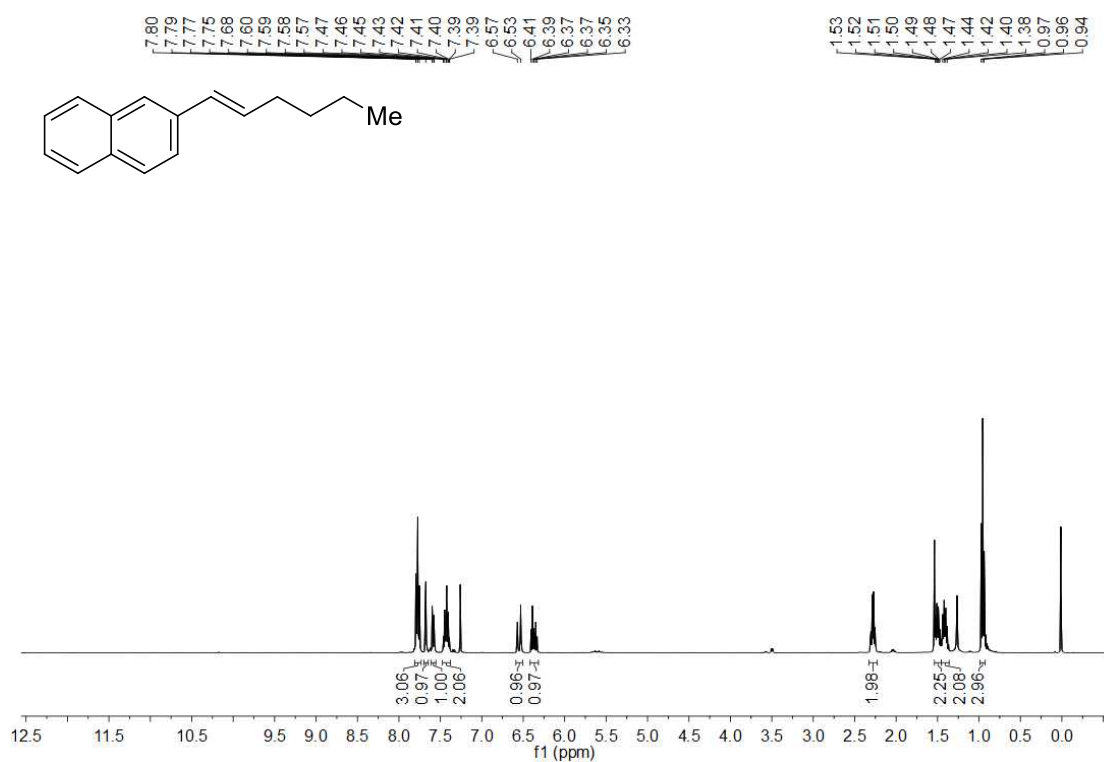

**Supplementary Figure S27.** <sup>1</sup>H NMR spectrum for compound *E*-3b (400 MHz, CDCl<sub>3</sub>, 25 °C).

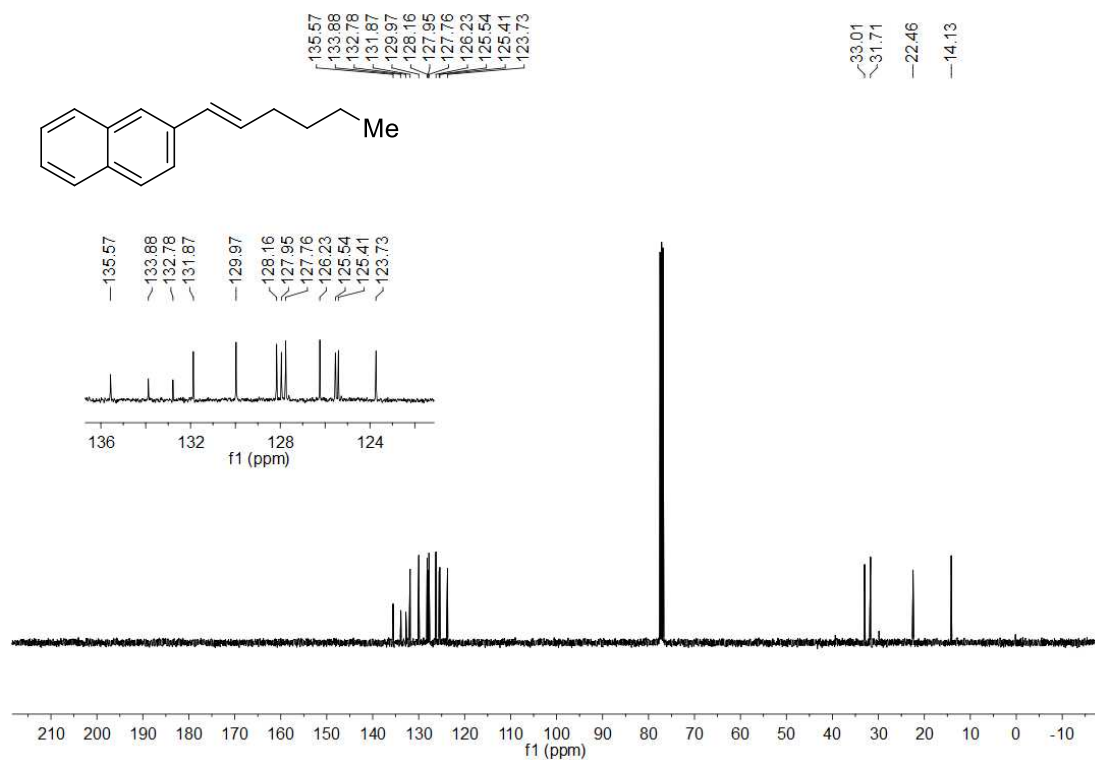

**Supplementary Figure S28.** <sup>13</sup>C NMR spectrum for compound *E*-3b (100 MHz, CDCl<sub>3</sub>, 25 °C).

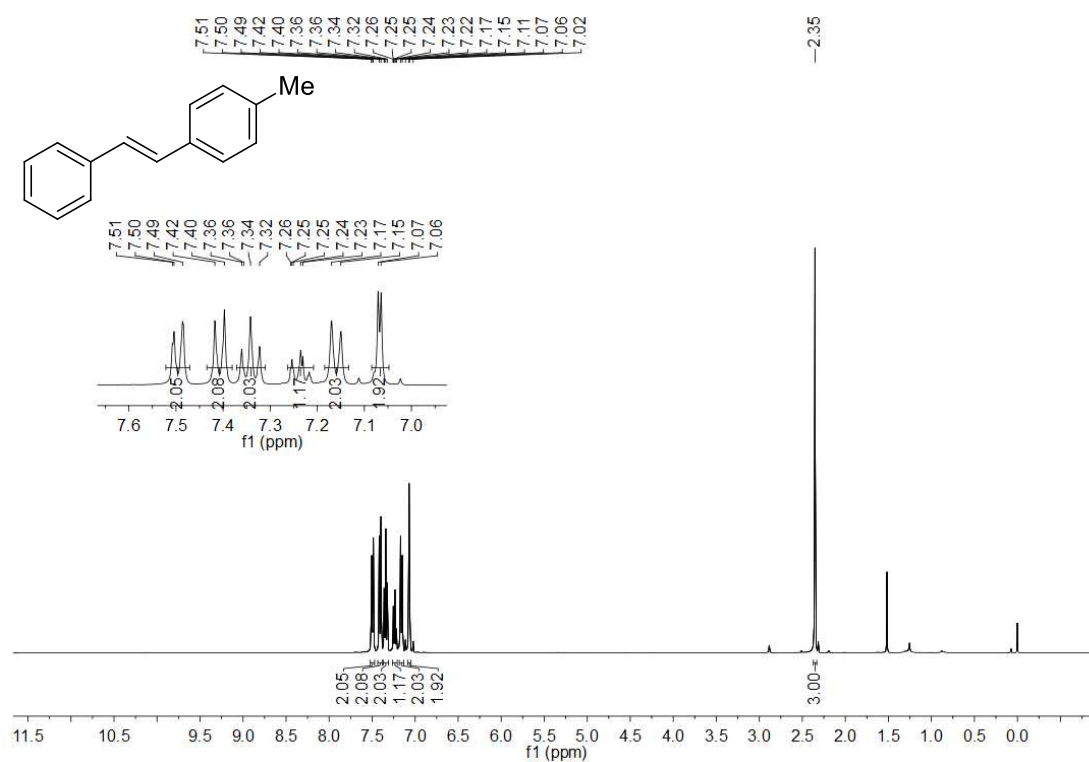

**Supplementary Figure S29.** <sup>1</sup>H NMR spectrum for compound *E*-3c (400 MHz, CDCl<sub>3</sub>, 25 °C).

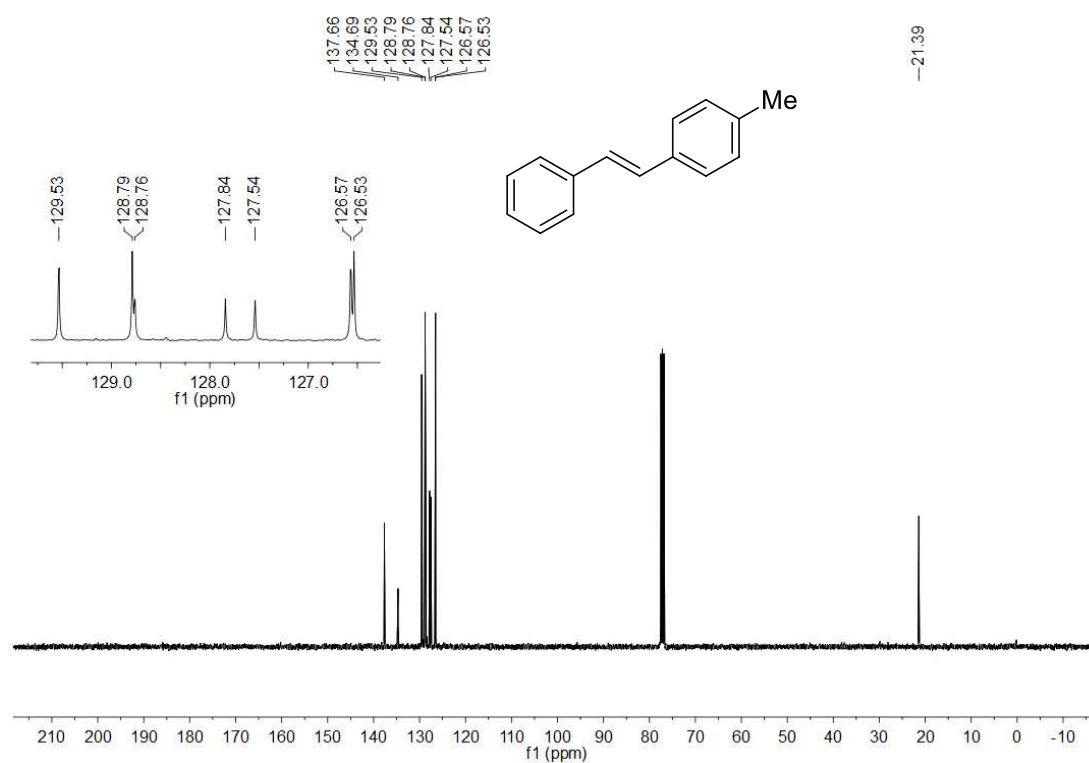

**Supplementary Figure S30.** <sup>13</sup>C NMR spectrum for compound *E*-3c (100 MHz, CDCl<sub>3</sub>, 25 °C).

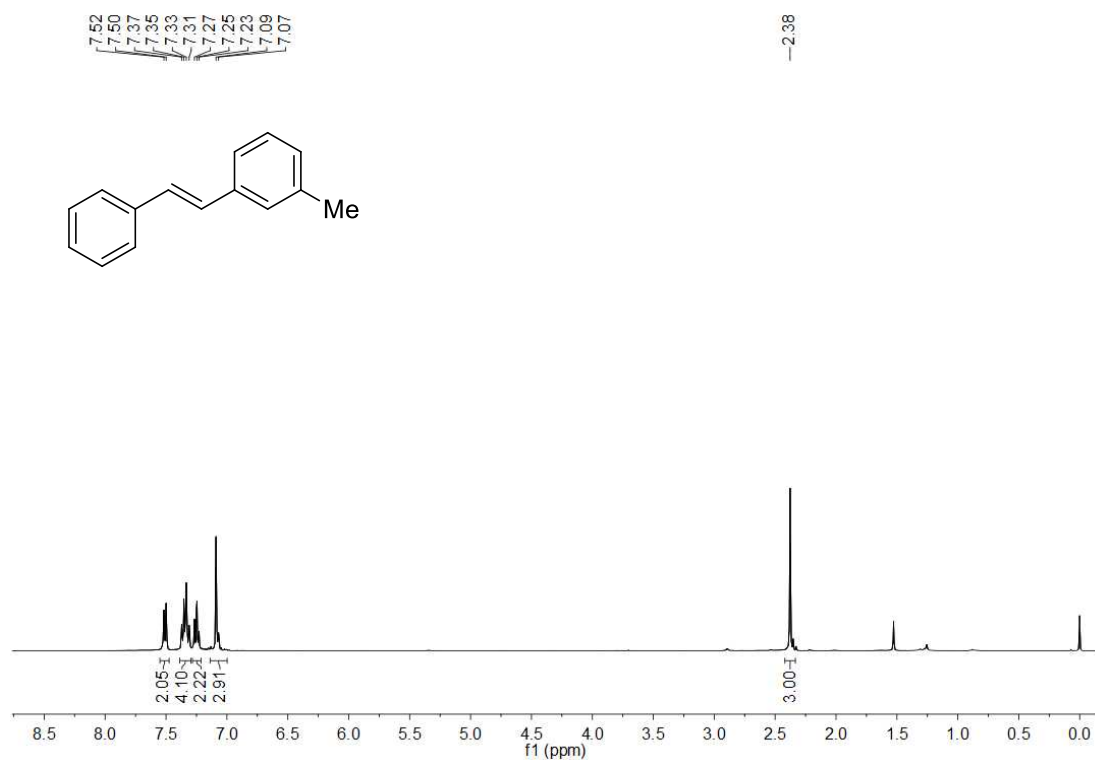

**Supplementary Figure S31.** <sup>1</sup>H NMR spectrum for compound *E*-3d (400 MHz, CDCl<sub>3</sub>, 25 °C).

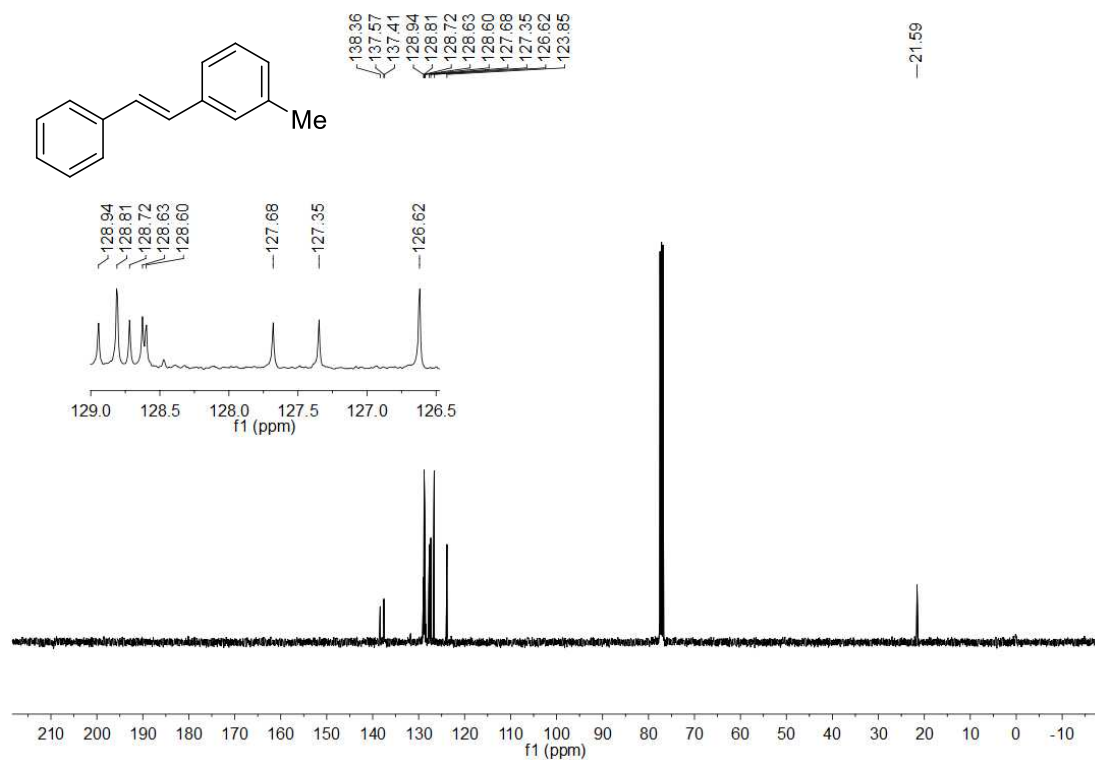

**Supplementary Figure S32.** <sup>13</sup>C NMR spectrum for compound *E*-3d (100 MHz, CDCl<sub>3</sub>, 25 °C).

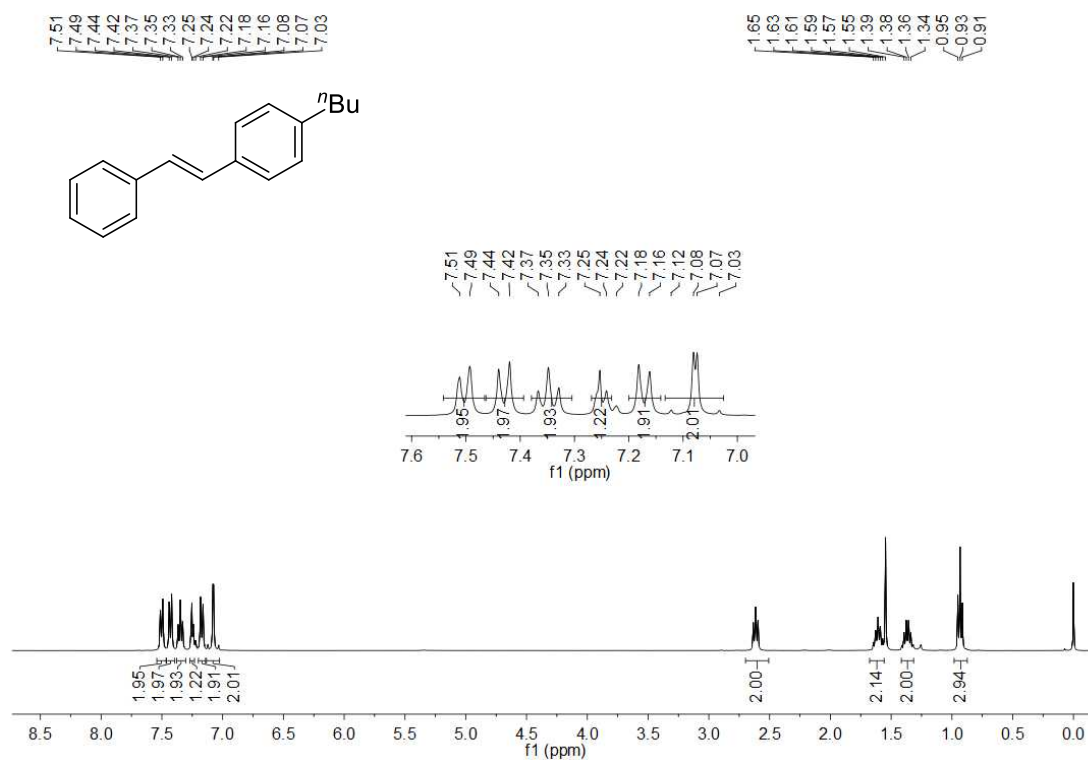

**Supplementary Figure S33.** <sup>1</sup>H NMR spectrum for compound *E*-3e (400 MHz, CDCl<sub>3</sub>, 25 °C).

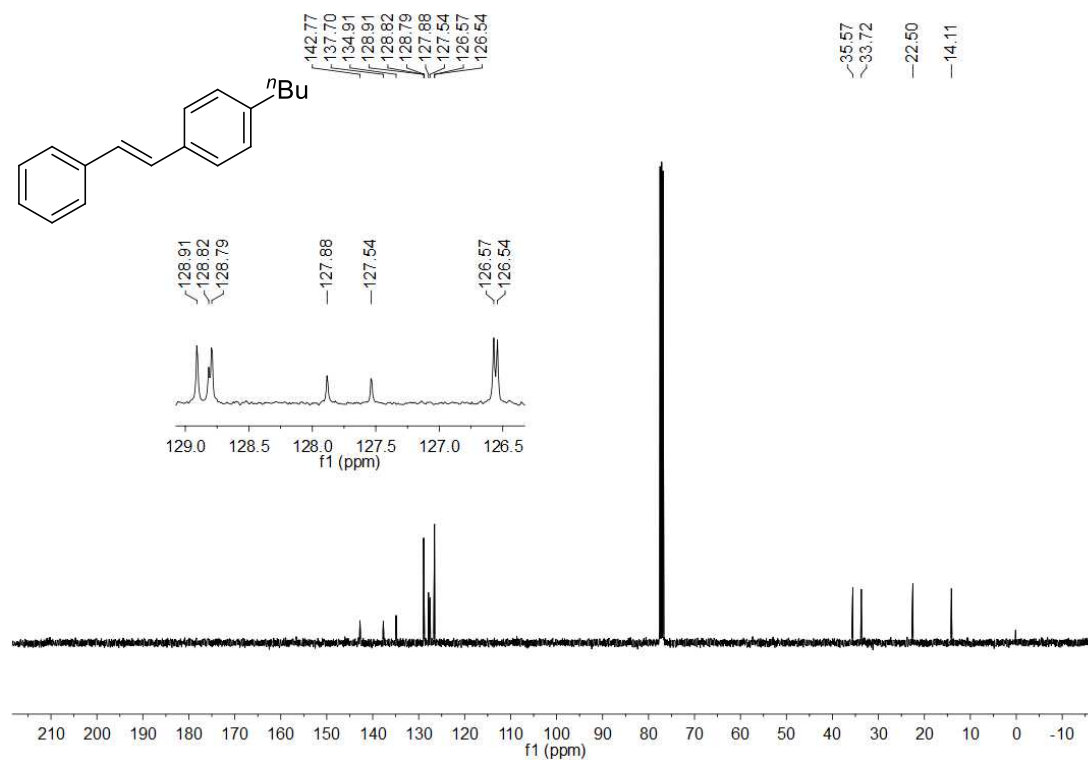

**Supplementary Figure S34.** <sup>13</sup>C NMR spectrum for compound *E*-3e (100 MHz, CDCl<sub>3</sub>, 25 °C).

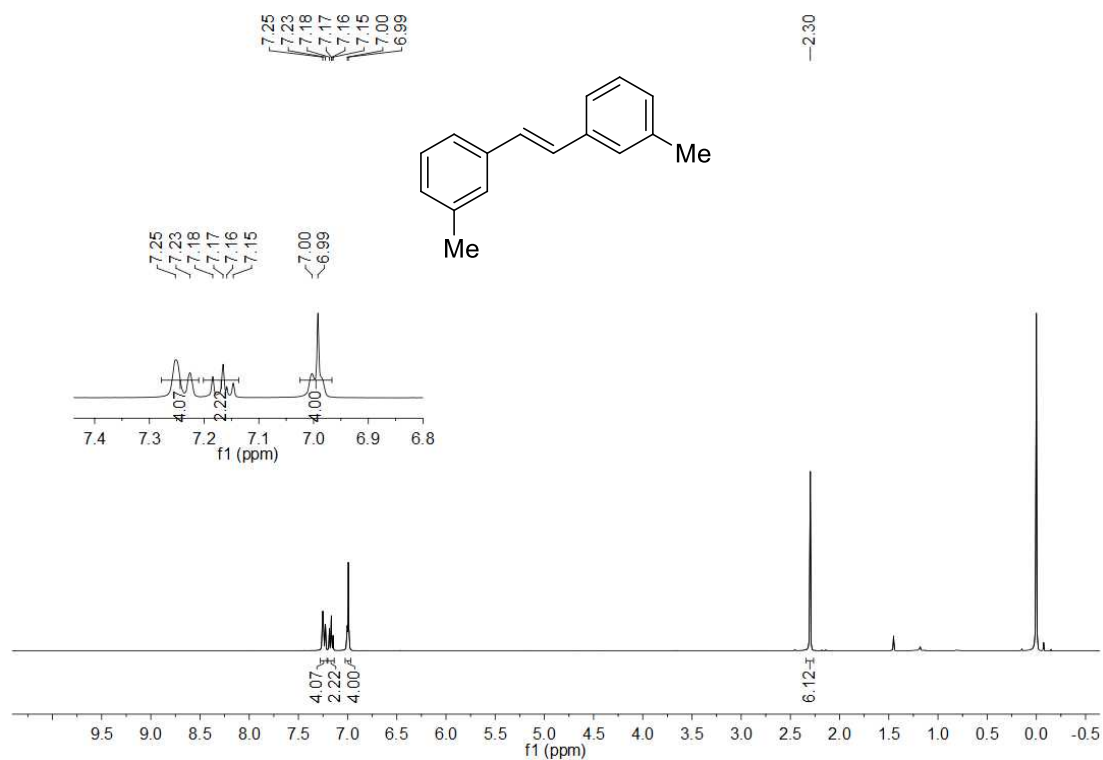

**Supplementary Figure S35.** <sup>1</sup>H NMR spectrum for compound *E*-3f (400 MHz, CDCl<sub>3</sub>, 25 °C).

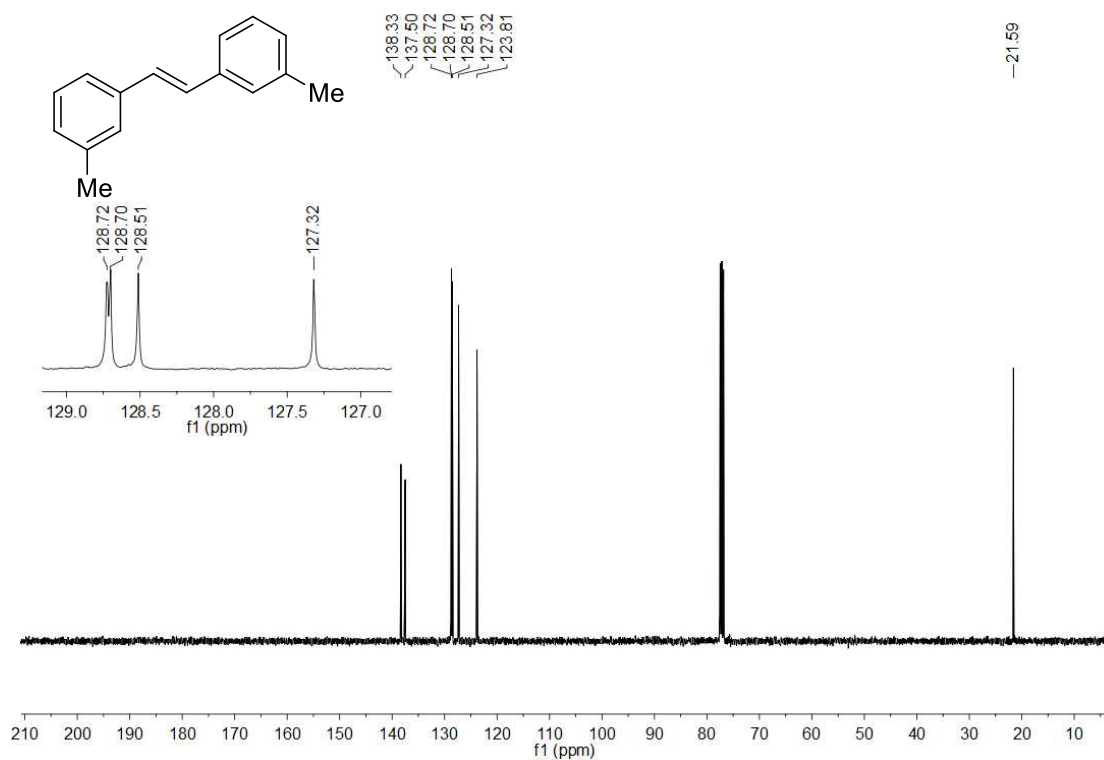

**Supplementary Figure S36.** <sup>13</sup>C NMR spectrum for compound *E*-3f (100 MHz, CDCl<sub>3</sub>, 25 °C).

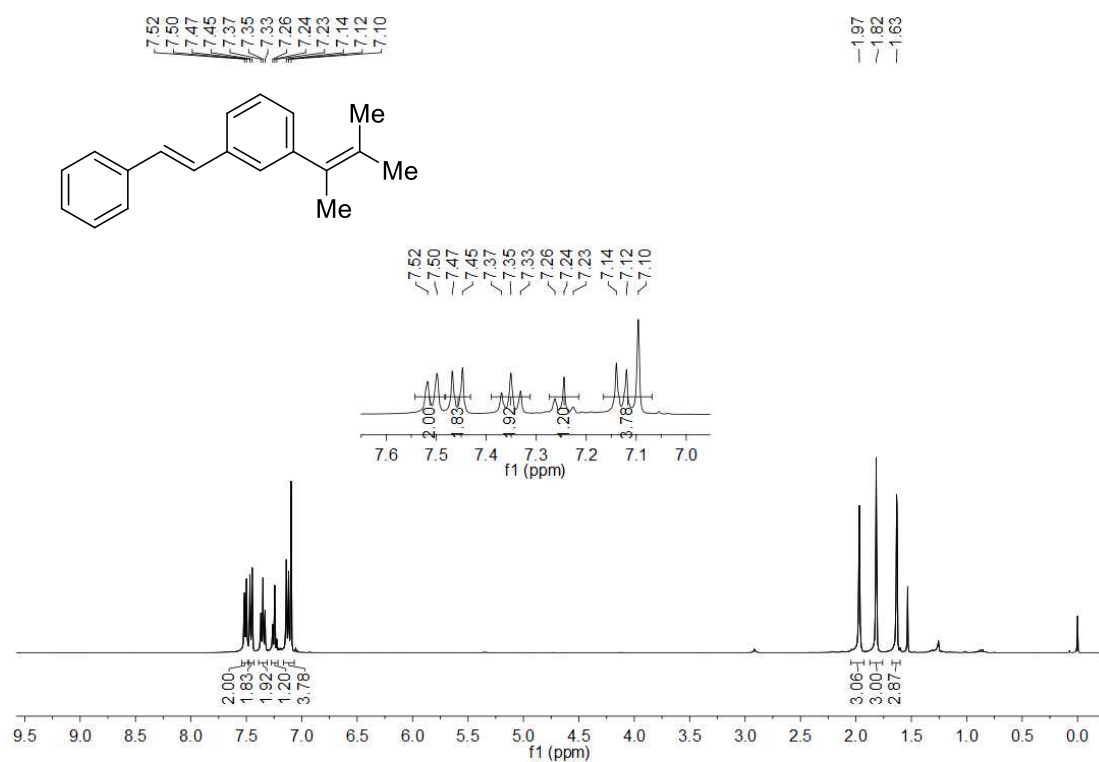

**Supplementary Figure S37. <sup>1</sup>H NMR spectrum for compound *E*-3g (400 MHz, CDCl<sub>3</sub>, 25 °C).**

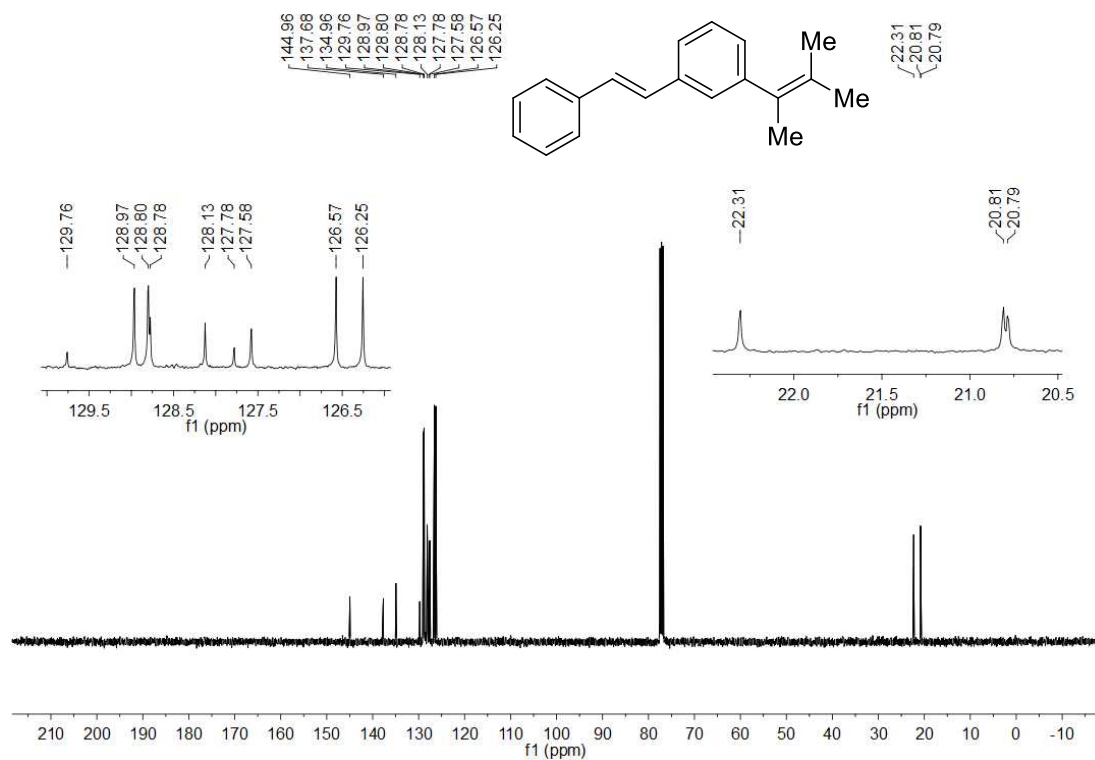

**Supplementary Figure S38. <sup>13</sup>C NMR spectrum for compound *E*-3g (100 MHz, CDCl<sub>3</sub>, 25 °C).**



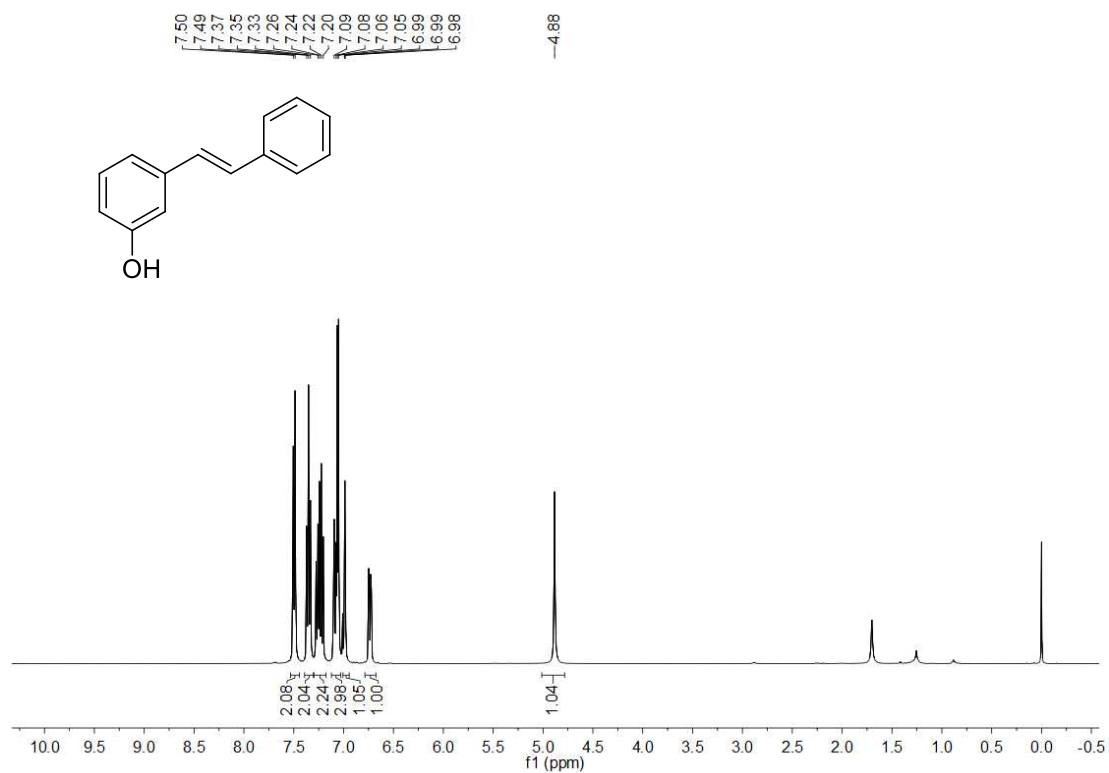

**Supplementary Figure S39.** <sup>1</sup>H NMR spectrum for compound *E*-3h (400 MHz, CDCl<sub>3</sub>, 25 °C).

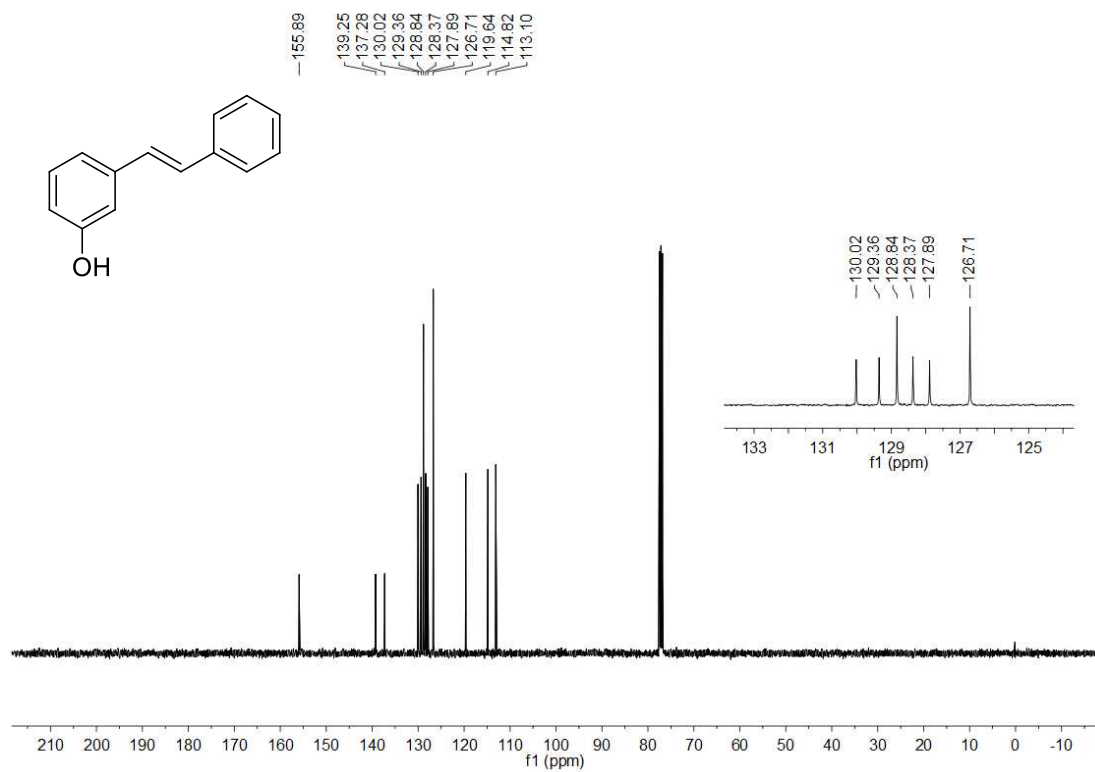

**Supplementary Figure S40.** <sup>13</sup>C NMR spectrum for compound *E*-3h (100 MHz, CDCl<sub>3</sub>, 25 °C).

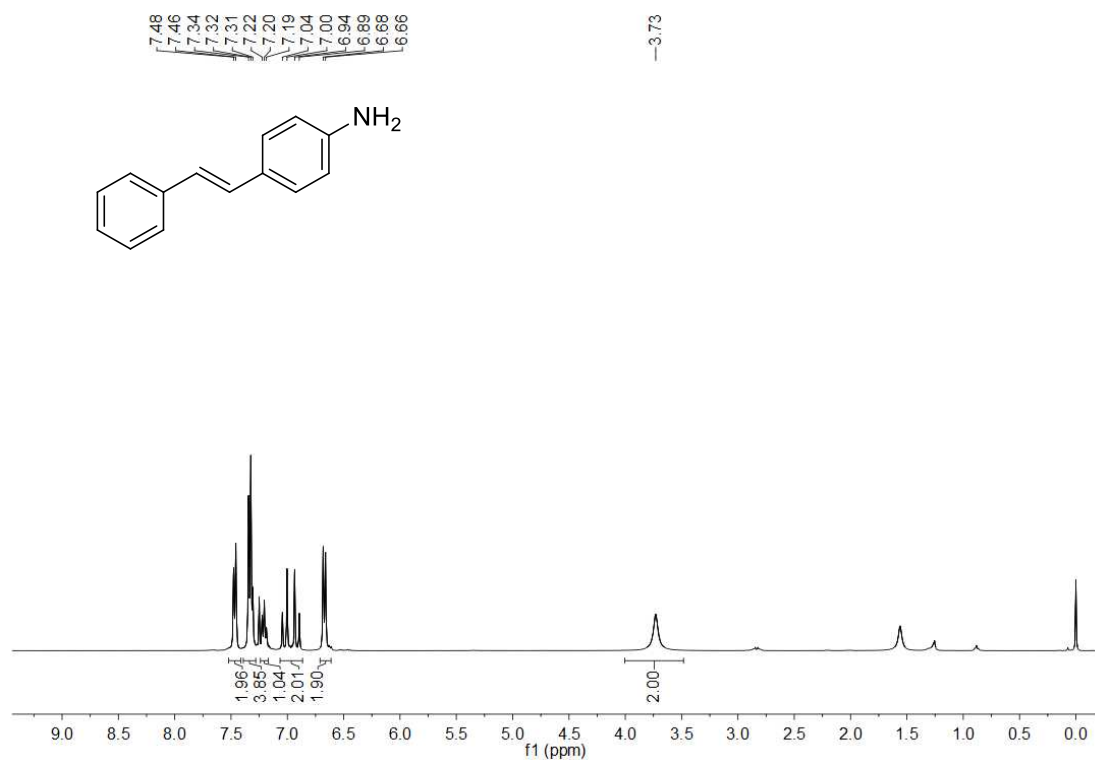

**Supplementary Figure S41.** <sup>1</sup>H NMR spectrum for compound *E*-3i (400 MHz, CDCl<sub>3</sub>, 25 °C).

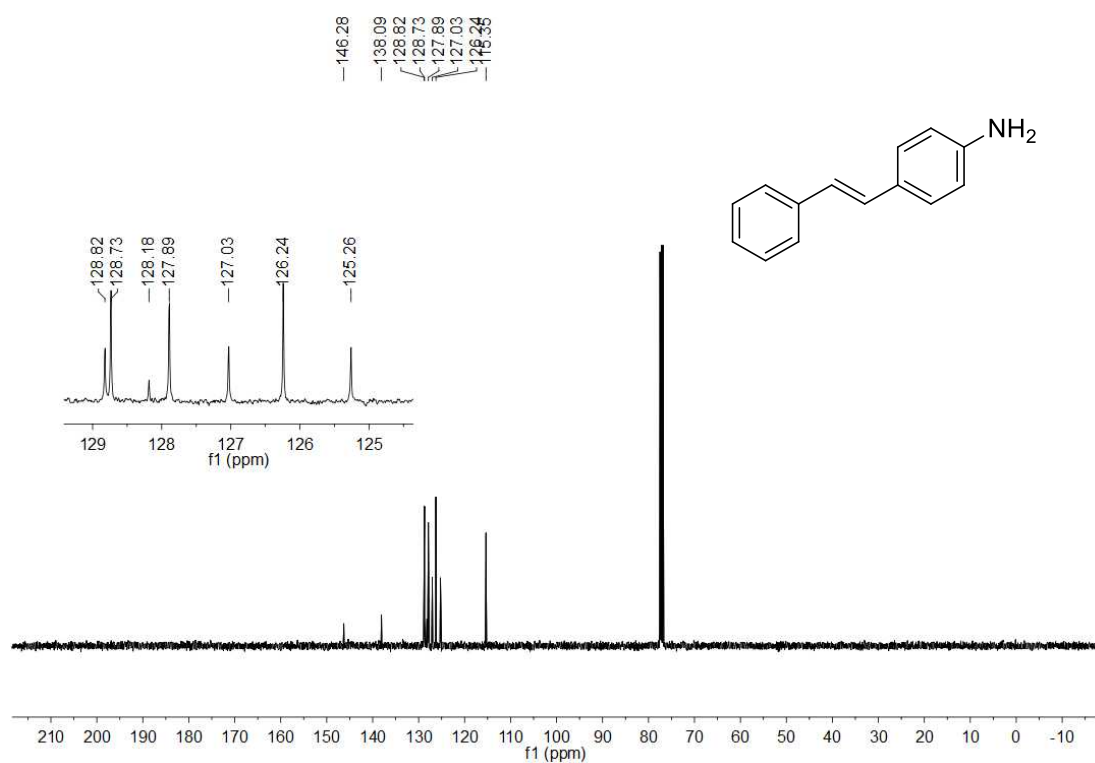

**Supplementary Figure S42.** <sup>13</sup>C NMR spectrum for compound *E*-3i (100 MHz, CDCl<sub>3</sub>, 25 °C).

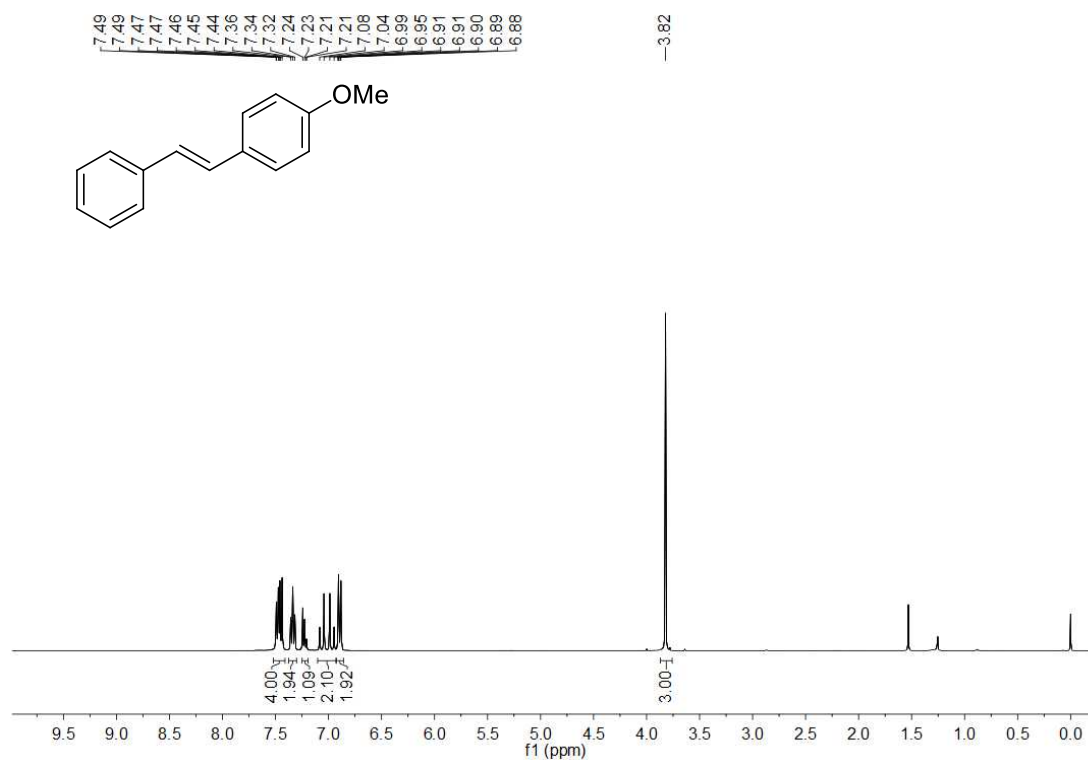

**Supplementary Figure S43.** <sup>1</sup>H NMR spectrum for compound *E*-3j (400 MHz, CDCl<sub>3</sub>, 25 °C).

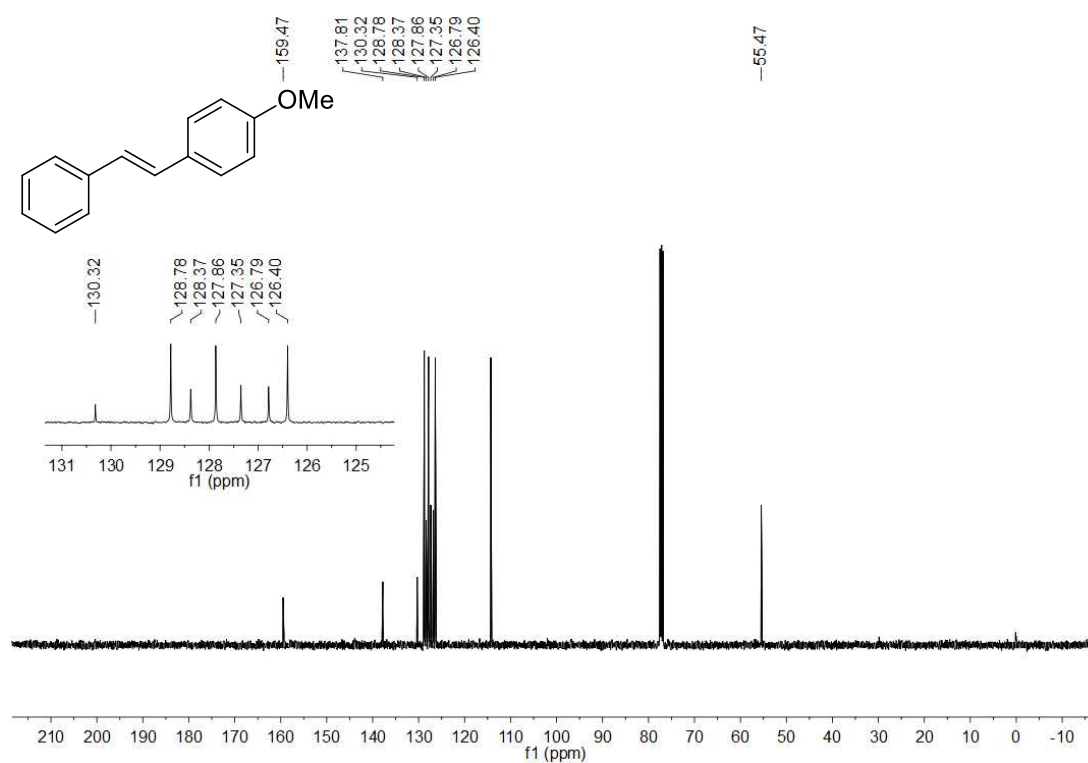

**Supplementary Figure S44.** <sup>13</sup>C NMR spectrum for compound *E*-3j (100 MHz, CDCl<sub>3</sub>, 25 °C).

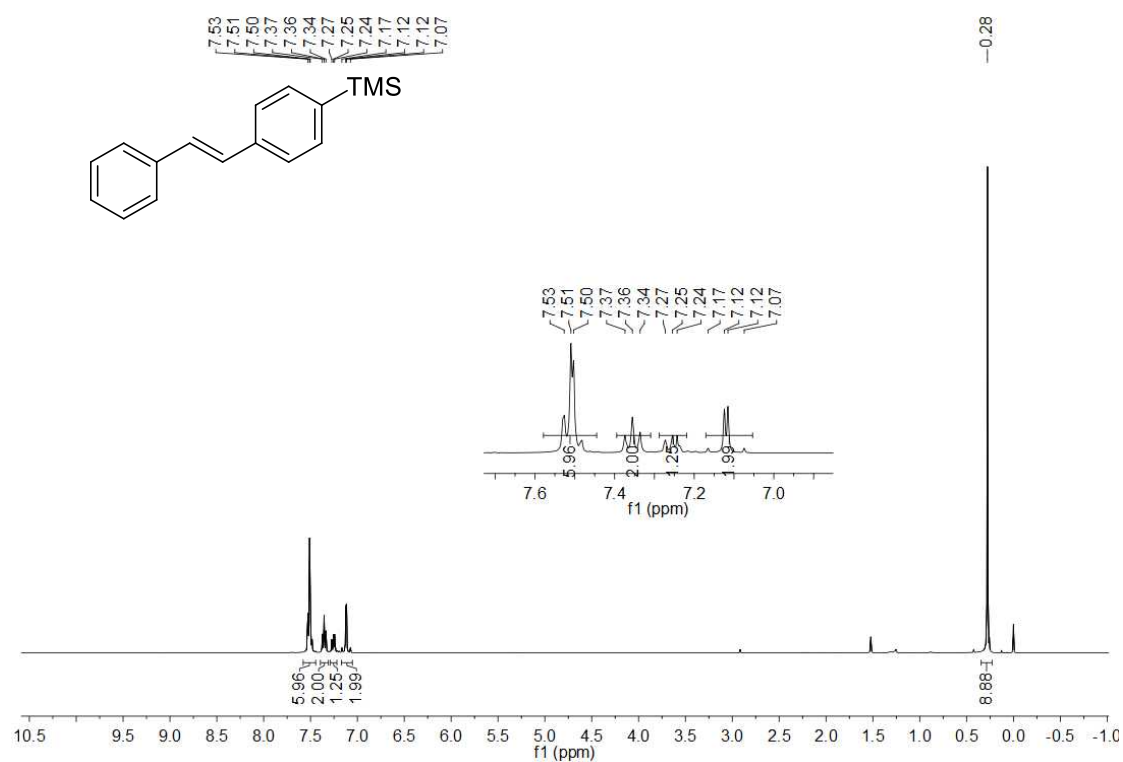

**Supplementary Figure S45.** <sup>1</sup>H NMR spectrum for compound *E*-3k (400 MHz, CDCl<sub>3</sub>, 25 °C).

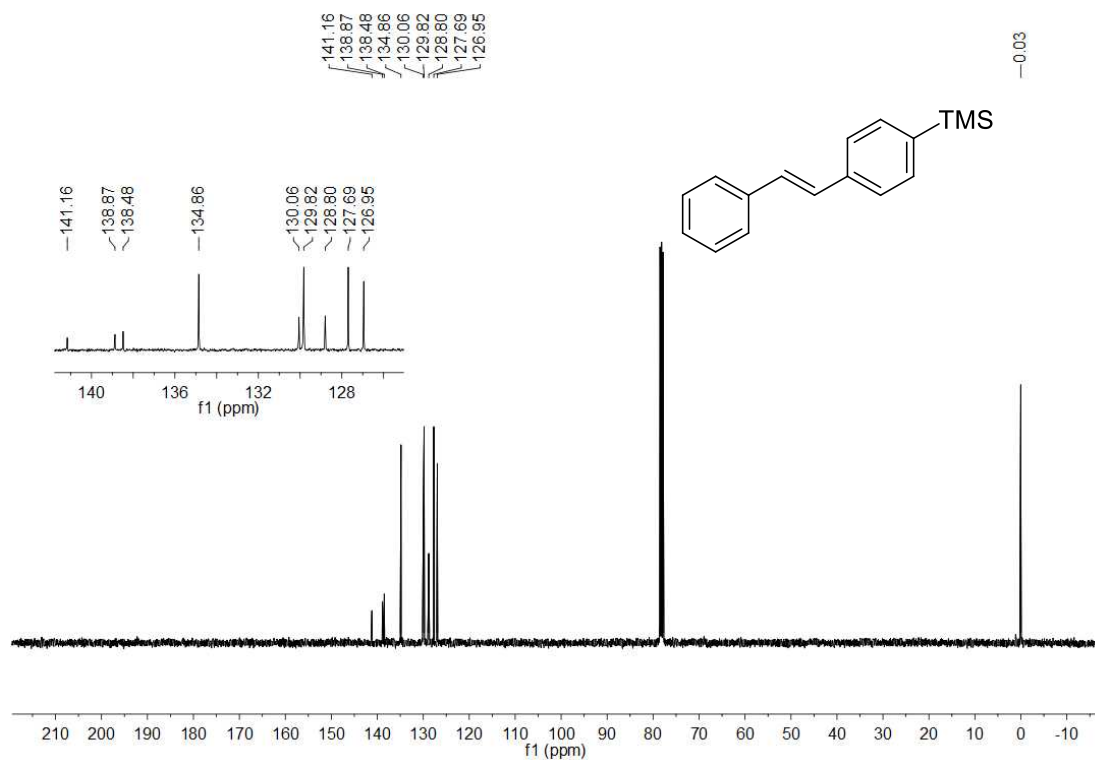

**Supplementary Figure S46.** <sup>13</sup>C NMR spectrum for compound *E*-3k (100 MHz, CDCl<sub>3</sub>, 25 °C).

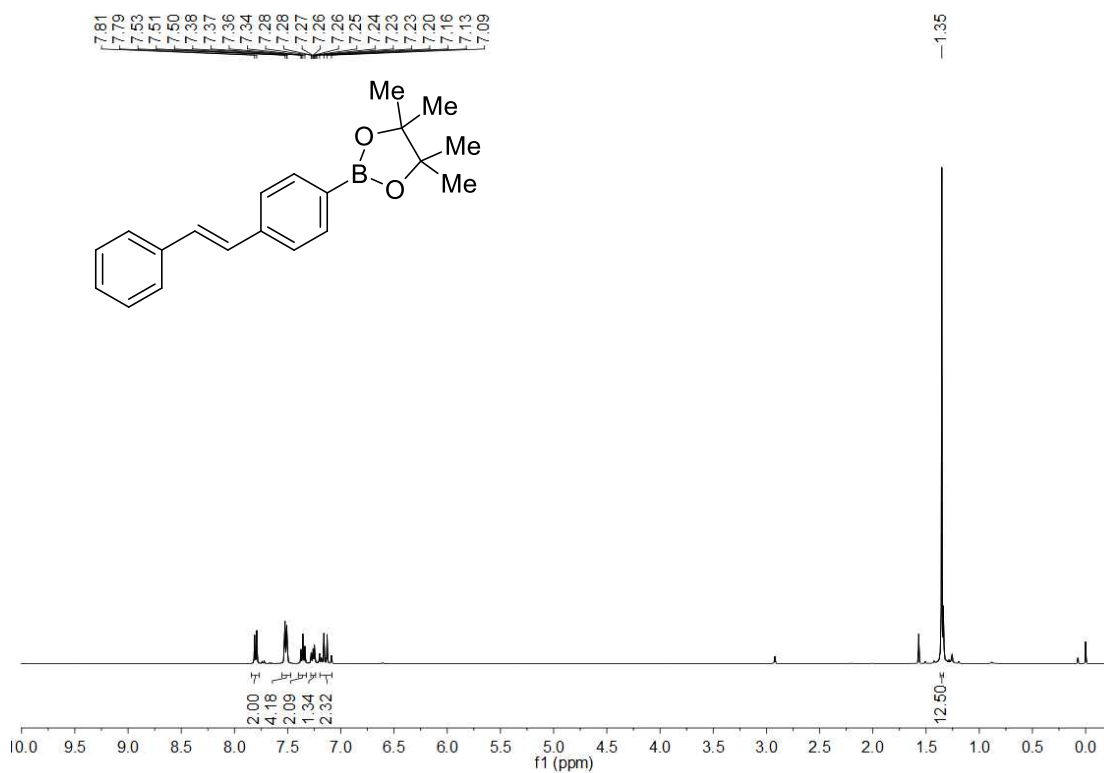

**Supplementary Figure S47.** <sup>1</sup>H NMR spectrum for compound *E*-3l (400 MHz, CDCl<sub>3</sub>, 25 °C).

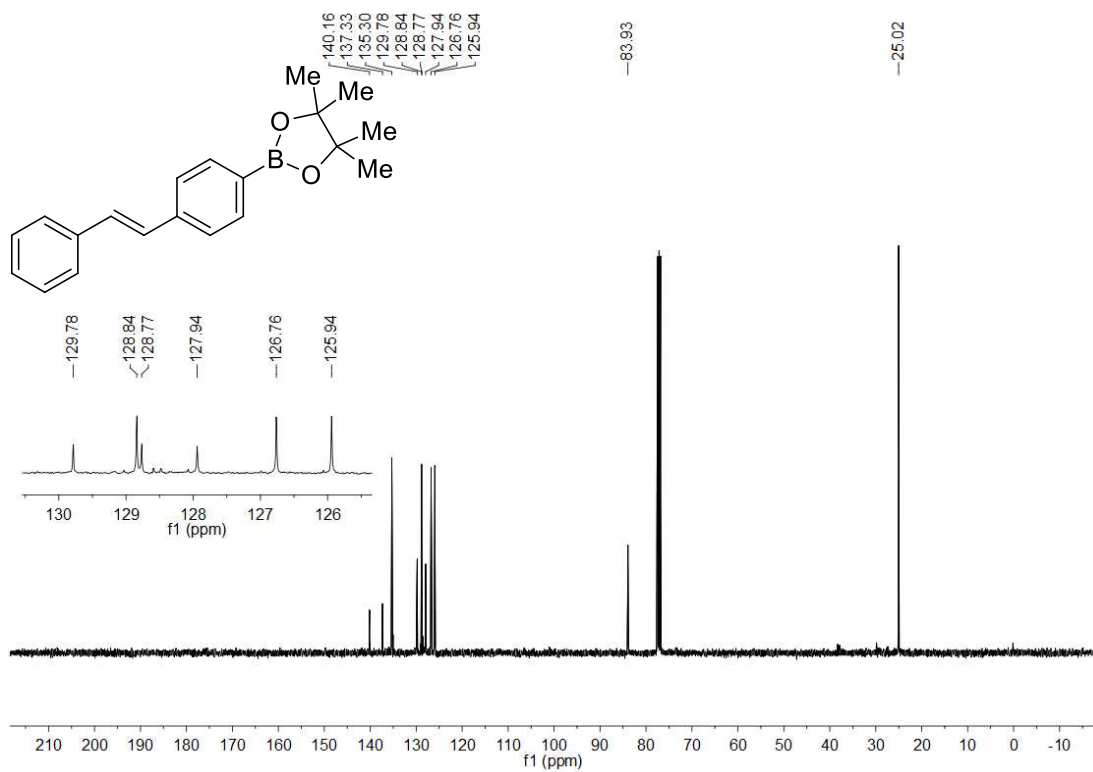

**Supplementary Figure S48.** <sup>13</sup>C NMR spectrum for compound *E*-3l (100 MHz, CDCl<sub>3</sub>, 25 °C).

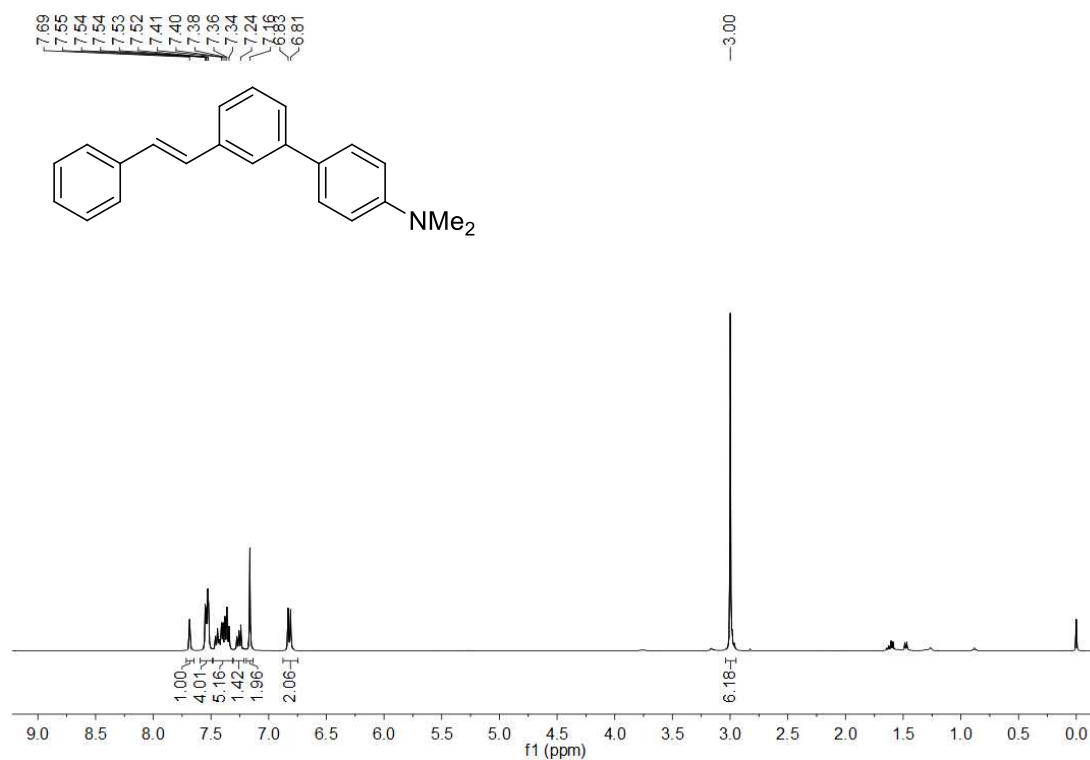

**Supplementary Figure S49.** <sup>1</sup>H NMR spectrum for compound *E*-3m (400 MHz, CDCl<sub>3</sub>, 25 °C).

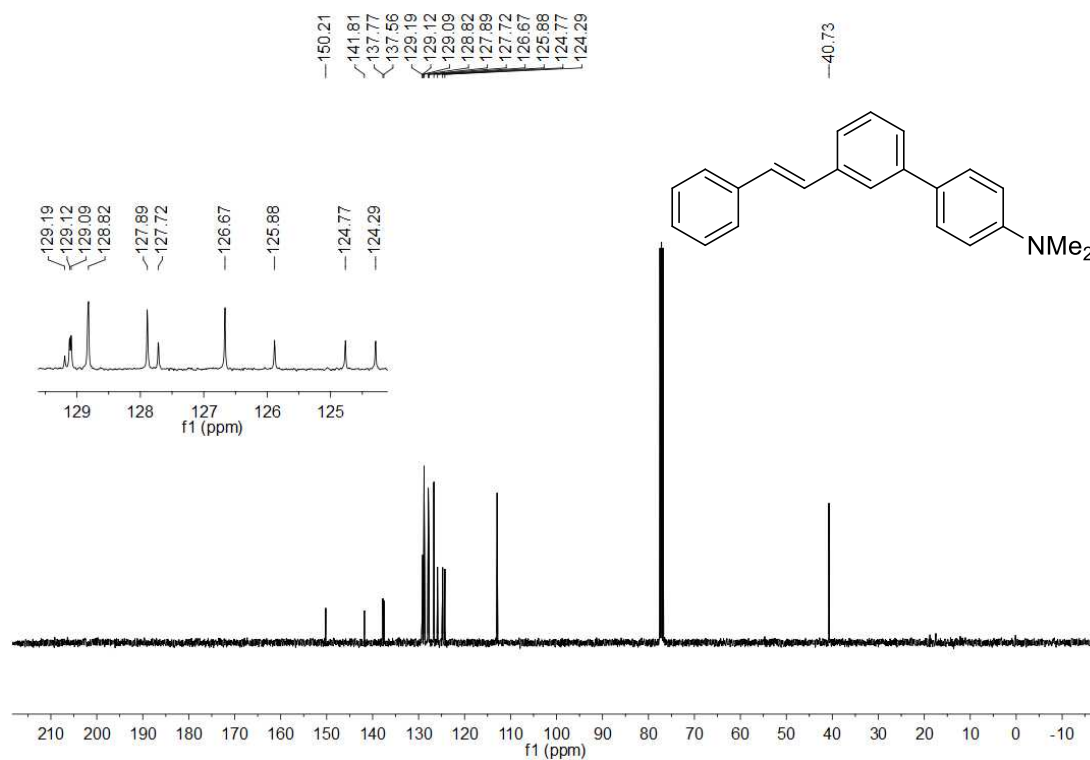

**Supplementary Figure S50.** <sup>13</sup>C NMR spectrum for compound *E*-3m (100 MHz, CDCl<sub>3</sub>, 25 °C).

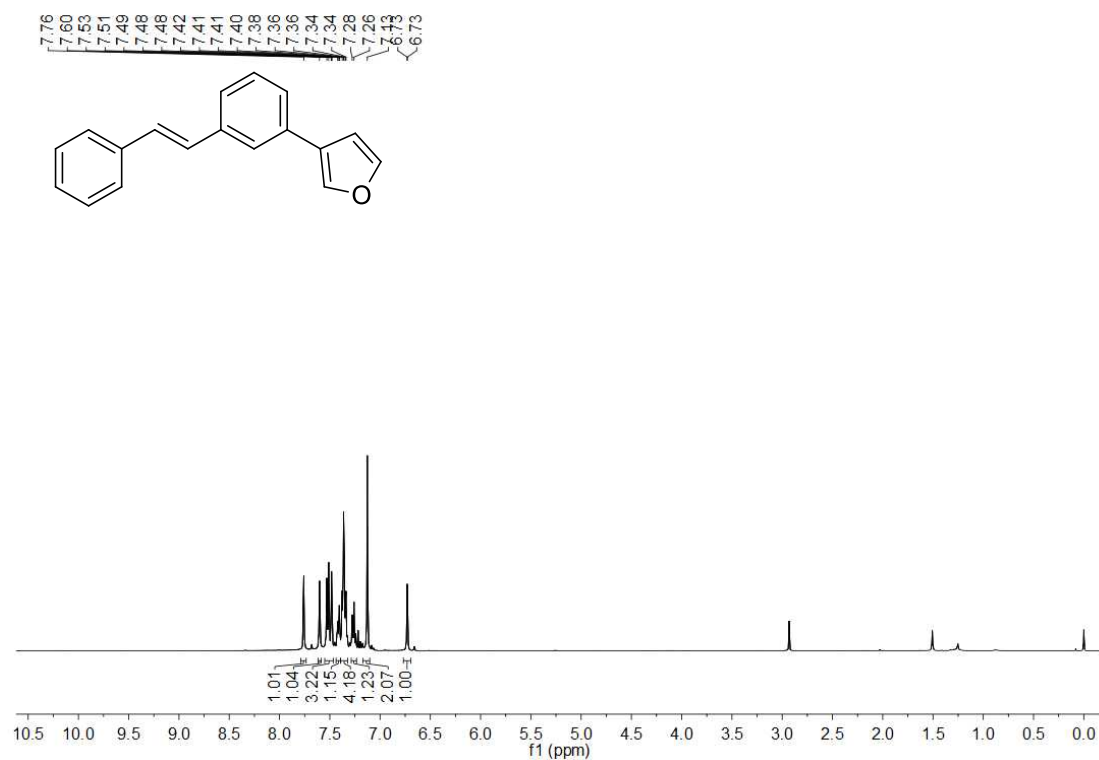

**Supplementary Figure S51.** <sup>1</sup>H NMR spectrum for compound *E*-3n (400 MHz, CDCl<sub>3</sub>, 25 °C).

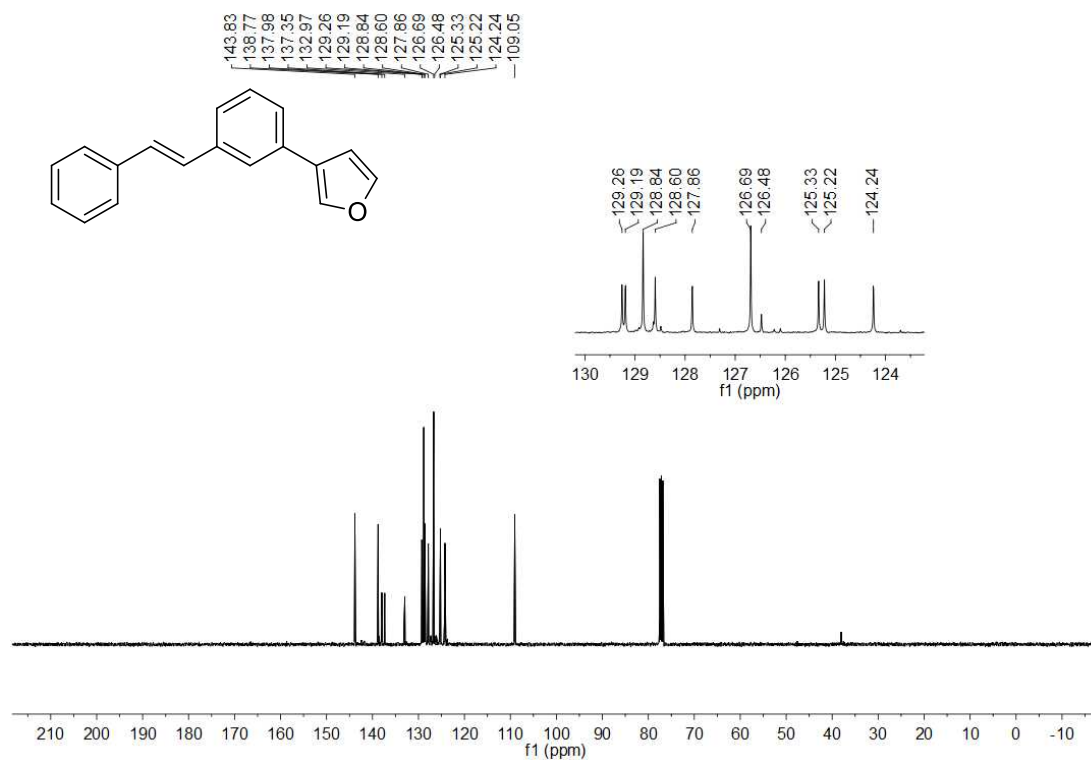

**Supplementary Figure S52.** <sup>13</sup>C NMR spectrum for compound *E*-3n (100 MHz, CDCl<sub>3</sub>, 25 °C).

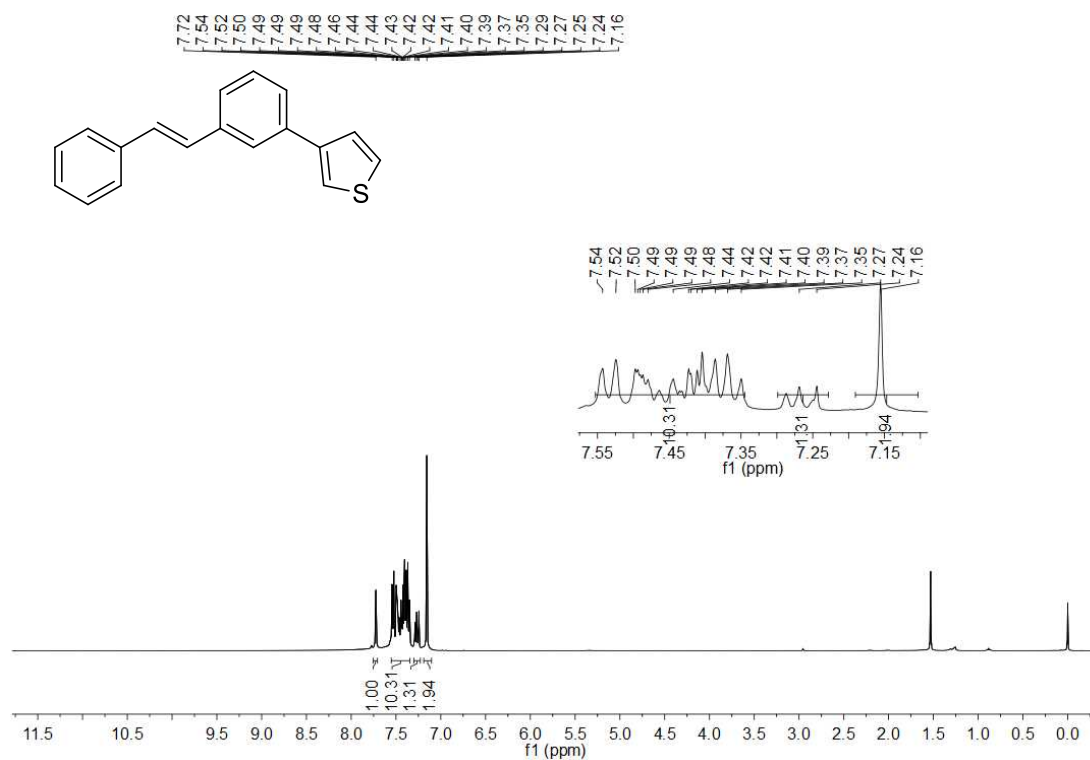

**Supplementary Figure S53.** <sup>1</sup>H NMR spectrum for compound *E*-3o (400 MHz, CDCl<sub>3</sub>, 25 °C).

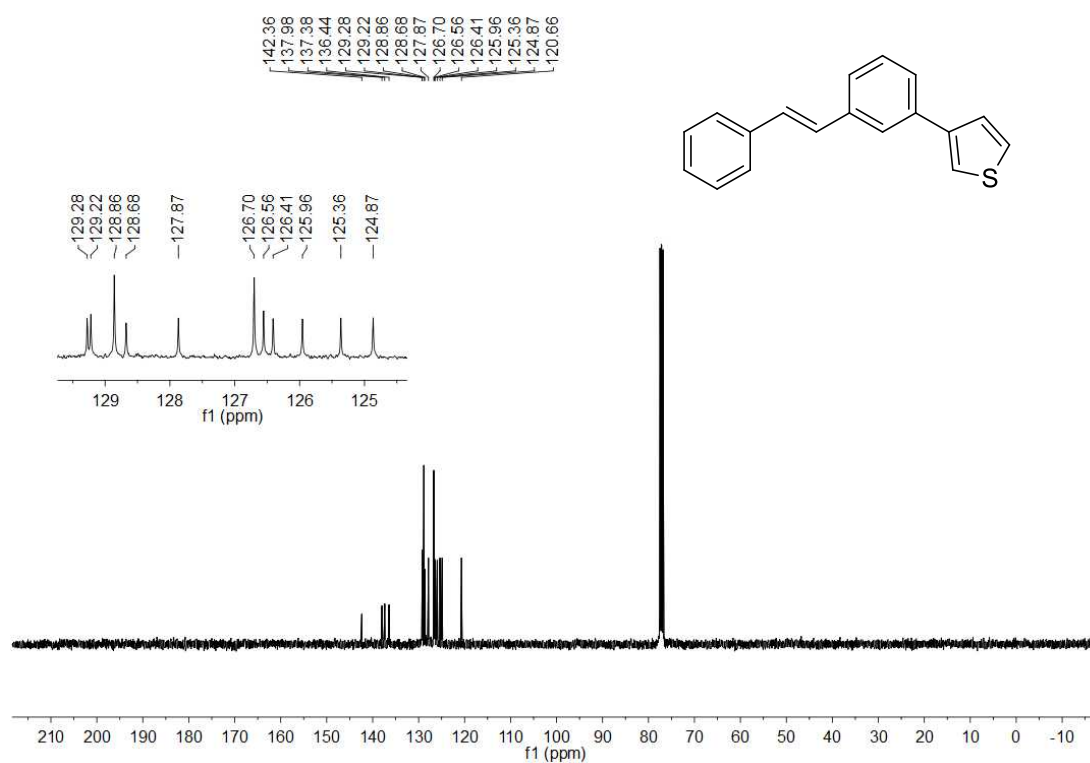

**Supplementary Figure S54.** <sup>13</sup>C NMR spectrum for compound *E*-3o (100 MHz, CDCl<sub>3</sub>, 25 °C).



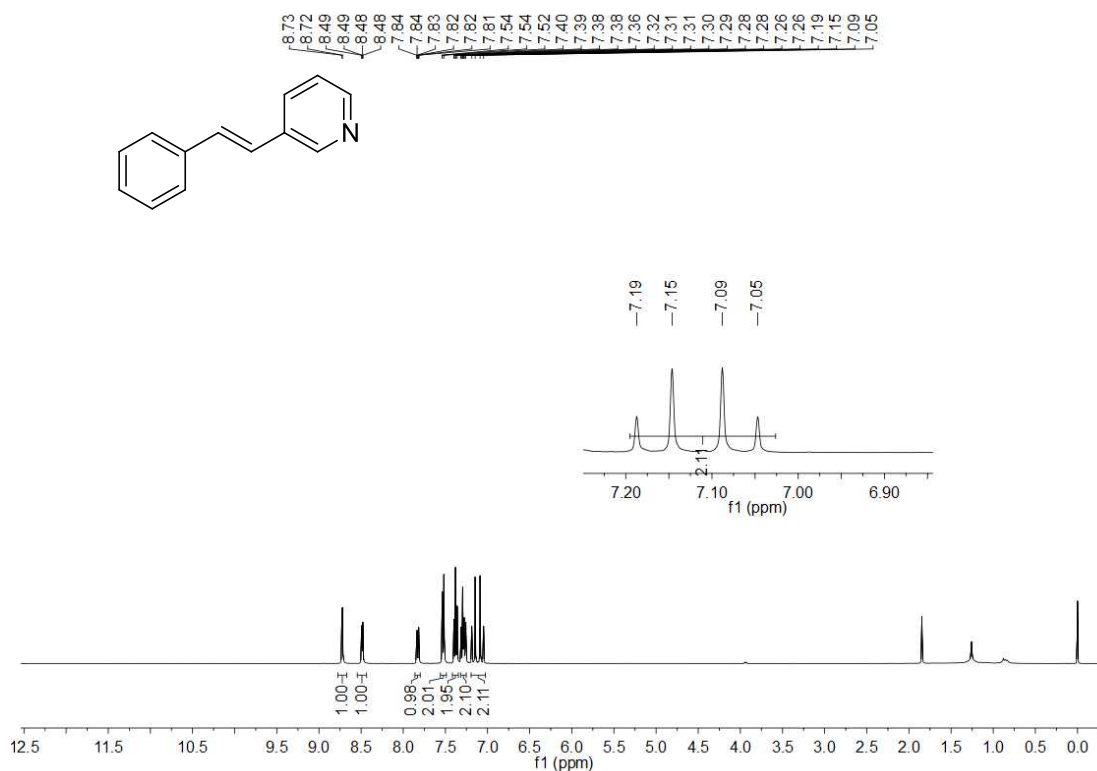

**Supplementary Figure S55.** <sup>1</sup>H NMR spectrum for compound *E*-3p (400 MHz, CDCl<sub>3</sub>, 25 °C).

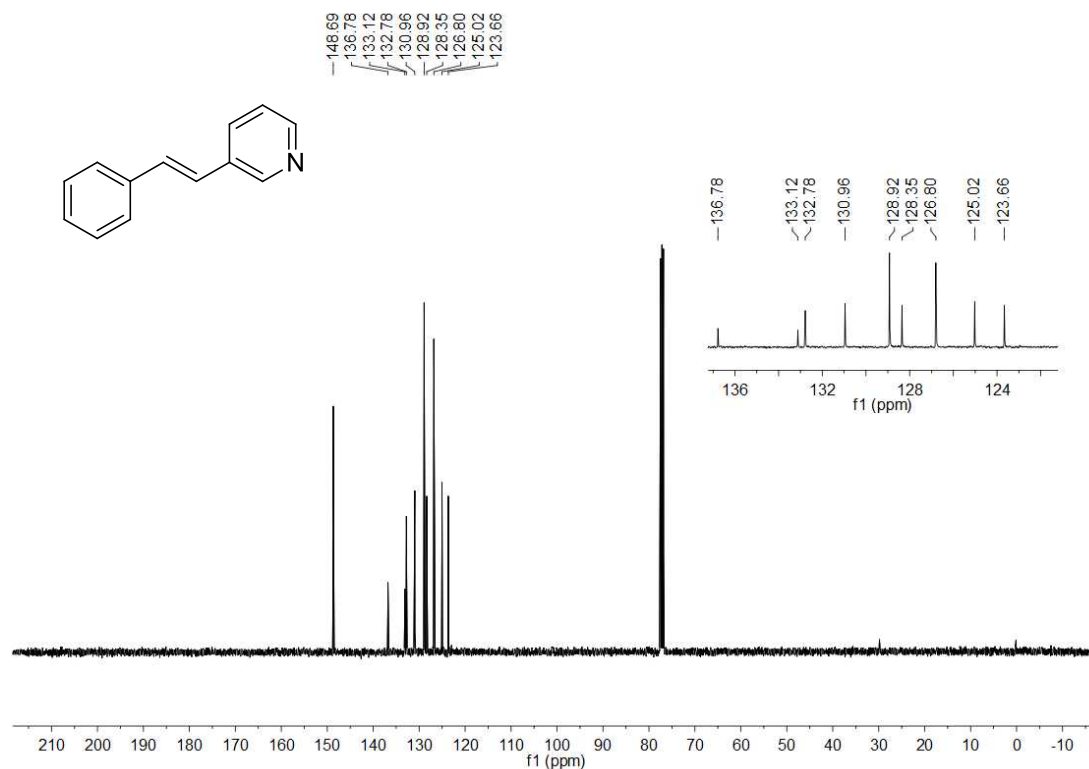

**Supplementary Figure S56.** <sup>13</sup>C NMR spectrum for compound *E*-3p (100 MHz, CDCl<sub>3</sub>, 25 °C).

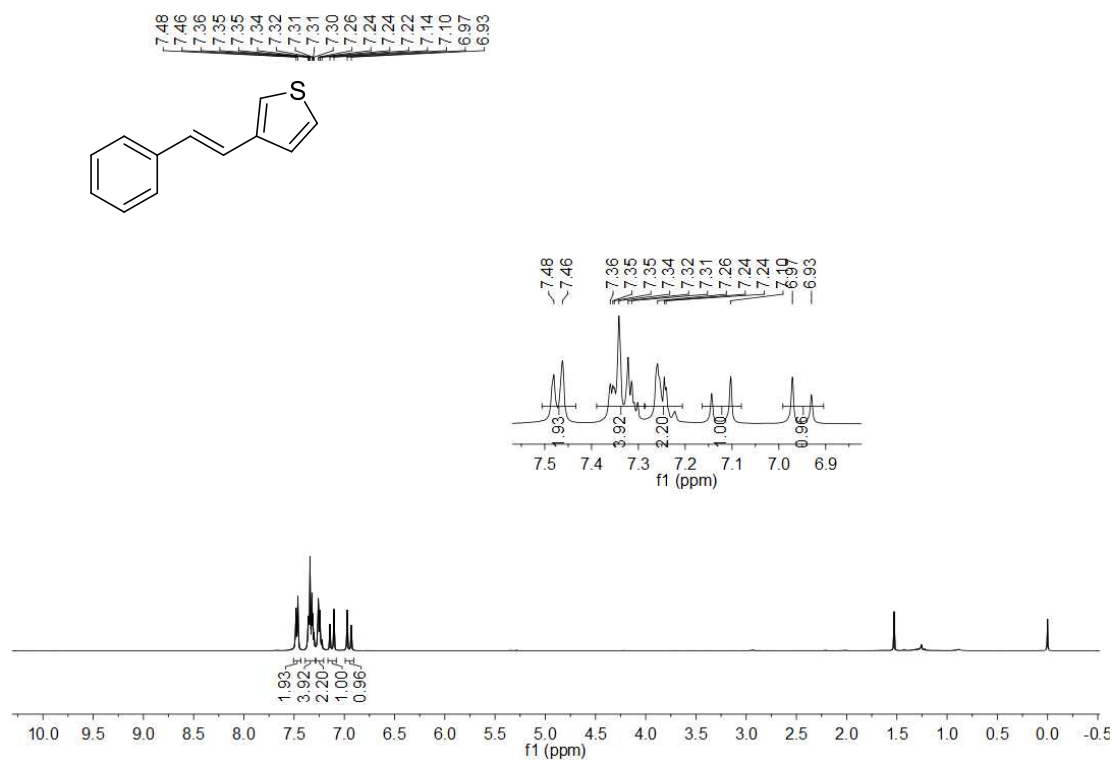

**Supplementary Figure S57.** <sup>1</sup>H NMR spectrum for compound *E*-3q (400 MHz, CDCl<sub>3</sub>, 25 °C).

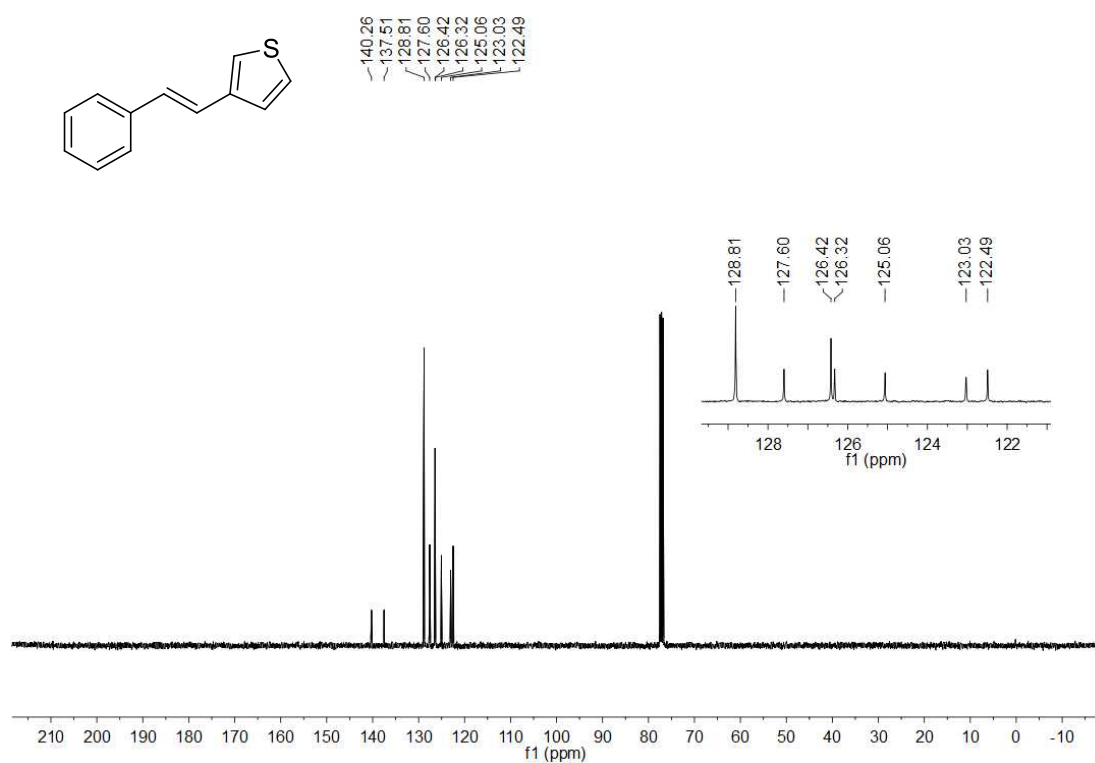

**Supplementary Figure S58.** <sup>13</sup>C NMR spectrum for compound *E*-3q (100 MHz, CDCl<sub>3</sub>, 25 °C).

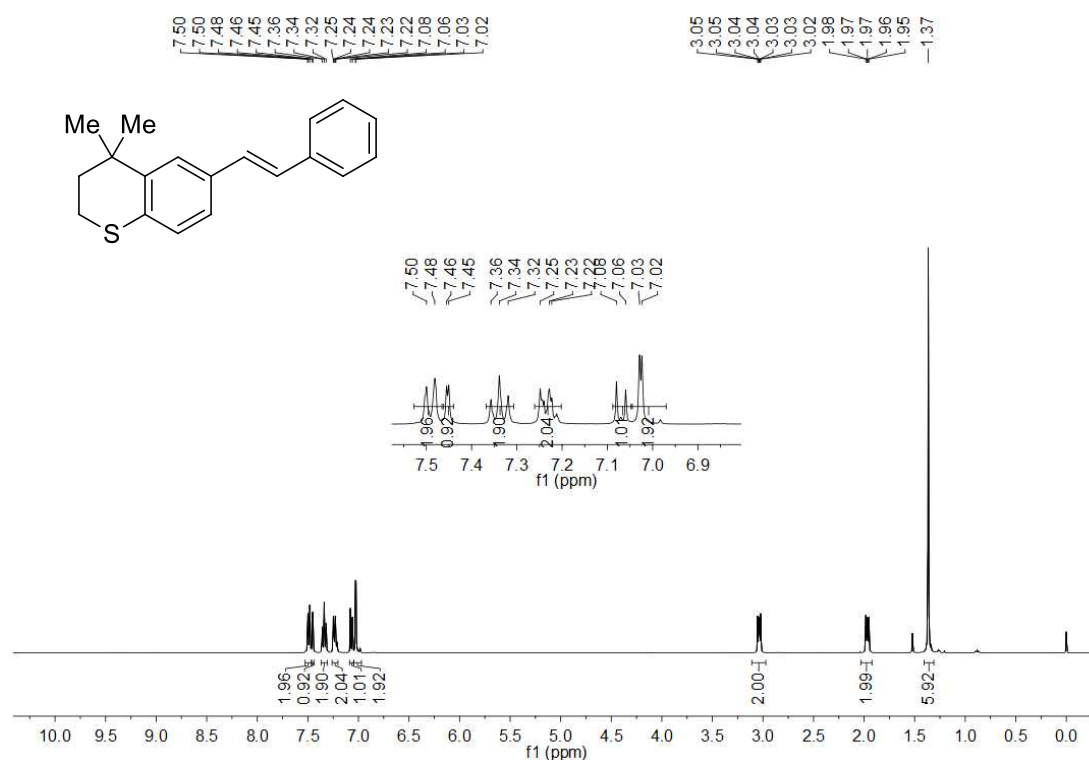

**Supplementary Figure S59.** <sup>1</sup>H NMR spectrum for compound *E*-3r (400 MHz, CDCl<sub>3</sub>, 25 °C).

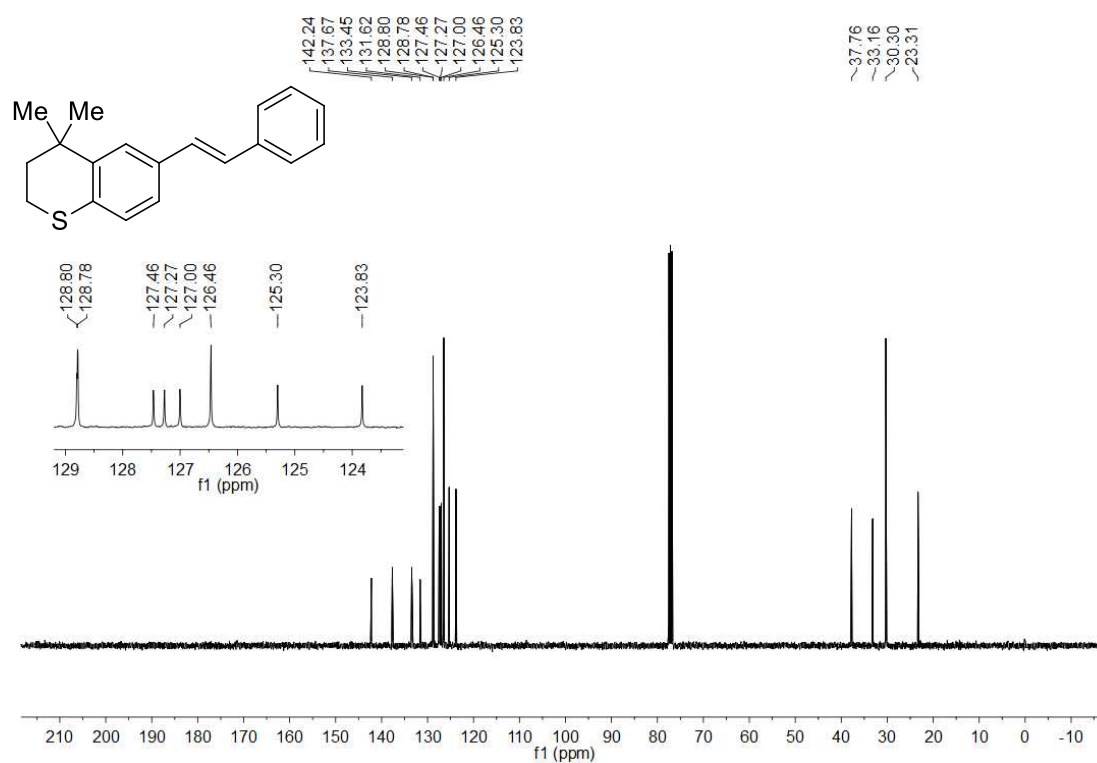

**Supplementary Figure S60.** <sup>13</sup>C NMR spectrum for compound *E*-3r (100 MHz, CDCl<sub>3</sub>, 25 °C).

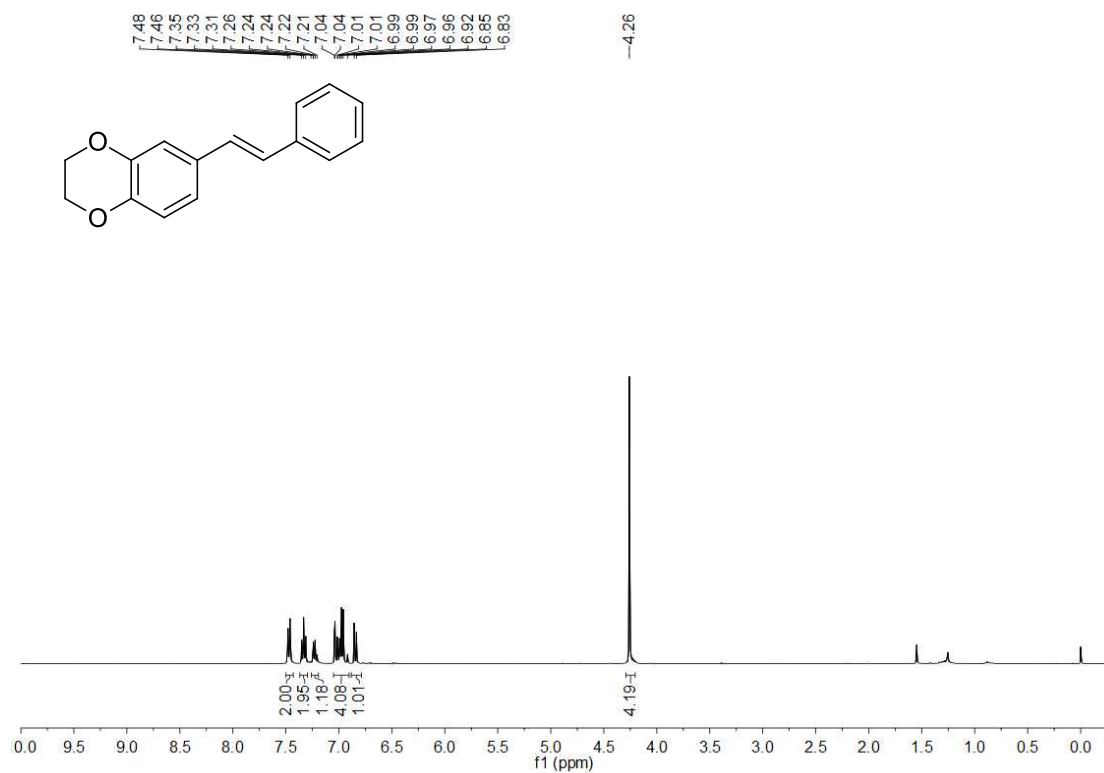

**Supplementary Figure S61.** <sup>1</sup>H NMR spectrum for compound *E*-3s (400 MHz, CDCl<sub>3</sub>, 25 °C).

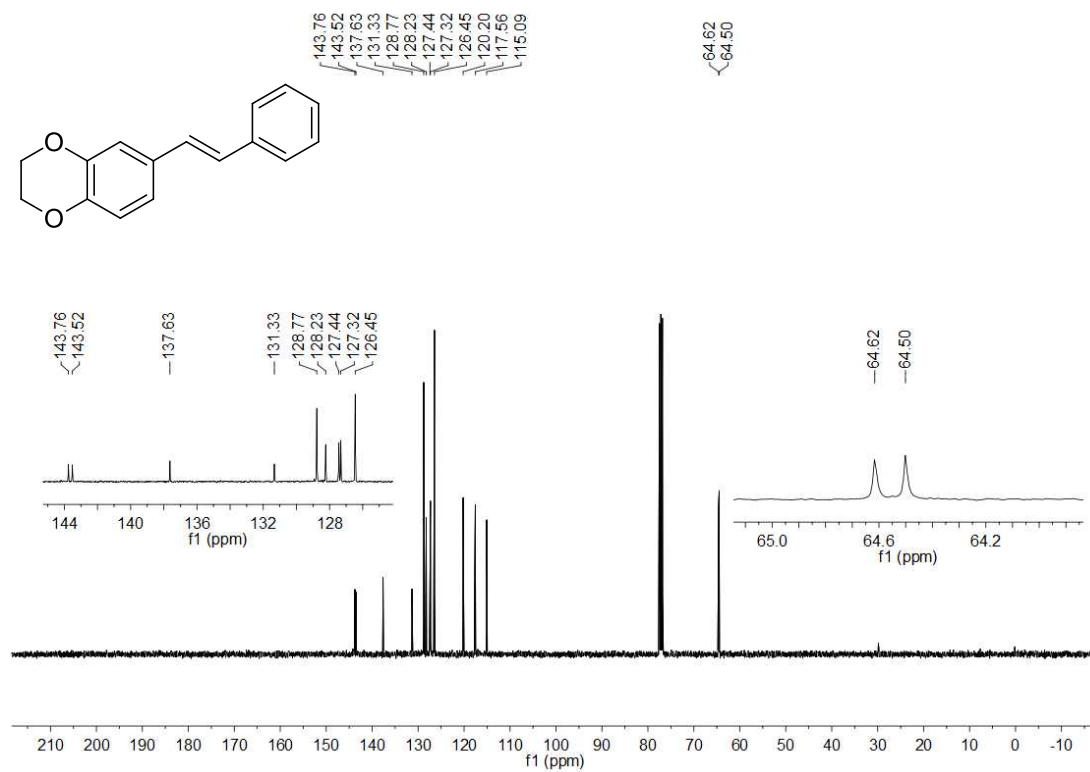

**Supplementary Figure S62.** <sup>13</sup>C NMR spectrum for compound *E*-3s (100 MHz, CDCl<sub>3</sub>, 25 °C).

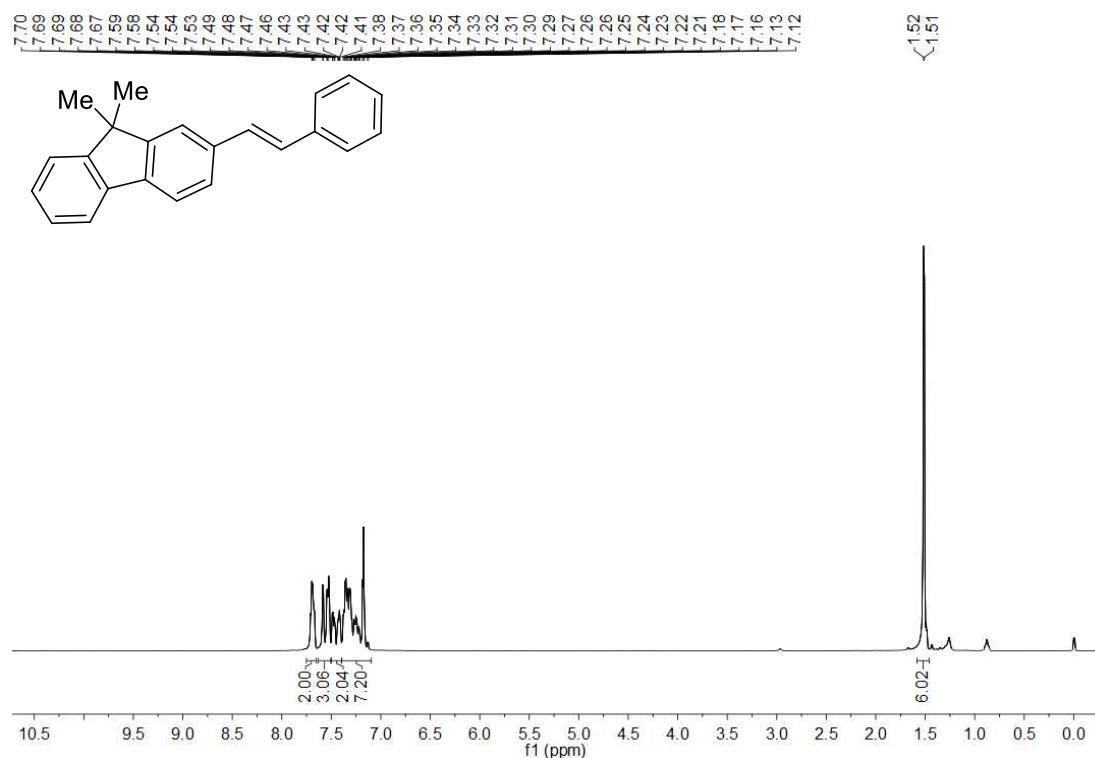

**Supplementary Figure S63.** <sup>1</sup>H NMR spectrum for compound *E*-3t (400 MHz, CDCl<sub>3</sub>, 25 °C).

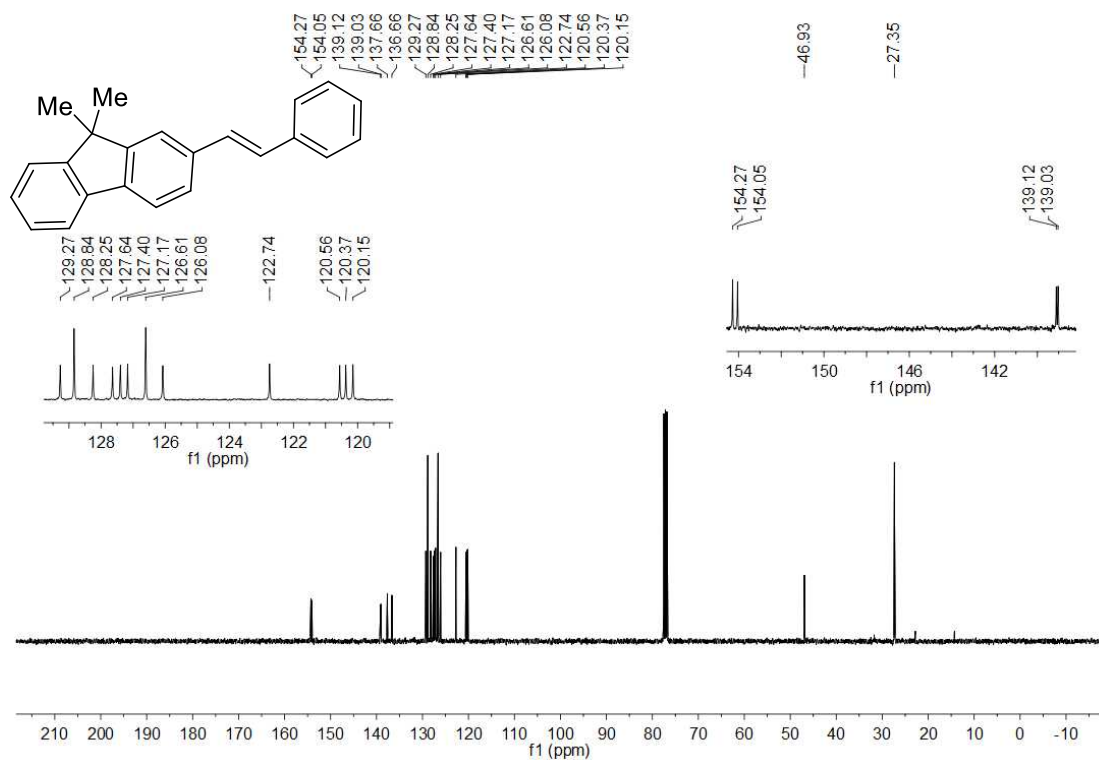

**Supplementary Figure S64.** <sup>13</sup>C NMR spectrum for compound *E*-3t (100 MHz, CDCl<sub>3</sub>, 25 °C).

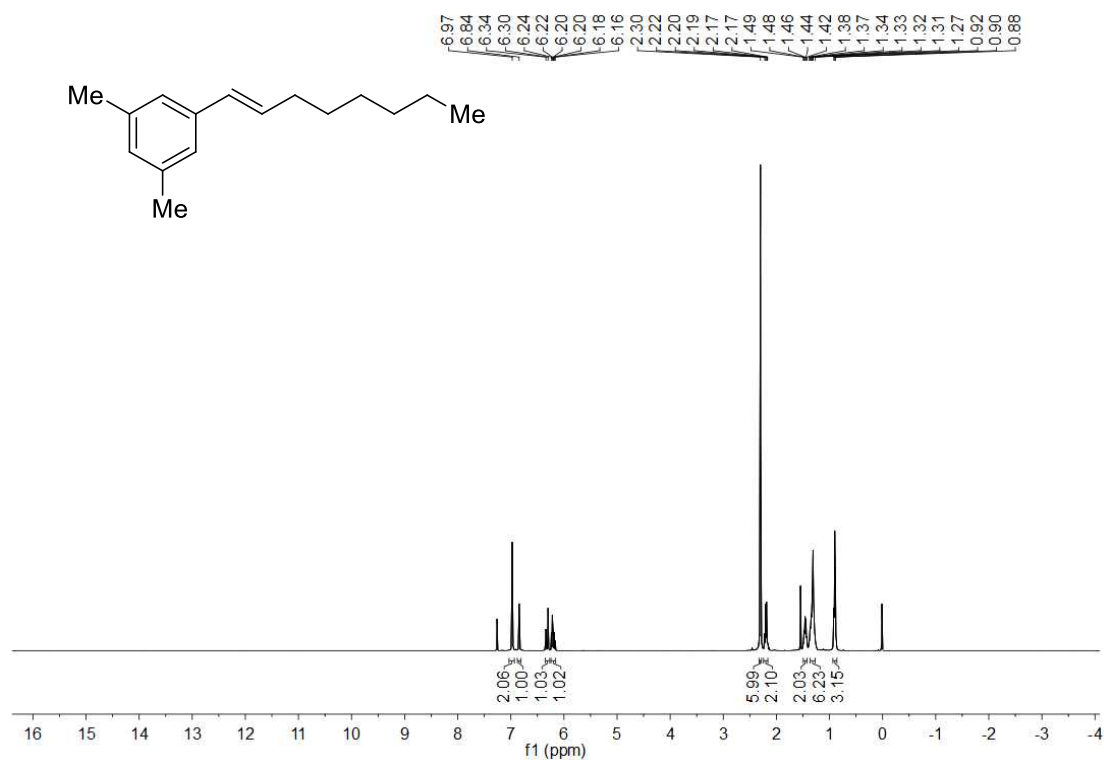

Supplementary Figure S65. <sup>1</sup>H NMR spectrum for compound *E*-3u (400 MHz, CDCl<sub>3</sub>, 25 °C).

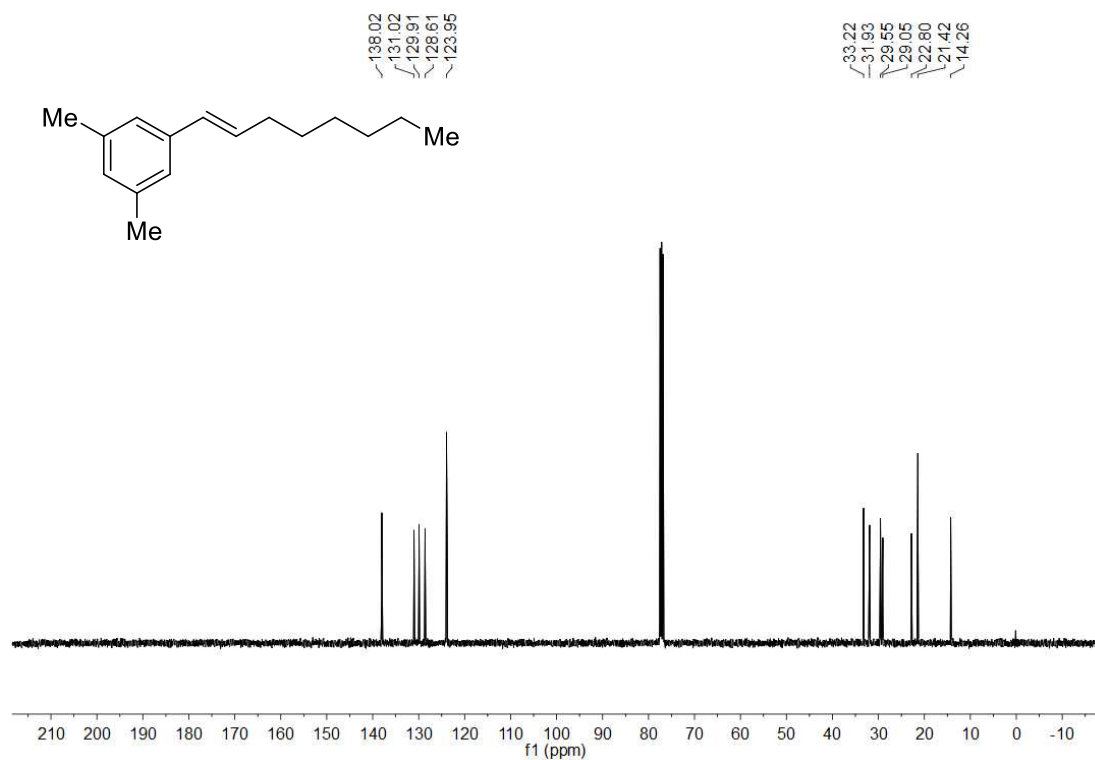

Supplementary Figure S66. <sup>13</sup>C NMR spectrum for compound *E*-3u (100 MHz, CDCl<sub>3</sub>, 25 °C).

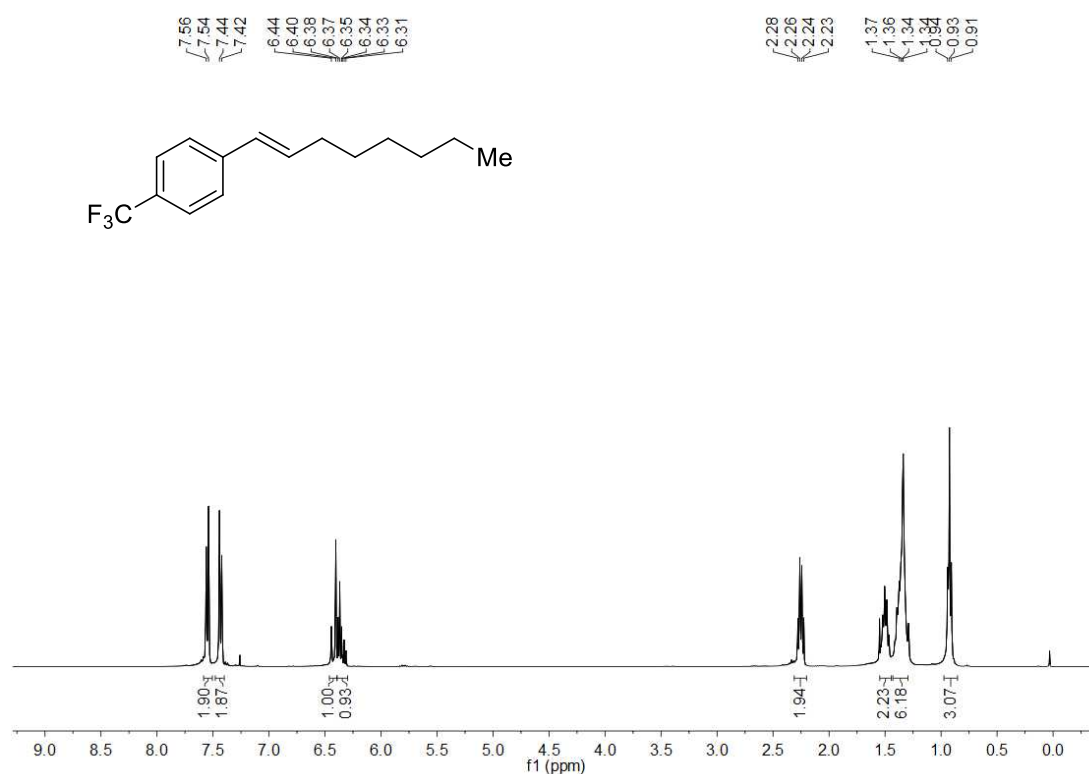

**Supplementary Figure S67.** <sup>1</sup>H NMR spectrum for compound *E*-3v (400 MHz, CDCl<sub>3</sub>, 25 °C).

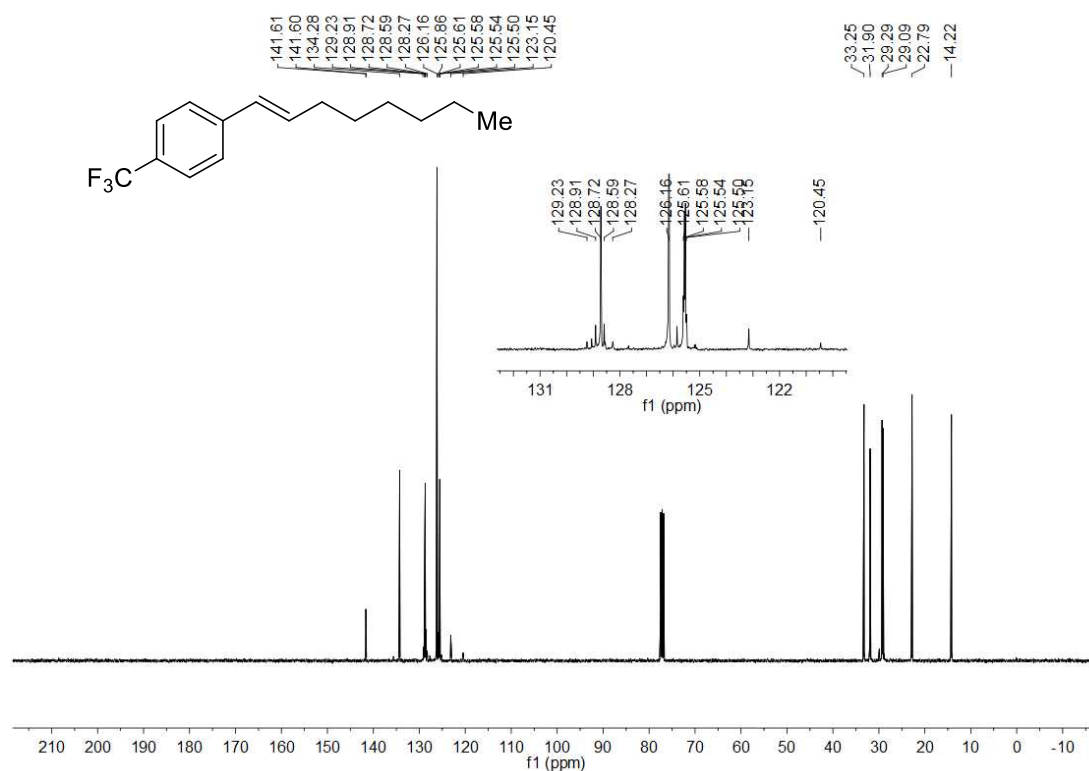

**Supplementary Figure S68.** <sup>13</sup>C NMR spectrum for compound *E*-3v (100 MHz, CDCl<sub>3</sub>, 25 °C).

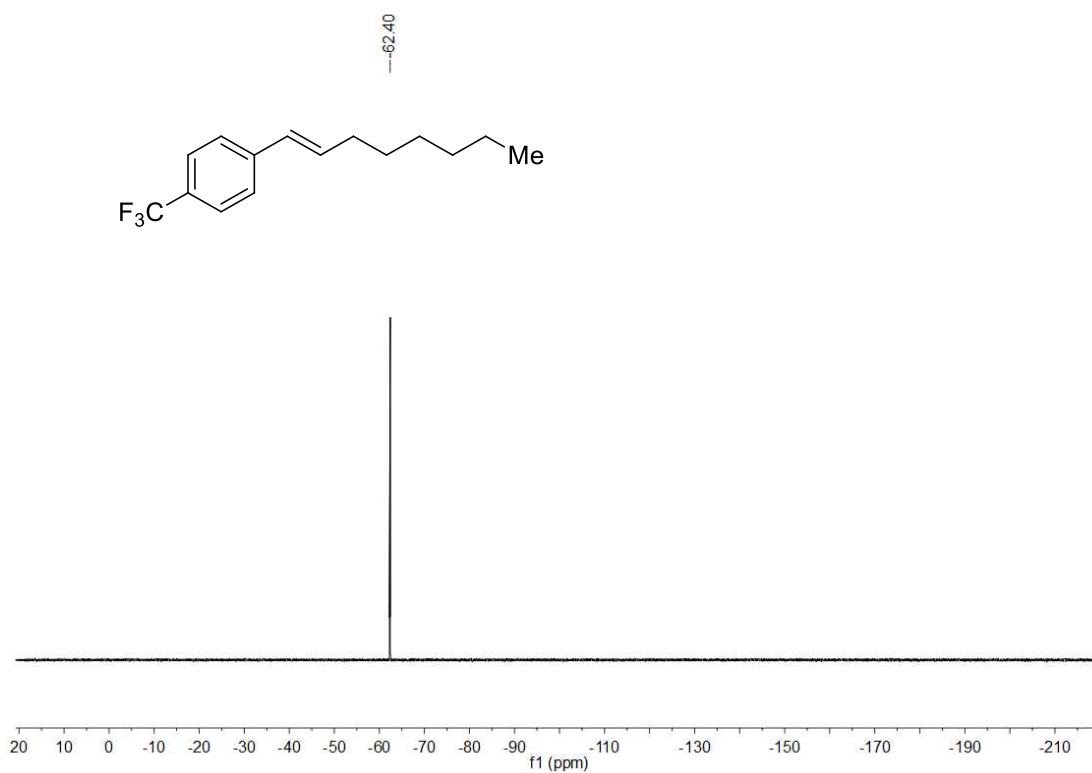

**Supplementary Figure S69.**  $^{19}\text{F}$  NMR spectrum for compound *E*-3v (376 MHz,  $\text{CDCl}_3$ , 25 °C).

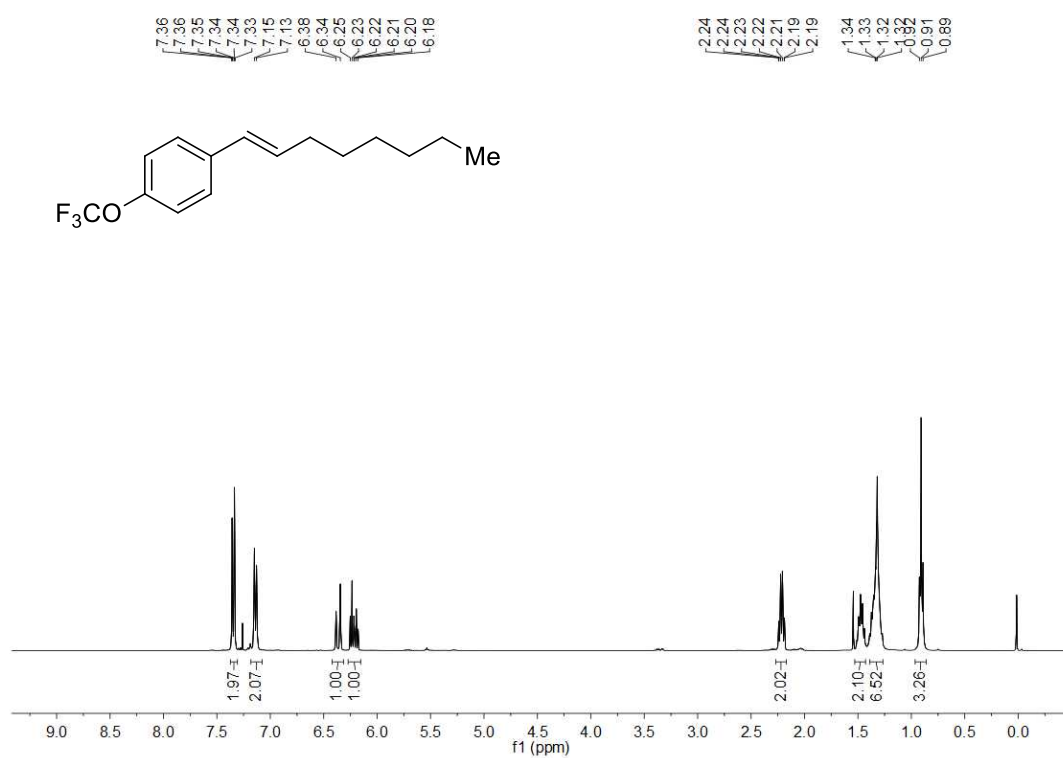

**Supplementary Figure S70.**  $^1\text{H}$  NMR spectrum for compound *E*-3w (400 MHz,  $\text{CDCl}_3$ , 25 °C).



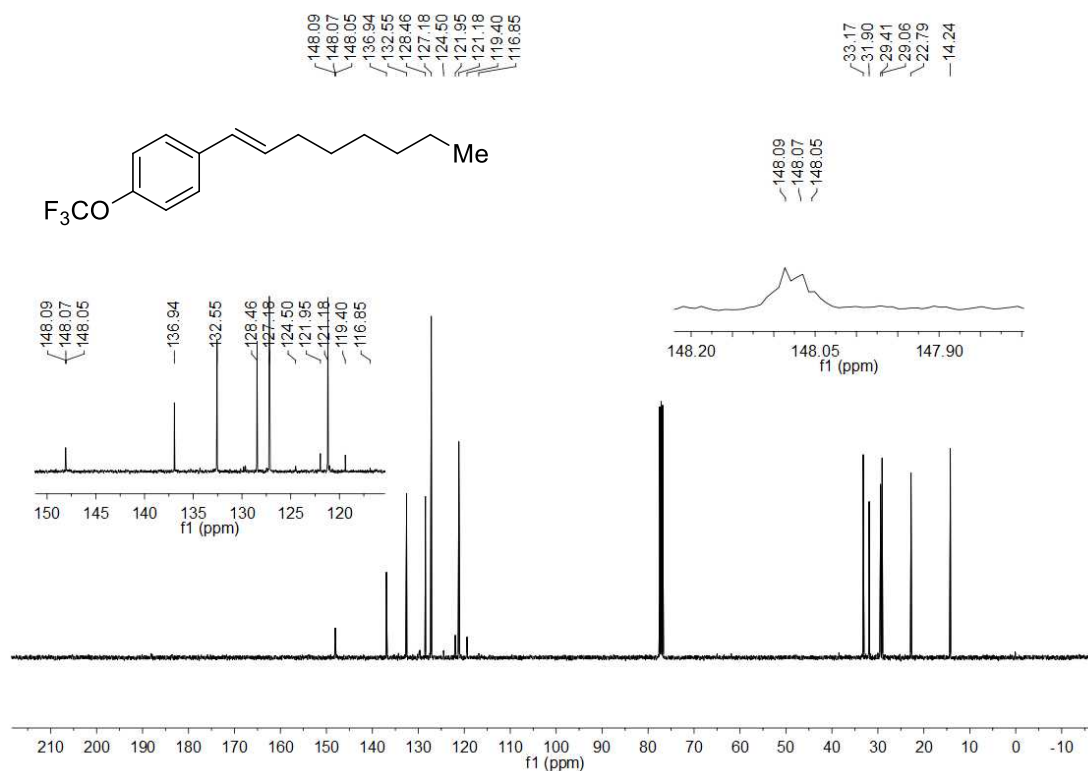

**Supplementary Figure S71.** <sup>13</sup>C NMR spectrum for compound *E*-3w (100 MHz, CDCl<sub>3</sub>, 25 °C).

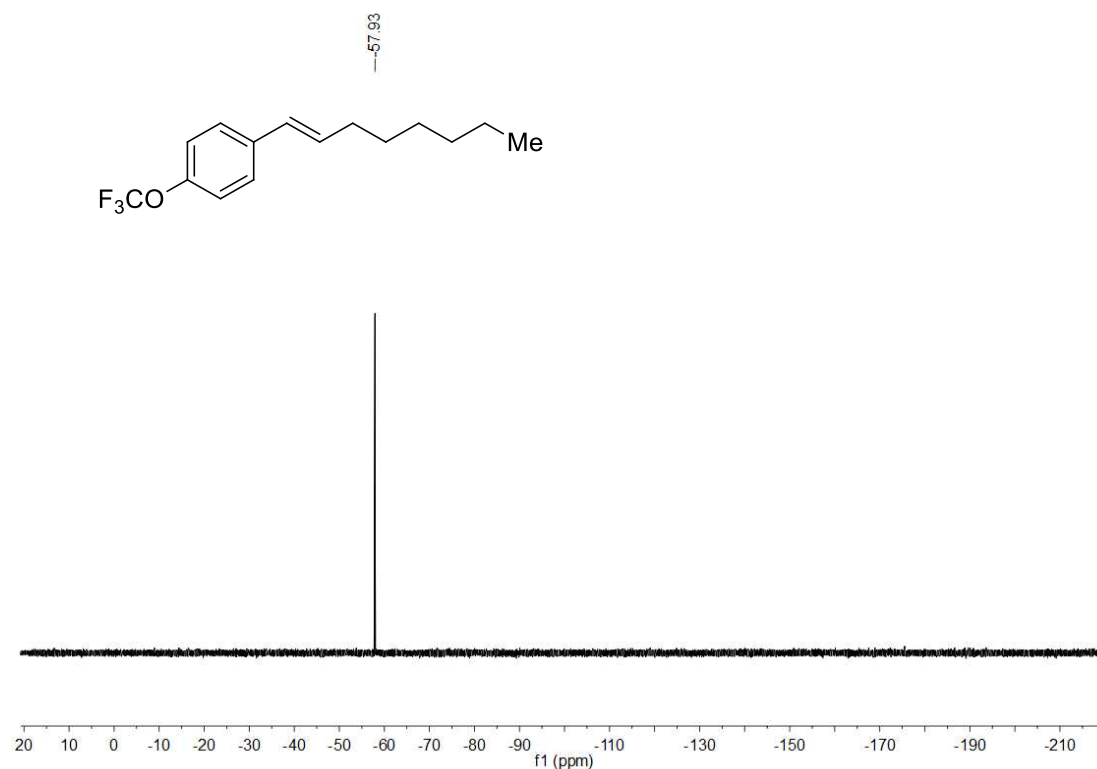

**Supplementary Figure S72.** <sup>19</sup>F NMR spectrum for compound *E*-3w (376 MHz, CDCl<sub>3</sub>, 25 °C).

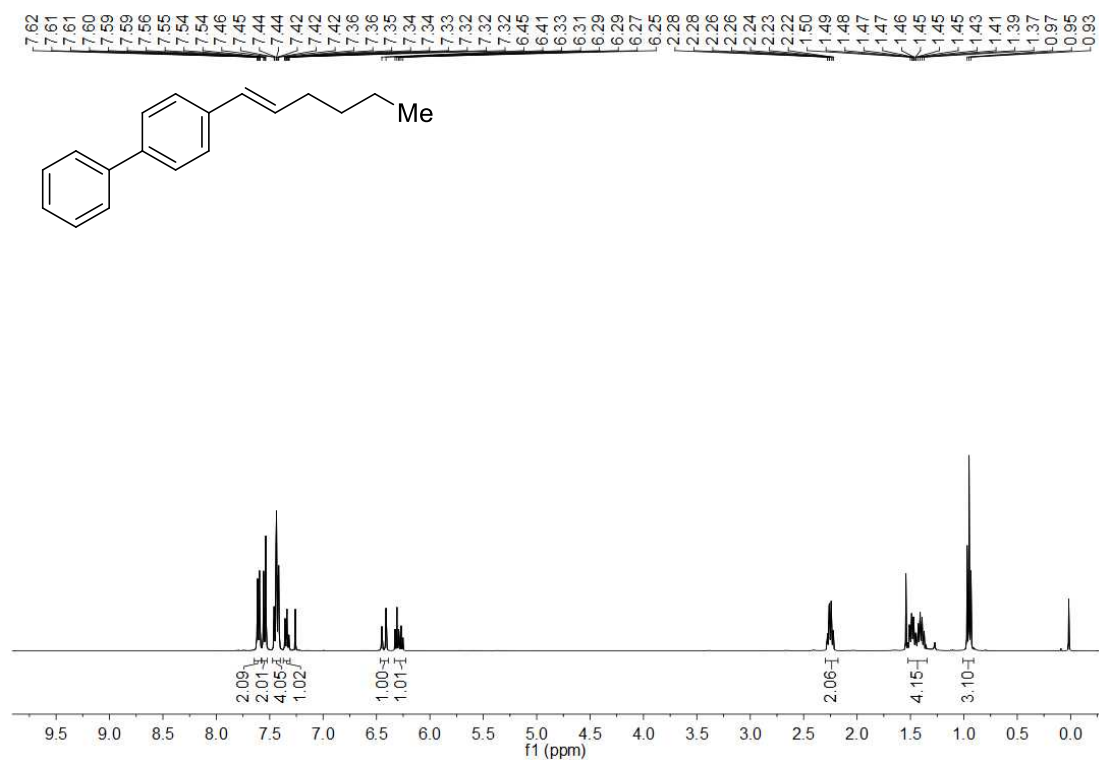

**Supplementary Figure S73.** <sup>1</sup>H NMR spectrum for compound *E*-3x (400 MHz, CDCl<sub>3</sub>, 25 °C).

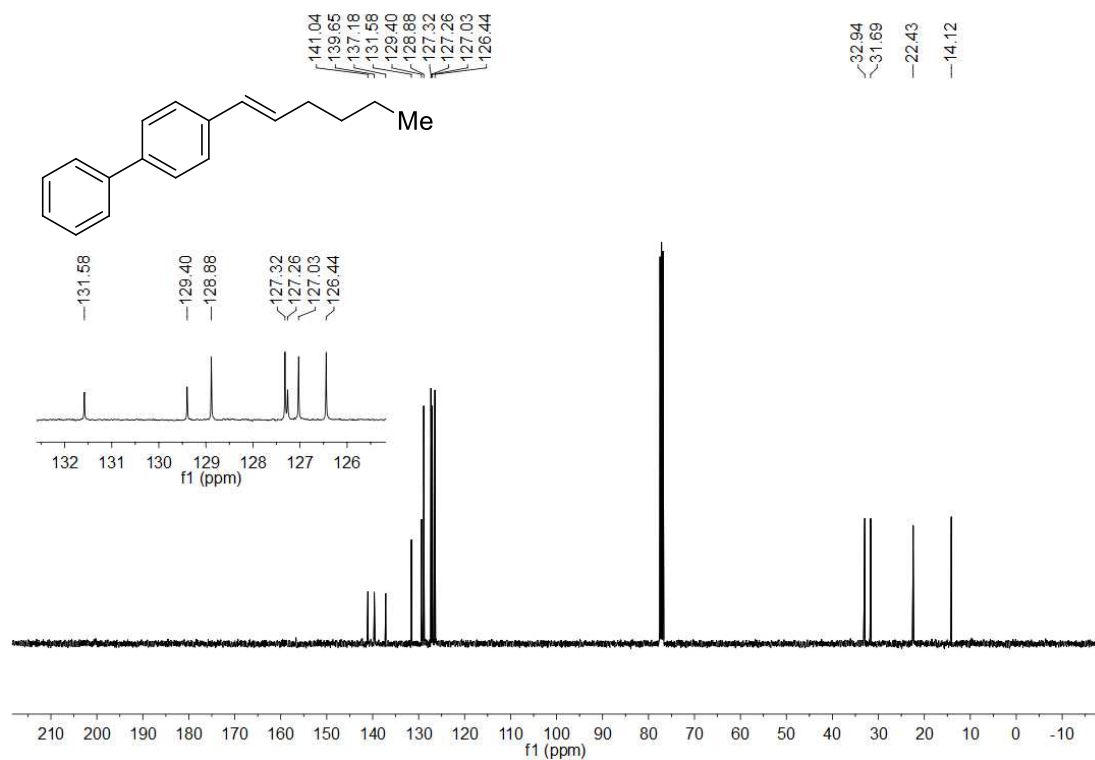

**Supplementary Figure S74.** <sup>13</sup>C NMR spectrum for compound *E*-3x (100 MHz, CDCl<sub>3</sub>, 25 °C).



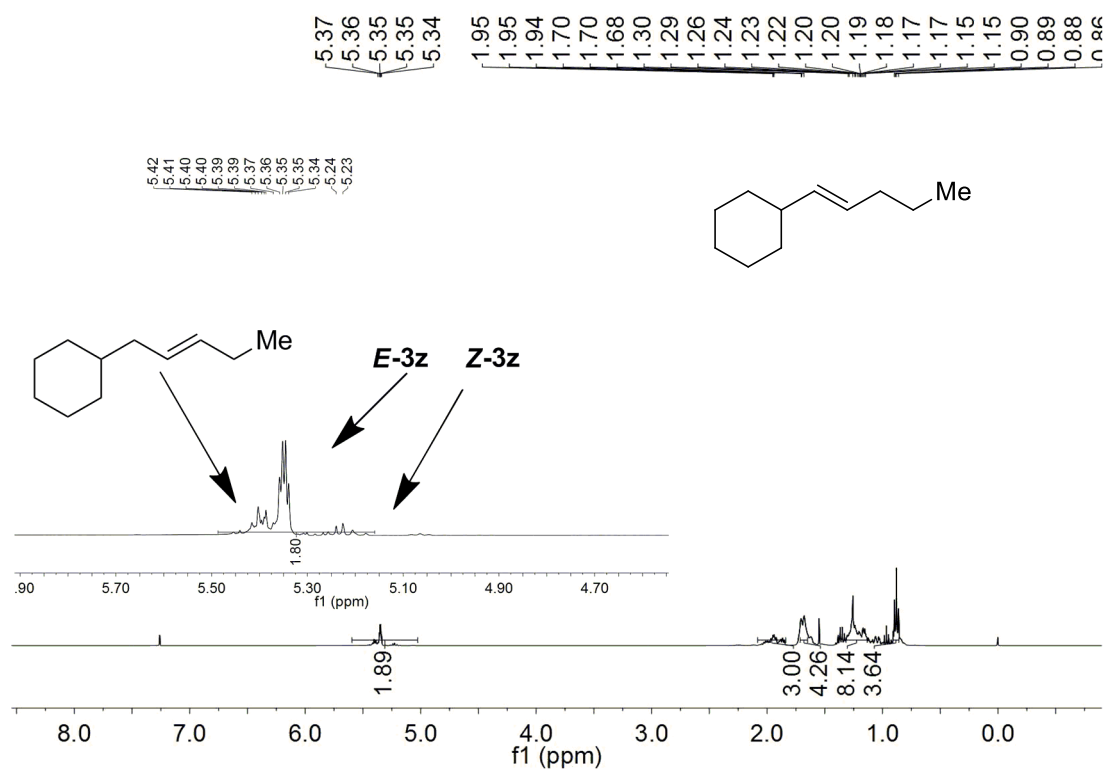

Supplementary Figure S77. <sup>1</sup>H NMR spectrum for compound *E*-3z (400 MHz, CDCl<sub>3</sub>, 25 °C).

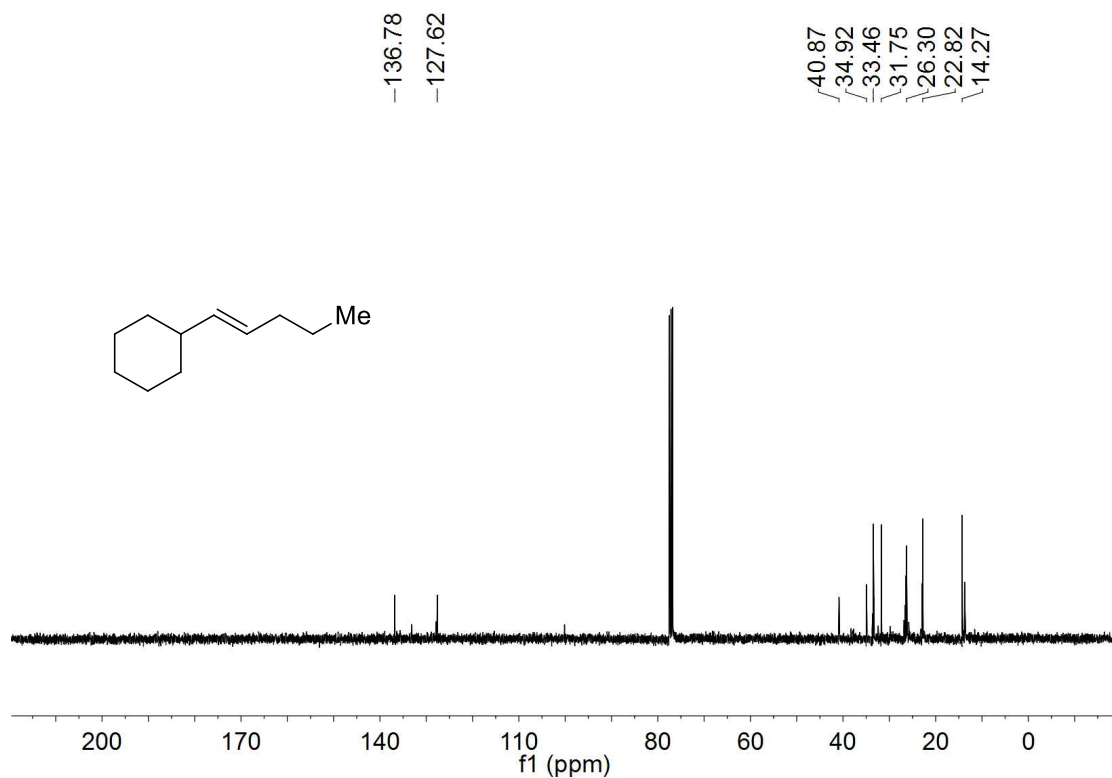

Supplementary Figure S78. <sup>13</sup>C NMR spectrum for compound *E*-3z (100 MHz, CDCl<sub>3</sub>, 25 °C).

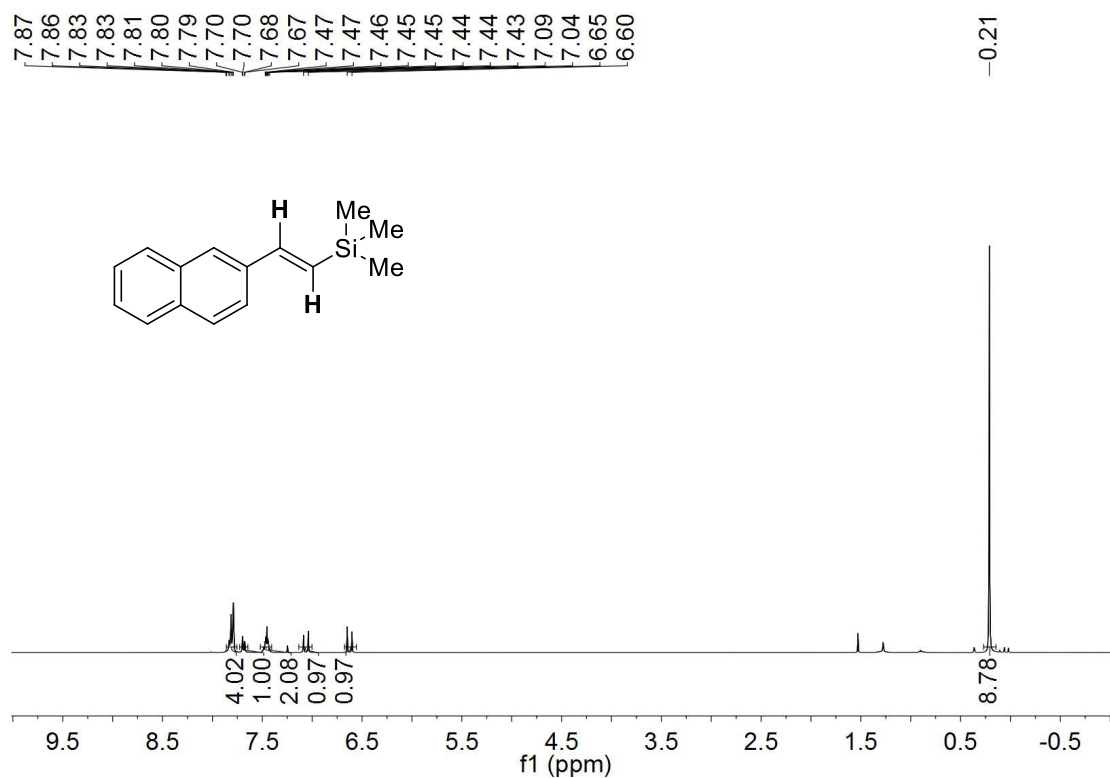

**Supplementary Figure S79.** <sup>1</sup>H NMR spectrum for compound *E*-3aa (400 MHz, CDCl<sub>3</sub>, 25 °C).

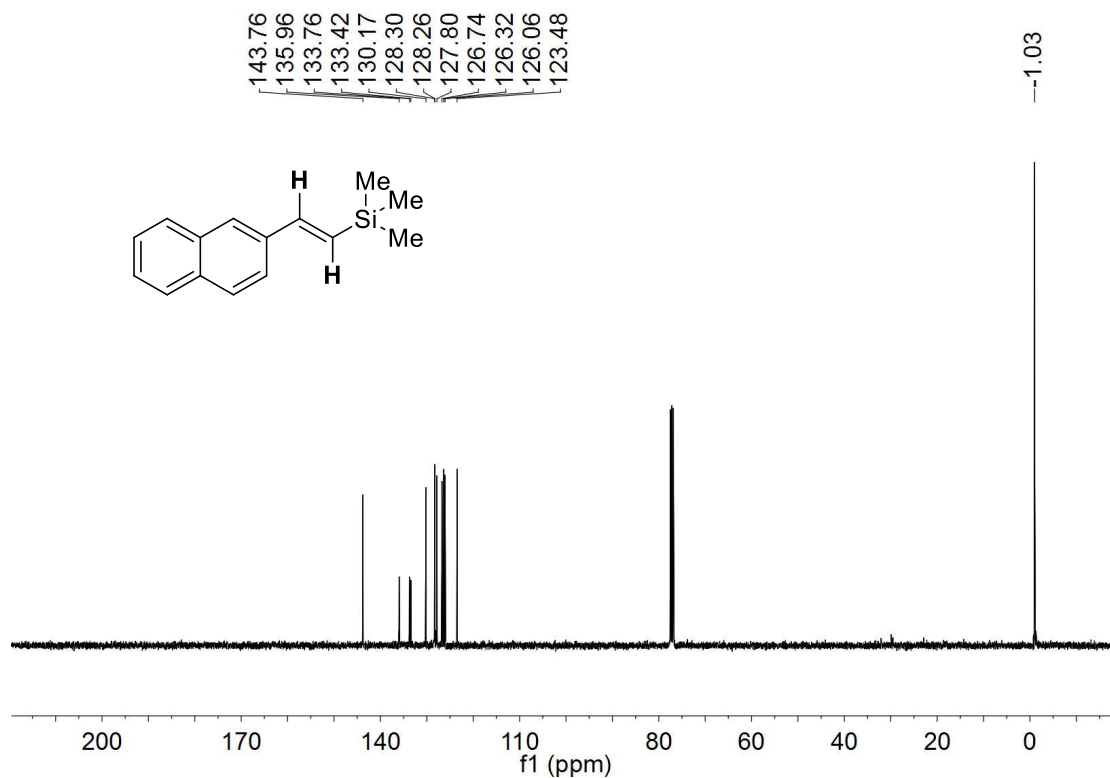

**Supplementary Figure S80.** <sup>13</sup>C NMR spectrum for compound *E*-3aa (100 MHz, CDCl<sub>3</sub>, 25 °C).

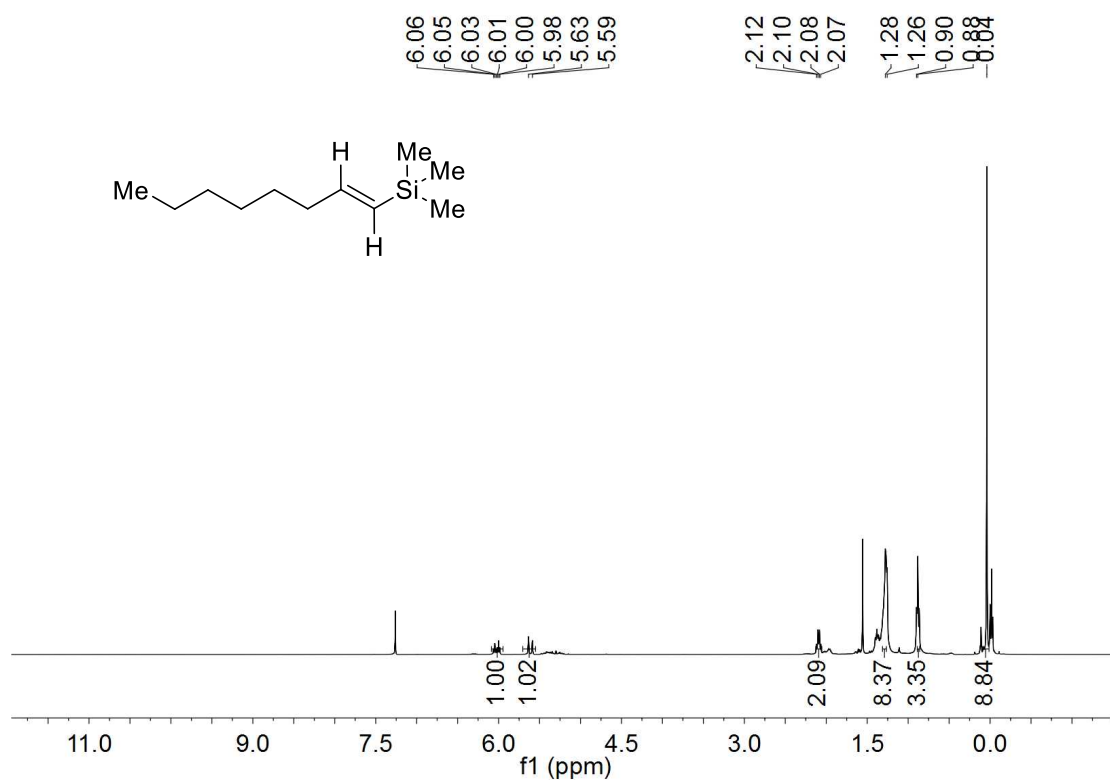

**Supplementary Figure S81.** <sup>1</sup>H NMR spectrum for compound *E*-3ab (400 MHz, CDCl<sub>3</sub>, 25 °C).

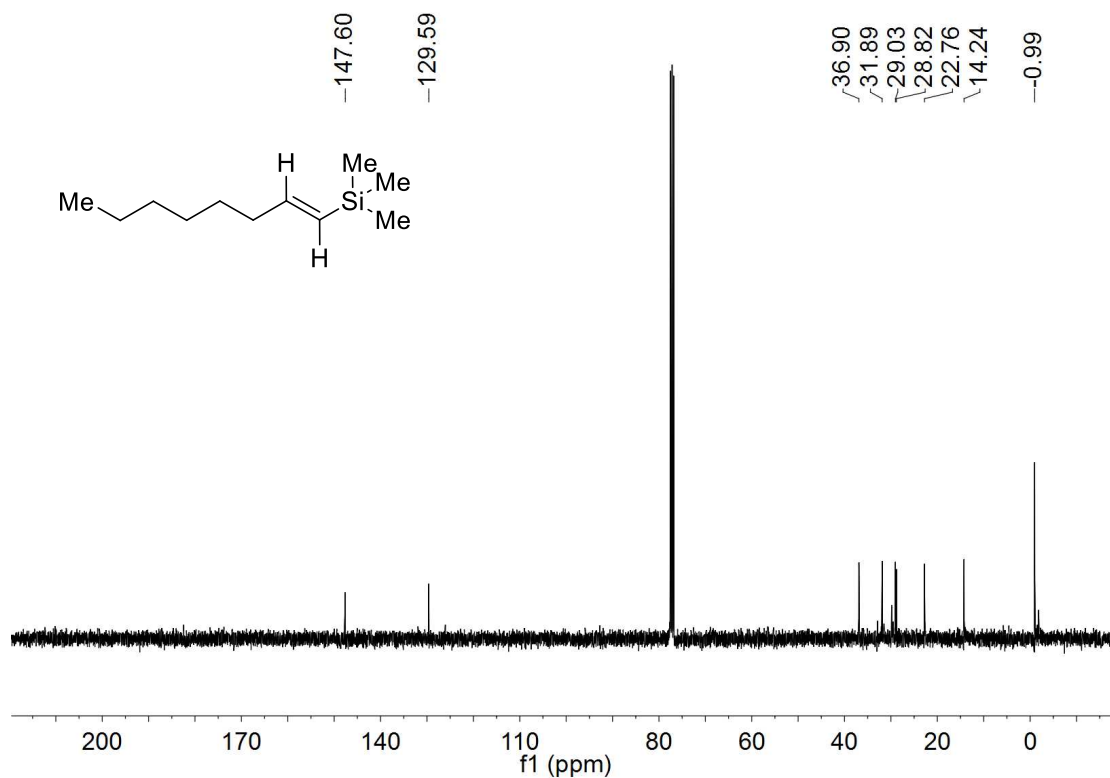

**Supplementary Figure S82.** <sup>13</sup>C NMR spectrum for compound *E*-3ab (100 MHz, CDCl<sub>3</sub>, 25 °C).

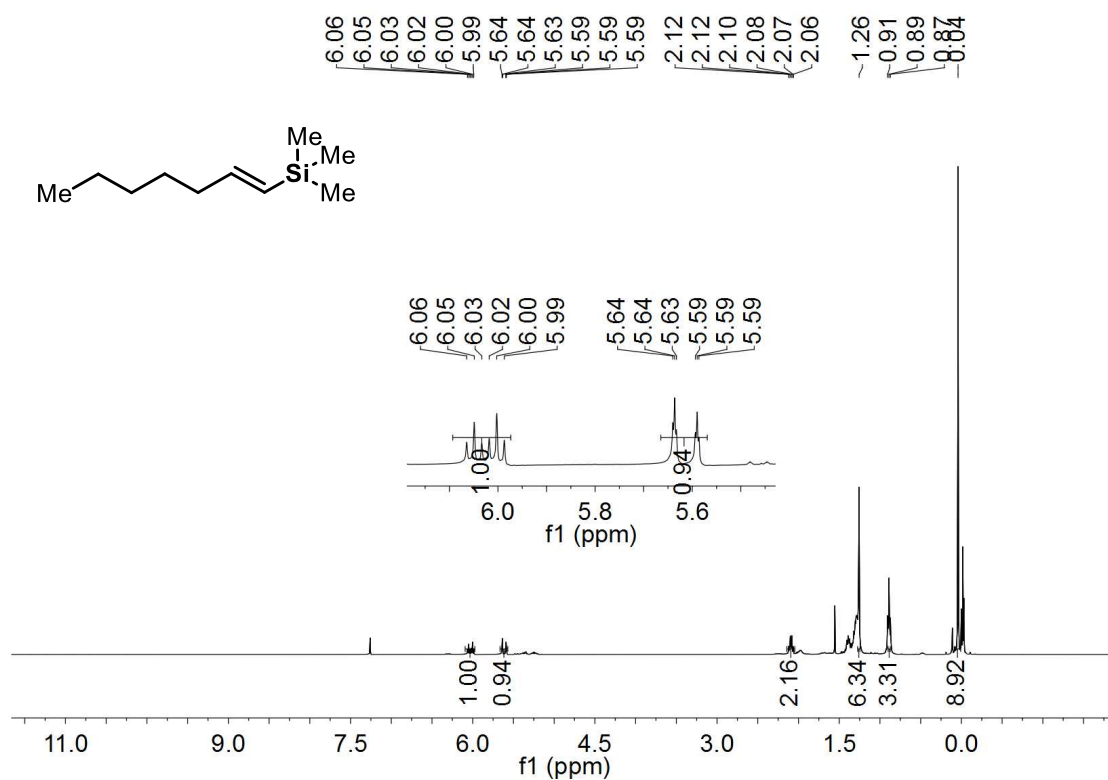

Supplementary Figure S83. <sup>1</sup>H NMR spectrum for compound *E*-3ac (400 MHz, CDCl<sub>3</sub>, 25 °C).

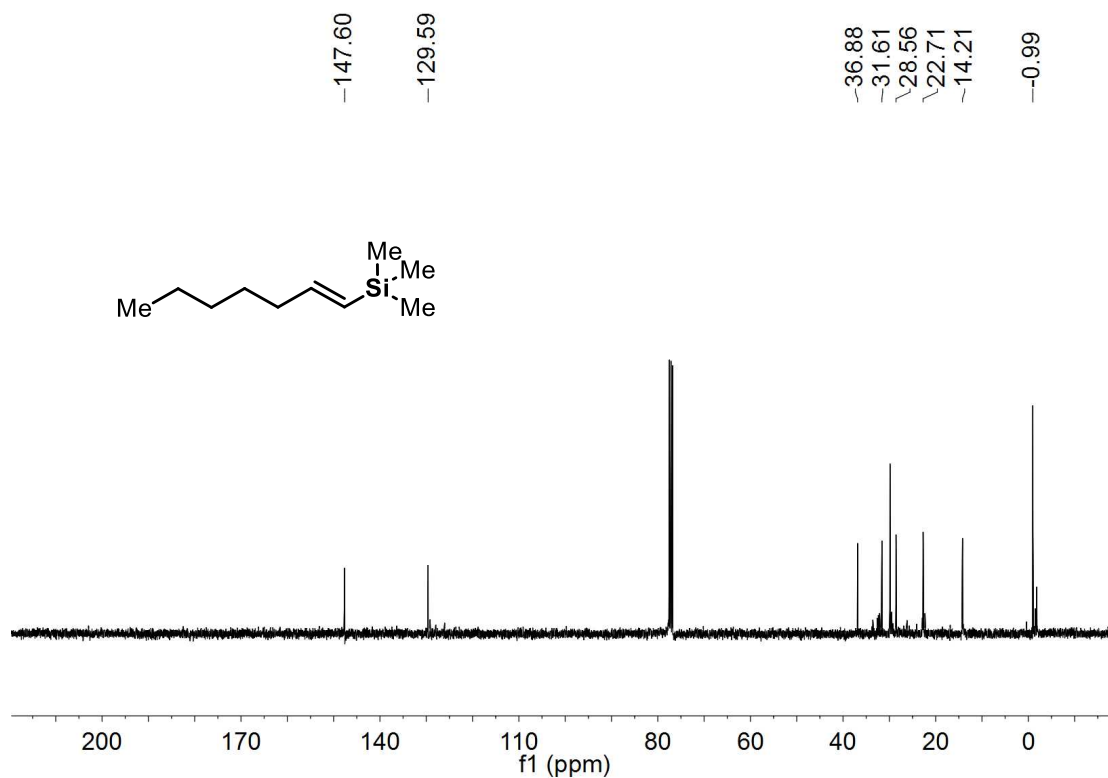

Supplementary Figure S84. <sup>13</sup>C NMR spectrum for compound *E*-3ac (100 MHz, CDCl<sub>3</sub>, 25 °C).

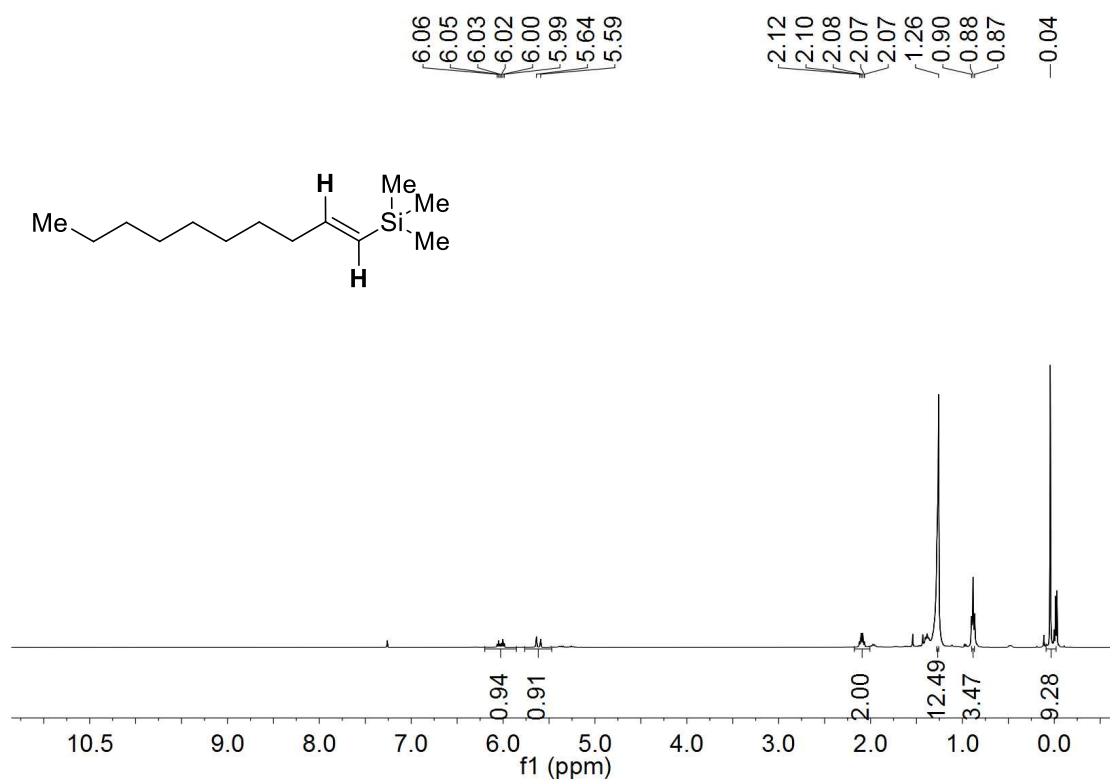

**Supplementary Figure S85.** <sup>1</sup>H NMR spectrum for compound *E*-3ad (400 MHz, CDCl<sub>3</sub>, 25 °C).

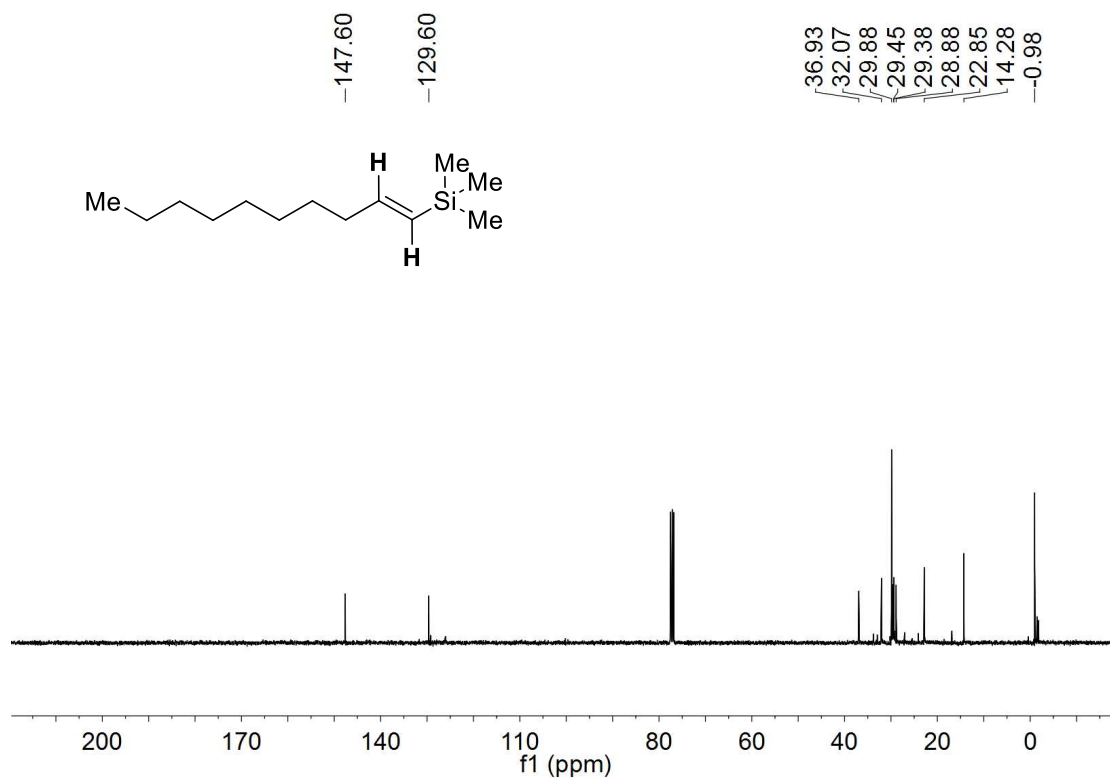

**Supplementary Figure S86.** <sup>13</sup>C NMR spectrum for compound *E*-3ad (100 MHz, CDCl<sub>3</sub>, 25 °C).



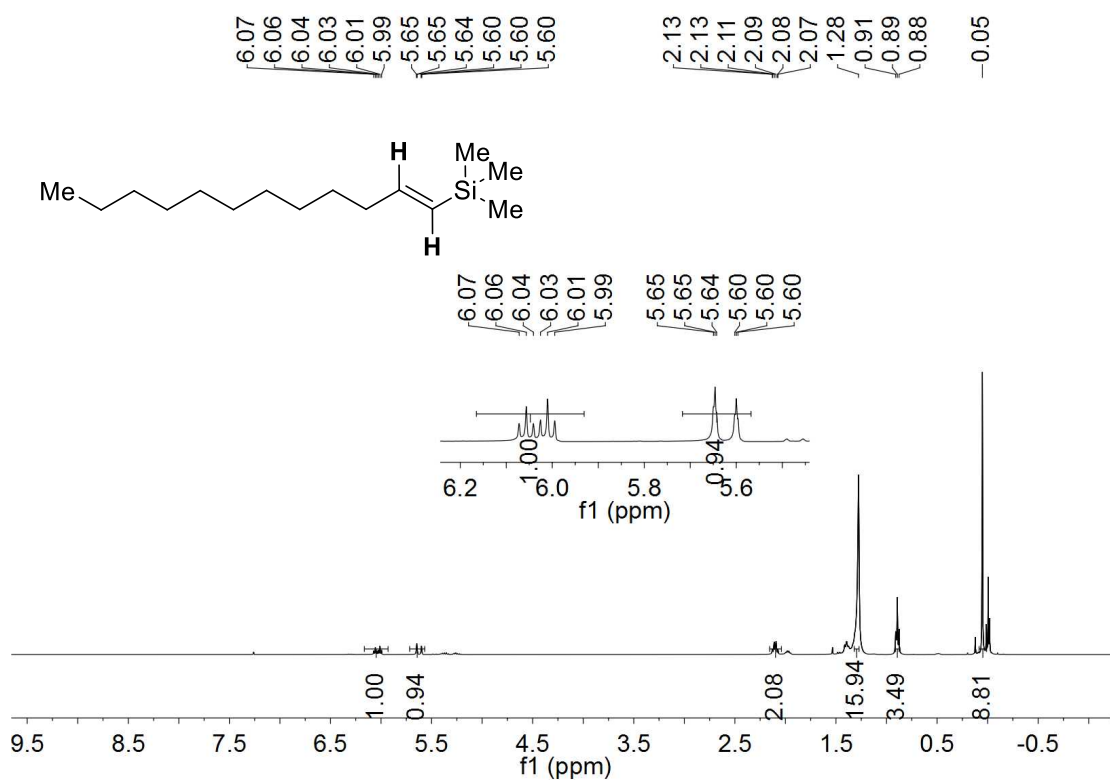

**Supplementary Figure S87.** <sup>1</sup>H NMR spectrum for compound *E*-3ae (400 MHz, CDCl<sub>3</sub>, 25 °C).

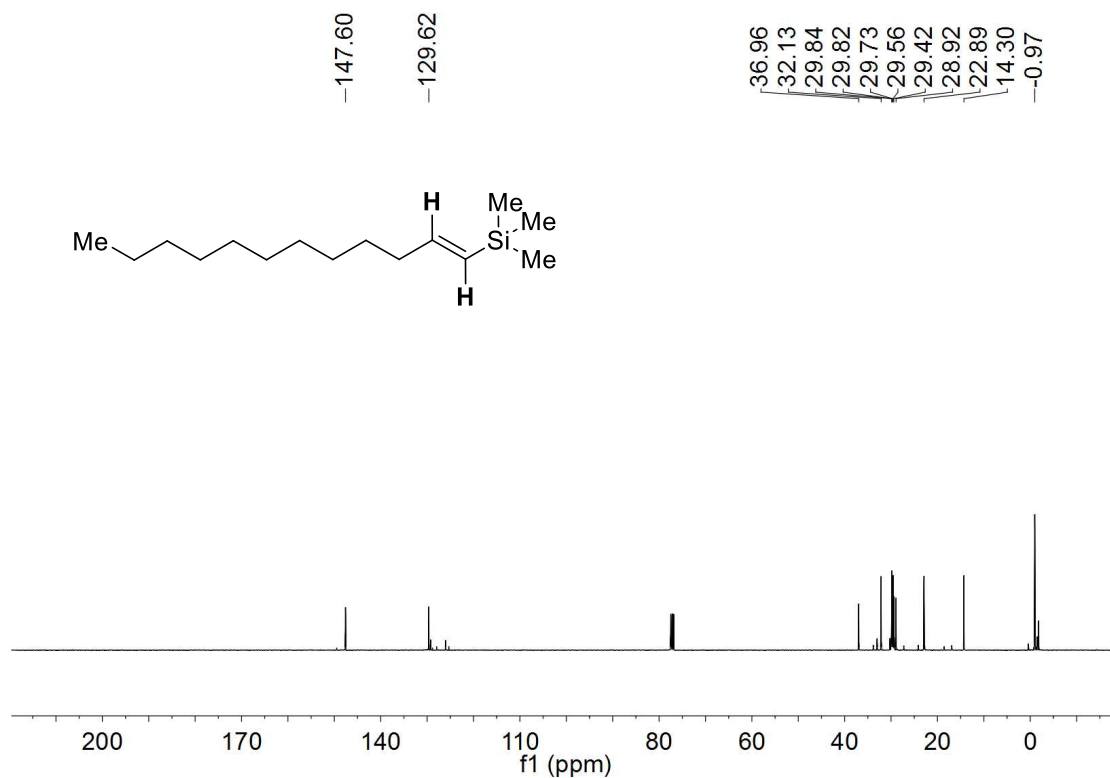

**Supplementary Figure S88.** <sup>13</sup>C NMR spectrum for compound *E*-3ae (100 MHz, CDCl<sub>3</sub>, 25 °C).

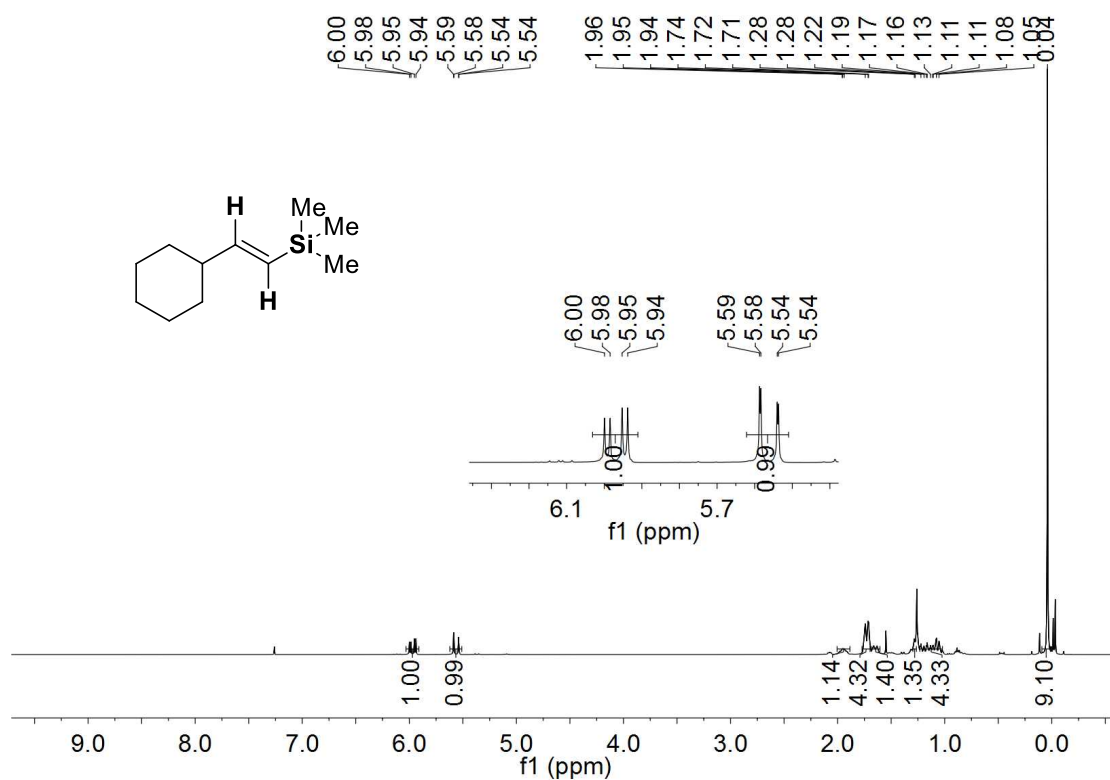

Supplementary Figure S89. <sup>1</sup>H NMR spectrum for compound *E*-3af (400 MHz, CDCl<sub>3</sub>, 25 °C).

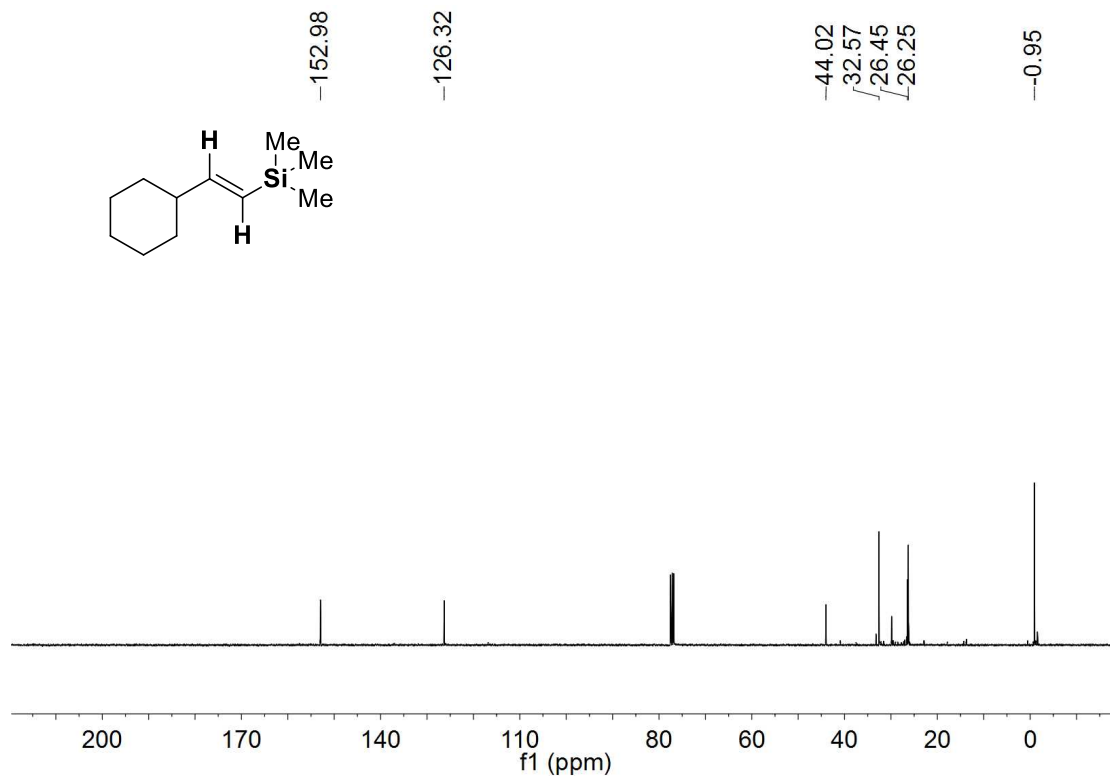

Supplementary Figure S90. <sup>13</sup>C NMR spectrum for compound *E*-3af (100 MHz, CDCl<sub>3</sub>, 25 °C).

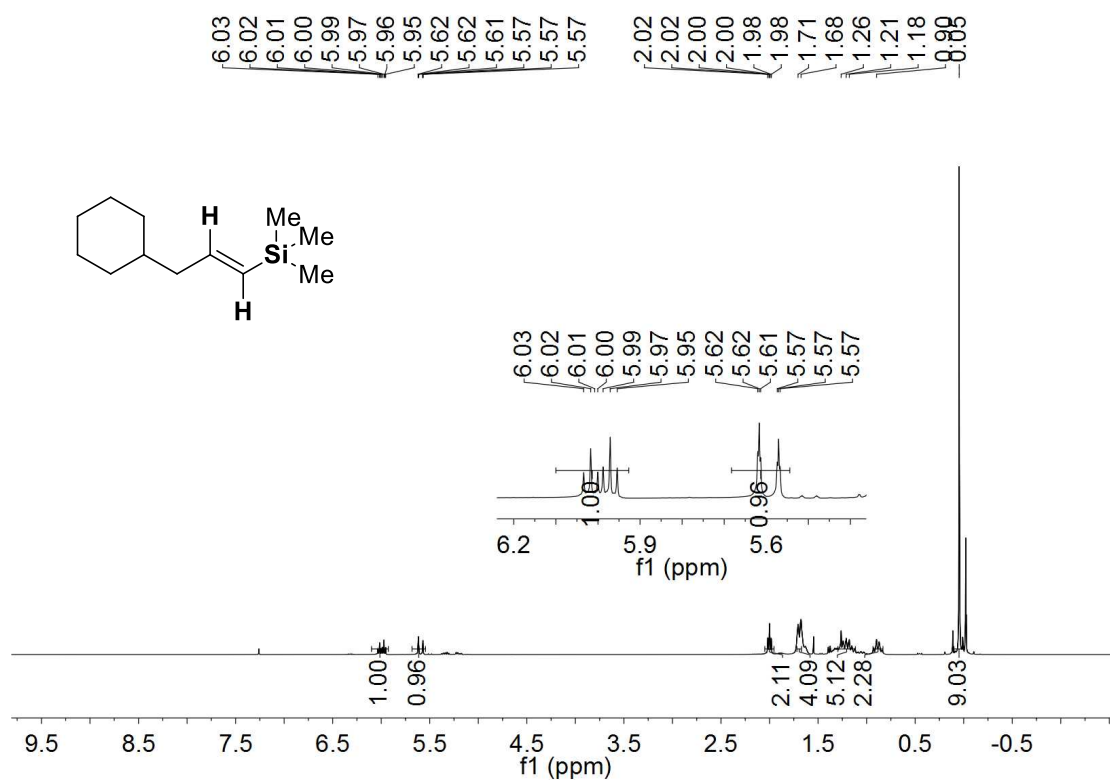

**Supplementary Figure S91.** <sup>1</sup>H NMR spectrum for compound *E*-3ag (400 MHz, CDCl<sub>3</sub>, 25 °C).

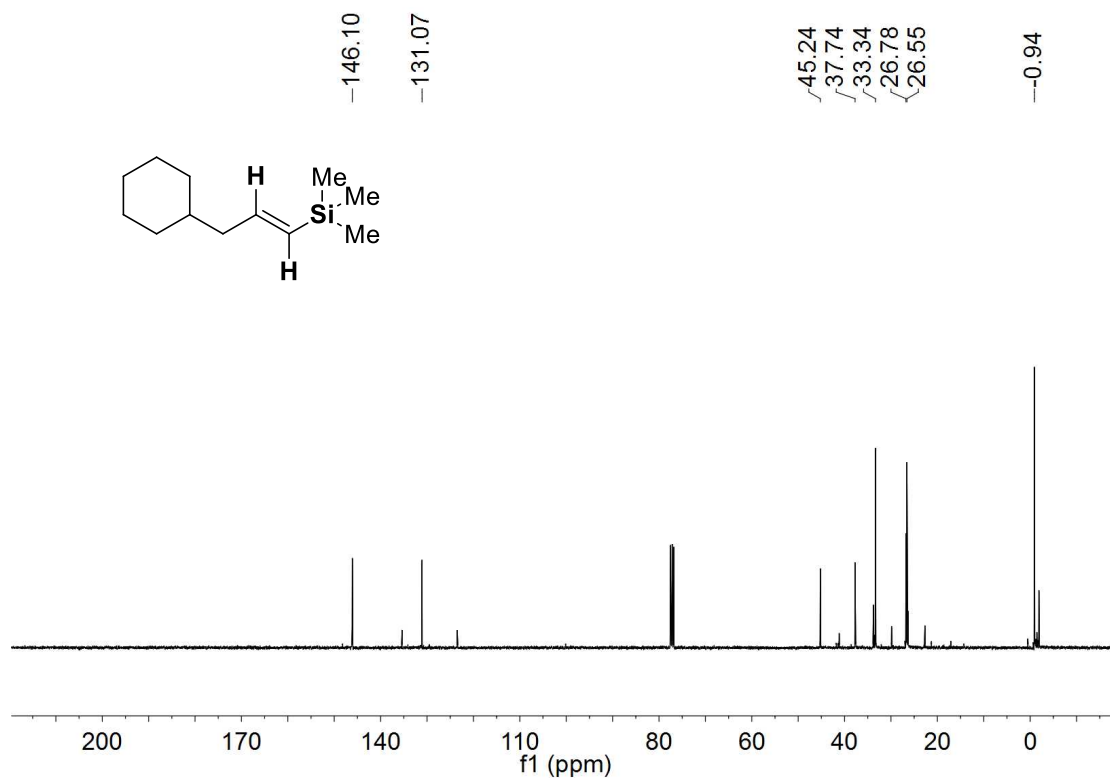

**Supplementary Figure S92.** <sup>13</sup>C NMR spectrum for compound *E*-3ag (100 MHz, CDCl<sub>3</sub>, 25 °C).

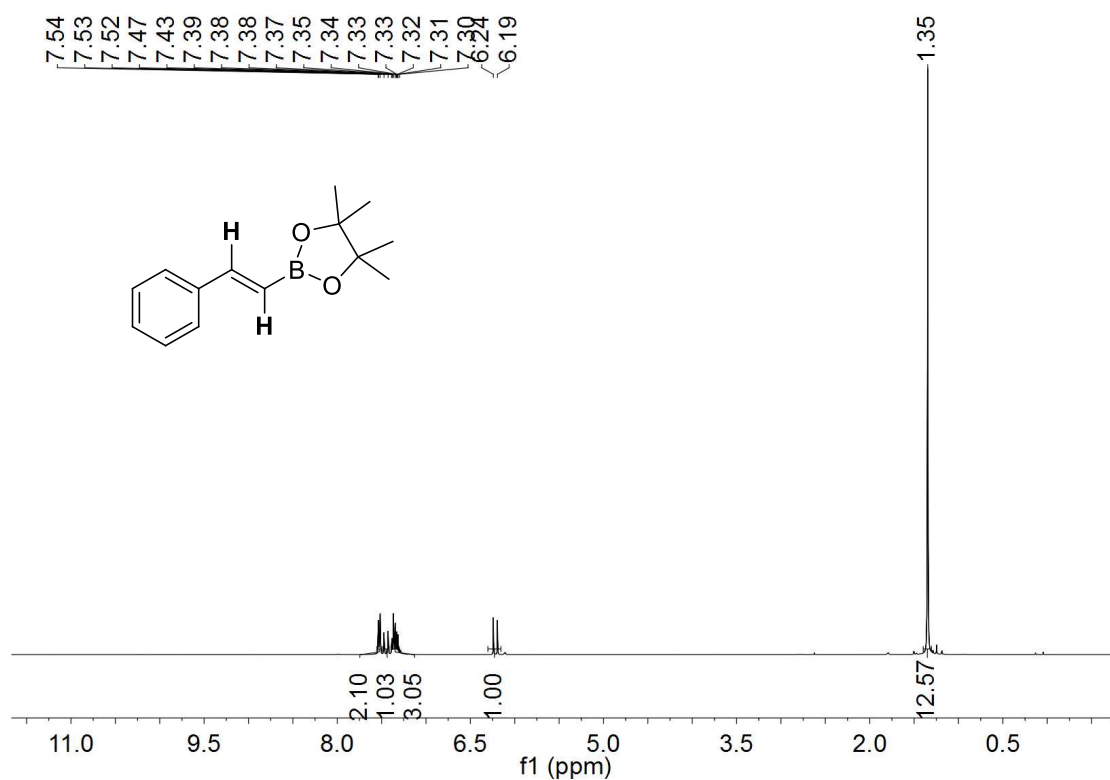

**Supplementary Figure S93.** <sup>1</sup>H NMR spectrum for compound *E*-3ah (400 MHz, CDCl<sub>3</sub>, 25 °C).

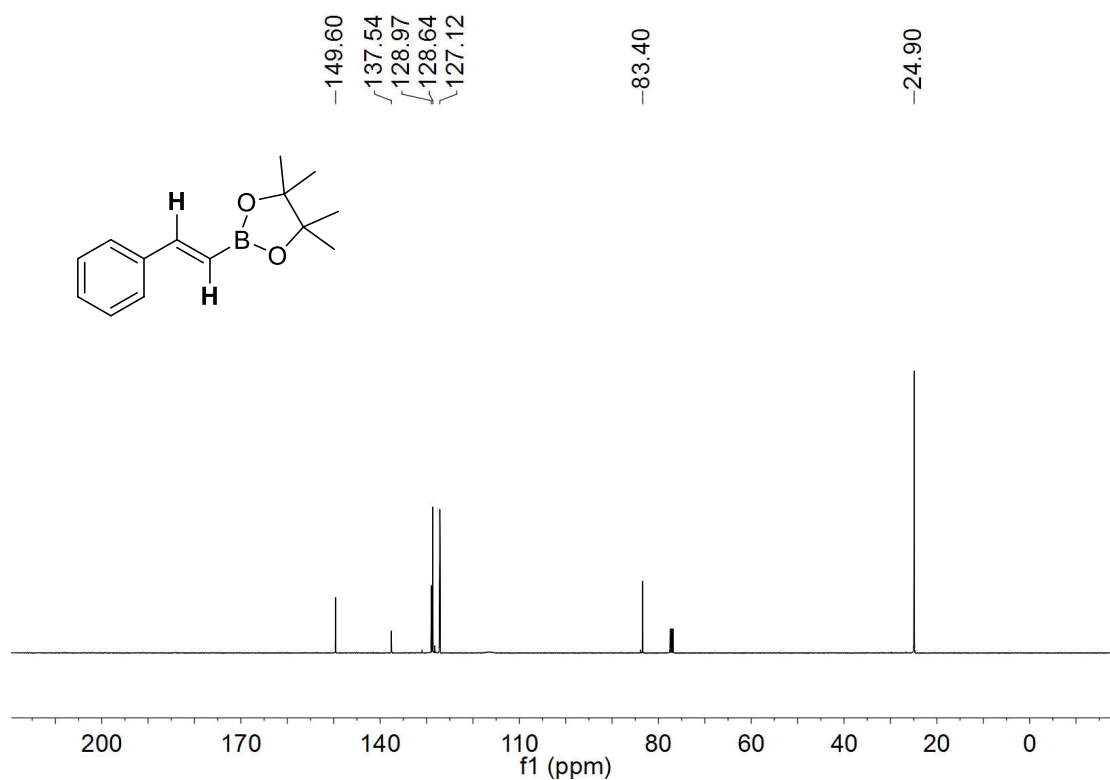

**Supplementary Figure S94.** <sup>13</sup>C NMR spectrum for compound *E*-3ah (100 MHz, CDCl<sub>3</sub>, 25 °C).

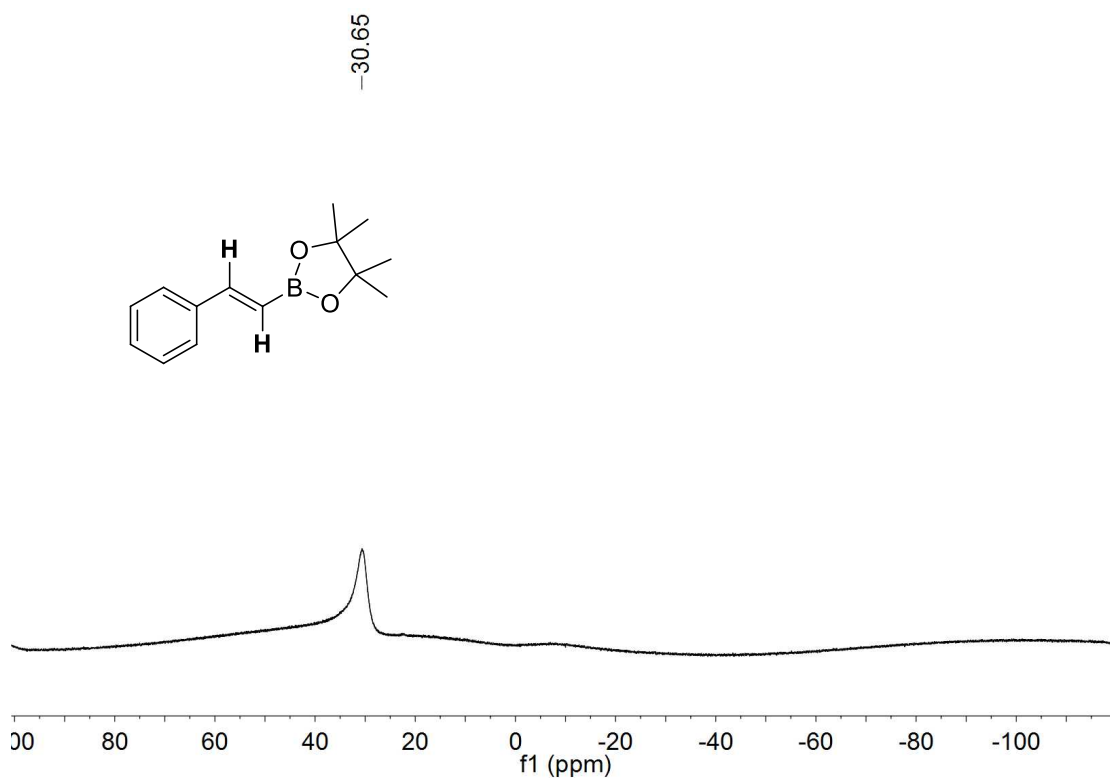

**Supplementary Figure S95.**  $^{11}\text{B}$  NMR spectrum for compound *E*-3ah (128 MHz,  $\text{CDCl}_3$ , 25  $^\circ\text{C}$ ).

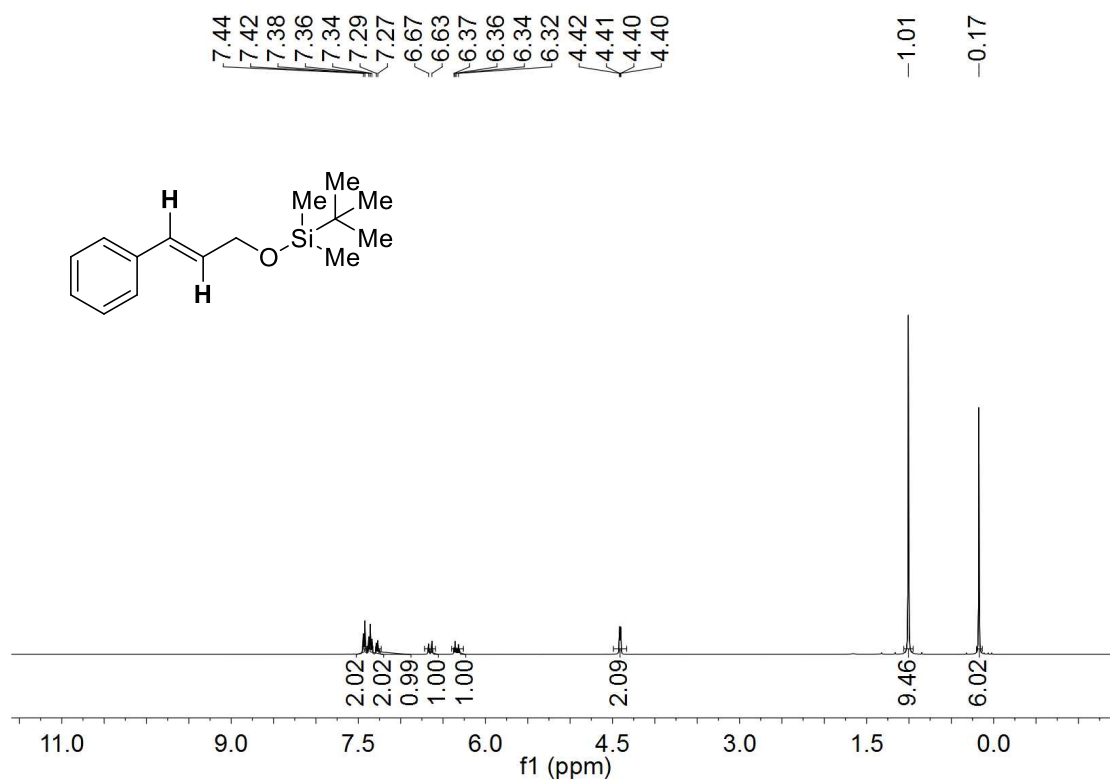

**Supplementary Figure S96.**  $^1\text{H}$  NMR spectrum for compound *E*-3ai (400 MHz,  $\text{CDCl}_3$ , 25  $^\circ\text{C}$ ).

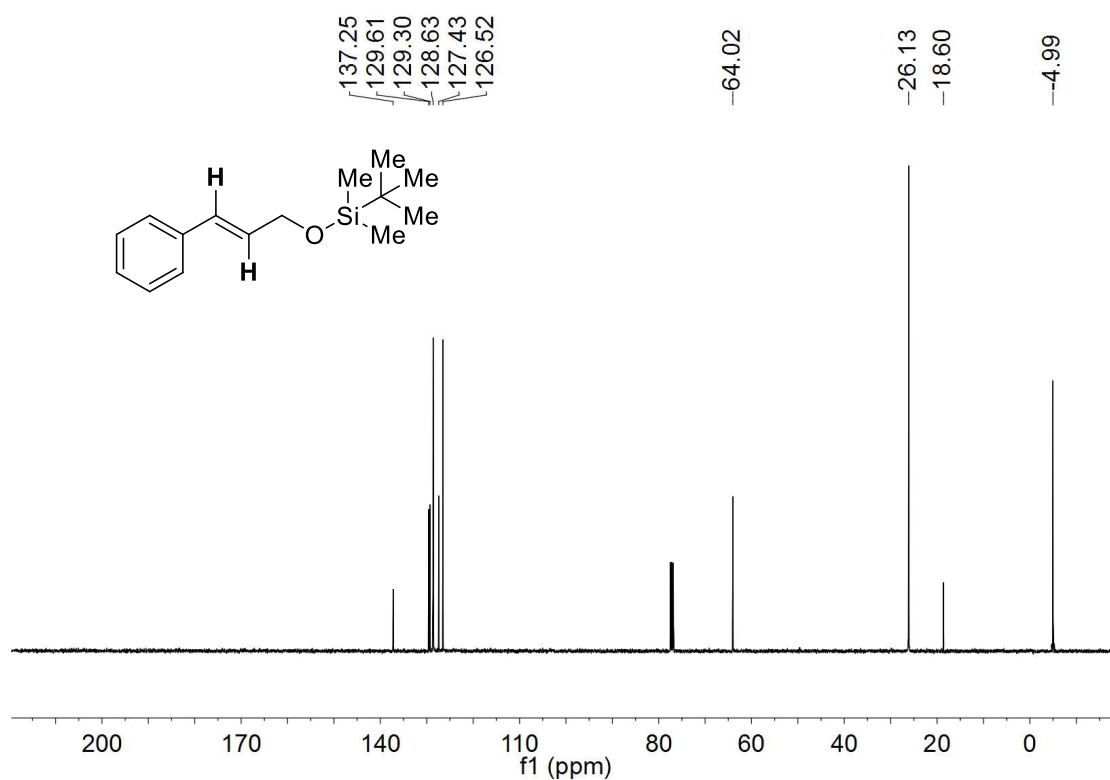

**Supplementary Figure S97.** <sup>13</sup>C NMR spectrum for compound *E*-3ai (100 MHz, CDCl<sub>3</sub>, 25 °C).

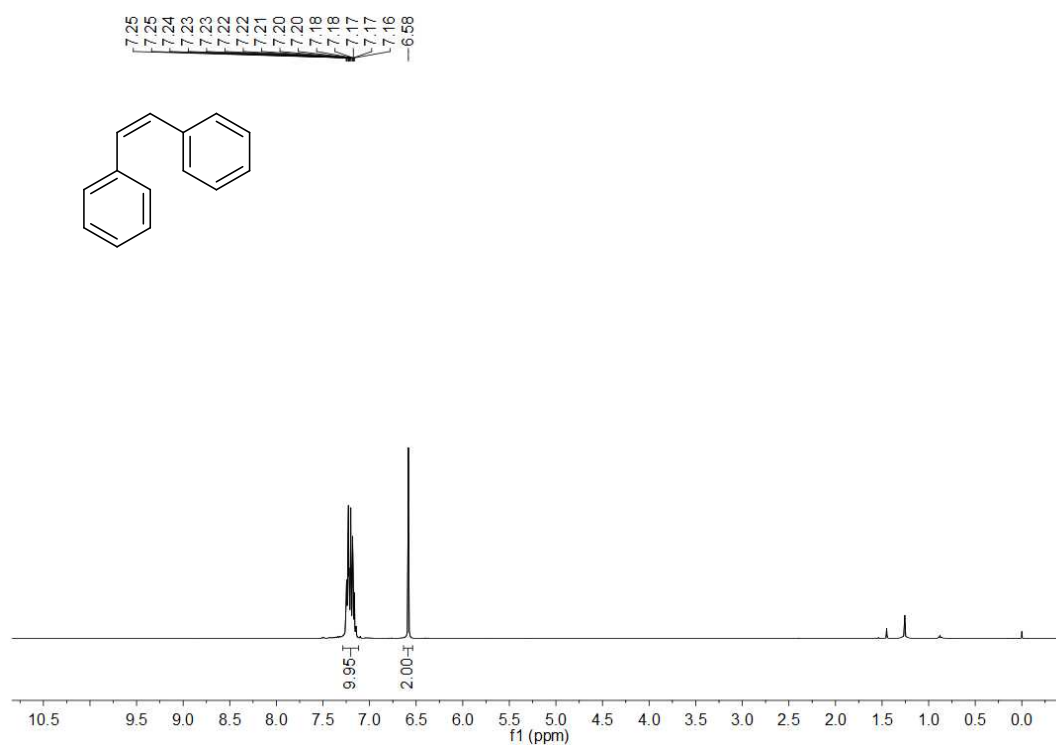

**Supplementary Figure S98.** <sup>1</sup>H NMR spectrum for compound *Z*-3a (400 MHz, CDCl<sub>3</sub>, 25 °C).

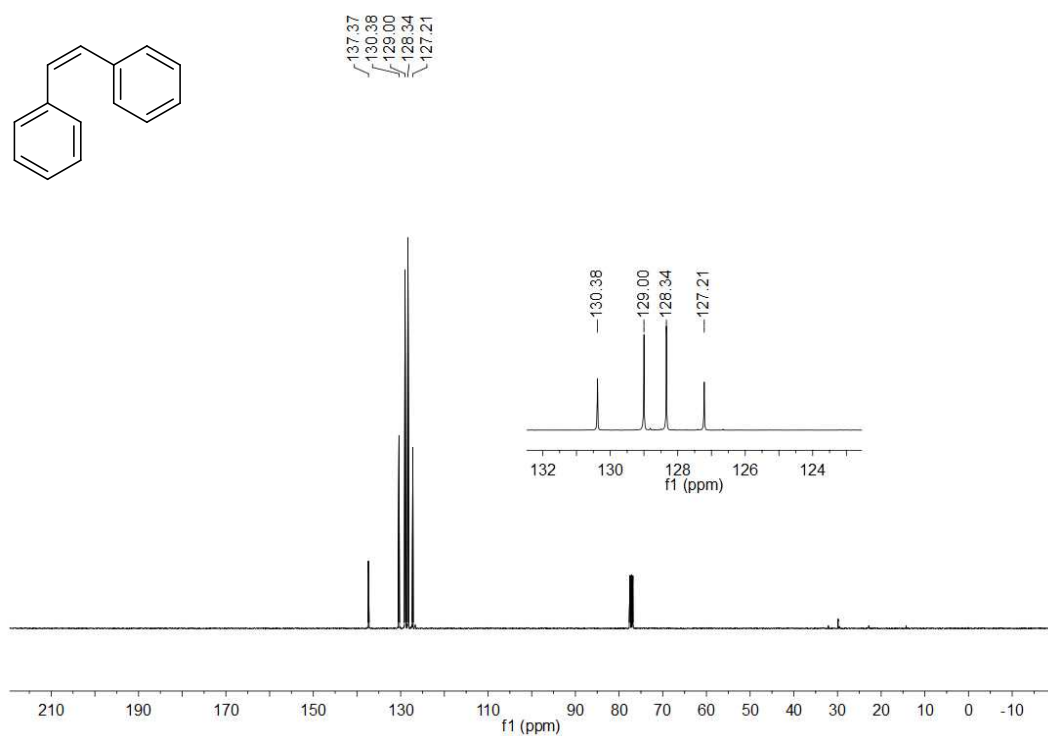

**Supplementary Figure S99.** <sup>13</sup>C NMR spectrum for compound Z-3a (100 MHz, CDCl<sub>3</sub>, 25 °C).

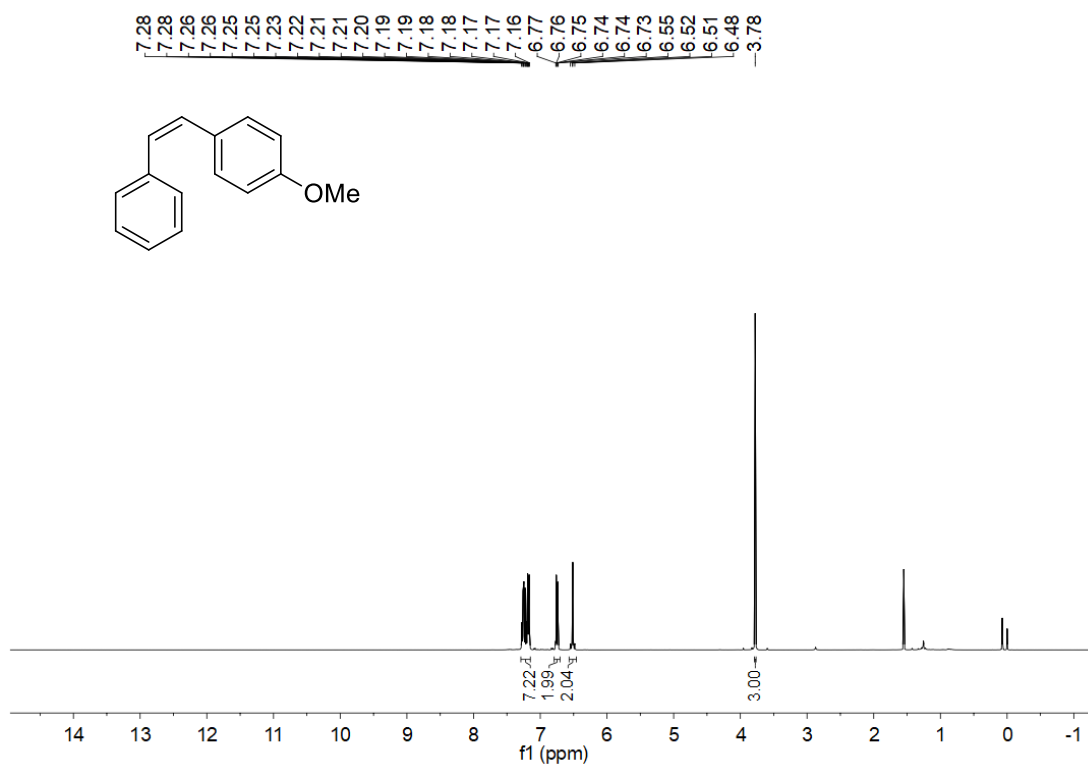

**Supplementary Figure S100.** <sup>1</sup>H NMR spectrum for compound Z-3j (400 MHz, CDCl<sub>3</sub>, 25 °C).

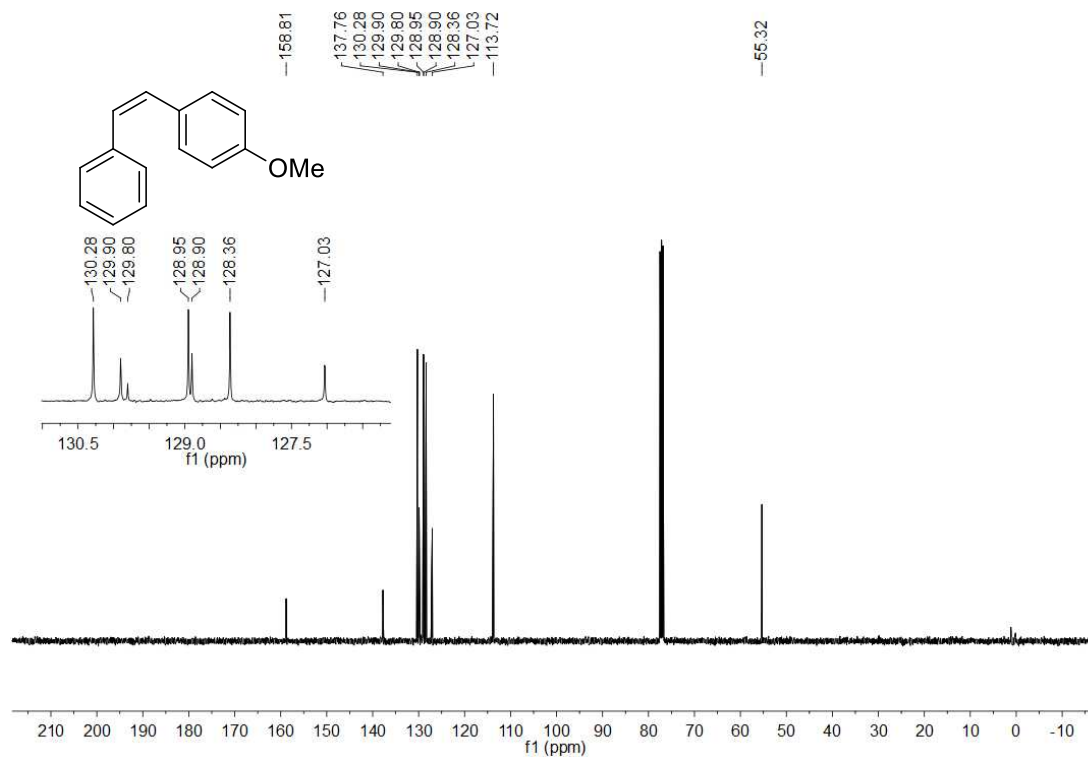

**Supplementary Figure S101.** <sup>13</sup>C NMR spectrum for compound Z-3j (100 MHz, CDCl<sub>3</sub>, 25 °C).

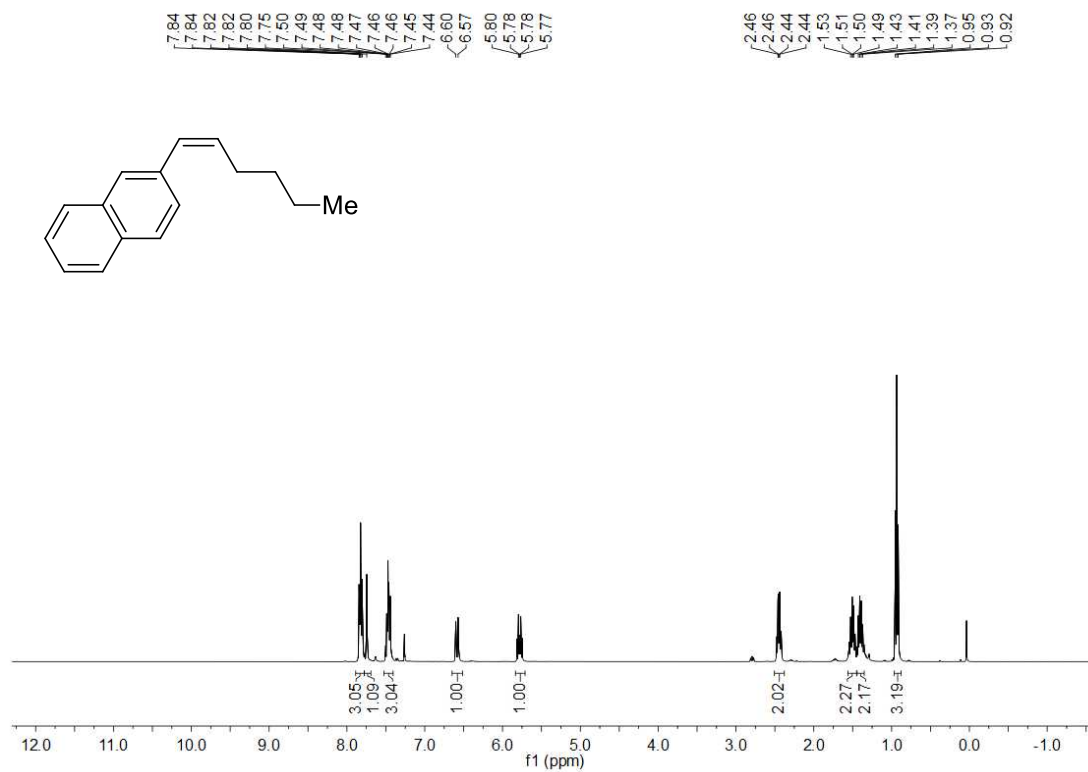

**Supplementary Figure S102.** <sup>1</sup>H NMR spectrum for compound Z-3b (400 MHz, CDCl<sub>3</sub>, 25 °C).



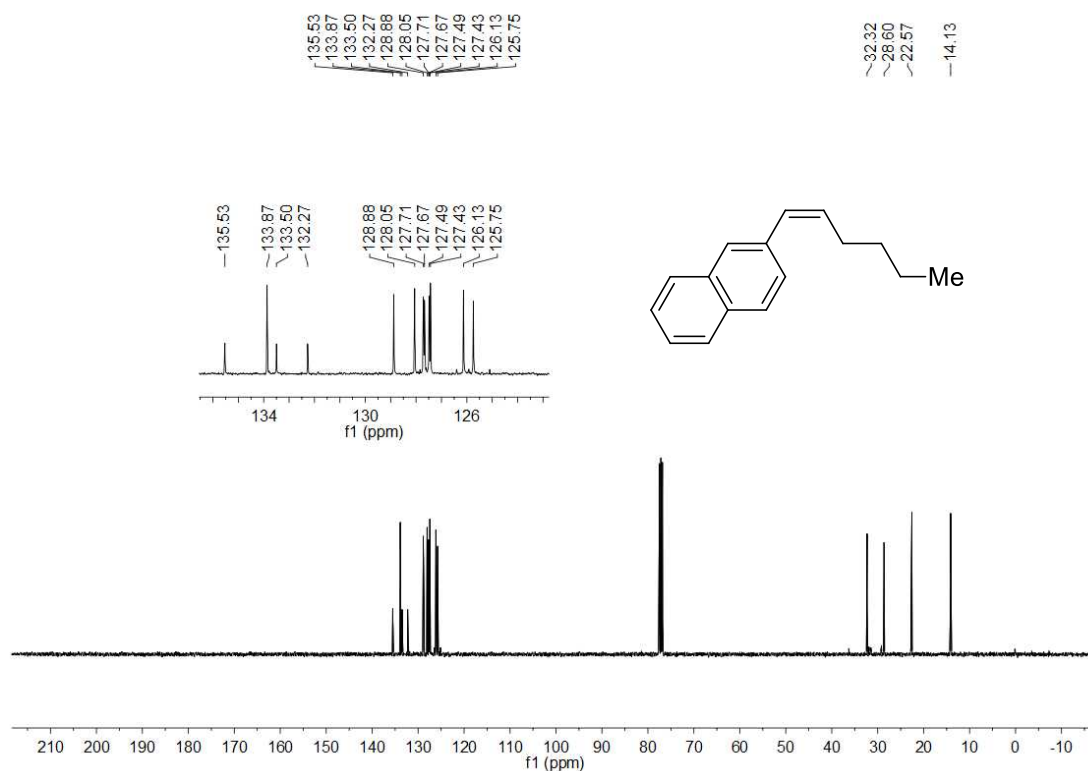

**Supplementary Figure S103.** <sup>13</sup>C NMR spectrum for compound Z-3b (100 MHz, CDCl<sub>3</sub>, 25 °C).

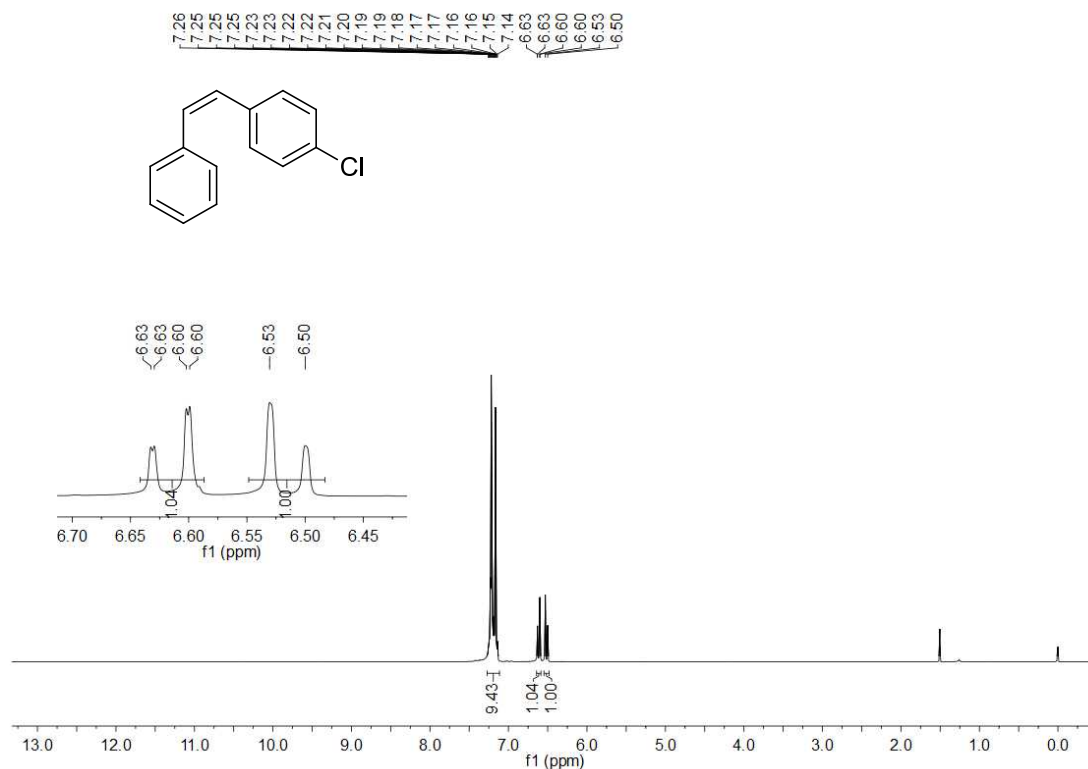

**Supplementary Figure S104.** <sup>1</sup>H NMR spectrum for compound Z-3aj (400 MHz, CDCl<sub>3</sub>, 25 °C).

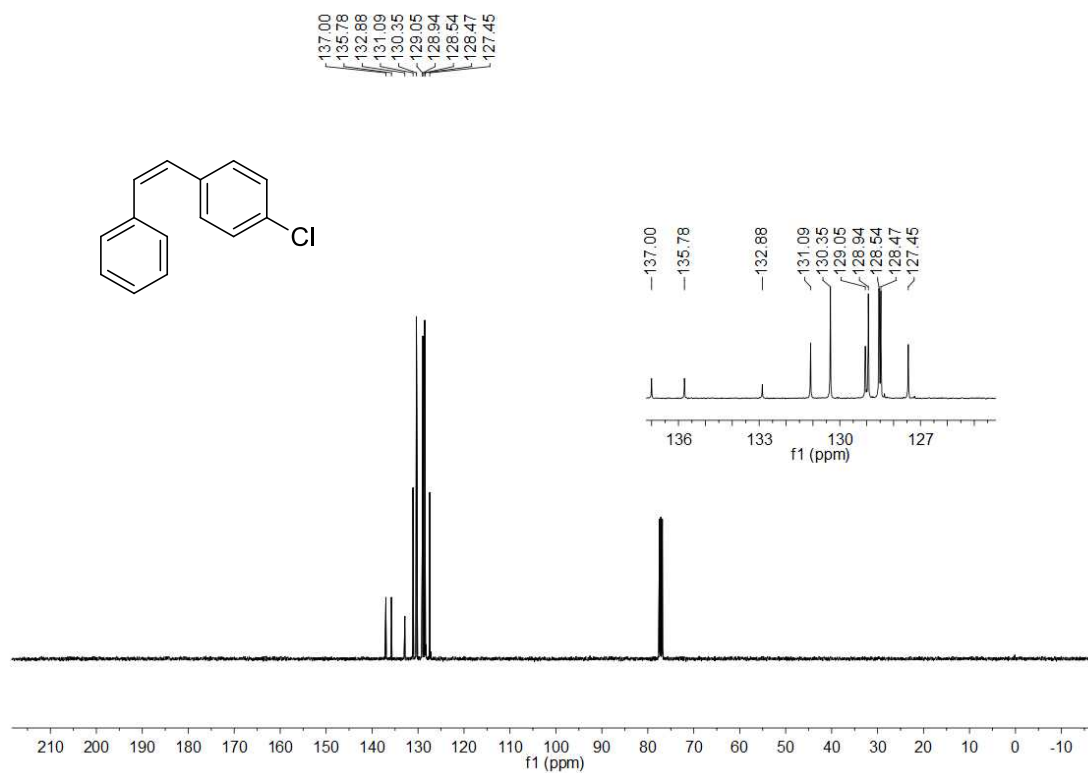

**Supplementary Figure S105.** <sup>13</sup>C NMR spectrum for compound Z-3aj (100 MHz, CDCl<sub>3</sub>, 25 °C).

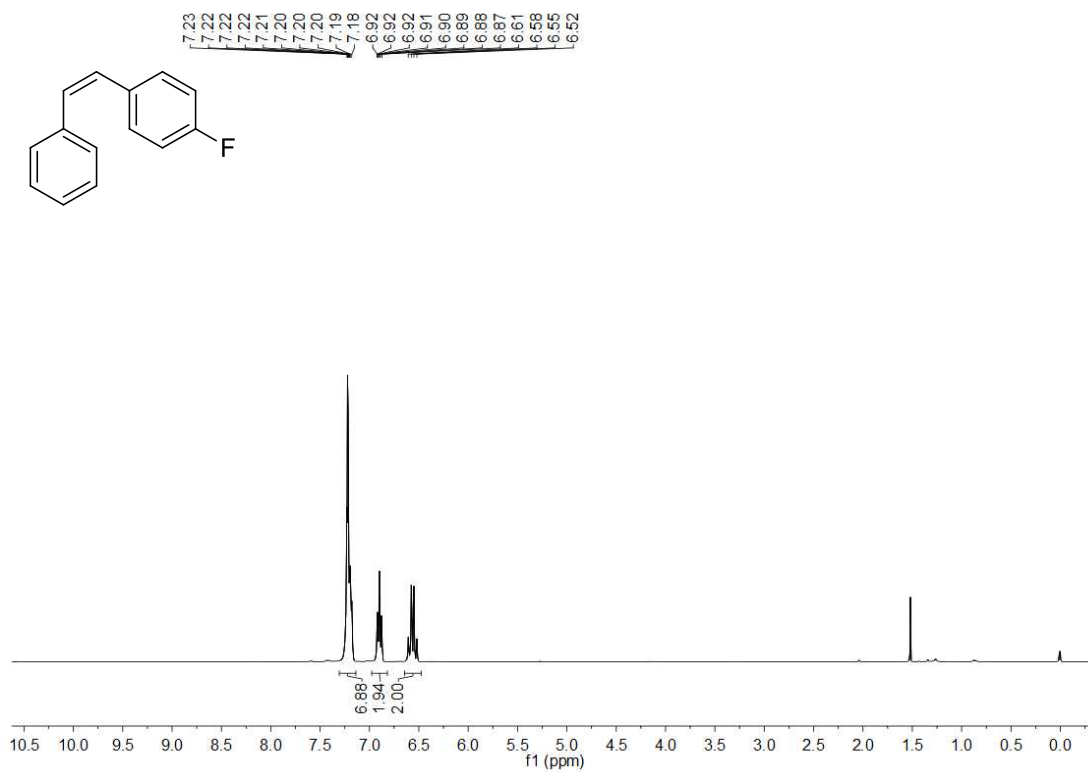

**Supplementary Figure S106.** <sup>1</sup>H NMR spectrum for compound Z-3ak (400 MHz, CDCl<sub>3</sub>, 25 °C).

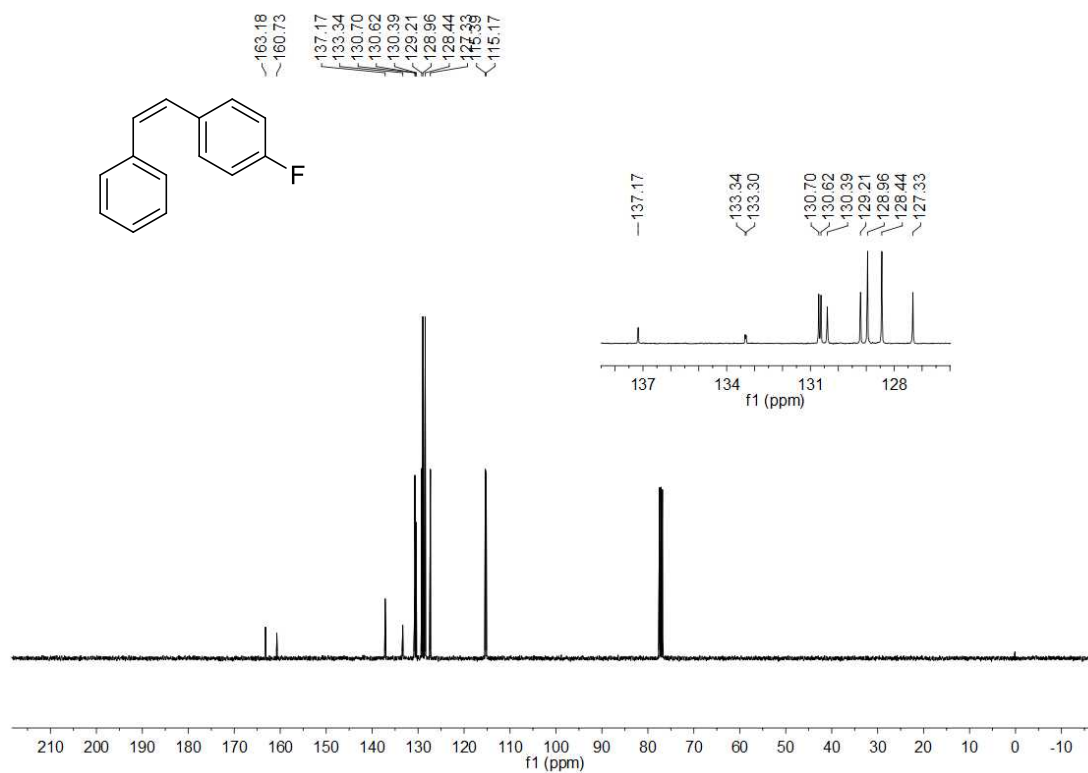

**Supplementary Figure S107.** <sup>13</sup>C NMR spectrum for compound Z-3ak (100 MHz, CDCl<sub>3</sub>, 25 °C).

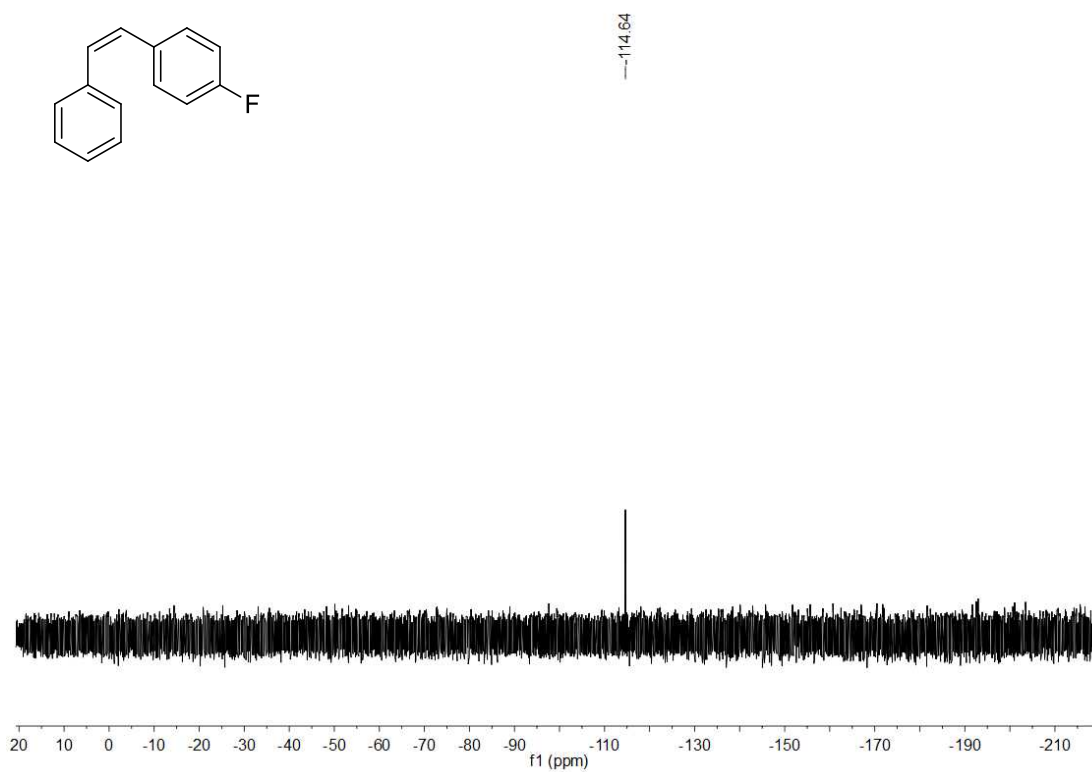

**Supplementary Figure S108.** <sup>19</sup>F NMR spectrum for compound Z-3ak (376 MHz, CDCl<sub>3</sub>, 25 °C).

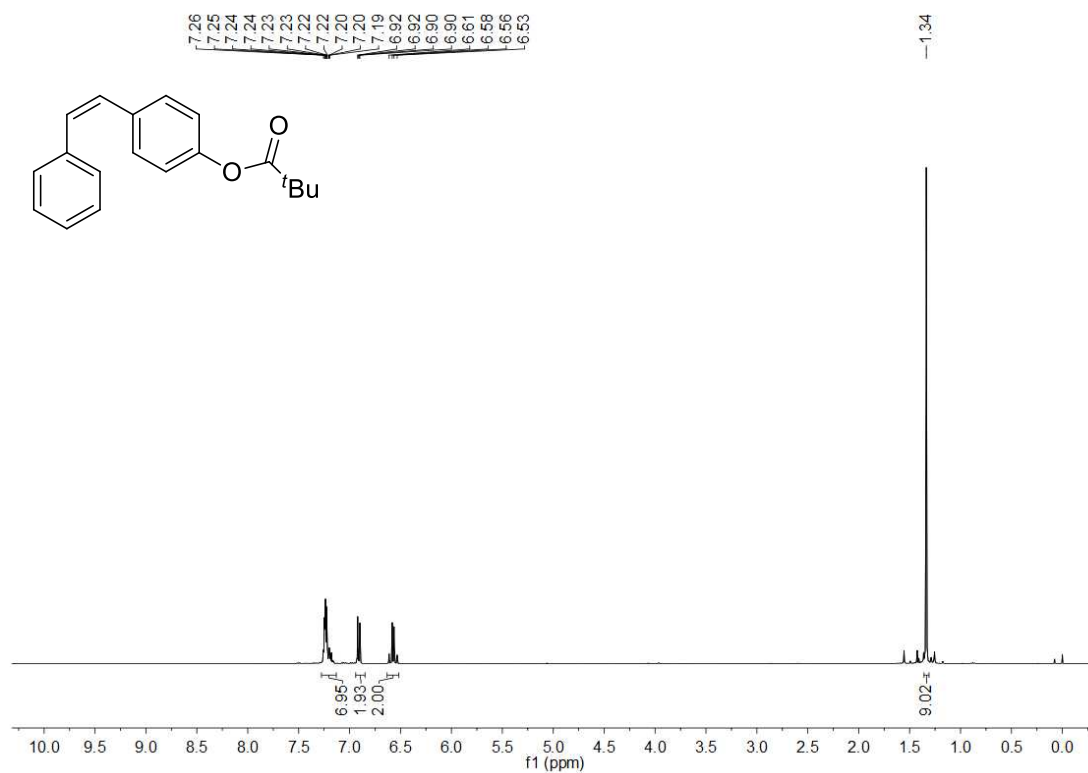

**Supplementary Figure S109.** <sup>1</sup>H NMR spectrum for compound Z-3al (400 MHz, CDCl<sub>3</sub>, 25 °C).

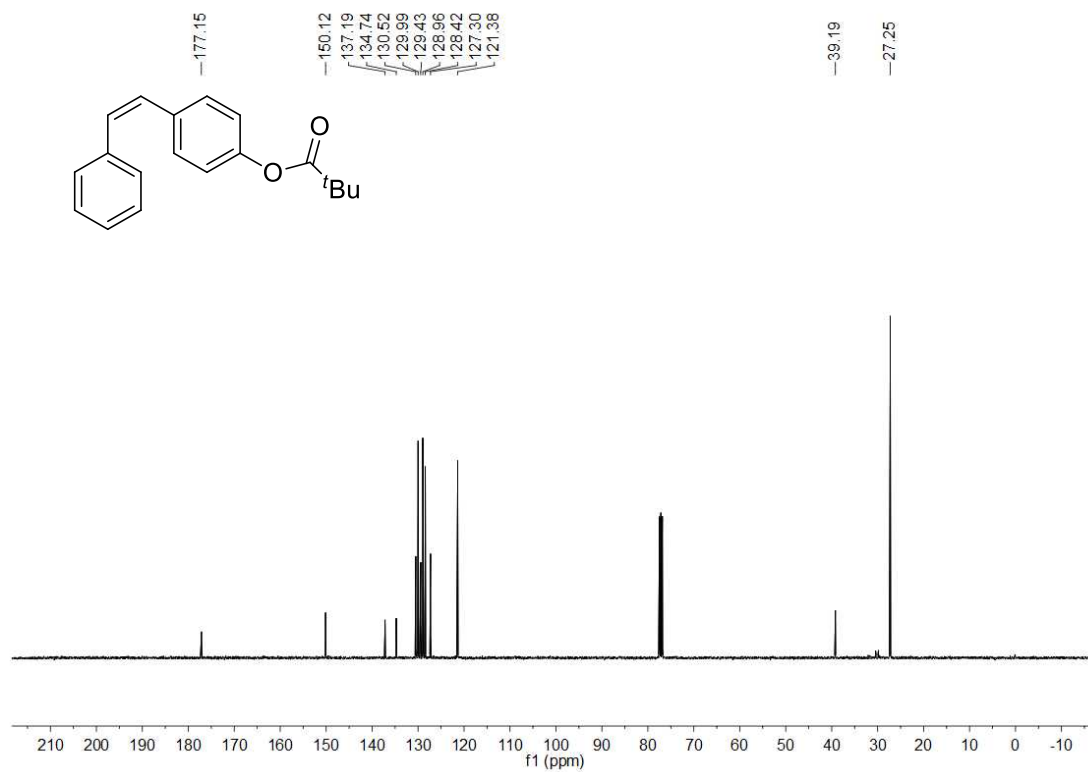

**Supplementary Figure S110.** <sup>13</sup>C NMR spectrum for compound Z-3al (100 MHz, CDCl<sub>3</sub>, 25 °C).

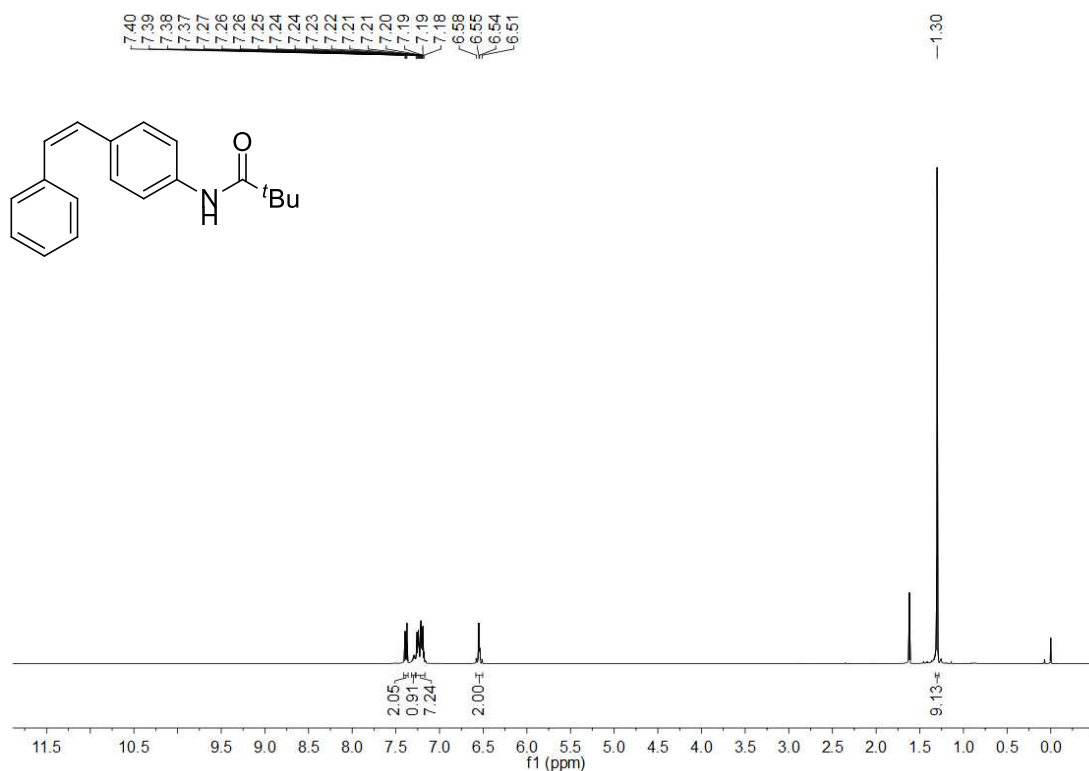

**Supplementary Figure S111.** <sup>1</sup>H NMR spectrum for compound Z-3am (400 MHz, CDCl<sub>3</sub>, 25 °C).

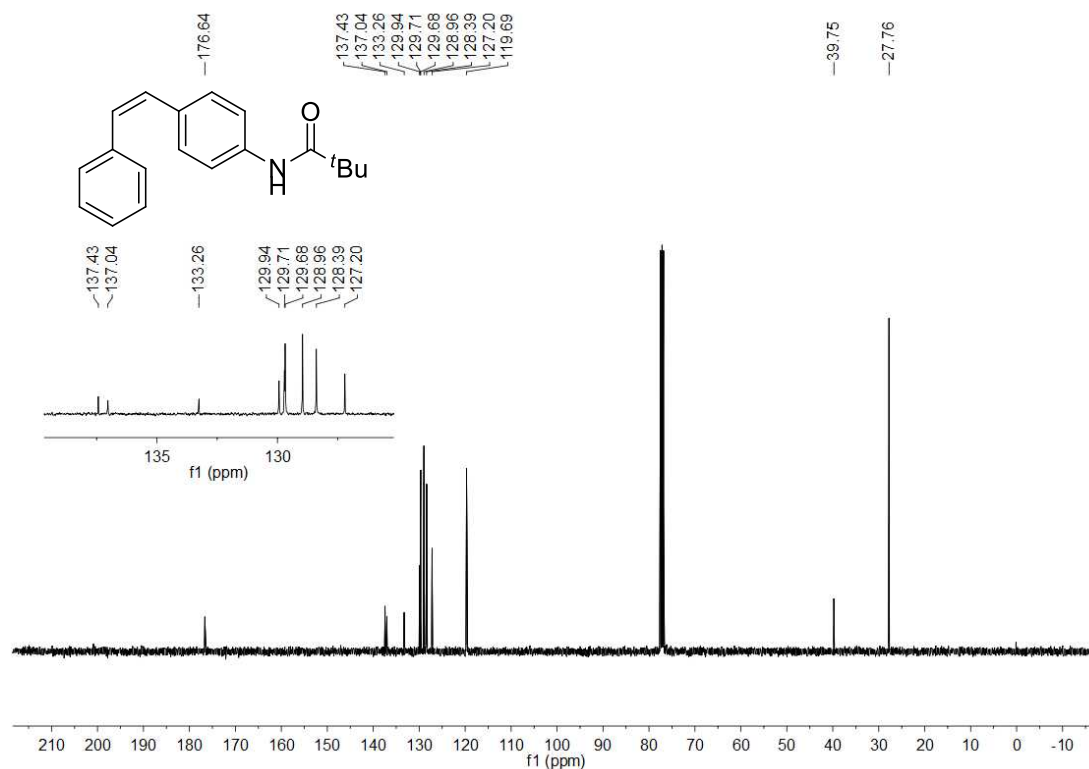

**Supplementary Figure S112.** <sup>13</sup>C NMR spectrum for compound Z-3am (100 MHz, CDCl<sub>3</sub>, 25 °C).

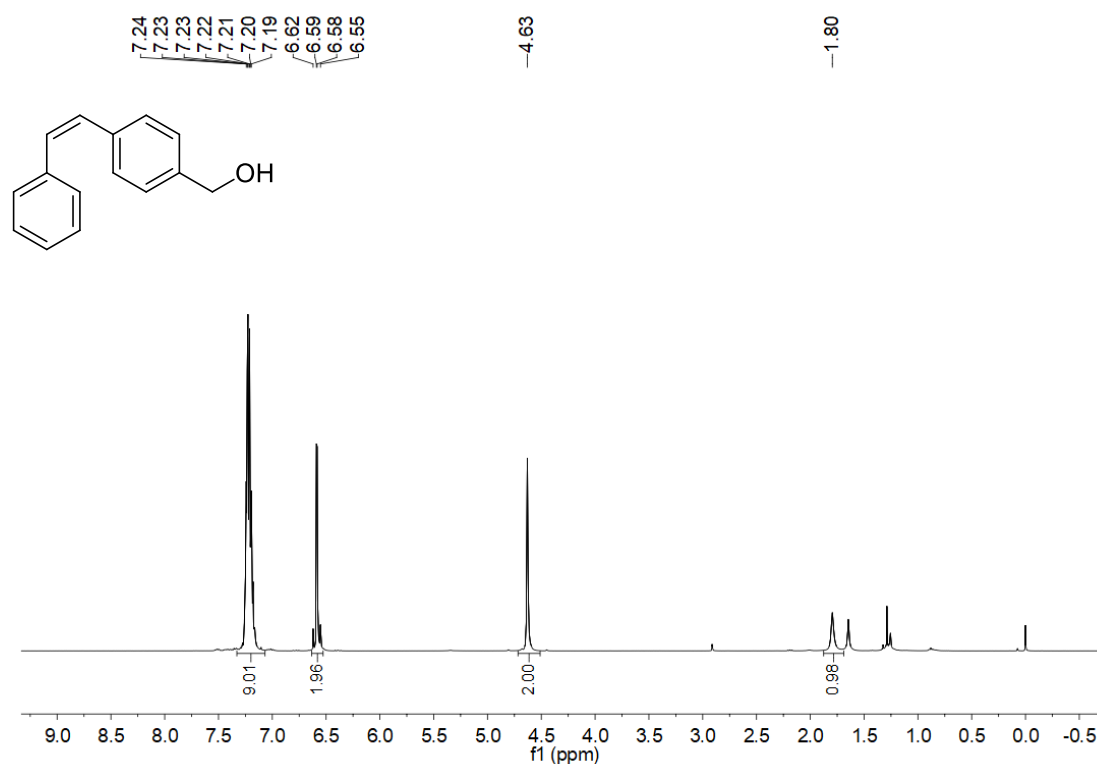

**Supplementary Figure S113.** <sup>1</sup>H NMR spectrum for compound Z-3an (400 MHz, CDCl<sub>3</sub>, 25 °C).

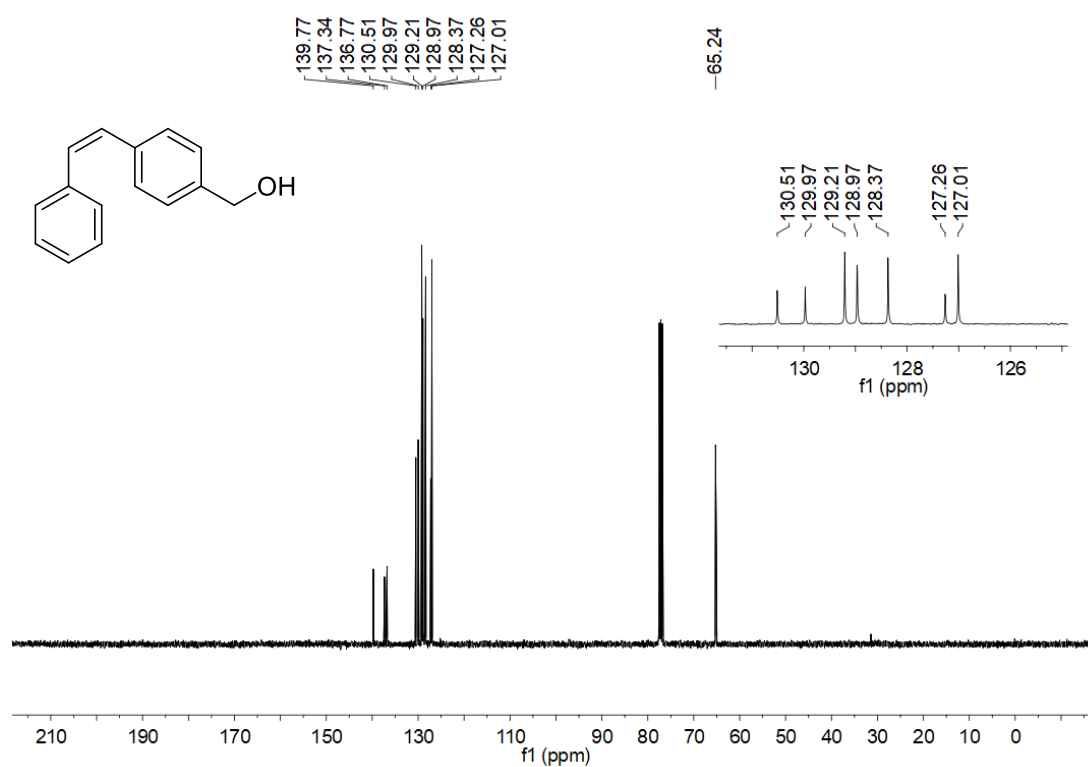

**Supplementary Figure S114.** <sup>13</sup>C NMR spectrum for compound Z-3an (100 MHz, CDCl<sub>3</sub>, 25 °C).

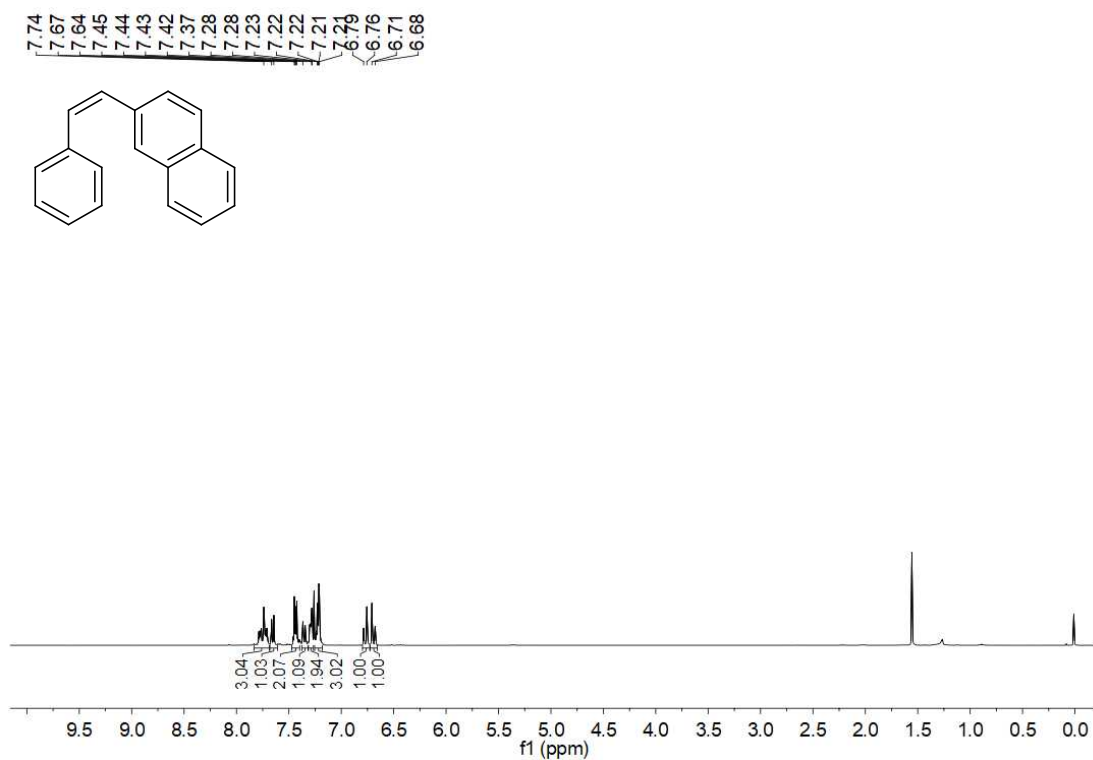

**Supplementary Figure S115.** <sup>1</sup>H NMR spectrum for compound Z-3ao (400 MHz, CDCl<sub>3</sub>, 25 °C).

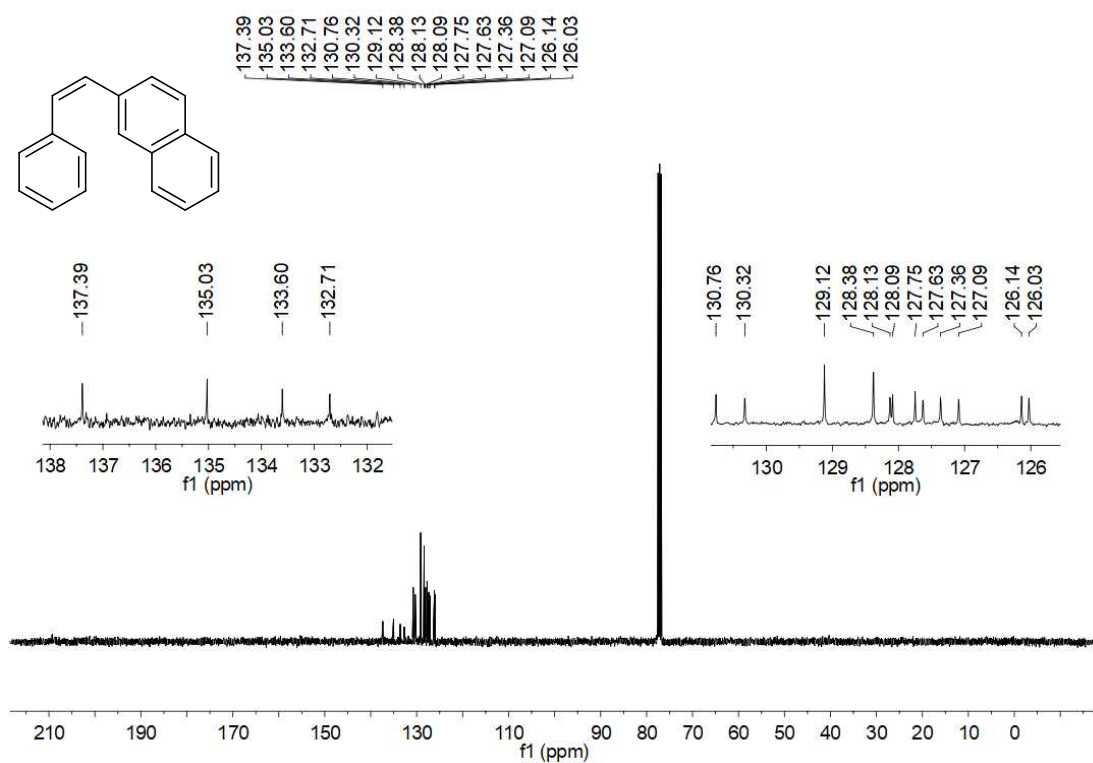

**Supplementary Figure S116.** <sup>13</sup>C NMR spectrum for compound Z-3ao (100 MHz, CDCl<sub>3</sub>, 25 °C).

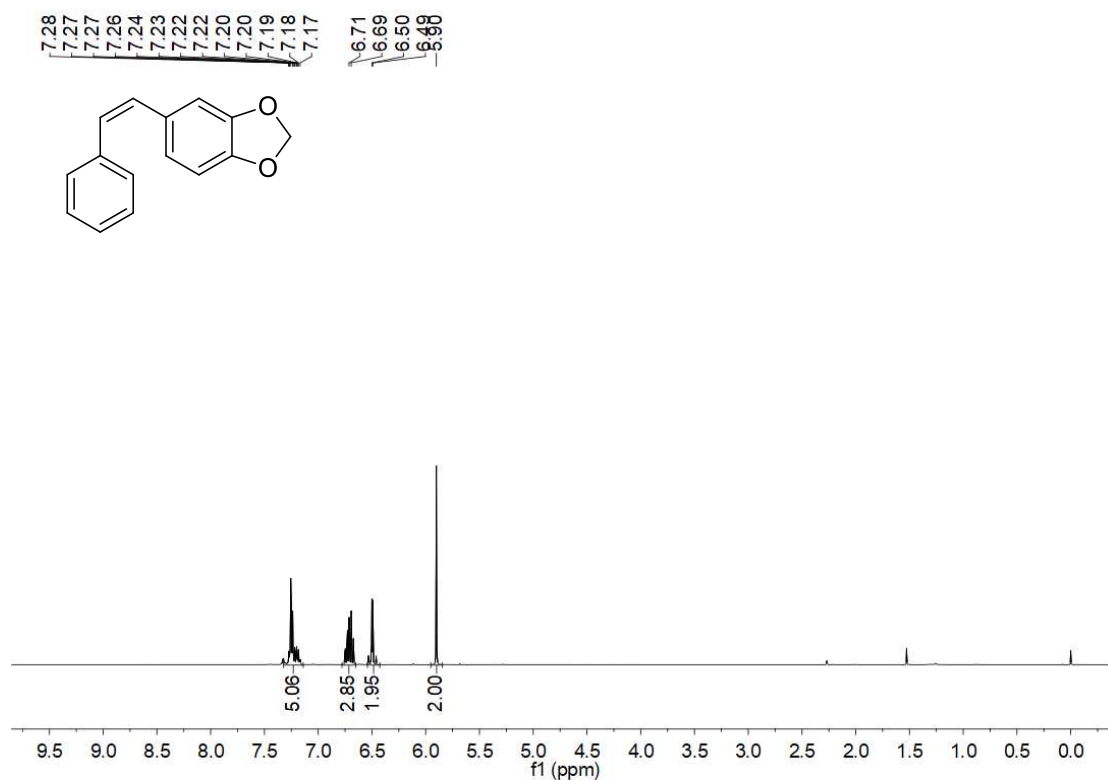

**Supplementary Figure S117.** <sup>1</sup>H NMR spectrum for compound Z-3ap (400 MHz, CDCl<sub>3</sub>, 25 °C).

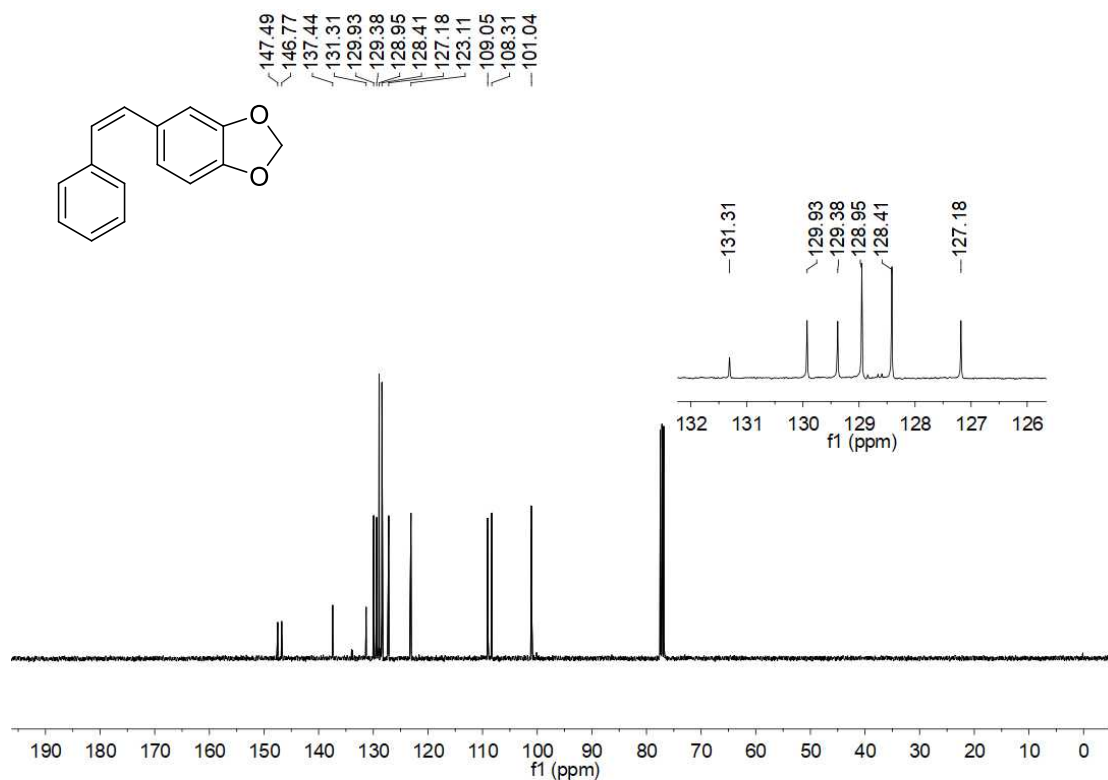

**Supplementary Figure S118.** <sup>13</sup>C NMR spectrum for compound Z-3ap (100 MHz, CDCl<sub>3</sub>, 25 °C).



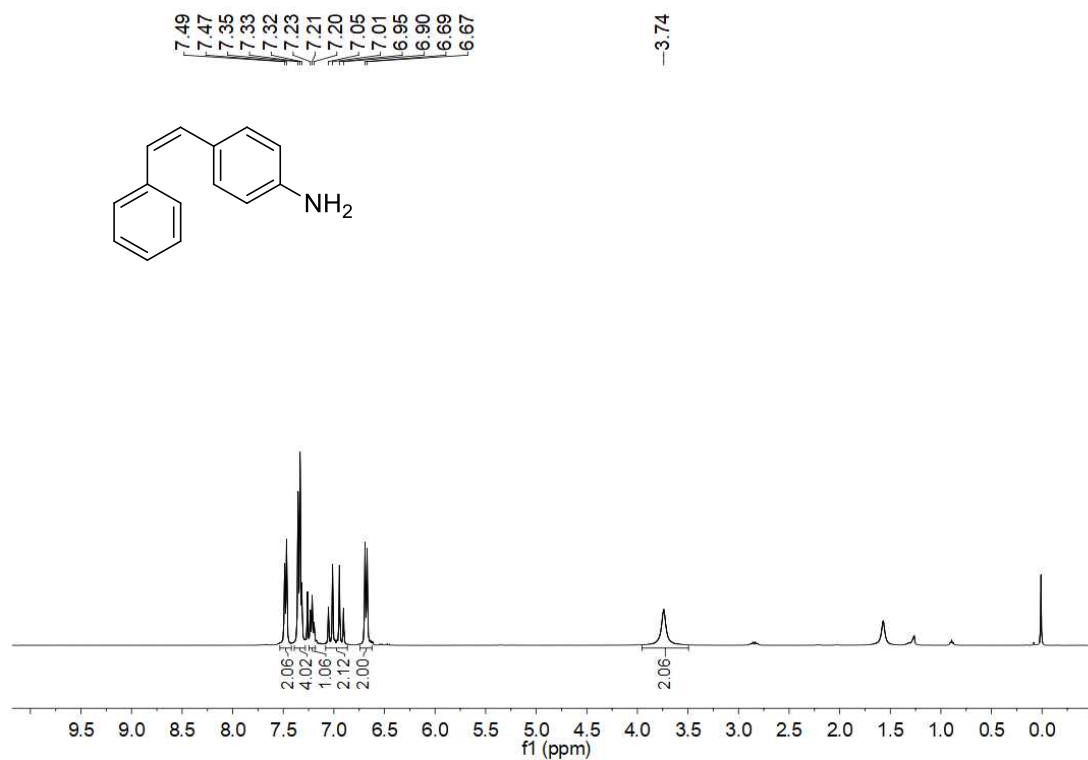

**Supplementary Figure S119.** <sup>1</sup>H NMR spectrum for compound Z-3i (400 MHz, CDCl<sub>3</sub>, 25 °C).

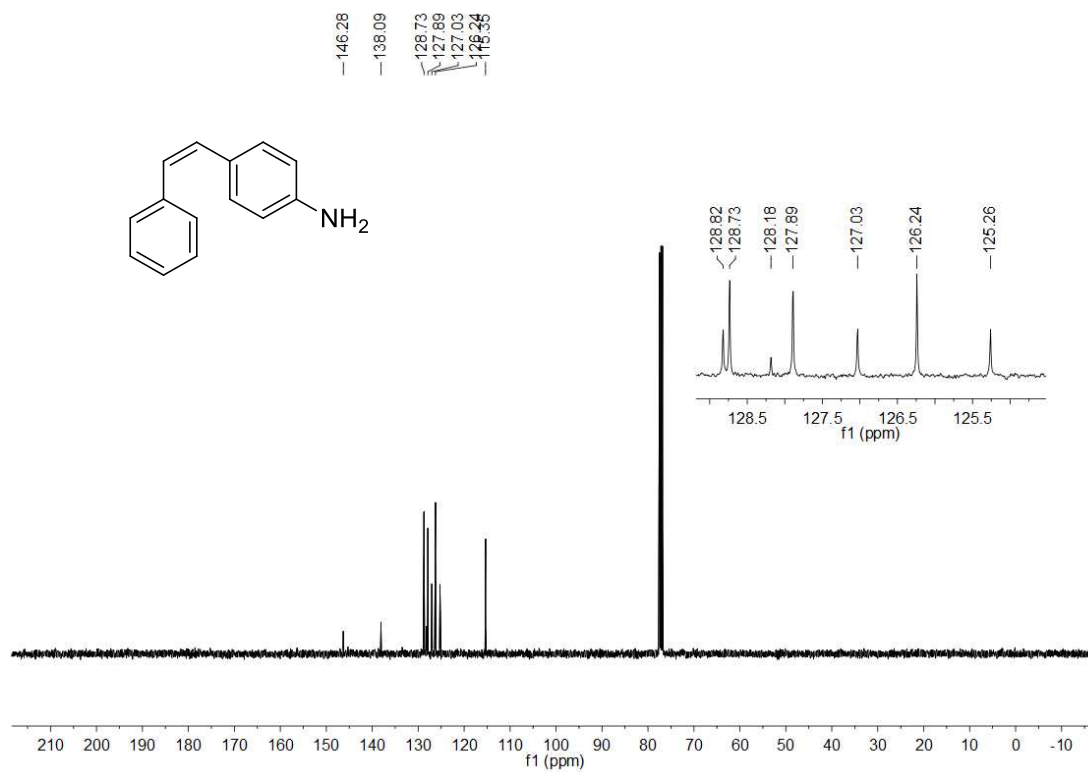

**Supplementary Figure S120.** <sup>13</sup>C NMR spectrum for compound Z-3i (100 MHz, CDCl<sub>3</sub>, 25 °C).

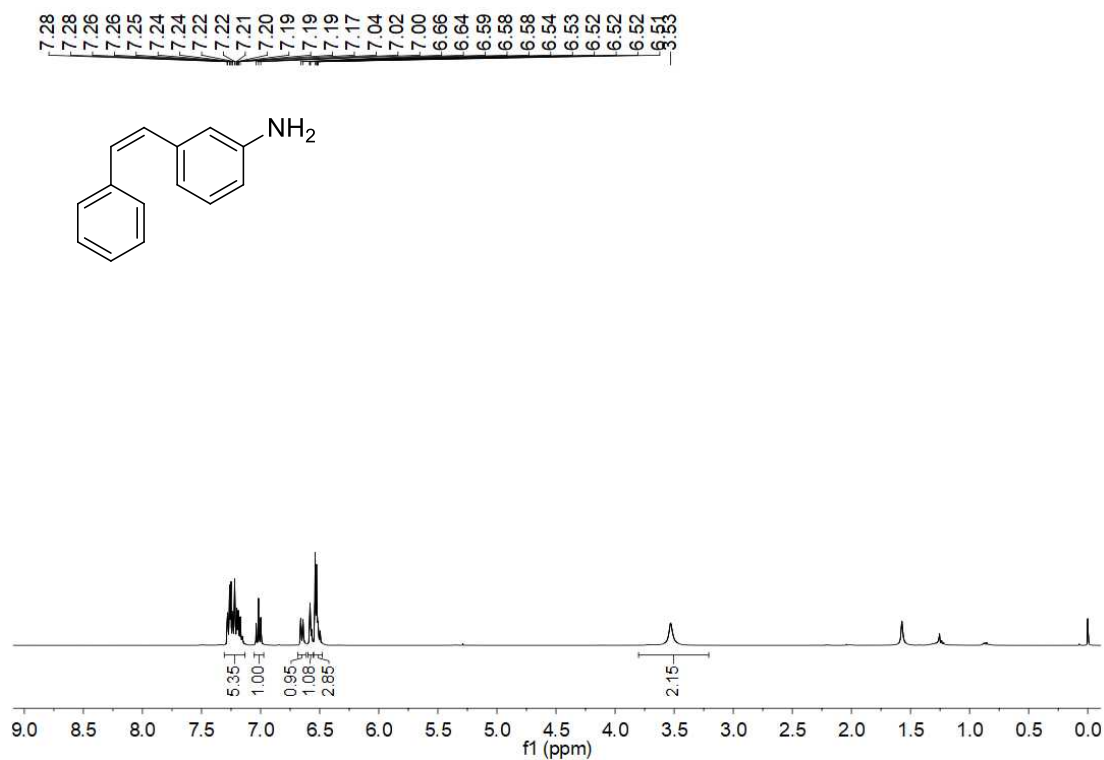

**Supplementary Figure S121.** <sup>1</sup>H NMR spectrum for compound Z-3aq (400 MHz, CDCl<sub>3</sub>, 25 °C).

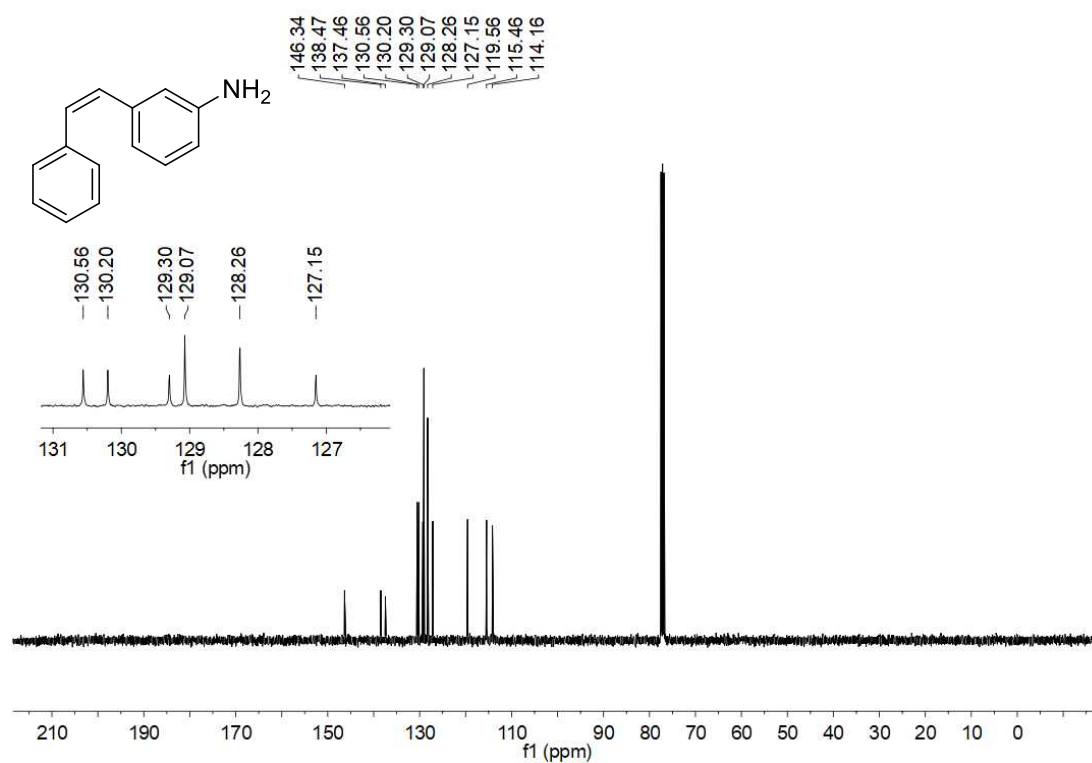

**Supplementary Figure S122.** <sup>13</sup>C NMR spectrum for compound Z-3aq (100 MHz, CDCl<sub>3</sub>, 25 °C).

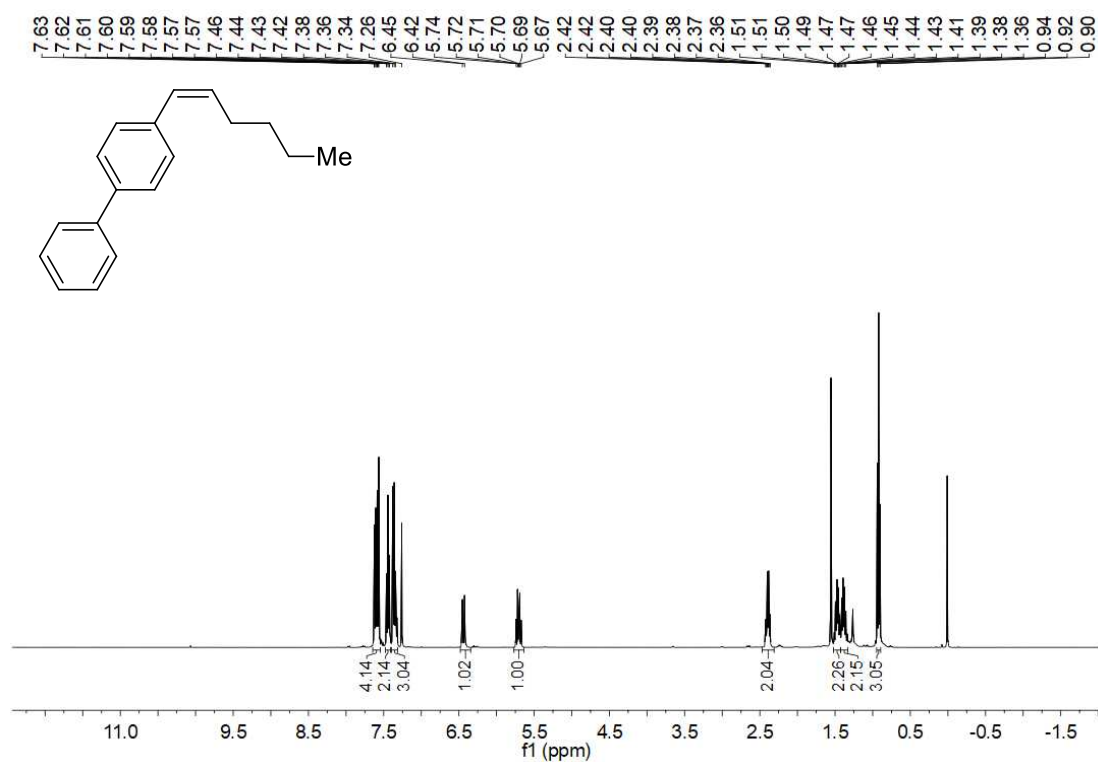

**Supplementary Figure S123.** <sup>1</sup>H NMR spectrum for compound Z-3x (400 MHz, CDCl<sub>3</sub>, 25 °C).

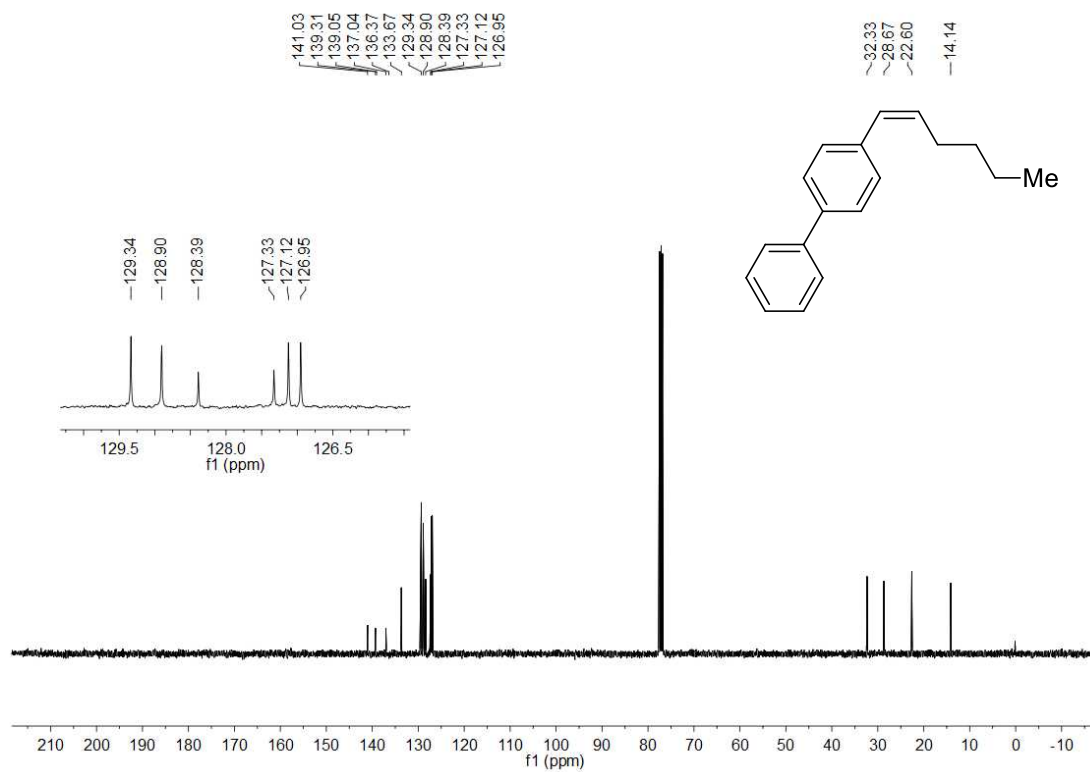

**Supplementary Figure S124.** <sup>13</sup>C NMR spectrum for compound Z-3x (100 MHz, CDCl<sub>3</sub>, 25 °C).

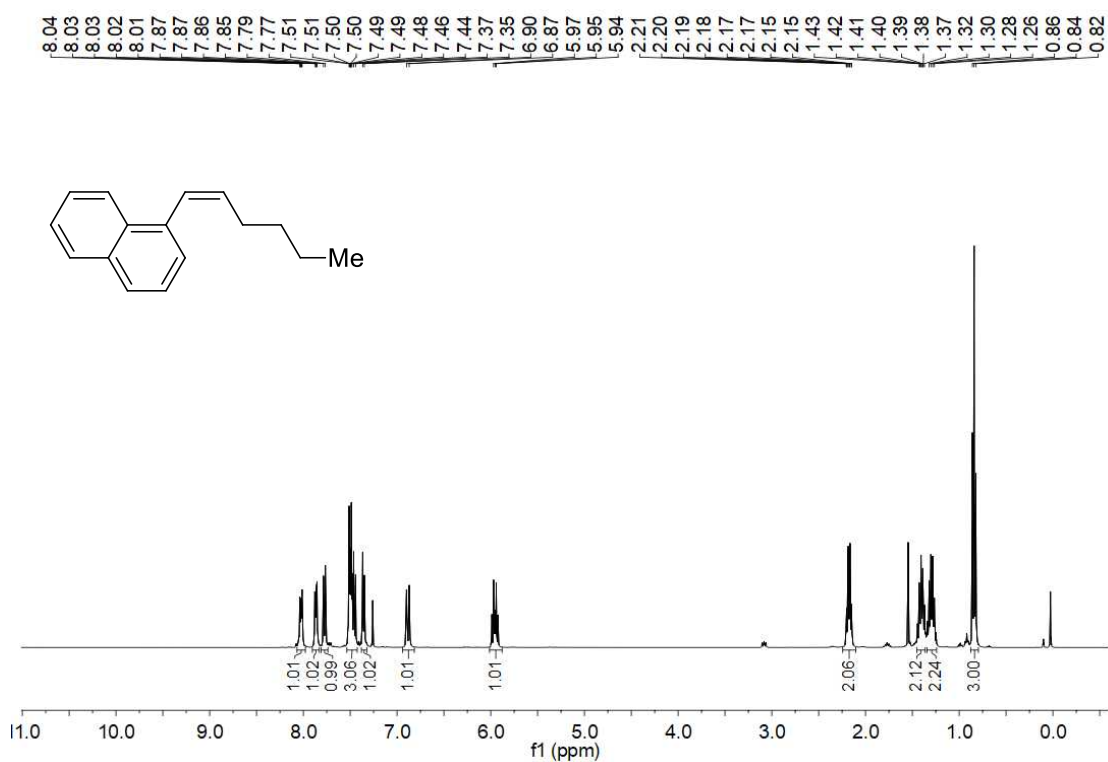

**Supplementary Figure S125.** <sup>1</sup>H NMR spectrum for compound Z-3ar (400 MHz, CDCl<sub>3</sub>, 25 °C).

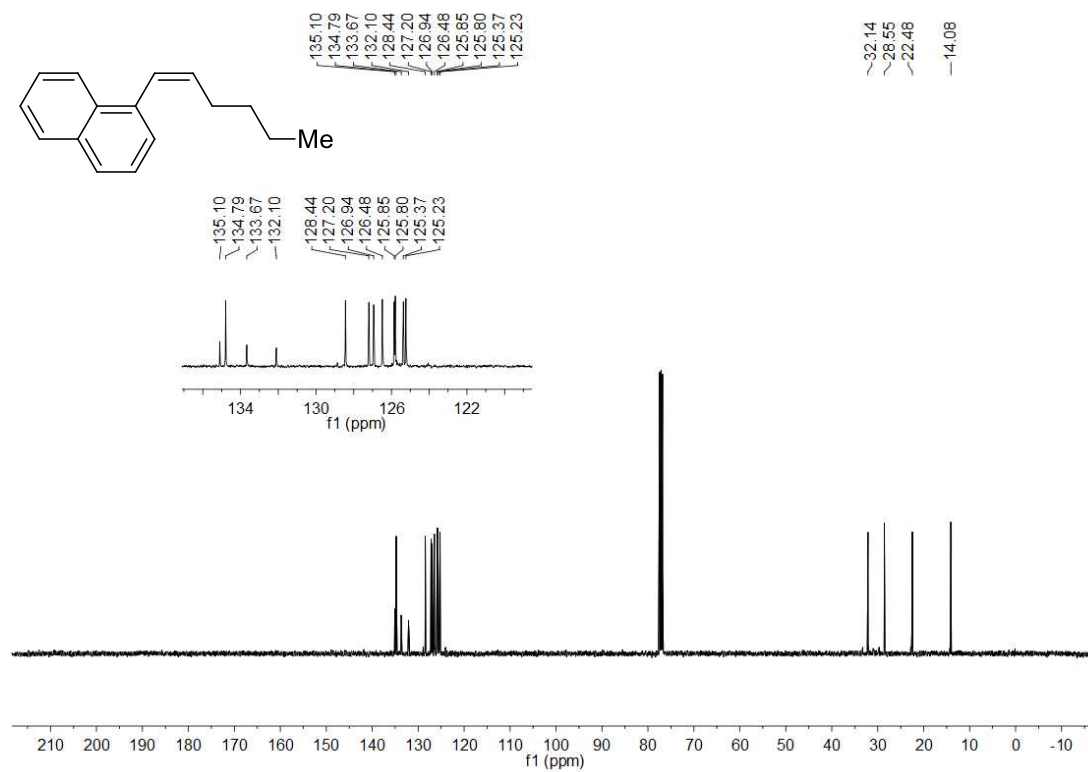

**Supplementary Figure S126.** <sup>13</sup>C NMR spectrum for compound Z-3ar (100 MHz, CDCl<sub>3</sub>, 25 °C).

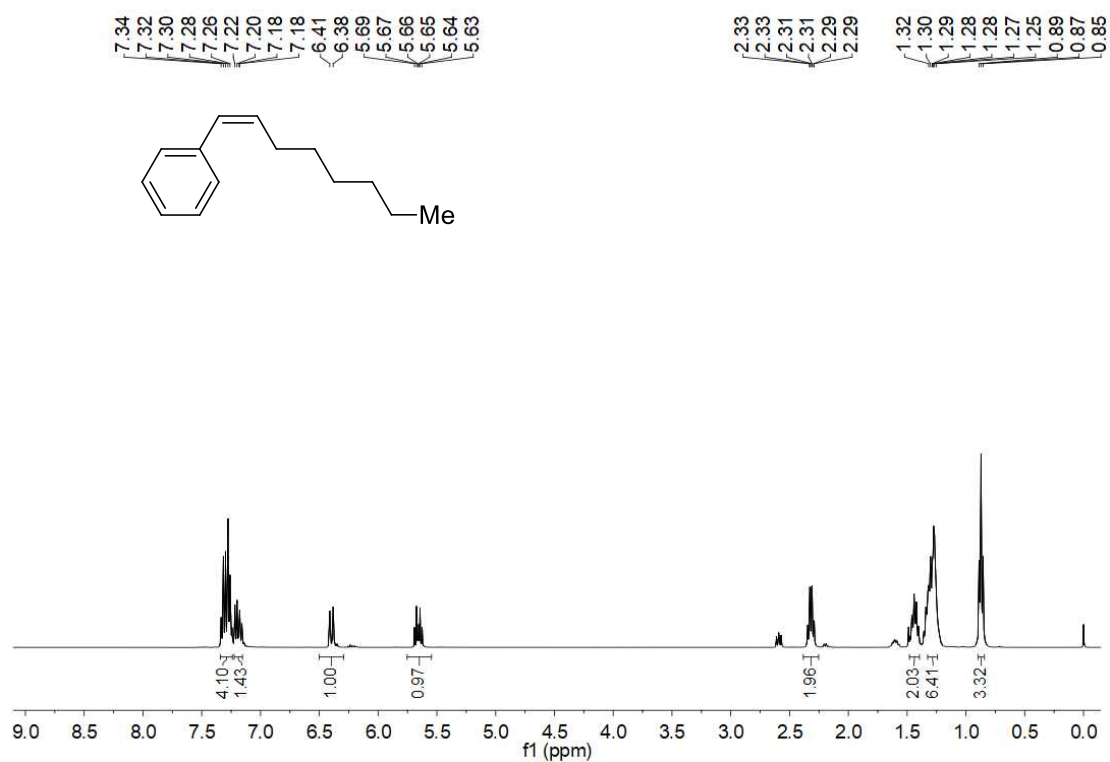

**Supplementary Figure S127.** <sup>1</sup>H NMR spectrum for compound Z-3as (400 MHz, CDCl<sub>3</sub>, 25 °C).

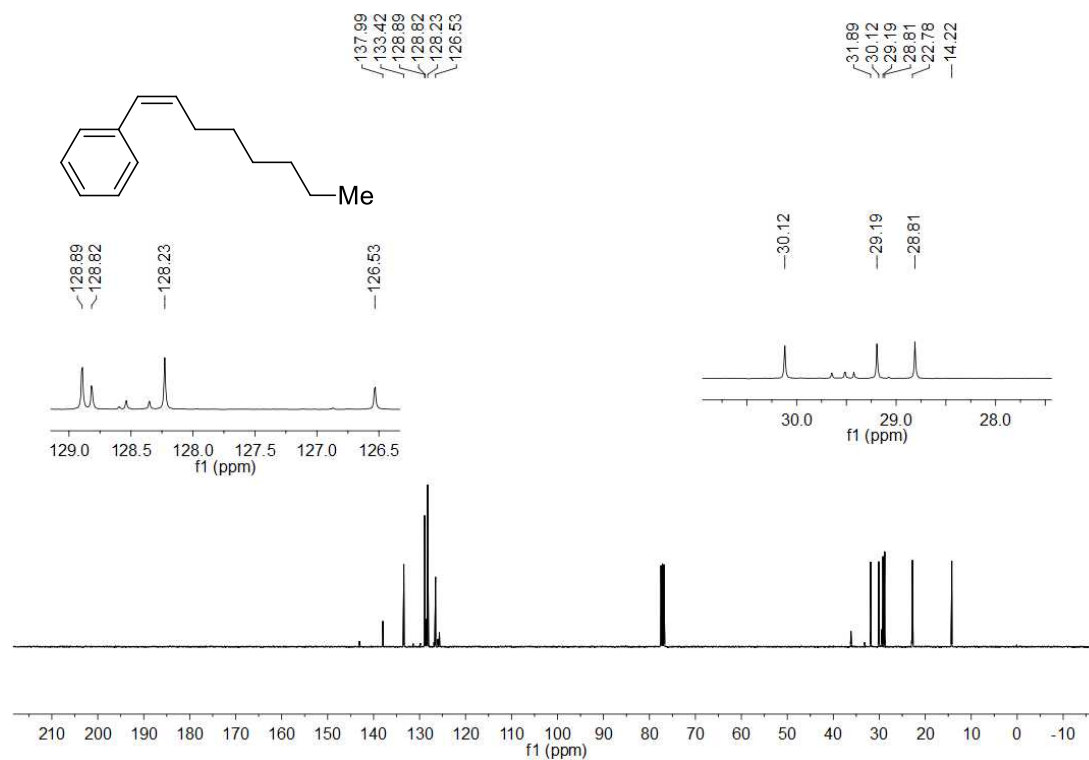

**Supplementary Figure S128.** <sup>13</sup>C NMR spectrum for compound Z-3as (100 MHz, CDCl<sub>3</sub>, 25 °C).

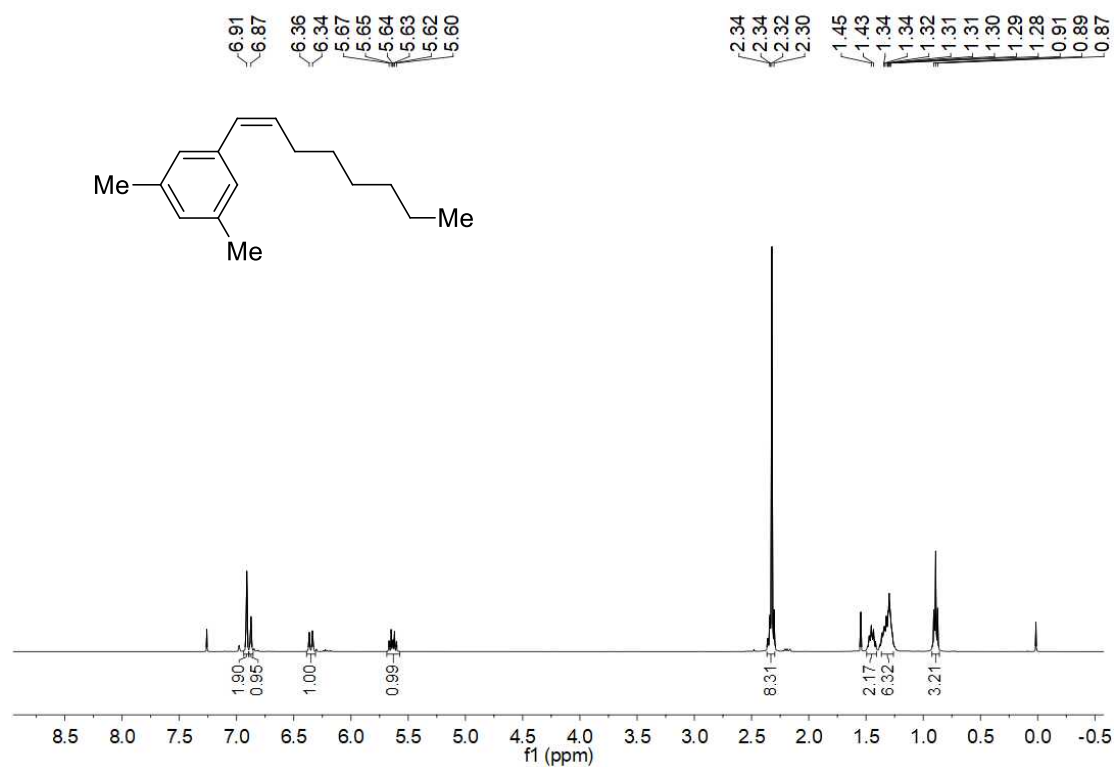

**Supplementary Figure S129.** <sup>1</sup>H NMR spectrum for compound Z-3u (400 MHz, CDCl<sub>3</sub>, 25 °C).

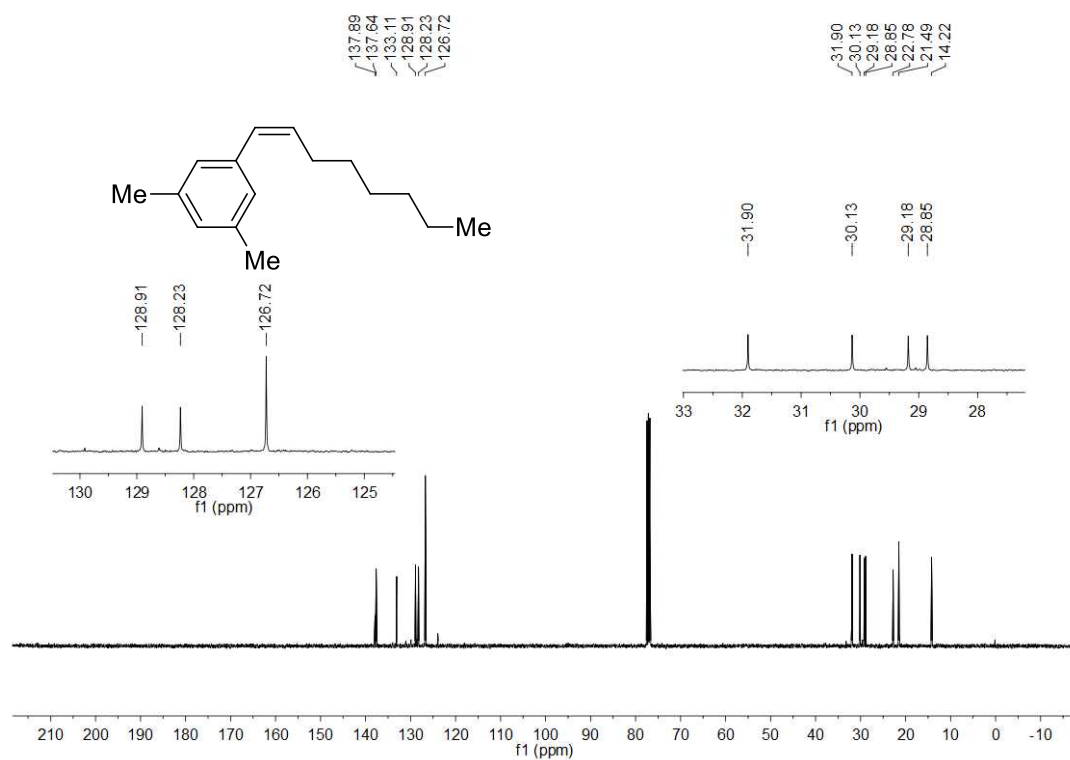

**Supplementary Figure S130.** <sup>13</sup>C NMR spectrum for compound Z-3u (100 MHz, CDCl<sub>3</sub>, 25 °C).

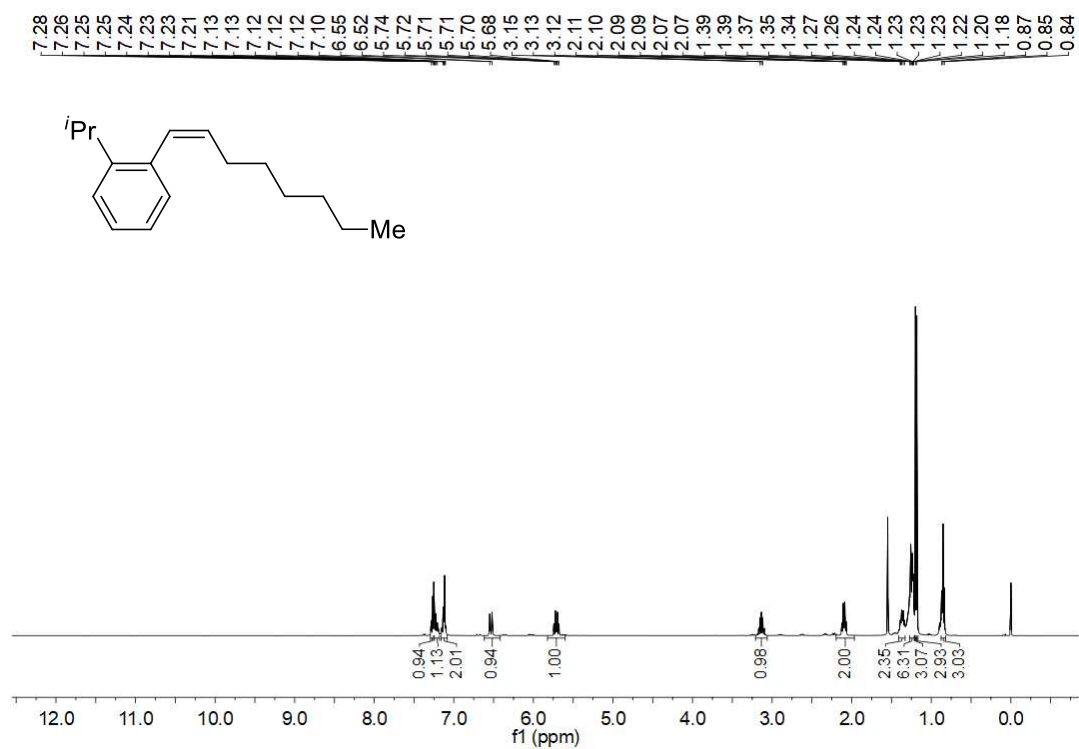

**Supplementary Figure S131.** <sup>1</sup>H NMR spectrum for compound Z-3at (400 MHz, CDCl<sub>3</sub>, 25 °C).

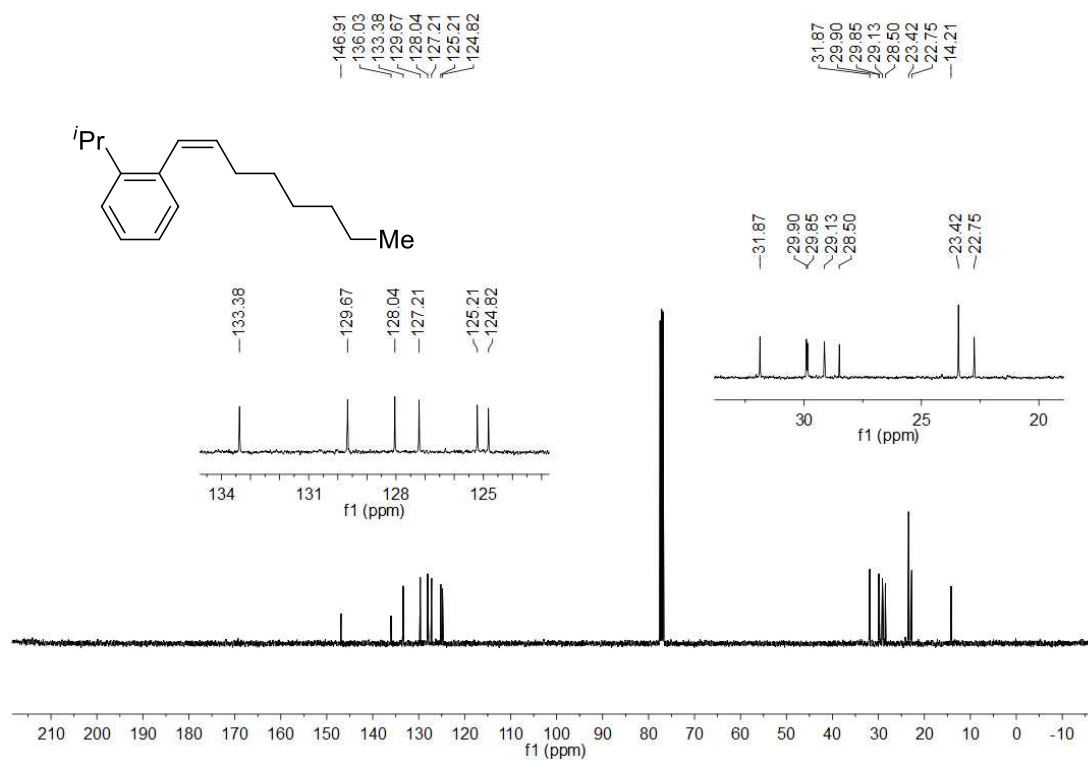

**Supplementary Figure S132.** <sup>13</sup>C NMR spectrum for compound Z-3at (100 MHz, CDCl<sub>3</sub>, 25 °C).

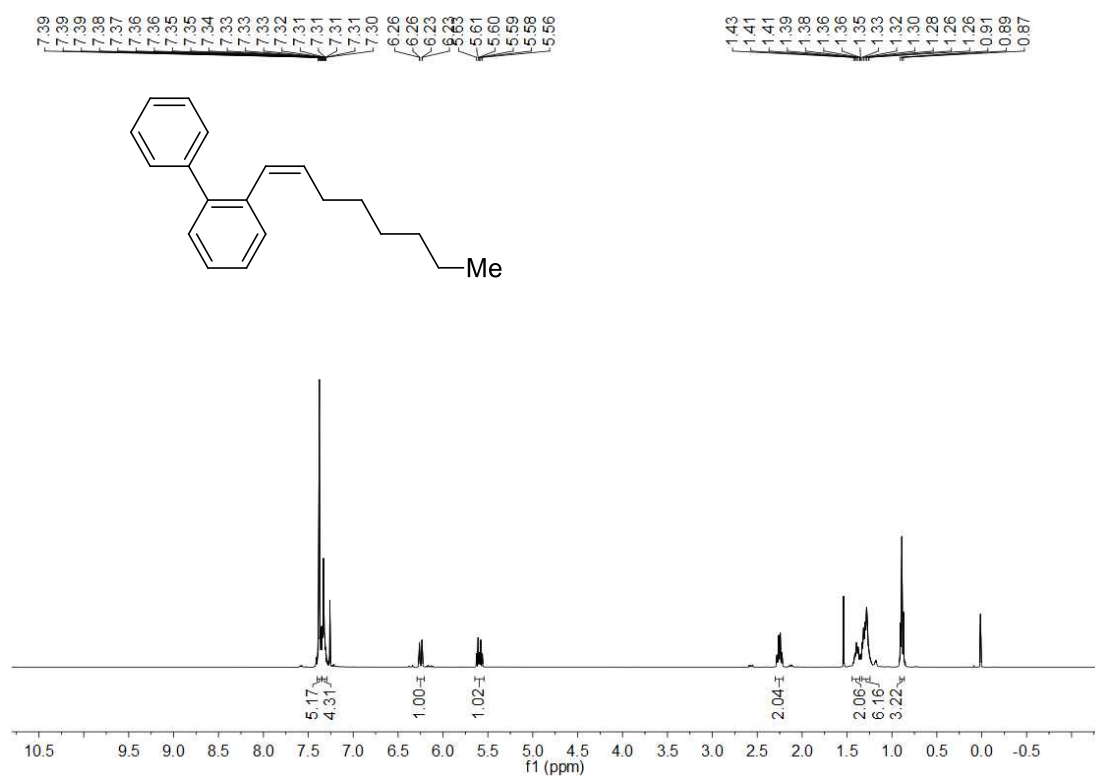

**Supplementary Figure S133.** <sup>1</sup>H NMR spectrum for compound Z-3au (400 MHz, CDCl<sub>3</sub>, 25 °C).

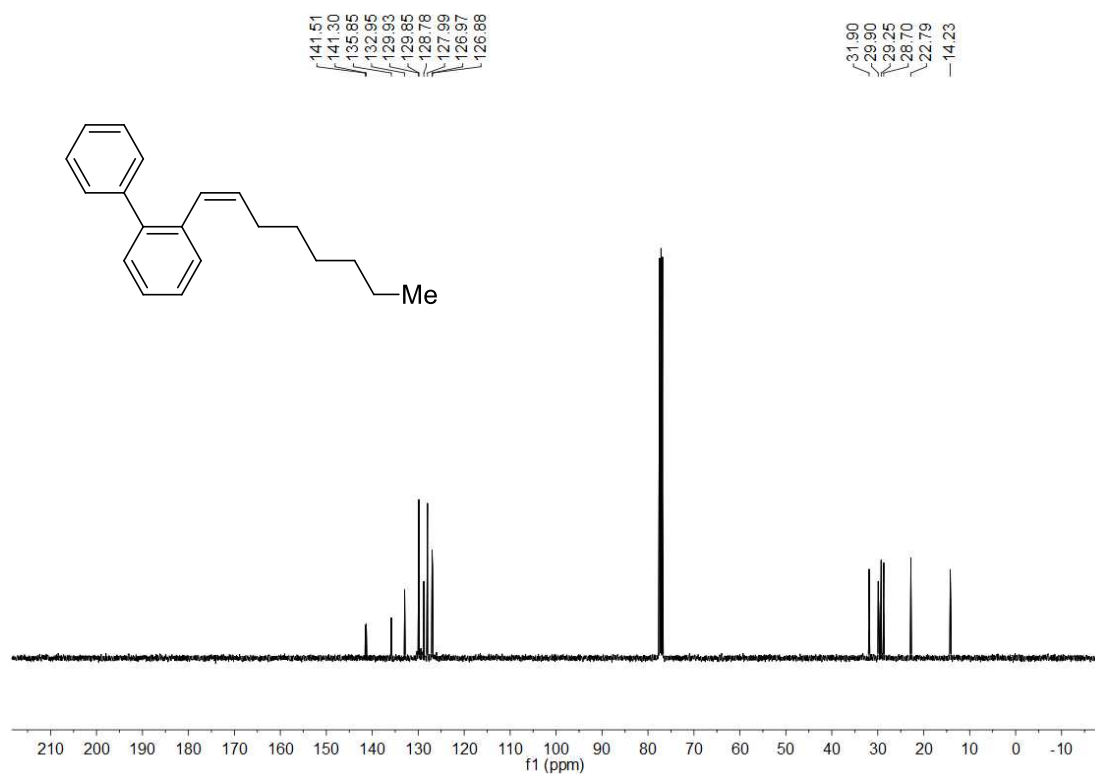

**Supplementary Figure S134.** <sup>13</sup>C NMR spectrum for compound Z-3au (100 MHz, CDCl<sub>3</sub>, 25 °C).



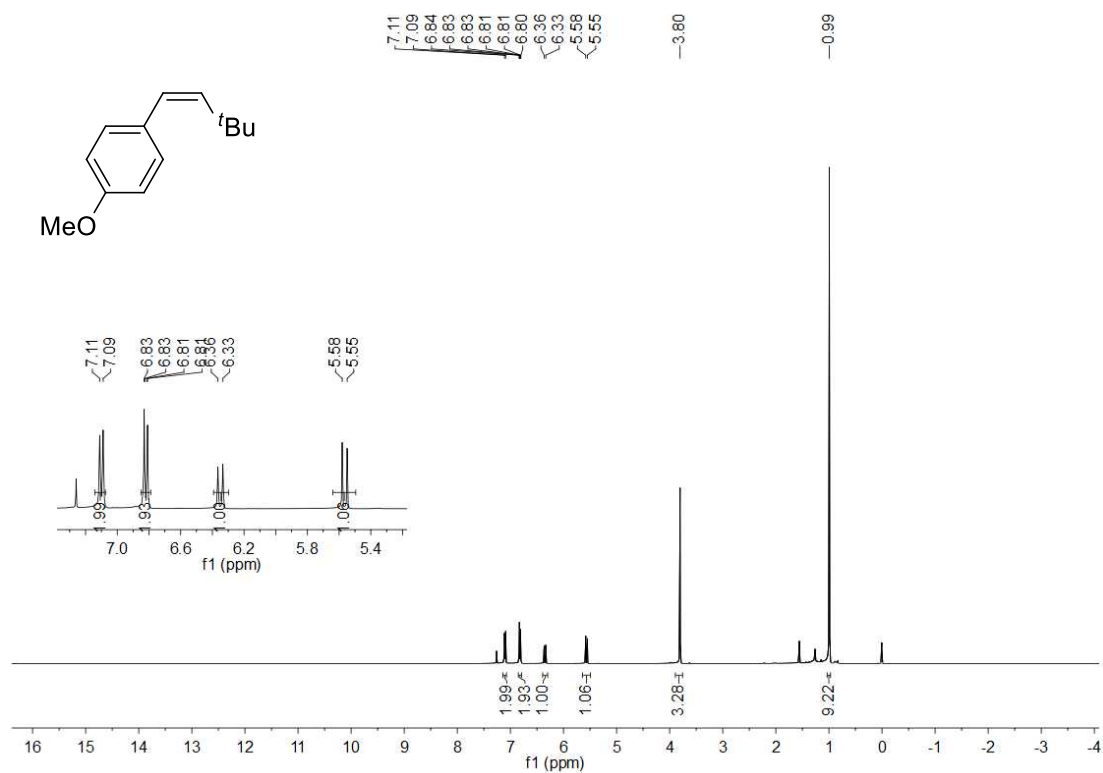

**Supplementary Figure S135.** <sup>1</sup>H NMR spectrum for compound Z-3av (400 MHz, CDCl<sub>3</sub>, 25 °C).

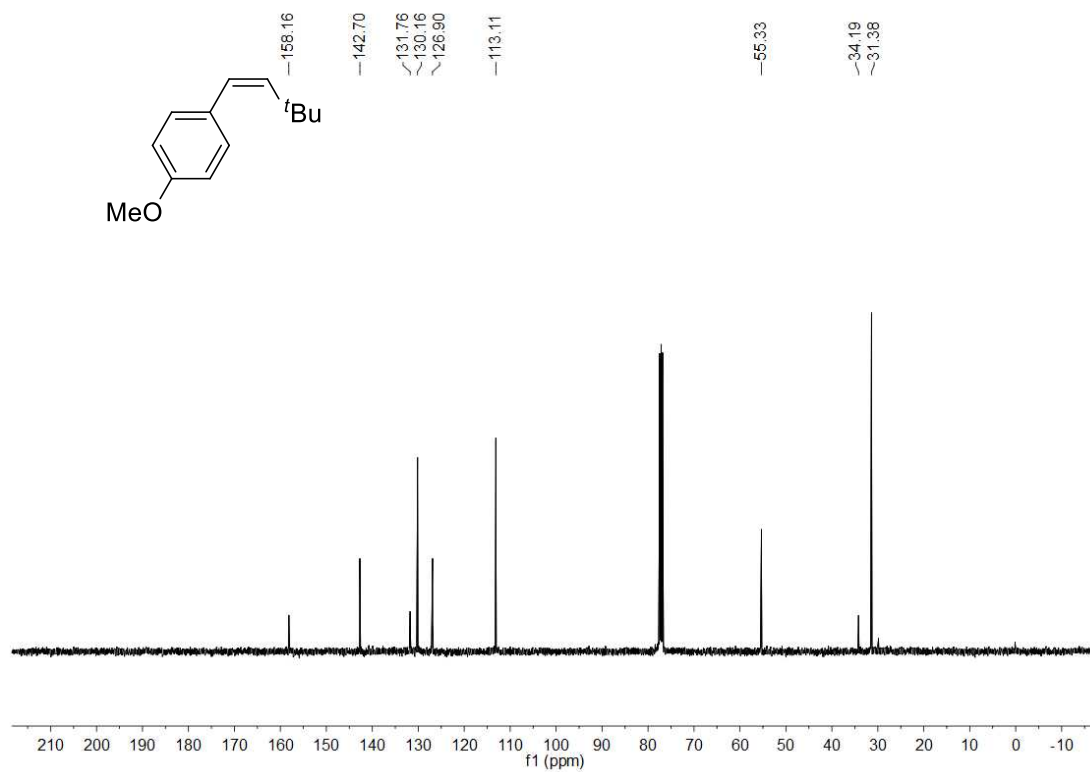

**Supplementary Figure S136.** <sup>13</sup>C NMR spectrum for compound Z-3av (100 MHz, CDCl<sub>3</sub>, 25 °C).

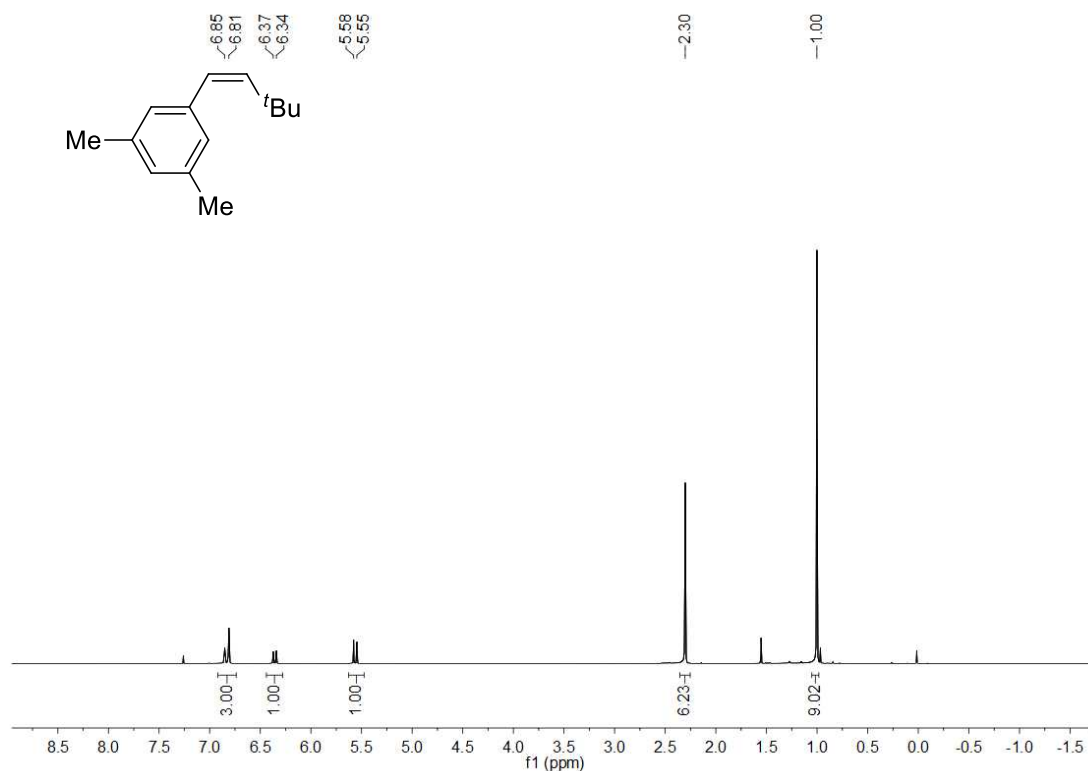

**Supplementary Figure S137.** <sup>1</sup>H NMR spectrum for compound Z-3aw (400 MHz, CDCl<sub>3</sub>, 25 °C).

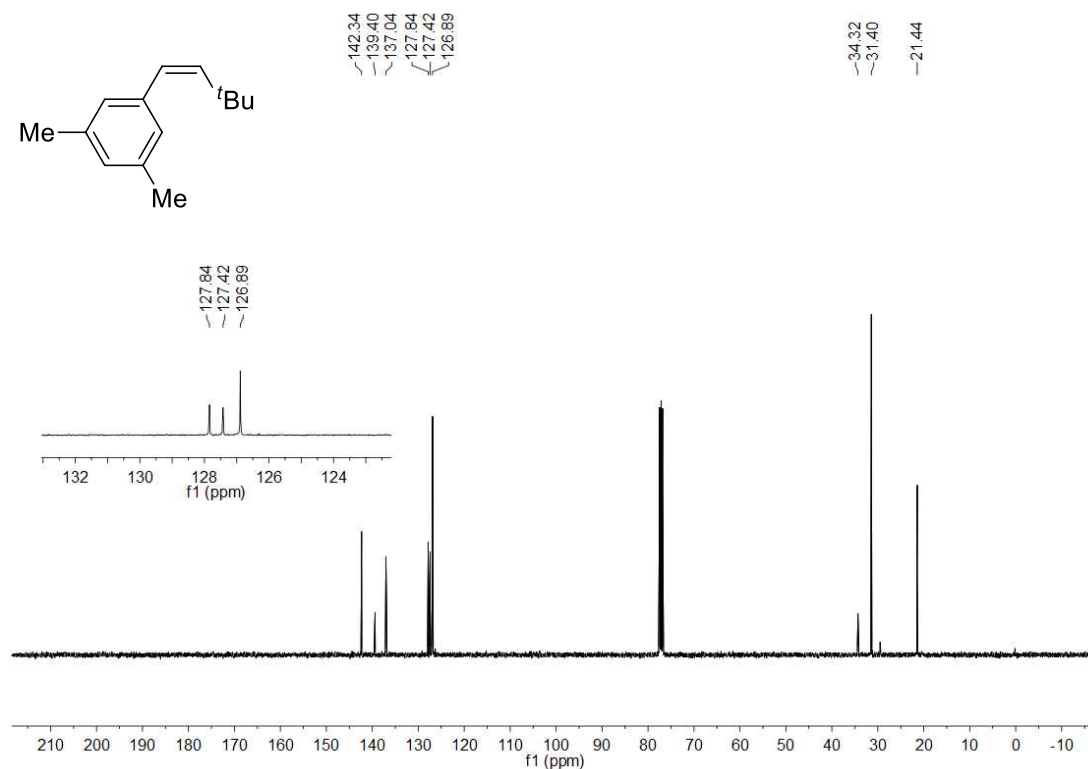

**Supplementary Figure S138.** <sup>13</sup>C NMR spectrum for compound Z-3aw (100 MHz, CDCl<sub>3</sub>, 25 °C).

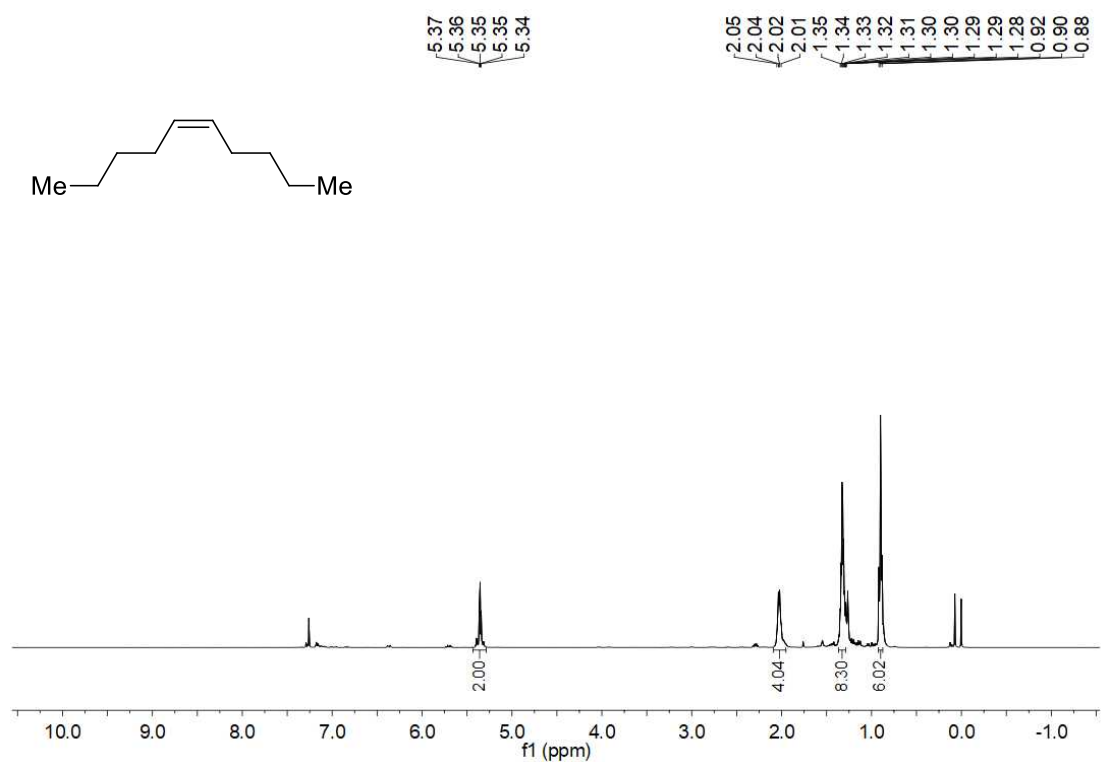

**Supplementary Figure S139.** <sup>1</sup>H NMR spectrum for compound Z-3ax (400 MHz, CDCl<sub>3</sub>, 25 °C).

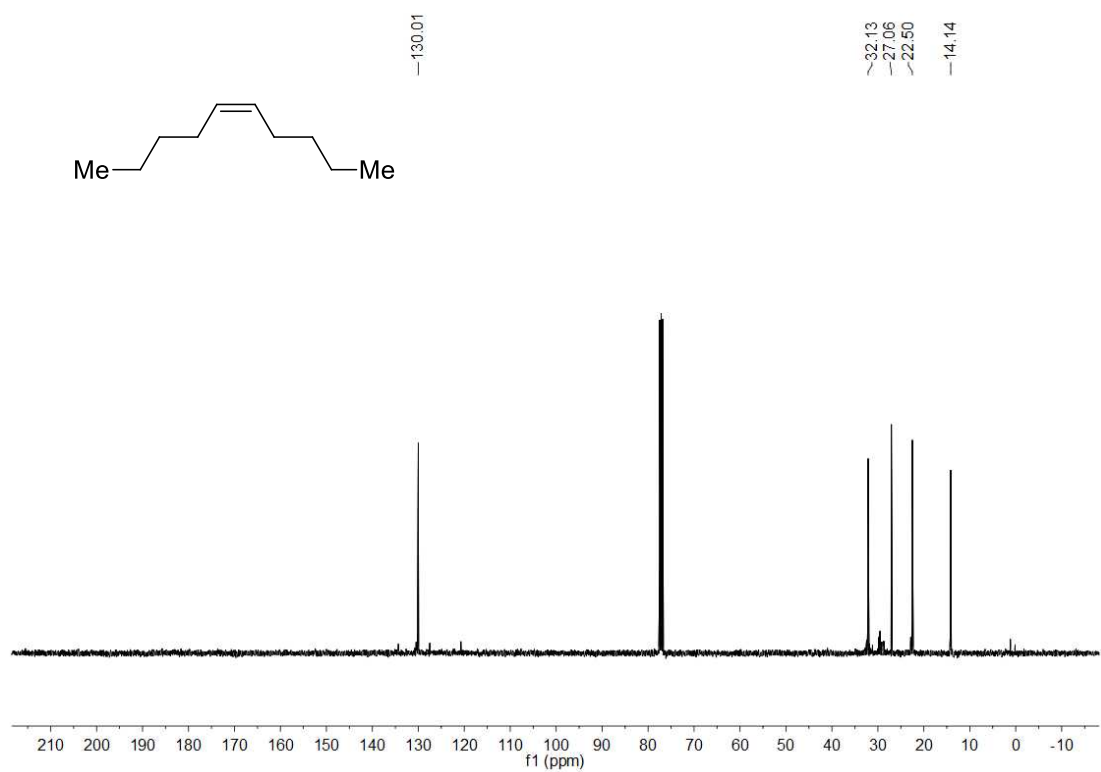

**Supplementary Figure S140.** <sup>13</sup>C NMR spectrum for compound Z-3ax (100 MHz, CDCl<sub>3</sub>, 25 °C).

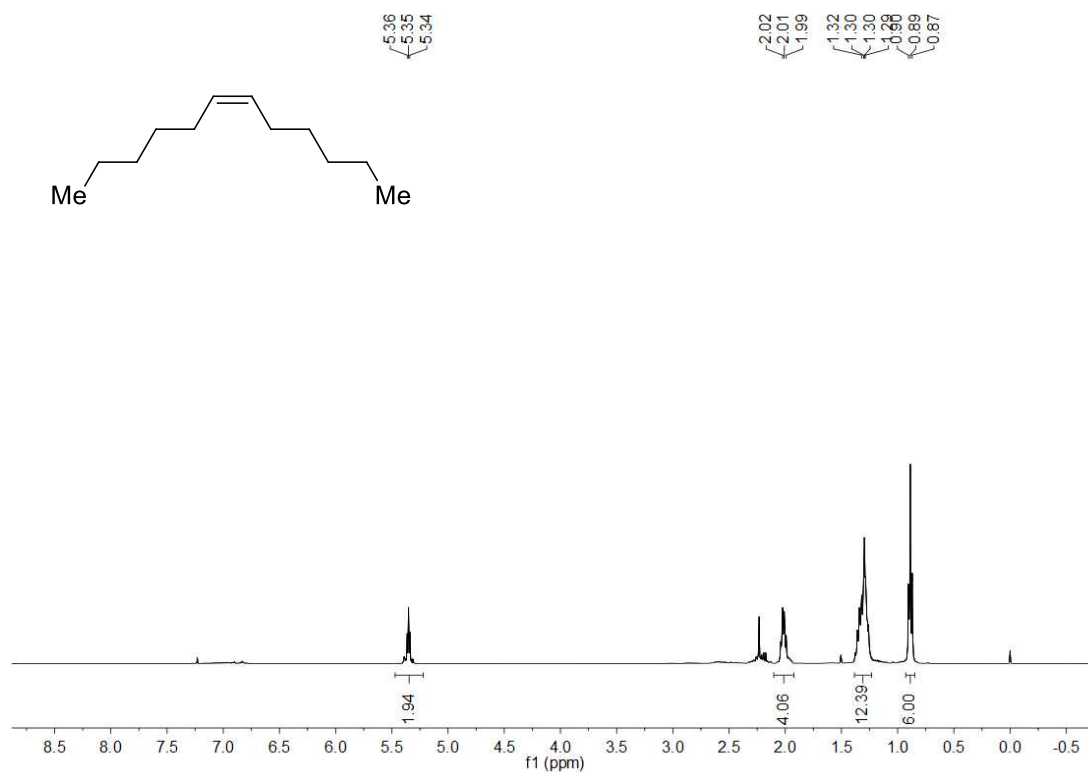

**Supplementary Figure S141.** <sup>1</sup>H NMR spectrum for compound Z-3ay (400 MHz, CDCl<sub>3</sub>, 25 °C).

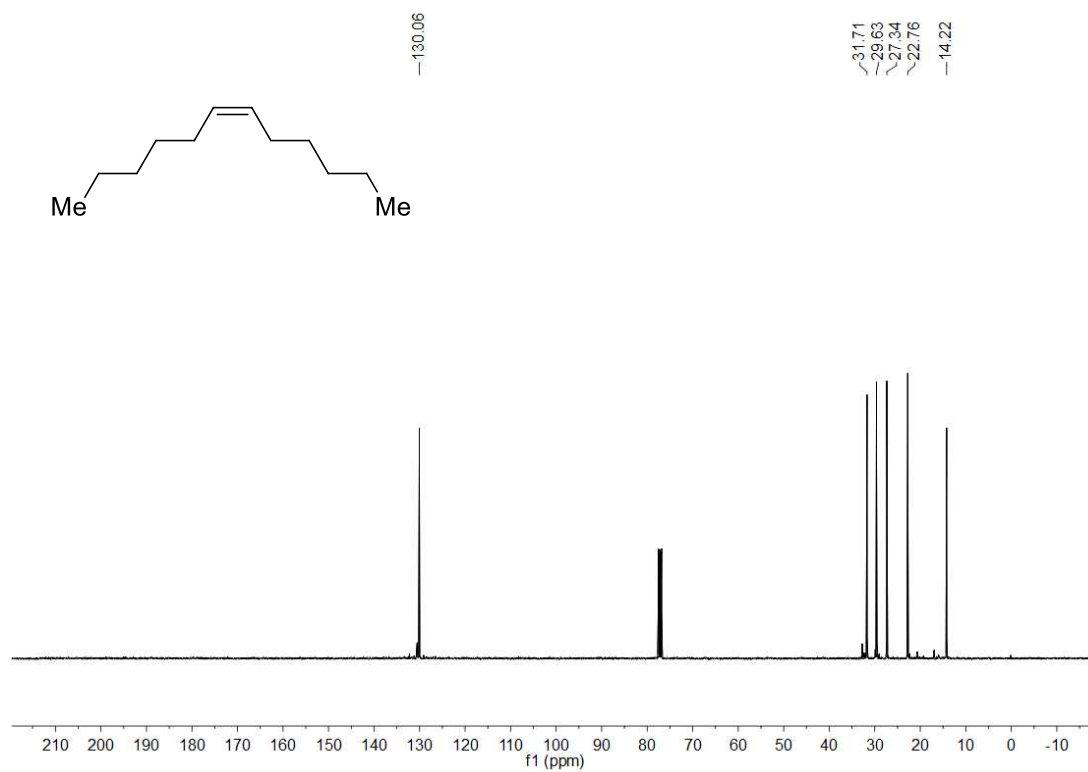

**Supplementary Figure S142.** <sup>13</sup>C NMR spectrum for compound Z-3ay (100 MHz, CDCl<sub>3</sub>, 25 °C).

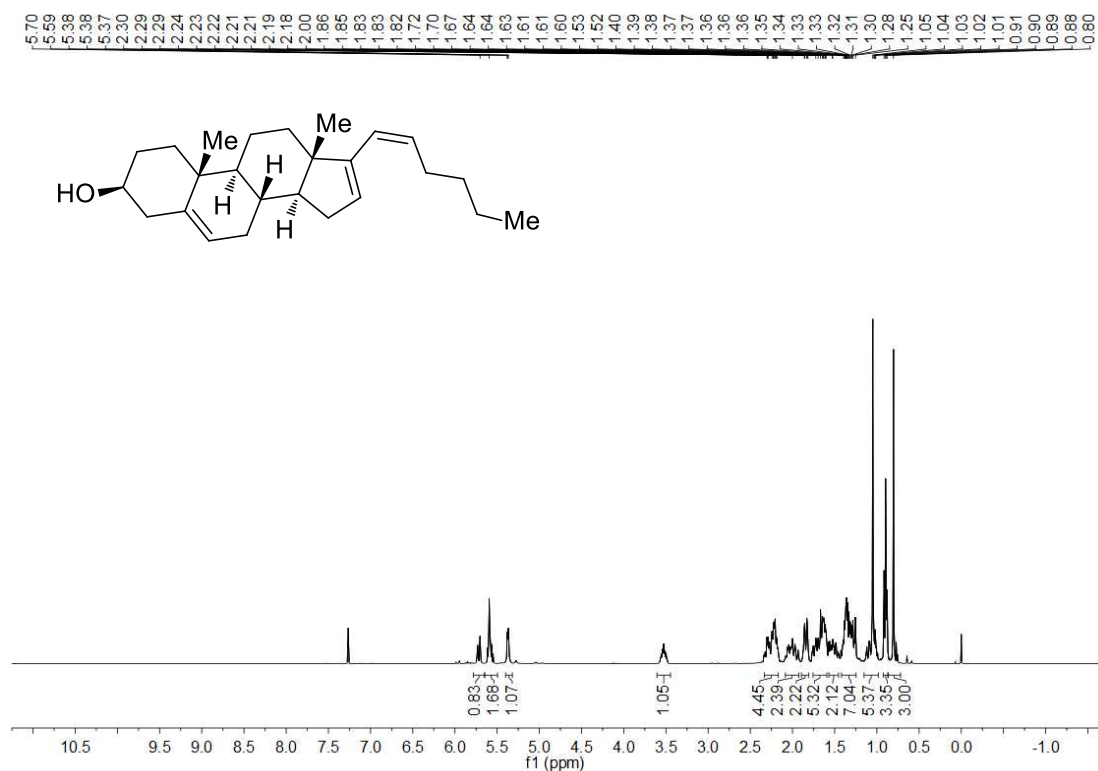

**Supplementary Figure S143.**  $^1\text{H}$  NMR spectrum for compound Z-3az (400 MHz,  $\text{CDCl}_3$ , 25  $^\circ\text{C}$ ).

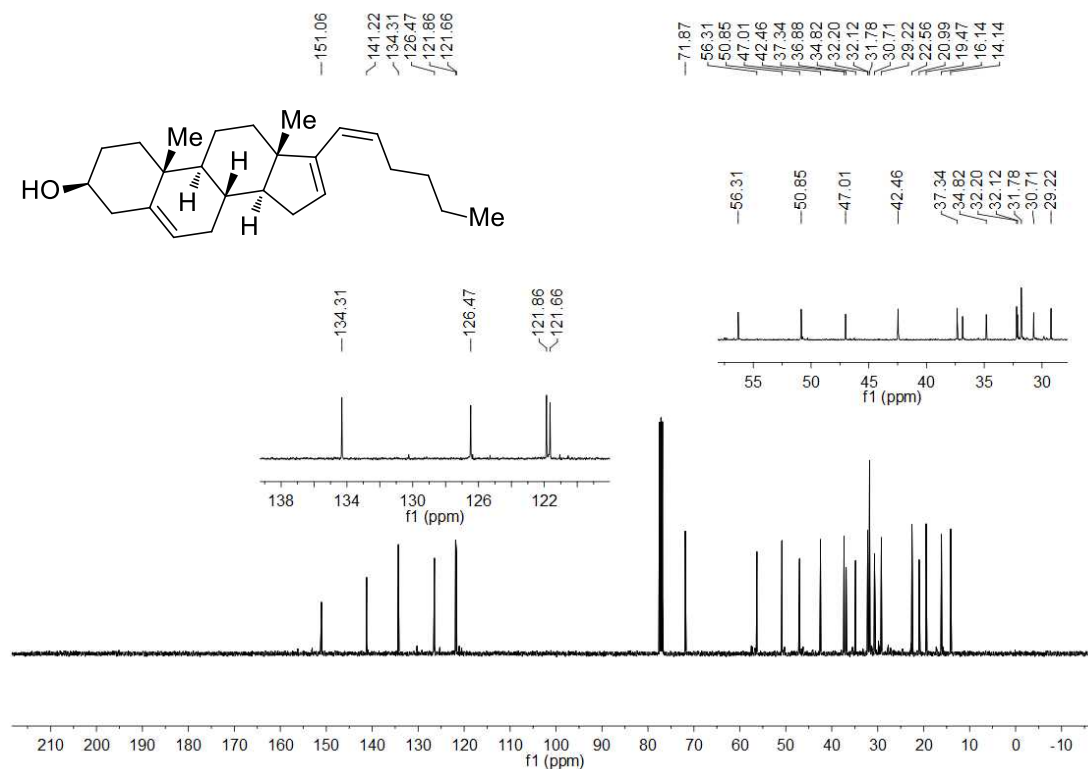

**Supplementary Figure S144.**  $^{13}\text{C}$  NMR spectrum for compound Z-3az (100 MHz,  $\text{CDCl}_3$ , 25  $^\circ\text{C}$ ).

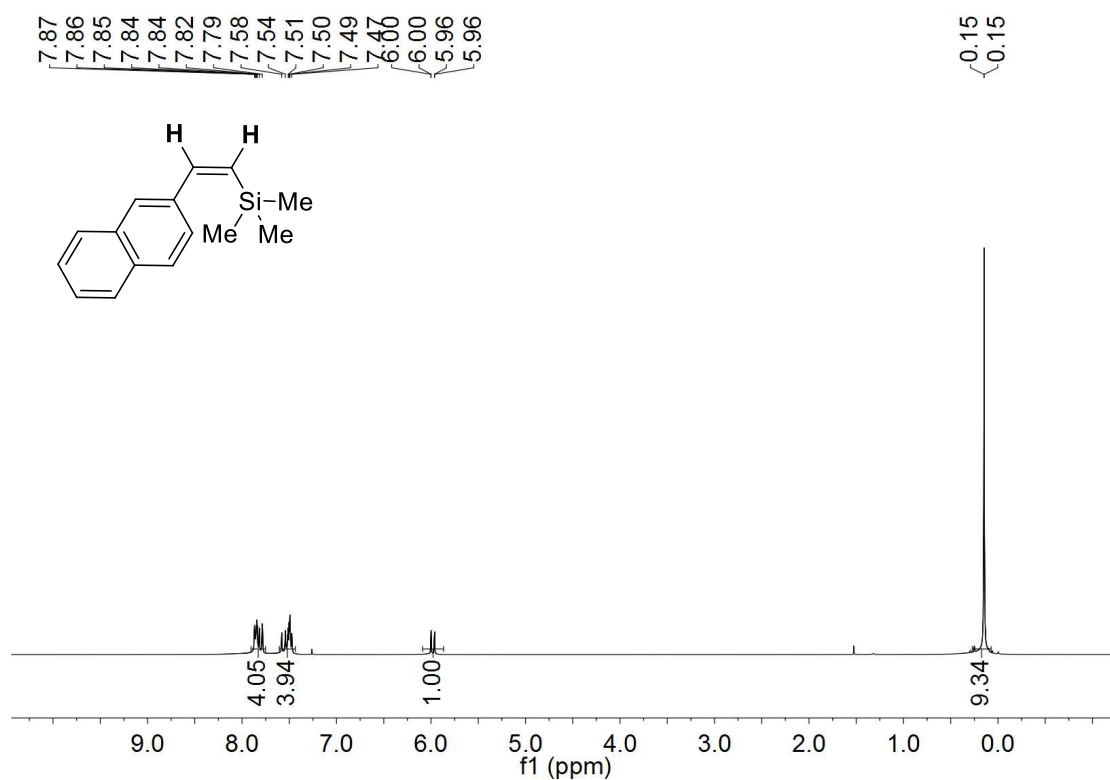

**Supplementary Figure S145.** <sup>1</sup>H NMR spectrum for compound Z-3ba (400 MHz, CDCl<sub>3</sub>, 25 °C).

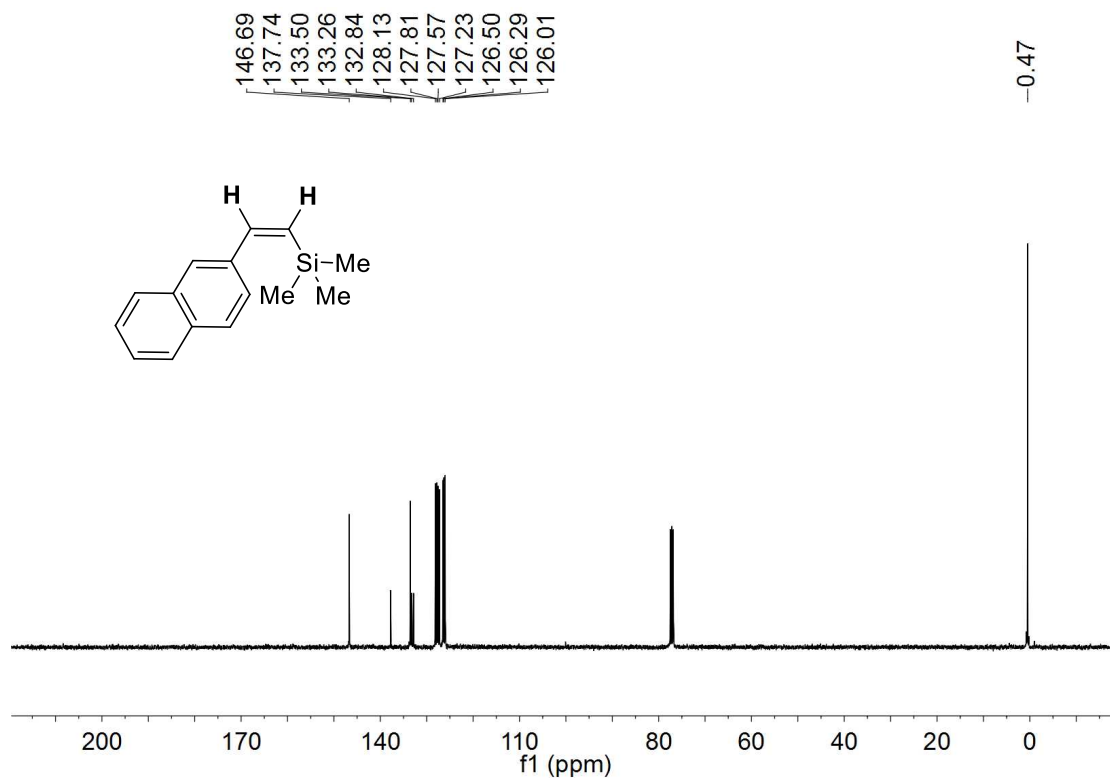

**Supplementary Figure S146.** <sup>13</sup>C NMR spectrum for compound Z-3ba (100 MHz, CDCl<sub>3</sub>, 25 °C).

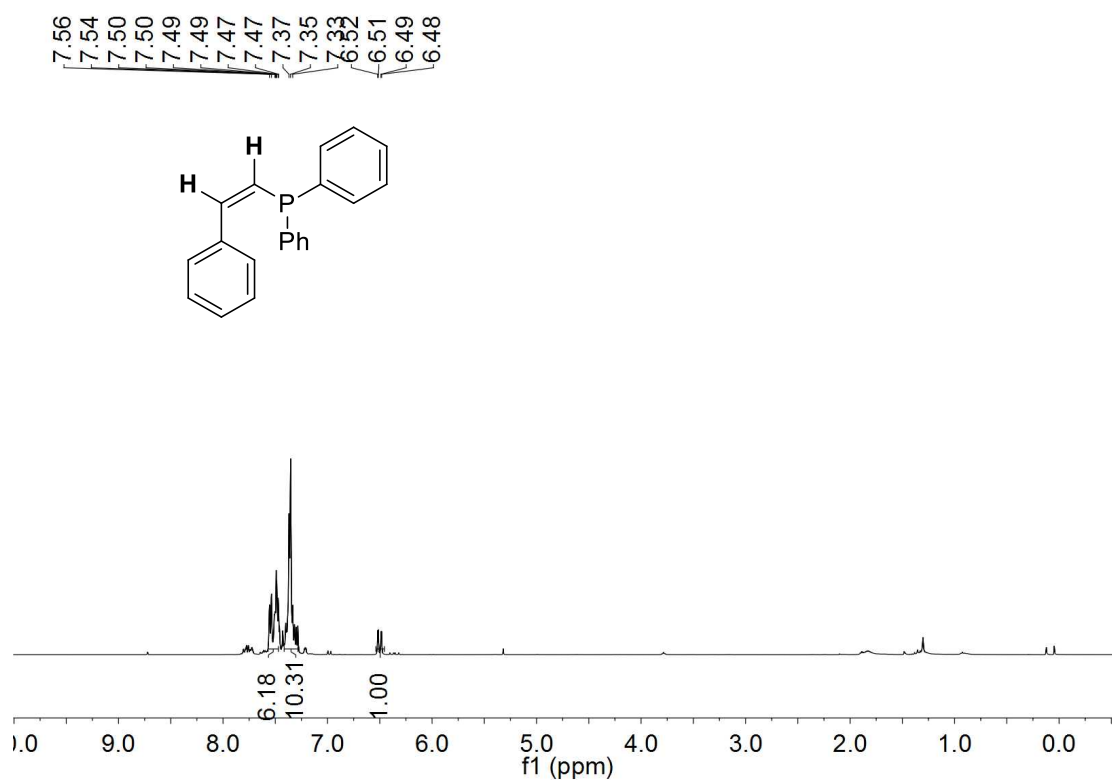

Supplementary Figure S147. <sup>1</sup>H NMR spectrum for compound Z-3bb (400 MHz, CDCl<sub>3</sub>, 25 °C).

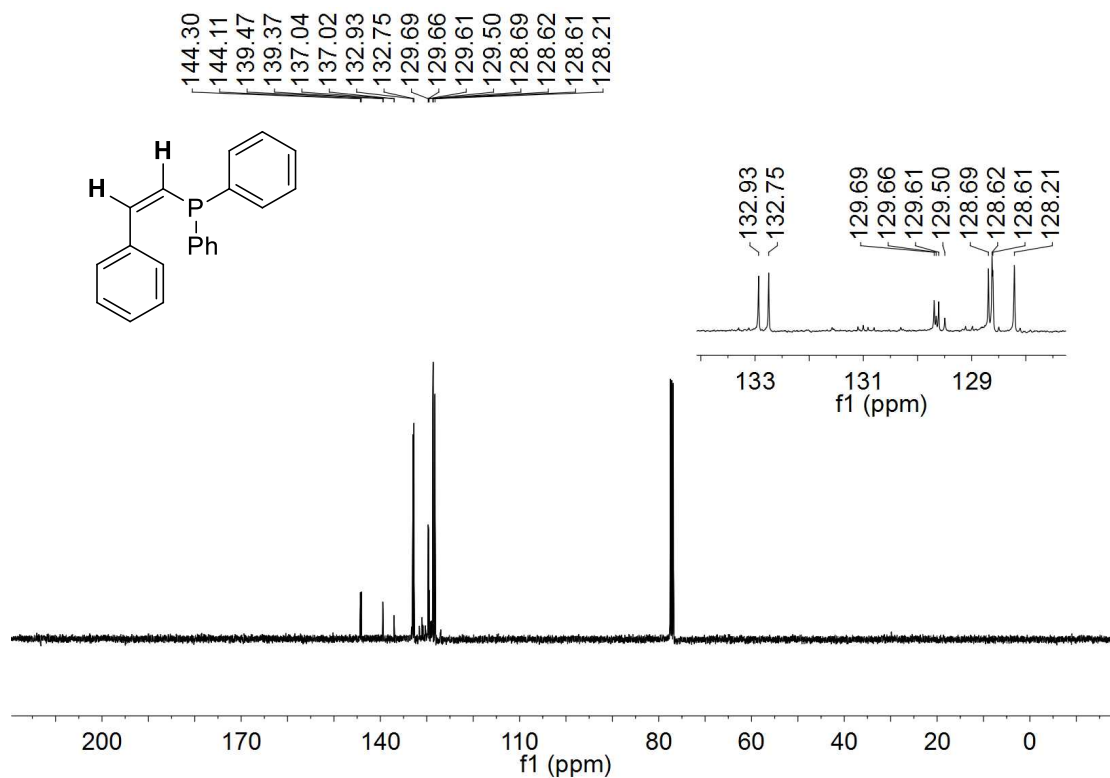

Supplementary Figure S148. <sup>13</sup>C NMR spectrum for compound Z-3bb (100 MHz, CDCl<sub>3</sub>, 25 °C).

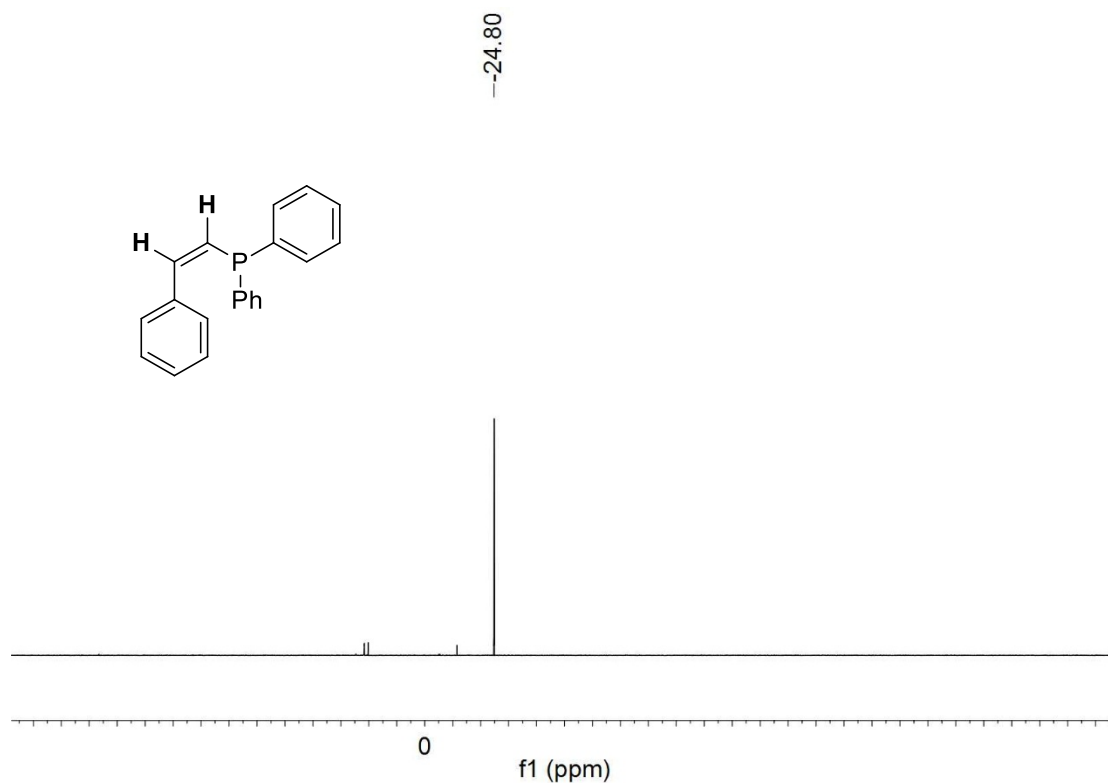

Supplementary Figure S149.  $^{31}\text{P}$  NMR spectrum for compound Z-3bb (162 MHz,  $\text{CDCl}_3$ , 25 °C).

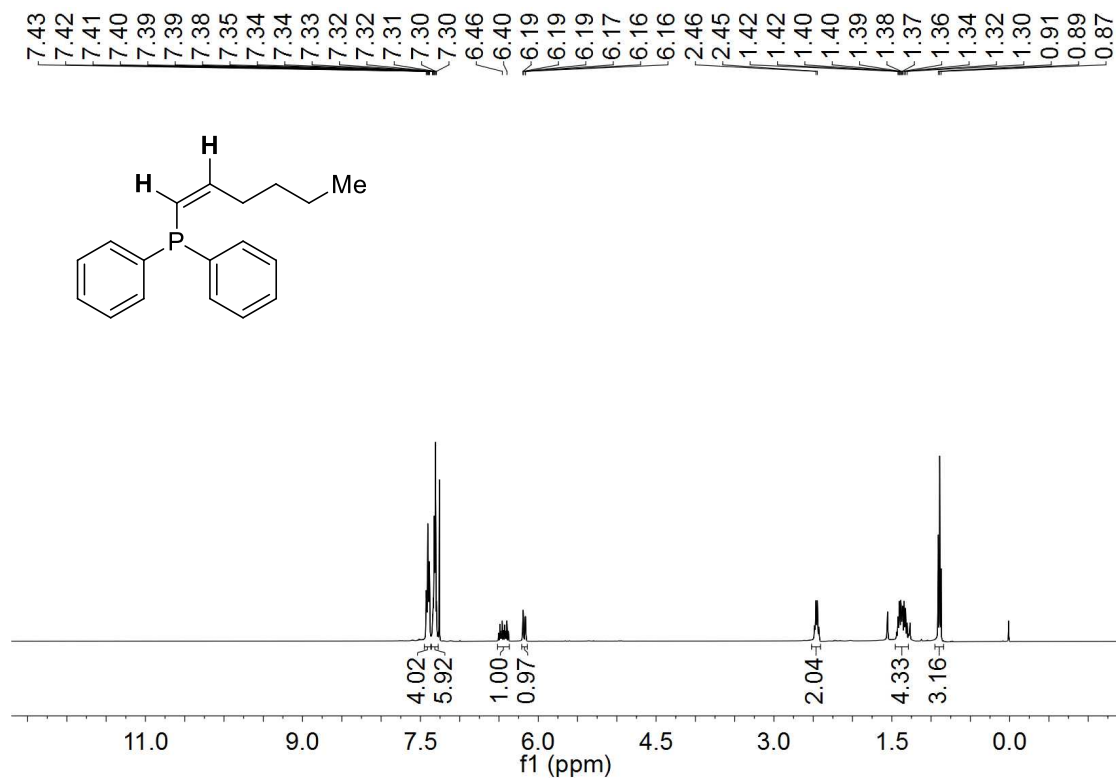

Supplementary Figure S150.  $^1\text{H}$  NMR spectrum for compound Z-3bc (400 MHz,  $\text{CDCl}_3$ , 25 °C).



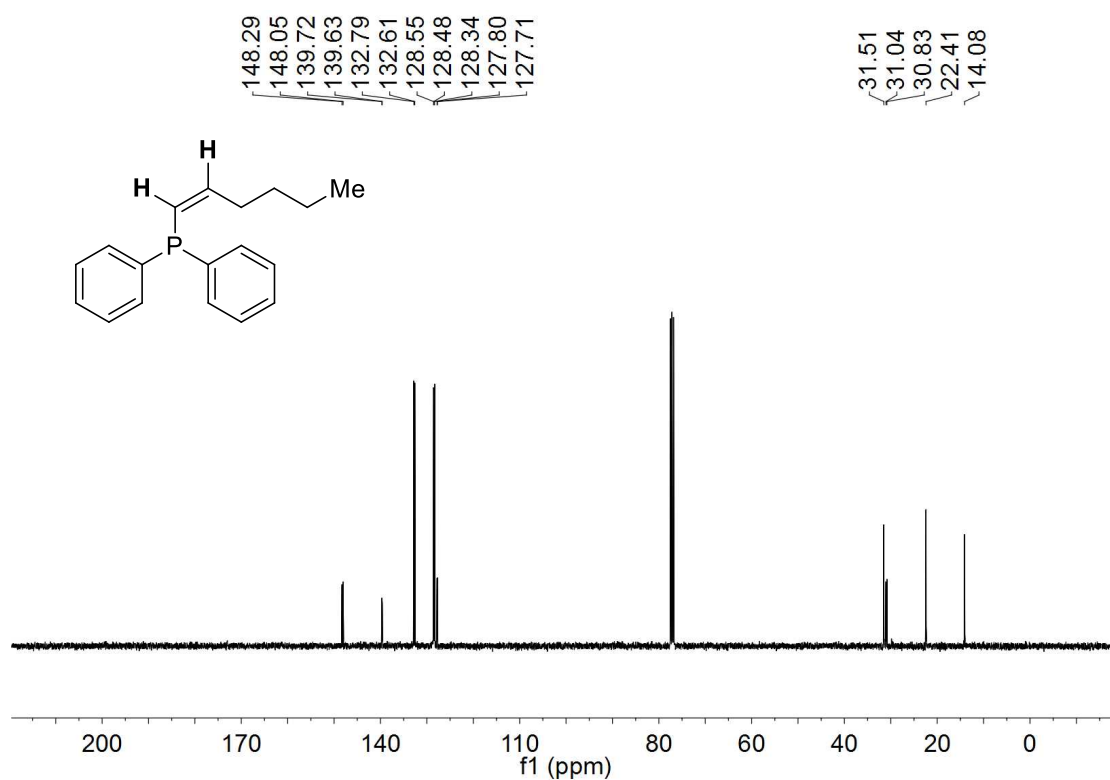

Supplementary Figure S151. <sup>13</sup>C NMR spectrum for compound Z-3bc (100 MHz, CDCl<sub>3</sub>, 25 °C).

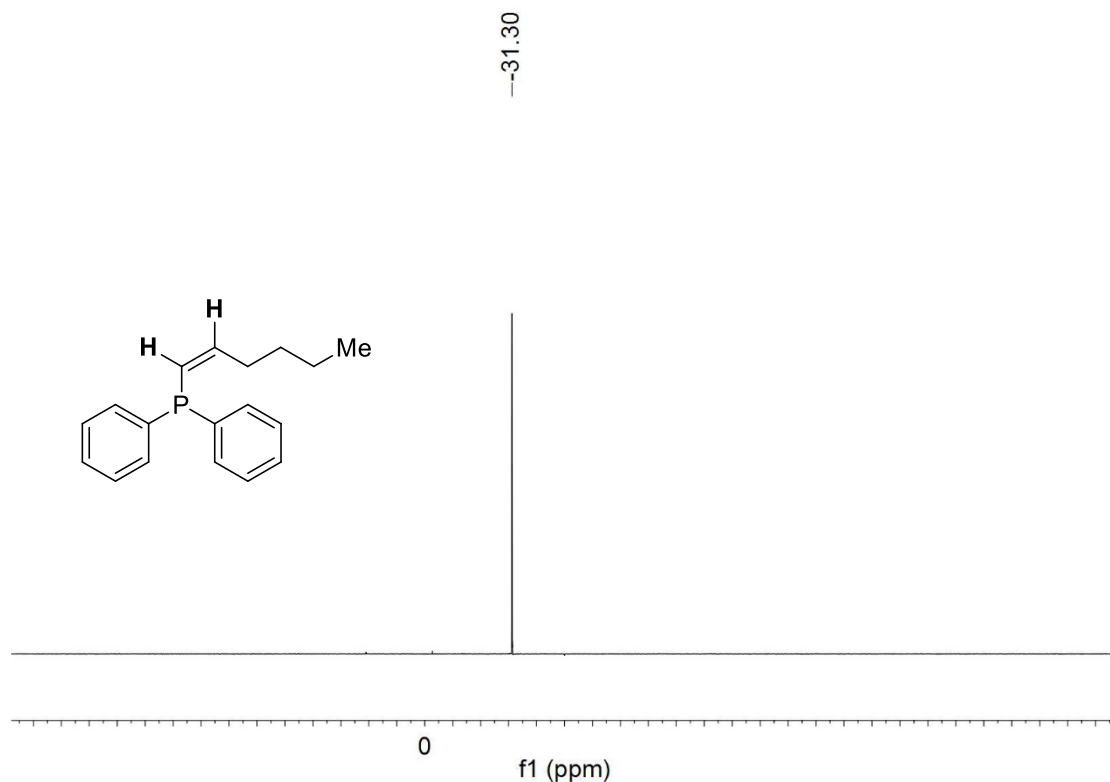

Supplementary Figure S152. <sup>31</sup>P NMR spectrum for compound Z-3bc (162 MHz, CDCl<sub>3</sub>, 25 °C).

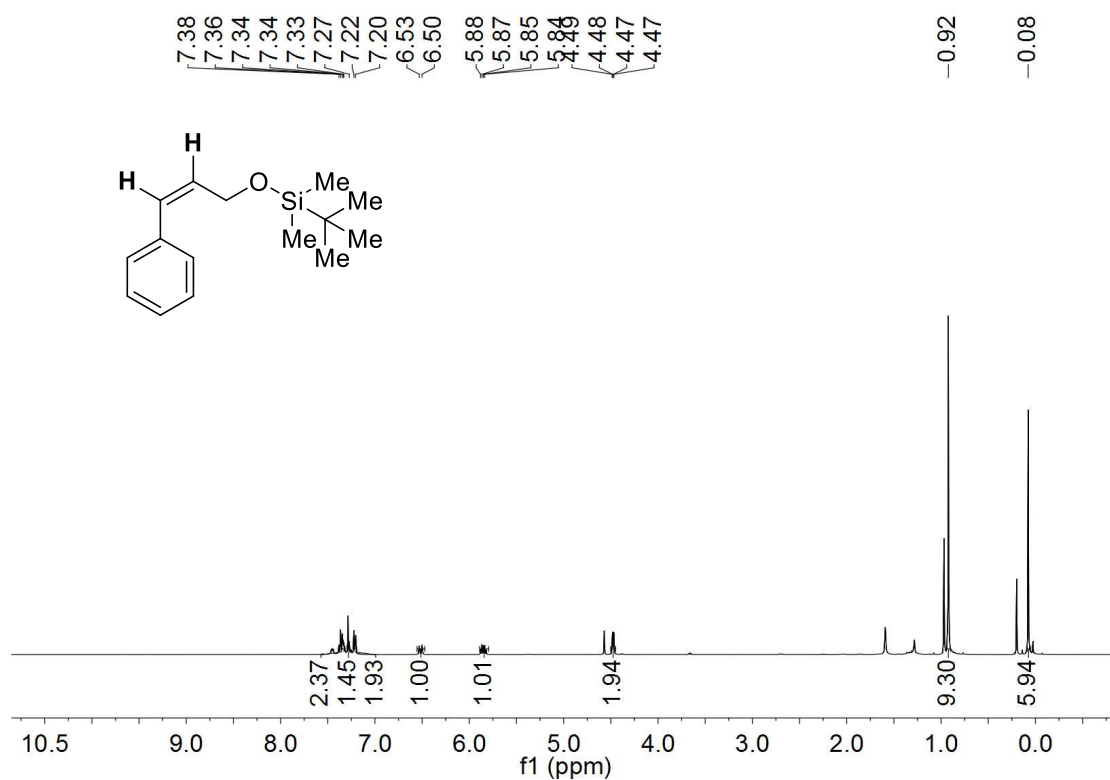

**Supplementary Figure S153.** <sup>1</sup>H NMR spectrum for compound Z-3bd (400 MHz, CDCl<sub>3</sub>, 25 °C).

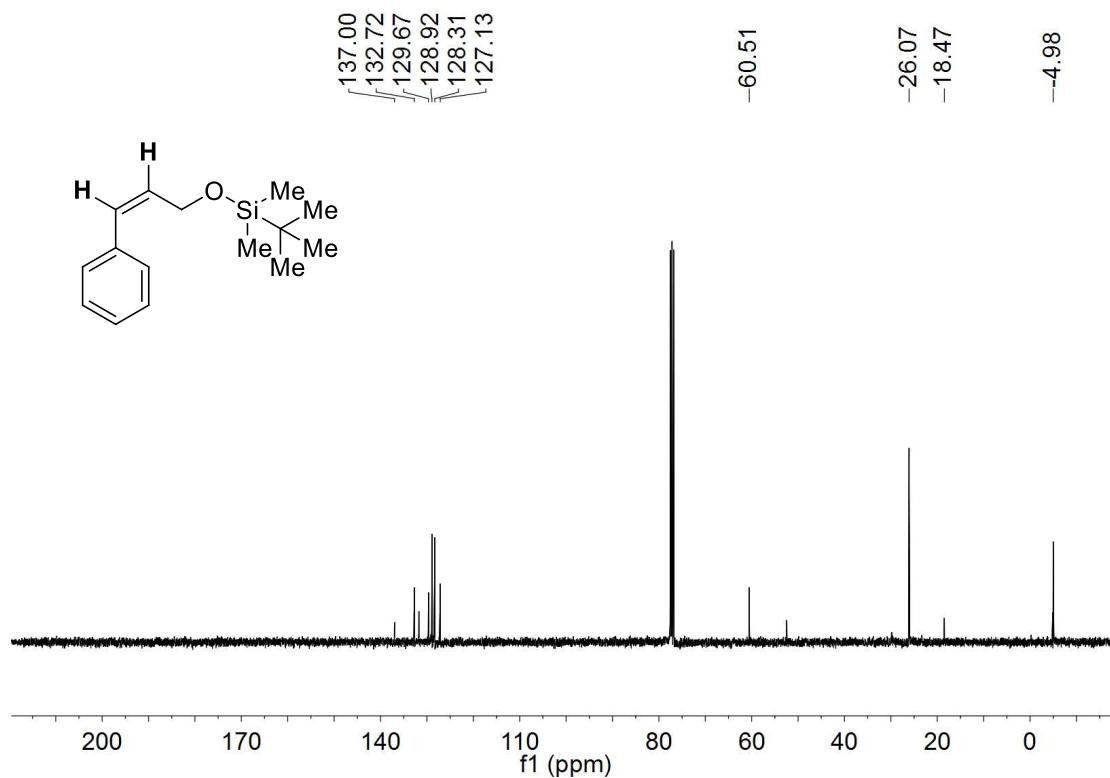

**Supplementary Figure S154.** <sup>13</sup>C NMR spectrum for compound Z-3bd (100 MHz, CDCl<sub>3</sub>, 25 °C).

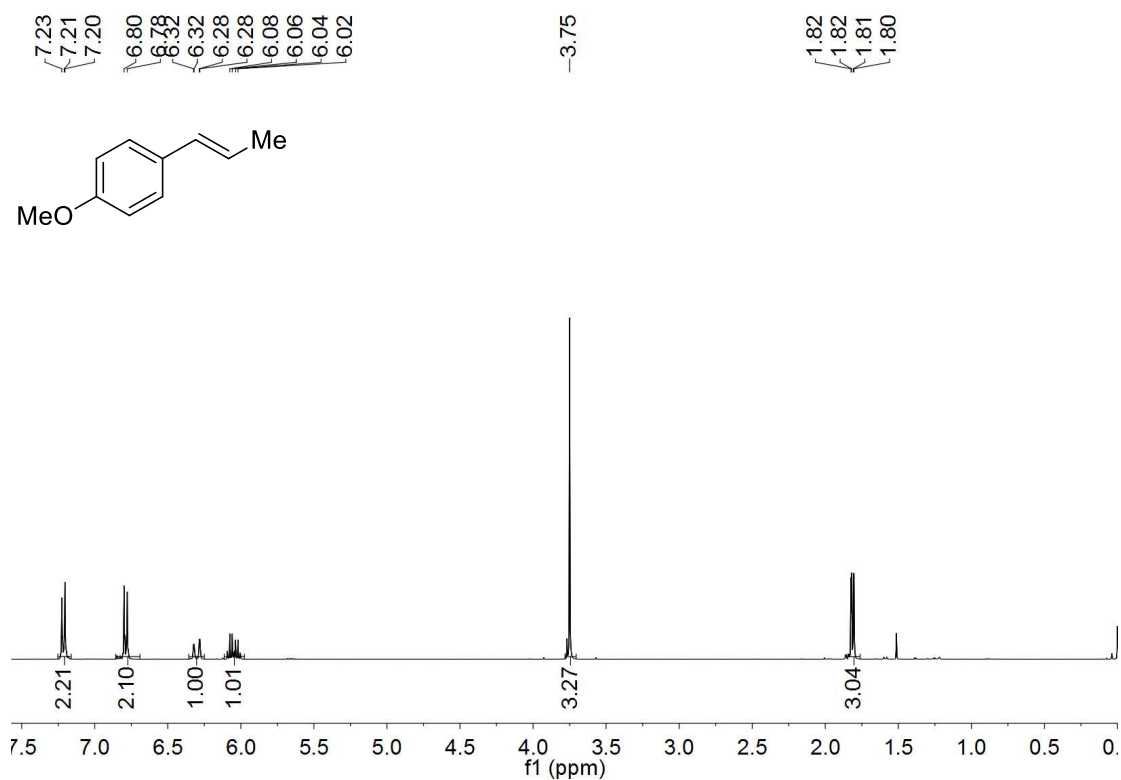

**Supplementary Figure S155. <sup>1</sup>H NMR spectrum for compound *E*-5 (400 MHz, CDCl<sub>3</sub>, 25 °C).**

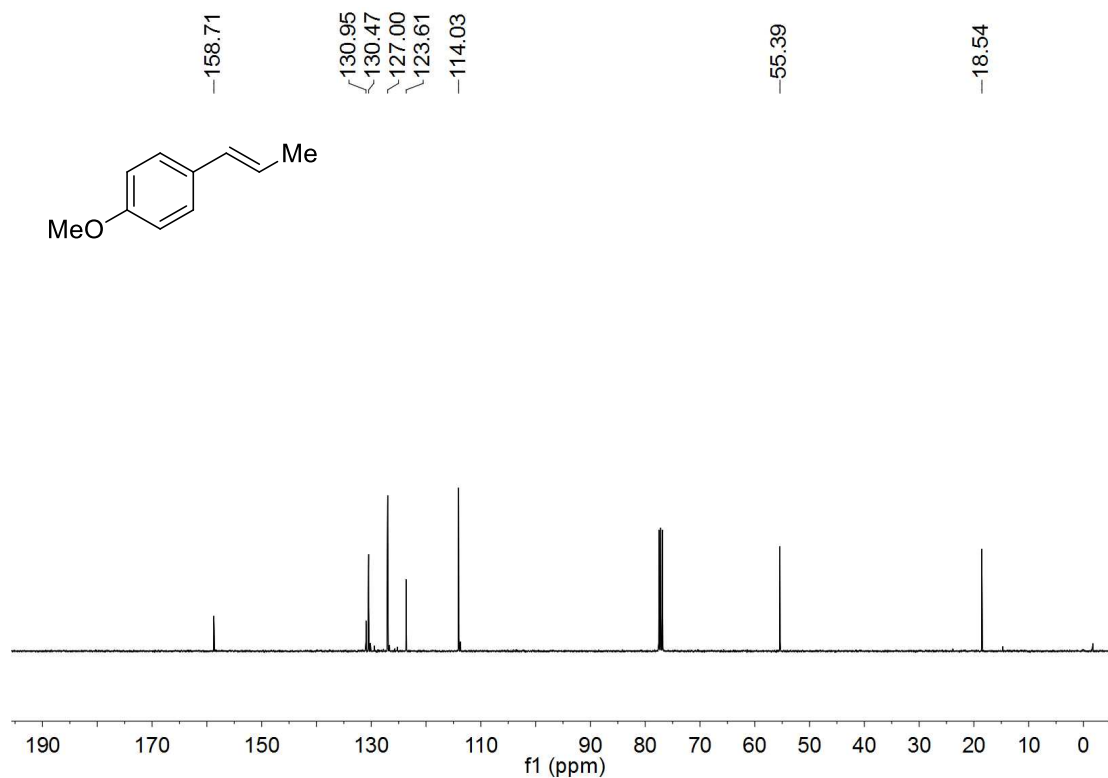

**Supplementary Figure S156. <sup>13</sup>C NMR spectrum for compound *E*-5 (100 MHz, CDCl<sub>3</sub>, 25 °C).**

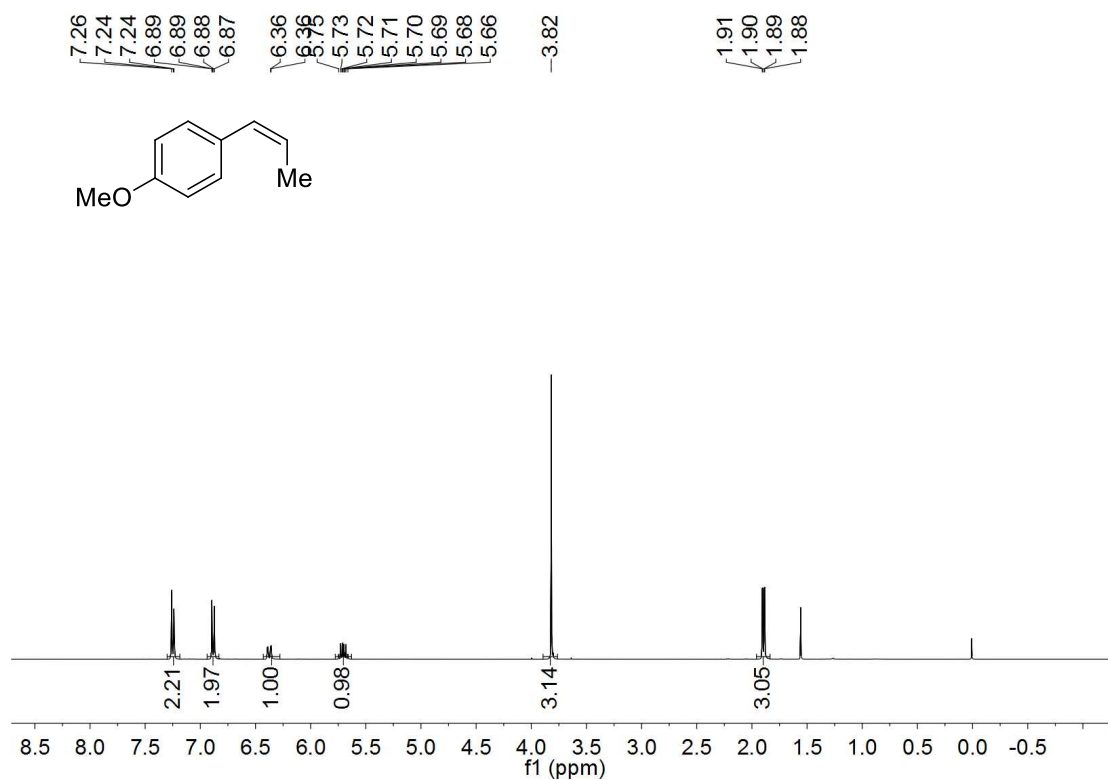

**Supplementary Figure S157.** <sup>1</sup>H NMR spectrum for compound Z-5 (400 MHz, CDCl<sub>3</sub>, 25 °C).

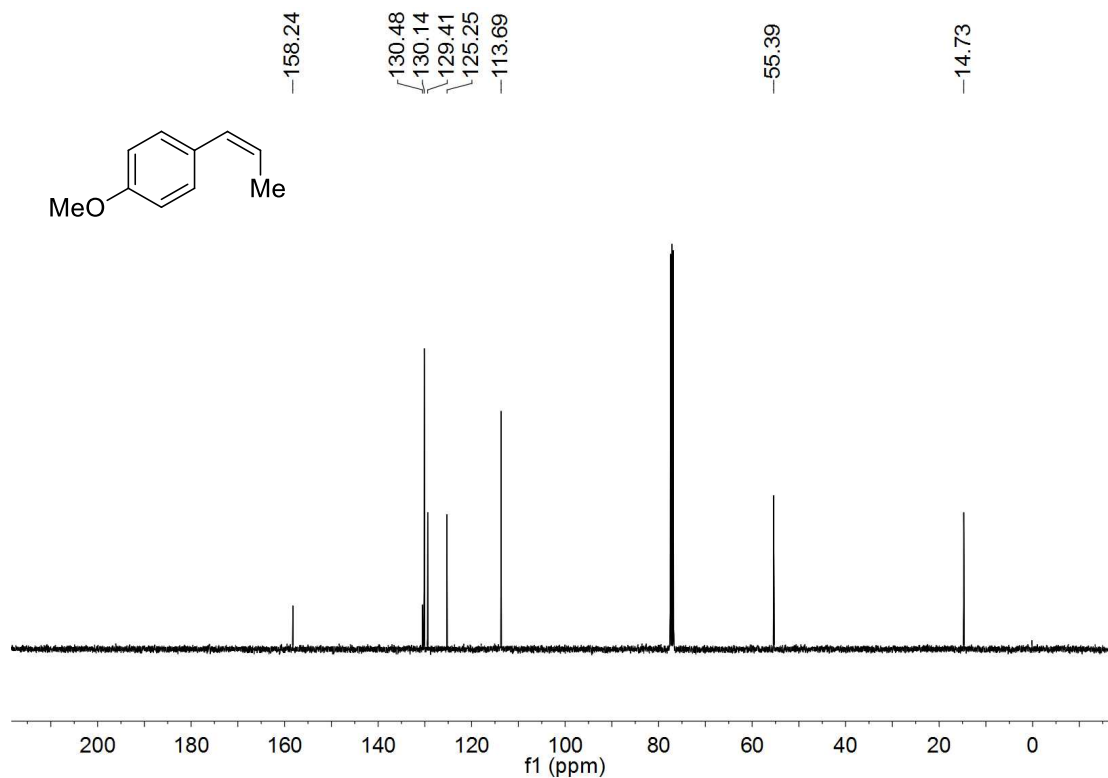

**Supplementary Figure S158.** <sup>13</sup>C NMR spectrum for compound Z-5 (100 MHz, CDCl<sub>3</sub>, 25 °C).

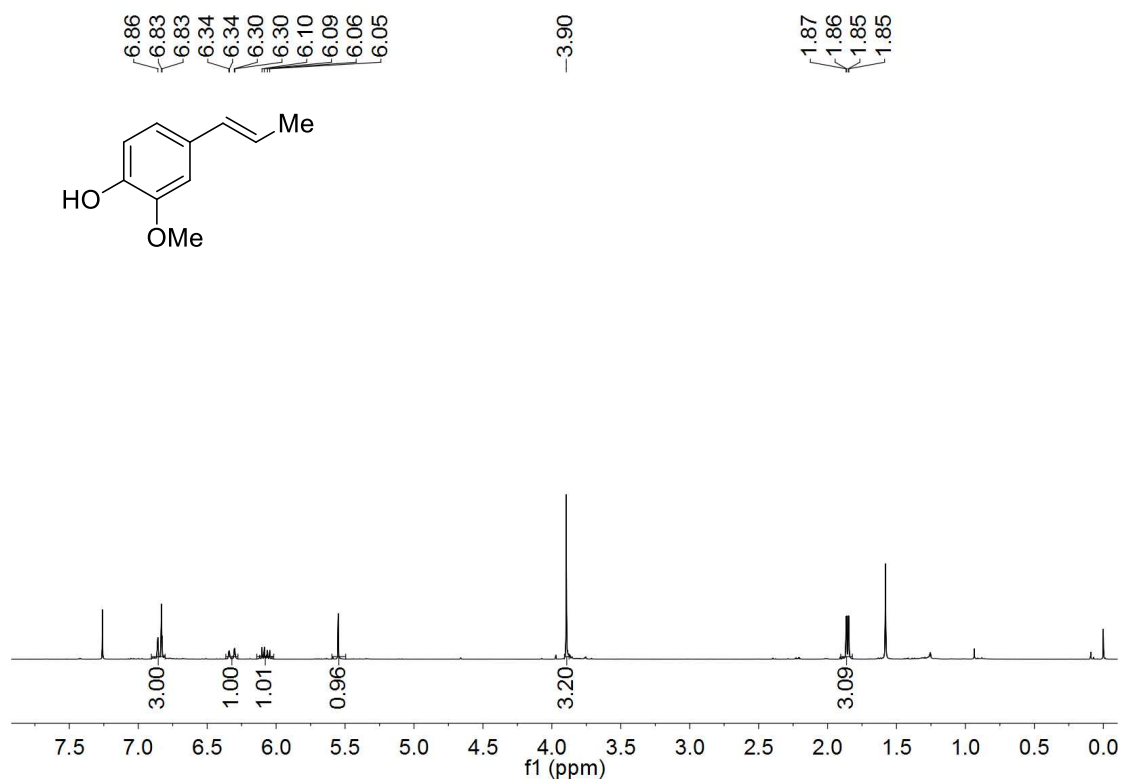

**Supplementary Figure S159.** <sup>1</sup>H NMR spectrum for compound *E*-7 (400 MHz, CDCl<sub>3</sub>, 25 °C).

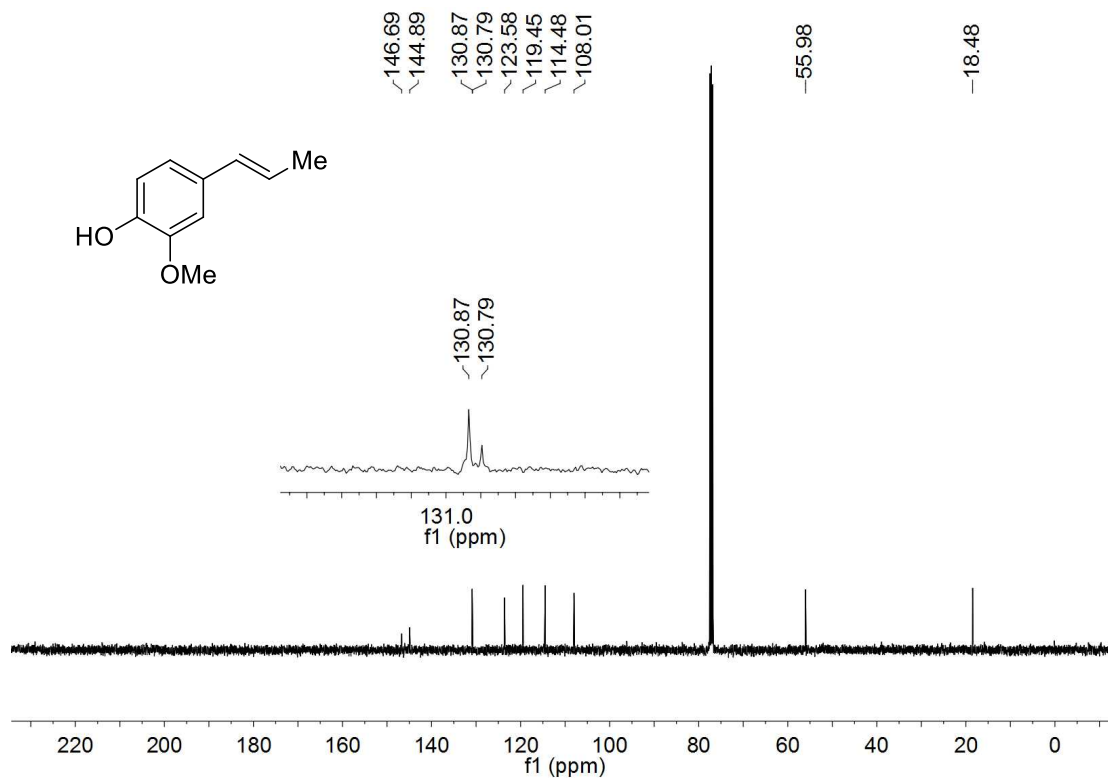

**Supplementary Figure S160.** <sup>13</sup>C NMR spectrum for compound *E*-7 (100 MHz, CDCl<sub>3</sub>, 25 °C).

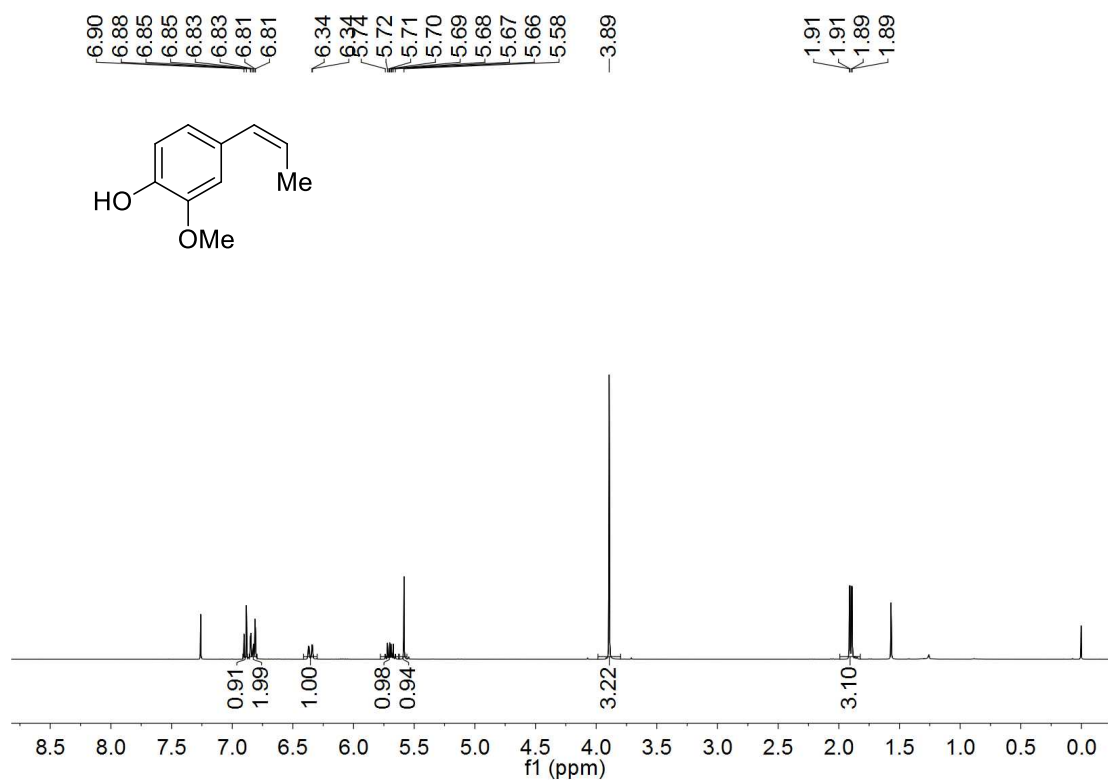

**Supplementary Figure S161. <sup>1</sup>H NMR spectrum for compound Z-7 (400 MHz, CDCl<sub>3</sub>, 25 °C).**

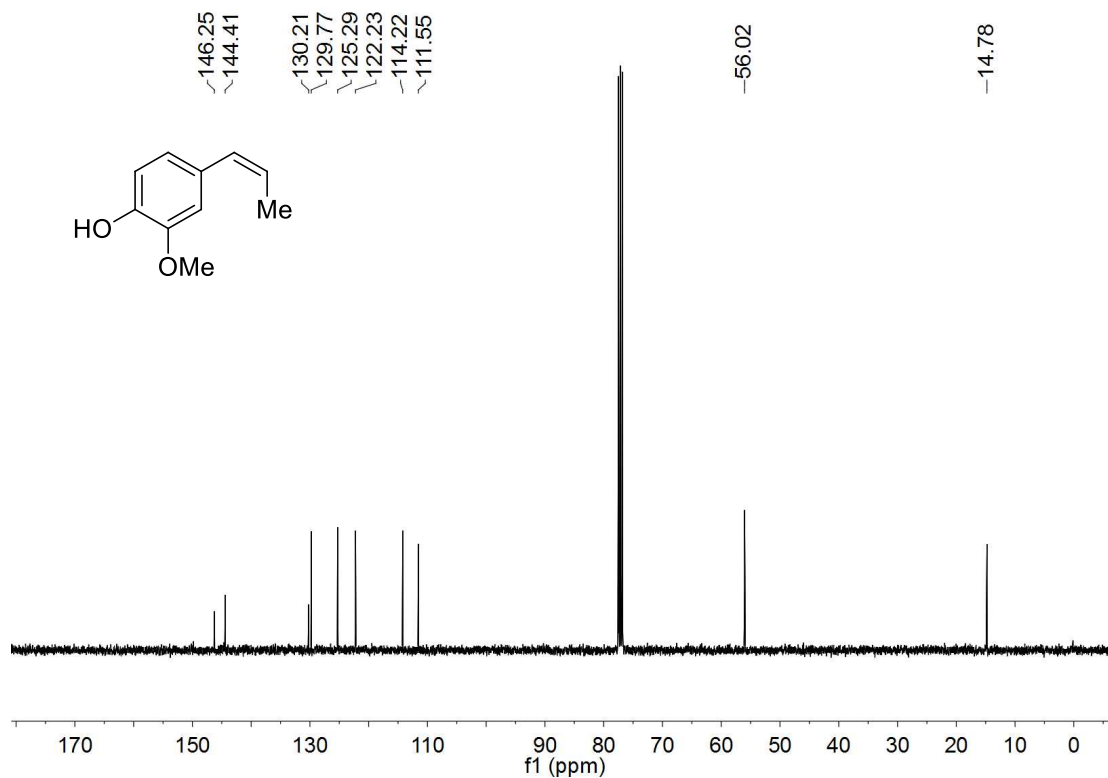

**Supplementary Figure S162. <sup>13</sup>C NMR spectrum for compound Z-7 (100 MHz, CDCl<sub>3</sub>, 25 °C).**

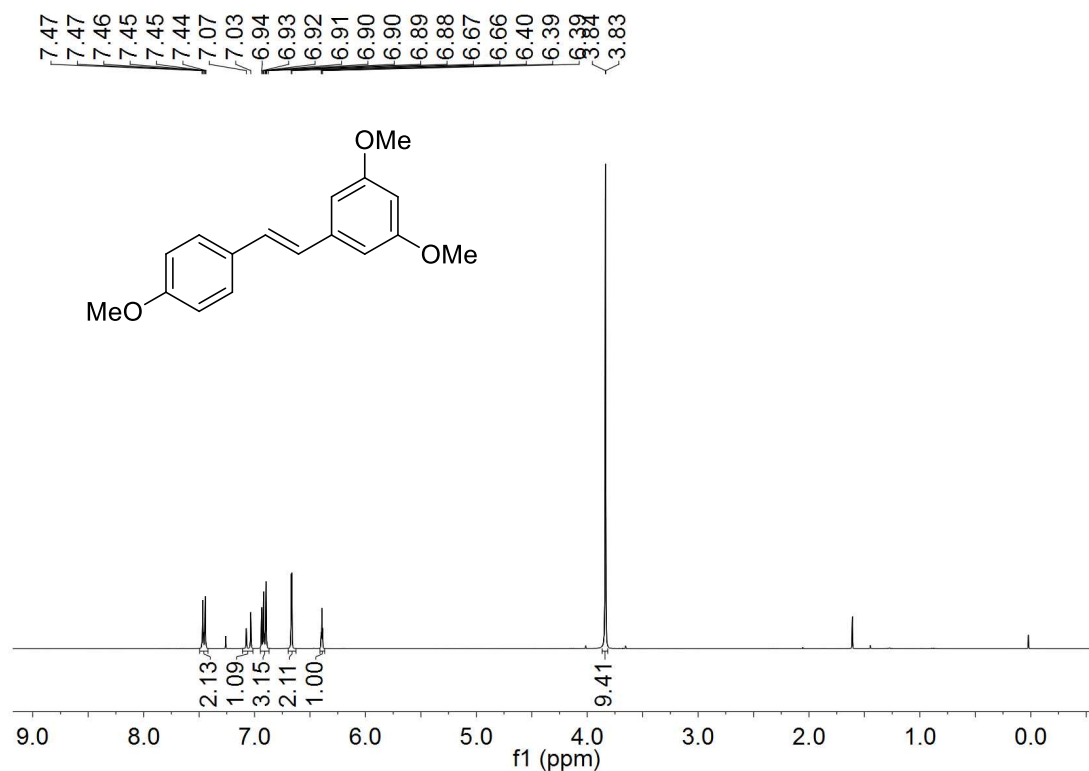

**Supplementary Figure S163. <sup>1</sup>H NMR spectrum for compound *E*-9 (400 MHz, CDCl<sub>3</sub>, 25 °C).**

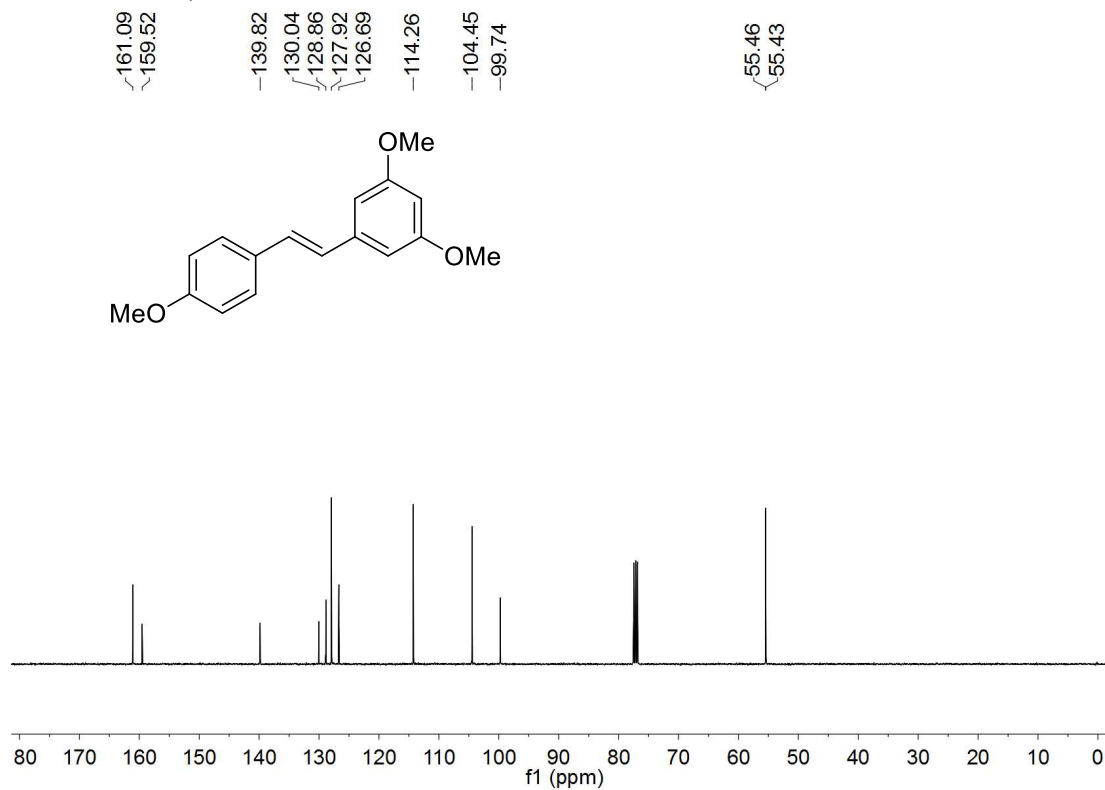

**Supplementary Figure S164. <sup>13</sup>C NMR spectrum for compound *E*-9 (100 MHz, CDCl<sub>3</sub>, 25 °C).**

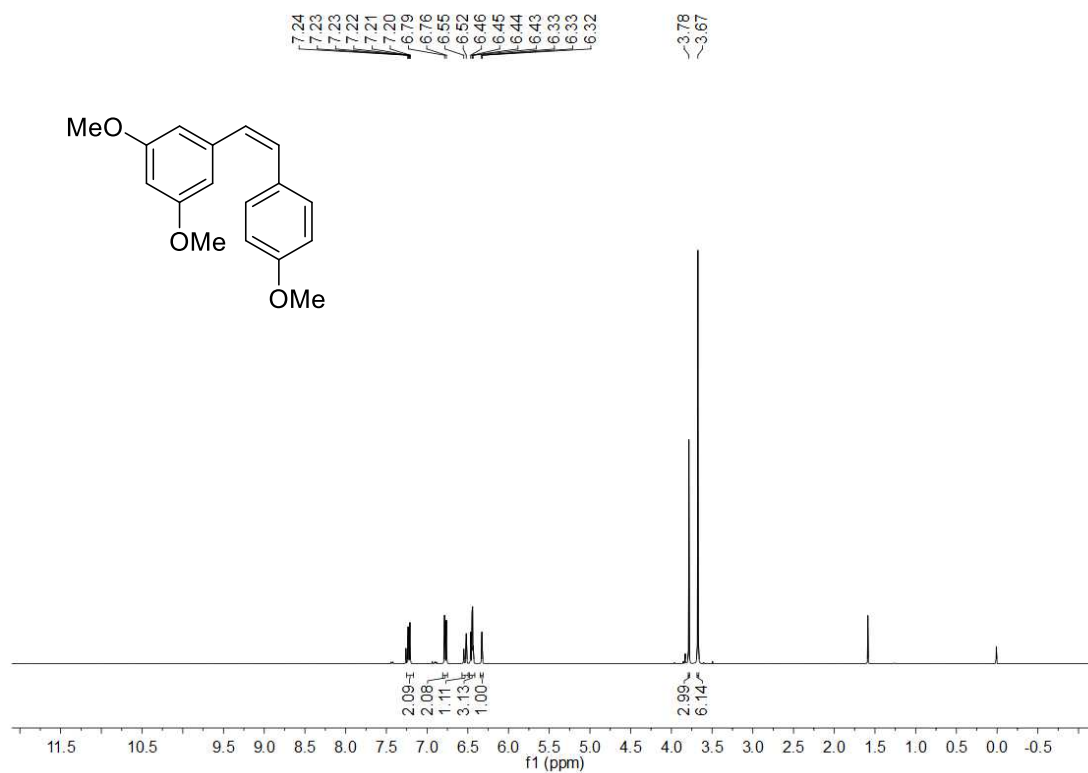

**Supplementary Figure S165.** <sup>1</sup>H NMR spectrum for compound Z-9 (400 MHz, CDCl<sub>3</sub>, 25 °C).

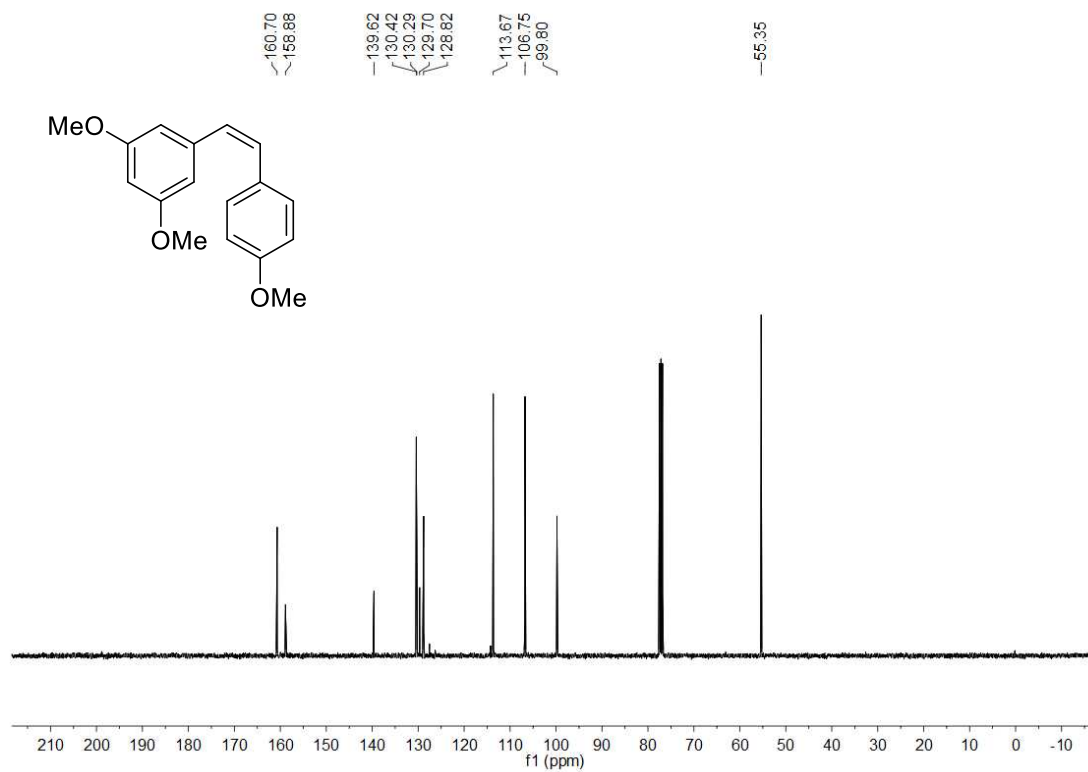

**Supplementary Figure S166.** <sup>13</sup>C NMR spectrum for compound Z-9 (100 MHz, CDCl<sub>3</sub>, 25 °C).



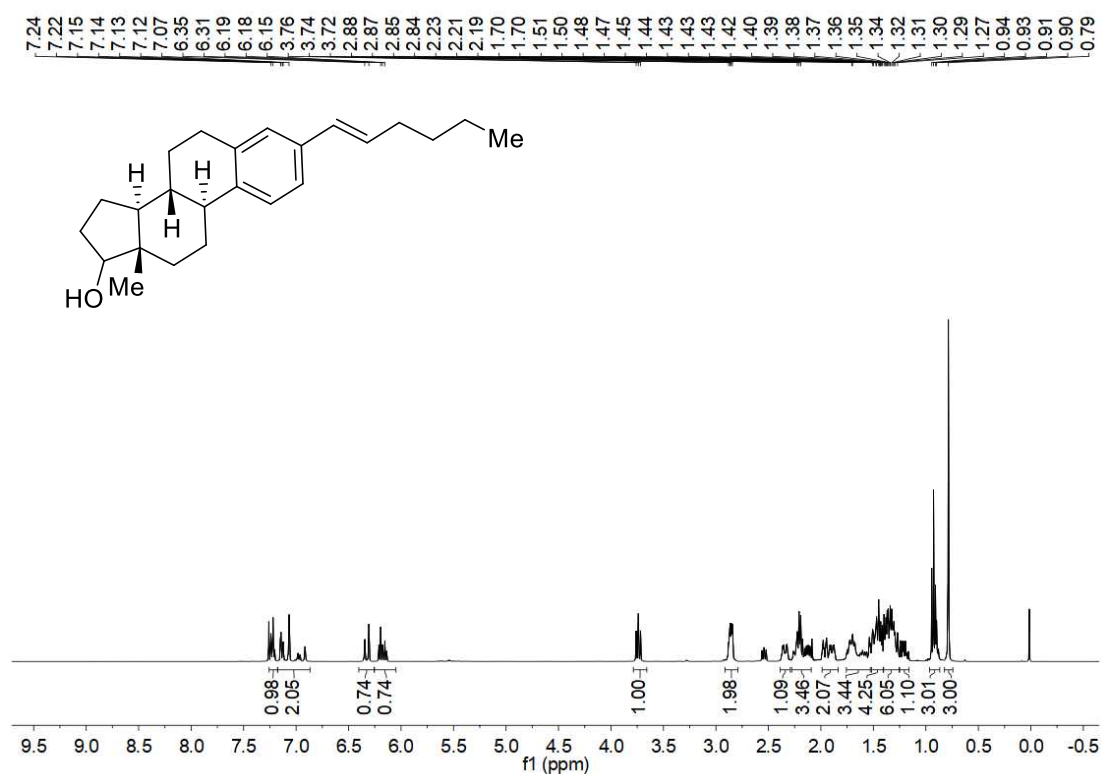

Supplementary Figure S167. <sup>1</sup>H NMR spectrum for compound E-11 (400 MHz, CDCl<sub>3</sub>, 25 °C).

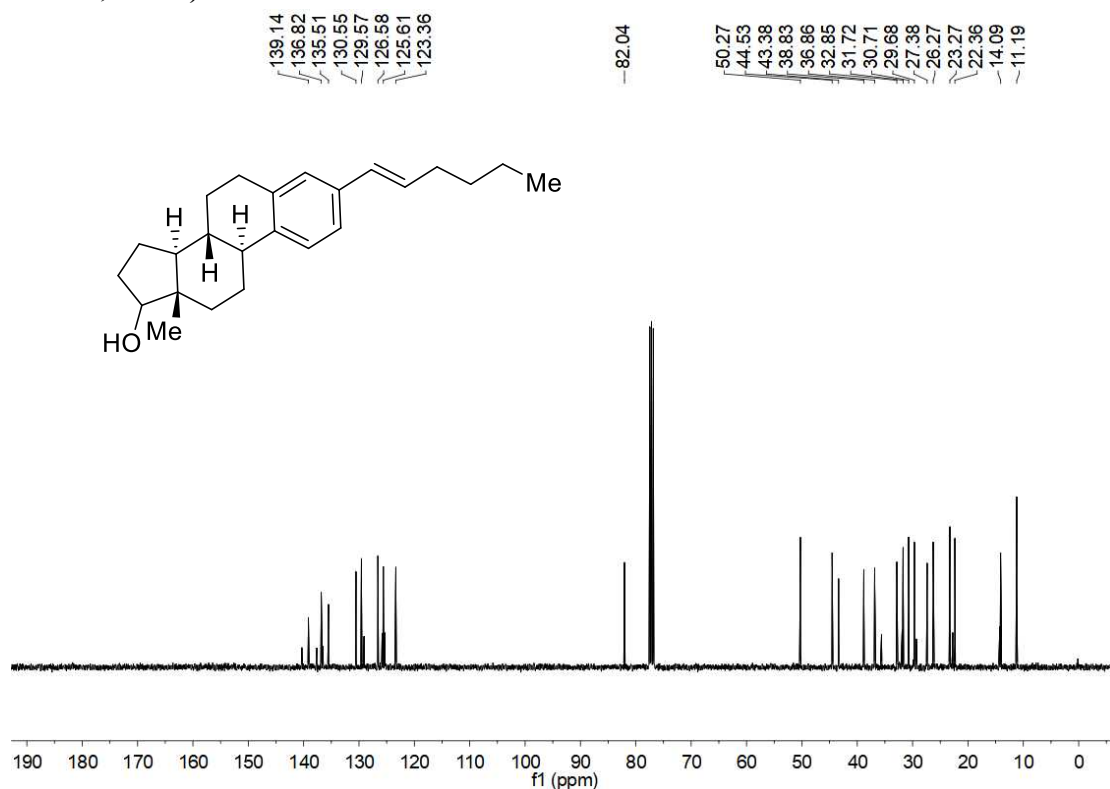

Supplementary Figure S168. <sup>13</sup>C NMR spectrum for compound E-11 (100 MHz, CDCl<sub>3</sub>, 25 °C).

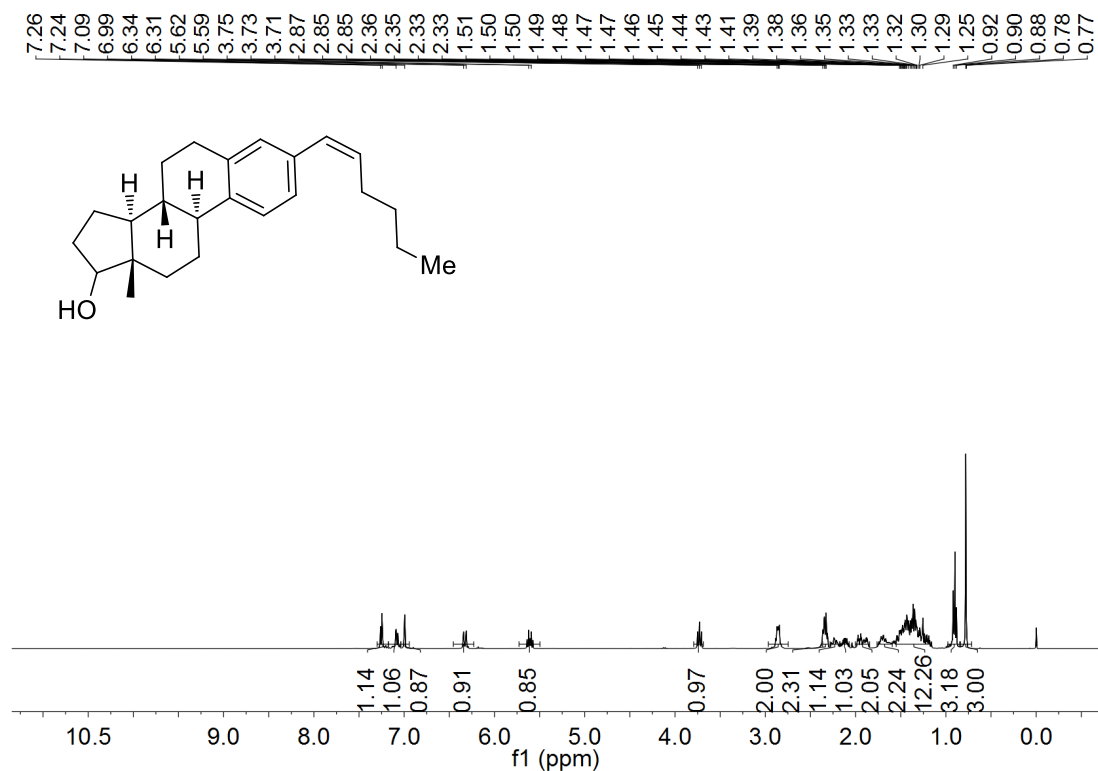

**Supplementary Figure S169.** <sup>1</sup>H NMR spectrum for compound Z-11 (400 MHz, CDCl<sub>3</sub>, 25 °C).

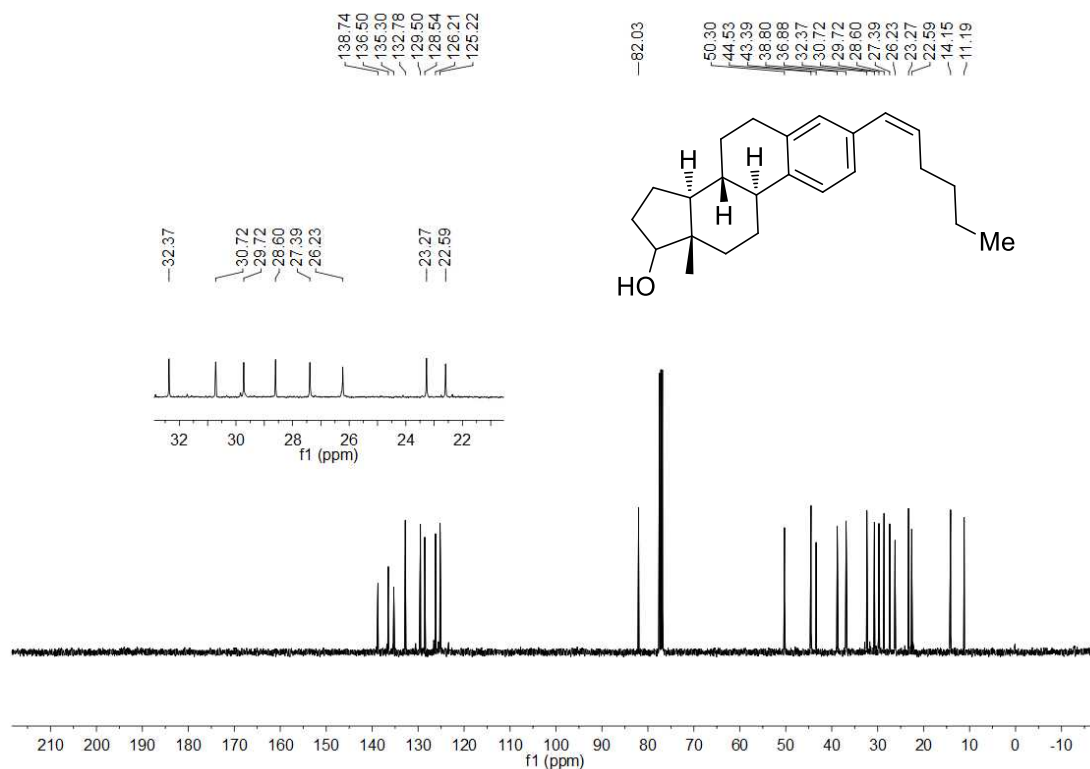

**Supplementary Figure S170.** <sup>13</sup>C NMR spectrum for compound Z-11 (100 MHz, CDCl<sub>3</sub>, 25 °C).

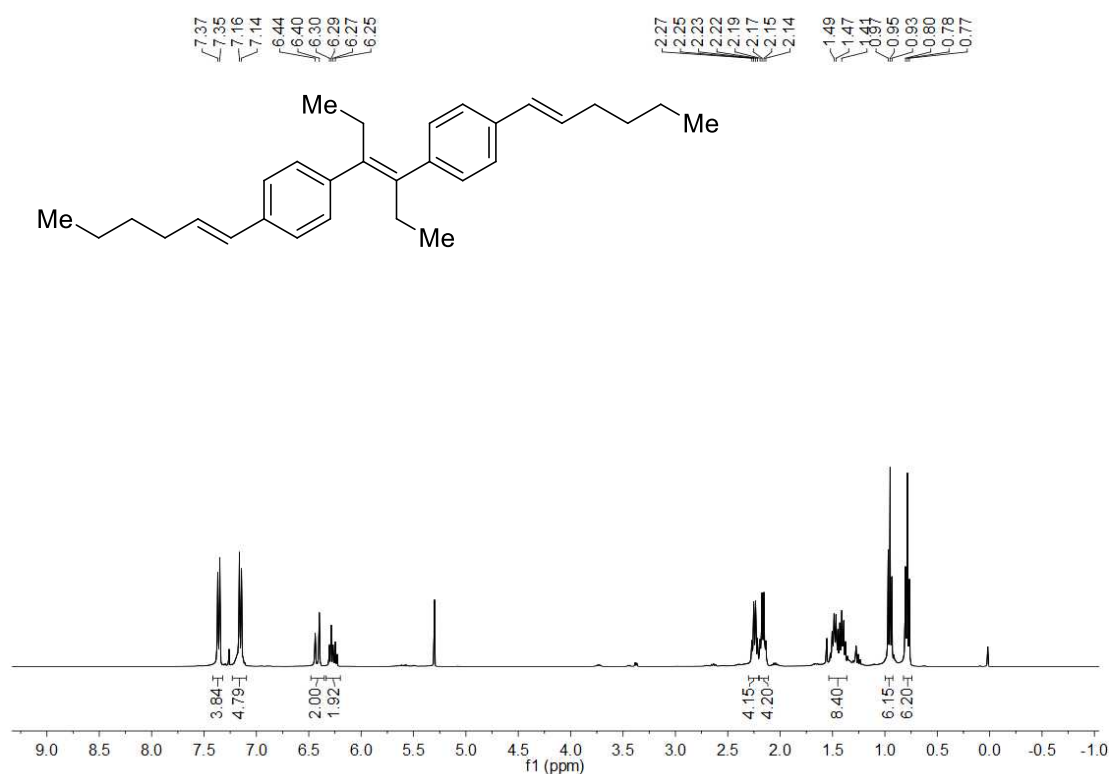

**Supplementary Figure S171.**  $^1\text{H}$  NMR spectrum for compound *E*-13 (400 MHz,  $\text{CDCl}_3$ , 25  $^\circ\text{C}$ ).

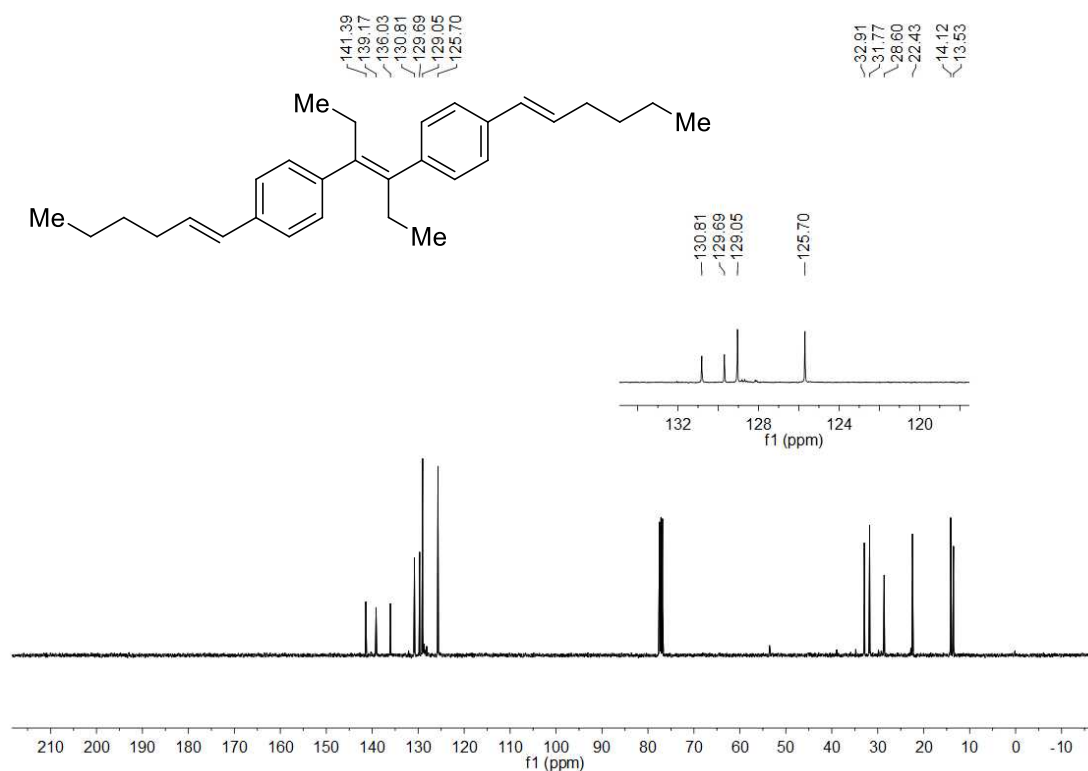

**Supplementary Figure S172.**  $^{13}\text{C}$  NMR spectrum for compound *E*-13 (100 MHz,  $\text{CDCl}_3$ , 25  $^\circ\text{C}$ ).

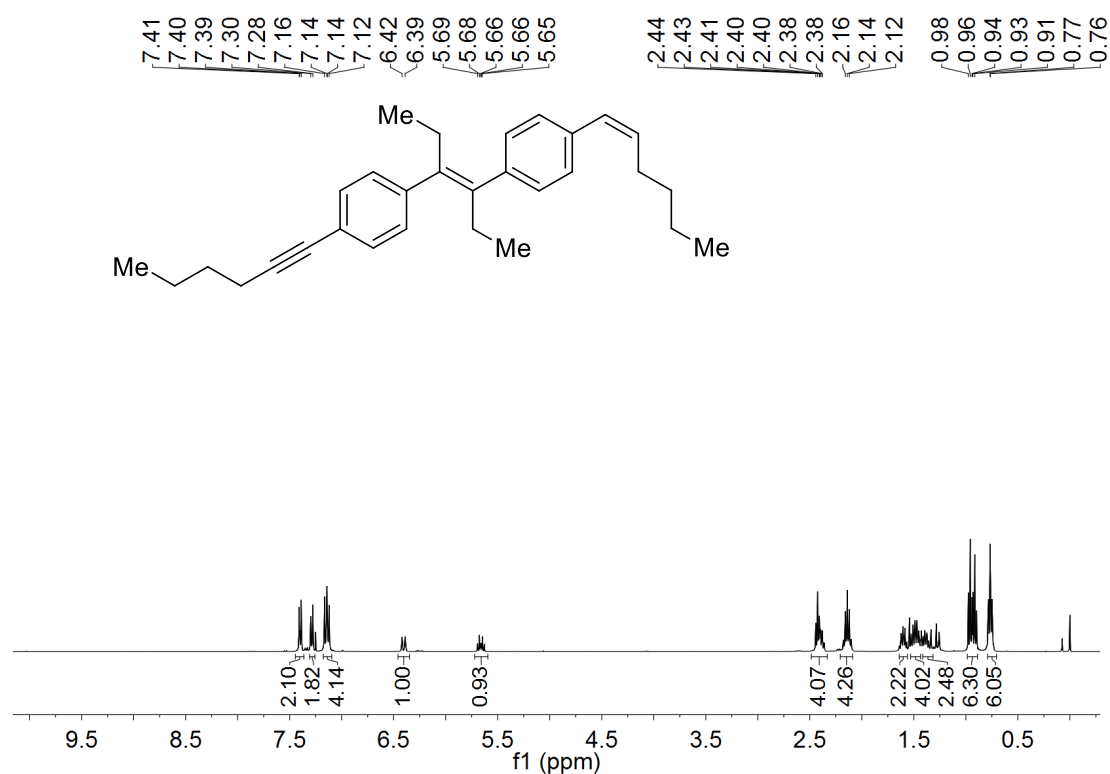

**Supplementary Figure S173. <sup>1</sup>H NMR spectrum for compound Z-13 (400 MHz, CDCl<sub>3</sub>, 25 °C).**

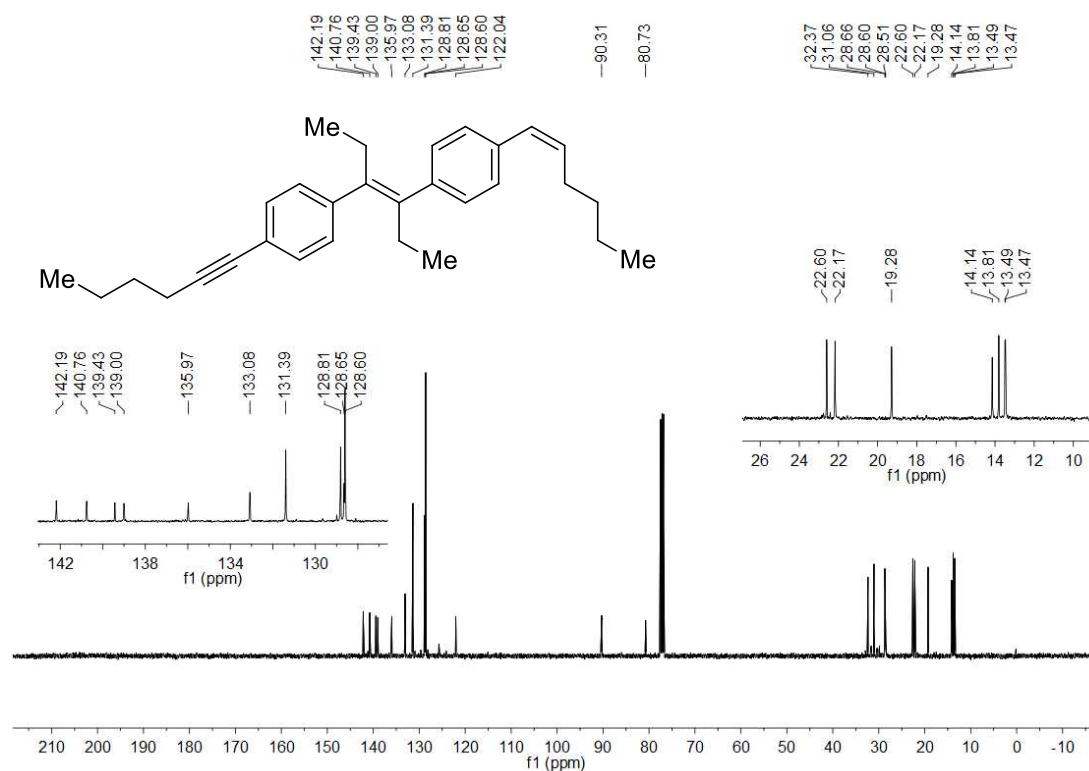

**Supplementary Figure S174. <sup>13</sup>C NMR spectrum for compound Z-13 (100 MHz, CDCl<sub>3</sub>, 25 °C).**

### 13. Supplementary References

1. Zhao, D., Candish, L., Paul, D. & Glorius, F. *N*-Heterocyclic Carbenes in Asymmetric Hydrogenation. *ACS Catal.* **6**, 5978–5988 (2016).
2. Zhao, L. et al. Cyclic (Alkyl)(amino)carbene Ligand-Promoted Nitro Deoxygenative Hydroboration with Chromium Catalysis: Scope, Mechanism, and Applications. *J. Am. Chem. Soc.* **143**, 1618–1629 (2021).
3. Chu, J., Munz, D., Jazzar, R., Melaimi, M. & Bertrand, G. Synthesis of Hemilabile Cyclic (Alkyl)(amino)carbenes (CAACs) and Applications in Organometallic Chemistry. *J. Am. Chem. Soc.* **138**, 7884–7887 (2016).
4. Namba, K., Wang, J., Cui, S. & Kishi, Y. Surprisingly Efficient Catalytic Cr-Mediated Coupling Reactions. *Org. Lett.* **7**, 5421–5424 (2005).
5. Fu, S. et al. Ligand-Controlled Cobalt-Catalyzed Transfer Hydrogenation of Alkynes: Stereodivergent Synthesis of *Z*- and *E*-Alkenes. *J. Am. Chem. Soc.* **138**, 8588–8594 (2016).
6. Lvanov, A. et al. Synthesis and phosphatase inhibitory activity of 3-alkynylestrones and their derivatives. *RSC Adv.* **6**, 11118–11127 (2016).
7. Chiu, H., Tonks, D. Trimethylsilyl-Protected Alkynes as Selective Cross-Coupling Partners in Titanium-Catalyzed [2+2+1] Pyrrole Synthesis. *Angew. Chem. Int. Ed.* **57**, 6090–6094 (2018).
8. Liu, Y., Hu, L., Chen, H. & Du, H. An Alkene-Promoted Borane-Catalyzed Highly Stereoselective Hydrogenation of Alkynes to Give *Z*- and *E*-Alkenes.

- Chem. Eur. J.* **21**, 3495–3501 (2015).
9. Gong, D., Hu, B., Yang, W., Kong, D., Xia, H. & Chen, D. A Bidentate Ru(II)-NC Complex as a Catalyst for Semihydrogenation of Alkynes to (*E*)-Alkenes with Ethanol. *Organometallics*, **39**, 862–869 (2020).
  10. Manna, S. & Antonchick, A. Catalytic Transfer Hydrogenation Using Biomass as Hydrogen Source. *ChemSusChem*, **12**, 3094–3098 (2019).
  11. Martina, K., Baricco, F., Caporaso, M., Berlier, G. & Cravotto, G. Cyclodextrin-Grafted Silica-Supported Pd Nanoparticles: An Efficient and Versatile Catalyst for Ligand-Free C–C Coupling and Hydrogenation. *ChemCatChem* **8**, 1176–1184 (2016).
  12. Murugesan, K. et al. Nickel-Catalyzed Stereodivergent Synthesis of *E*- and *Z*-Alkenes by Hydrogenation of Alkynes. *ChemSusChem*, **12**, 3363–3369 (2019).
  13. Yao, C., Li, Q., Wang, M., Ning, X. & Kang, Y. (*E*)-Specific direct Julia-olefination of aryl alcohols without extra reducing agents promoted by bases. *Chem. Commun.* **51**, 7729–7732 (2015).
  14. Luo, X., Chen, X., Chen, L., Zhang, K. & Li, Y. Xanthate-mediated synthesis of (*E*)-alkenes by semi-hydrogenation of alkynes using water as the hydrogen donor. *Chem. Commun.* **55**, 2170–2173 (2019).
  15. Westman, J. An Efficient Combination of Microwave Dielectric Heating and the Use of Solid-Supported Triphenylphosphine for Wittig Reactions. *Org. Lett.* **3**, 3745–3747 (2001).
  16. Andrews, P., Latham, C., Magre, M., Willcox, D. & Woodward, S.

- $\text{ZrCl}_2(\eta\text{-C}_5\text{Me}_5)_2\text{-AlHCl}_2\cdot(\text{THF})_2$ : efficient hydroalumination of terminal alkynes and cross-coupling of the derived alanes. *Chem. Commun.* **49**, 1488–1490 (2013).
17. Yu, X., Zhao, H., Li, P. & Koh, M. Iron-Catalyzed Tunable and Site-Selective Olefin Transposition. *J. Am. Chem. Soc.* **142**, 18223–18230 (2020).
  18. Yu, W., Liu, L., Huang, T., Zhou, X. & Chen, T. Palladium-Catalyzed Decarbonylative Heck Coupling of Aromatic Carboxylic Acids with Terminal Alkenes. *Org. Lett.* **22**, 7123–7128 (2020).
  19. Birepinte, M., Liautard, V., Chabaud, L. & Pucheault, M. Zirconium-Catalyzed Synthesis of Alkenylaminoboranes: From a Reliable Preparation of Alkenylboronates to a Direct Stereodivergent Access to Alkenyl Bromides. *Org. Lett.* **22**, 2838–2843 (2020).
  20. Akporji, N. et al. Selective Deprotection of the Diphenylmethylsilyl (DPMS) Hydroxyl Protecting Group under Environmentally Responsible, Aqueous Conditions. *ChemCatChem* **11**, 5743–5747 (2019).
  21. Giraud, A., Provot, O., Hamzé, A., Brion, J-D. & Alami, M. One-pot hydrosilylation–protodesilylation of functionalized diarylalkynes: a highly selective access to *Z*-stilbenes. Application to the synthesis of combretastatin A-4. *Tetrahedron Letters*. **49**, 1107–1110 (2008).
  22. Xiao, B. et al. Copper Nanocrystal Plane Effect on Stereoselectivity of Catalytic Deoxygenation of Aromatic Epoxides. *J. Am. Chem. Soc.* **137**, 3791–3794 (2015).
  23. Hancker, S., Neuman, H. & Beller, M. Development of a Palladium-Catalyzed Process for the Synthesis of *Z*-Alkenes by Sequential Sonogashira–Hydrogenation Reaction. *Eur. J. Org. Chem.* **38**, 5253–5259 (2018).
  24. Du, X., Hou, W., Zhang, Y., Huang, Z. Pincer cobalt complex-catalyzed

- Z-selective hydrosilylation of terminal alkynes. *Org. Chem. Front.* **4**, 1517–1521 (2017).
25. Miyaoura, M., Satoh, M., Suzuki, A. Stereo- and regiospecific syntheses to provide conjugated (*E,Z*)- and (*Z,Z*)-alkadienes, and arylated (*Z*)-alkenes in excellent yields via the palladium-catalyzed cross-coupling reactions of (*Z*)-1-alkenylboronates with 1-bromoalkenes and aryl iodides. *Tetrahedron Letters*. **27**, 3745–3748 (1986).
26. Krasovskiy, A., Haley, S., Voigtritter, K., Lipshutz, B. Stereoretentive Pd-Catalyzed Kumada–Corriu Couplings of Alkenyl Halides at Room Temperature. *Org. Lett.* **16**, 4066–4069 (2014).
27. Wissing, M., Niehues, M., Ravoo, B., Studer, A. Mixed AuPd Nanoparticles as Highly Active Catalysts for Alkyne *Z*-Semihydrogenation. *Eur. J. Org. Chem.* **26**, 3403–3409 (2018).
28. Carpita, A., Ribecai, A., Rosi, R. & Stabile, P. Synthesis of the racemic forms of carbon–carbon double bond locked analogues of strobilurins which are characterized by a 2-arylcyclopropane ring *cis*-substituted at C-1 by the methyl (*E*)-3-methoxypropenoate unit. *Tetrahedron* **58**, 3673–3680 (2002).
29. Moglie, Y., González-Soria, M., Martín-García, I., Radivoy, G. & Alonso, F. Catalyst- and solvent-free hydrophosphination and multicomponent hydrothiophosphination of alkenes and alkynes†. *Green Chem.* **18**, 4896–4907 (2016).
30. Wate, C. & Hashimota, T. Organoiodine-Catalyzed Enantioselective Intermolecular Oxyamination of Alkenes. *J. Am. Chem. Soc.* **143**, 1745–1751 (2021).
31. Hor, T. S. A. & Chee, S. Substituted metal carbonyls: III. Chromium, molybdenum and tungsten tricarbonyl complexes containing bipyridyl and a



- unidentate diphosphine: facile synthesis via trimethylamine *N*-oxide-induced decarbonylations. *J. Organomet. Chem.* **331**, 23–28 (1987).
32. Gradert, C., Krahmer, J., Sönnichsen, F., Näther, C. & Tucek, F. Small-Molecule Activation with Molybdenum(0) Complexes Supported by Mixed Imidazol-2-Ylidene/Phosphanyl Hybrid Ligands – Electronic and Structural Consequences of Substituting a Phosphane by a Carbene Group. *Eur. J. Inorg. Chem.* 3943–3955 (2013).
  33. Lee, S. X. et al. Synthesis of phenanthroline-based ligand and its UV activable tetracarbonyl photoCORMs based on chromium, molybdenum, and tungsten as cytotoxic and antimicrobial agents. *J. Organomet. Chem.* **954–955**, 122103 (2021).
  34. Kapat, A., Sperger, T., Guven, S. & Schoenebeck, F. *E*-Olefins through intramolecular radical relocation. *Science* **363**, 391–396 (2019).
  35. Cho, Y., Kim, H., An, H., Ahn, K. & Kang, E. Cycloaddition Reactions of Alkene Radical Cations using Iron(III)-Phenanthroline Complex. *Adv. Synth. Catal.* **362**, 2183–2188 (2020).
  36. Thiel, N., Kaewmee, B., Ngoc, T. & Teichert, J. A Simple Nickel Catalyst Enabling an *E*-Selective Alkyne Semihydrogenation. *Chem. Eur. J.* **26**, 1597–1603 (2020).
  37. Gaussian 16, Revision E.01: Frisch, M. J., Gaussian, Inc., Wallingford, CT, (2010)
  38. Lee, C., Yang, W. & Parr, R. G. Development of the Colle-Salvetti correlation energy formula into a functional of the electron density. *Phys. Rev. B* **37**, 785–789 (1988).

39. Stephens, P. J., Devlin, F. J., Chabalowski, C. F. & Frisch, M. J. Ab Initio Calculation of Vibrational Absorption and Circular Dichroism Spectra Using Density Functional Force Fields. *J. Phys. Chem.* **98**, 11623–11627 (1994).
40. Grimme, S., Antony, J., Ehrlich, S. & Krieg, H. A consistent and accurate ab initio parametrization of density functional dispersion correction (DFT-D) for the 94 elements H-Pu. *J. Chem. Phys.* **132**, 154104 (2010).
41. Grimme, S. Semiempirical GGA-type density functional constructed with a long-range dispersion correction. *J. Comput. Chem.* **27**, 1786–1799 (2006).
42. Grimme, S. Accurate description of van der Waals complexes by density functional theory including empirical corrections. *J. Comput. Chem.* **25**, 1463–1473 (2004).
43. Legault, C. Y. CYL-View, 1.0b; Université de Sherbrooke: Sherbrooke, Quebec, Canada, (2009).
44. Falivene, L. et al. Towards the online computer-aided design of catalytic pockets. *Nat. Chem.* **11**, 872–879 (2019).
